# Supplementary material
Source: PubMed Central journal article supplement (PMC5223059)
Supplement: mmc1.pdf [file mmc1.pdf]

## Supplemental Data

### Genome-wide Trans-ethnic Meta-analysis Identifies Seven Genetic Loci Influencing Erythrocyte Traits and a Role for *RBPMS* in Erythropoiesis

Frank J.A. van Rooij, Rehan Qayyum, Albert V. Smith, Yi Zhou, Stella Trompet, Toshiko Tanaka, Margaux F. Keller, Li-Ching Chang, Helena Schmidt, Min-Lee Yang, Ming-Huei Chen, James Hayes, Andrew D. Johnson, Lisa R. Yanek, Christian Mueller, Leslie Lange, James S. Floyd, Mohsen Ghanbari, Alan B. Zonderman, J. Wouter Jukema, Albert Hofman, Cornelia M. van Duijn, Karl C. Desch, Yasaman Saba, Ayse B. Ozel, Beverly M. Snively, Jer-Yuarn Wu, Reinhold Schmidt, Myriam Fornage, Robert J. Klein, Caroline S. Fox, Koichi Matsuda, Naoyuki Kamatani, Philipp S. Wild, David J. Stott, Ian Ford, P. Eline Slagboom, Jaden Yang, Audrey Y. Chu, Amy J. Lambert, André G. Uitterlinden, Oscar H. Franco, Edith Hofer, David Ginsburg, Bella Hu, Brendan Keating, Ursula M. Schick, Jennifer A. Brody, Jun Z. Li, Zhao Chen, Tanja Zeller, Jack M. Guralnik, Daniel I. Chasman, Luanne L. Peters, Michiaki Kubo, Diane M. Becker, Jin Li, Gudny Eiriksdottir, Jerome I. Rotter, Daniel Levy, Vera Grossmann, Kushang V. Patel, Chien-Hsiun Chen, The BioBank Japan Project, Paul M. Ridker, Hua Tang, Lenore J. Launer, Kenneth M. Rice, Ruifang Li-Gao, Luigi Ferrucci, Michelle K. Evans, Avik Choudhuri, Eirini Trompouki, Brian J. Abraham, Song Yang, Atsushi Takahashi, Yoichiro Kamatani, Charles Kooperberg, Tamara B. Harris, Sun Ha Jee, Josef Coresh, Fuu-Jen Tsai, Dan L. Longo, Yuan-Tsong Chen, Janine F. Felix, Qiong Yang, Bruce M. Psaty, Eric Boerwinkle, Lewis C. Becker, Dennis O. Mook-Kanamori, James G. Wilson, Vilmundur Gudnason, Christopher J. O'Donnell, Abbas Dehghan, L. Adrienne Cupples, Michael A. Nalls, Andrew P. Morris, Yukinori Okada, Alexander P. Reiner, Leonard I. Zon, and Santhi K. Ganesh

## SUPPLEMENTAL INFORMATION

### Individual Study Methods and Cohort Descriptions

#### Supplemental Methods

Additional human replication findings

Pleiotropy analysis

#### Supplemental Tables

|            |                                                                                                                                                                                                               |
|------------|---------------------------------------------------------------------------------------------------------------------------------------------------------------------------------------------------------------|
| Table S1:  | Population Characteristics of Each Cohort                                                                                                                                                                     |
| Table S2:  | Erythrocyte trait definitions                                                                                                                                                                                 |
| Table S3:  | Replication of established loci                                                                                                                                                                               |
| Table S4:  | Ethnic-specific results                                                                                                                                                                                       |
| Table S5:  | Replication of novel findings in the Gutenberg Health Study (cohorts GHS1 and GHS2), the Genes and Blood-Clotting (GBC) Study, the NEO study, and the JUPITER trial (Replication data only)                   |
| Table S6:  | Replication of novel findings in the Gutenberg Health Study (cohorts GHS1 and GHS2), the Genes and Blood-Clotting (GBC) Study, the NEO study, and the JUPITER trial (Discovery and Replication data combined) |
| Table S7:  | Fine mapping of novel and established loci identified in European ancestry meta-analysis by MANTRA trans-ethnic analysis.                                                                                     |
| Table S8:  | ENCODE analysis of functional elements for the MCH chromosome 8 region (RBPMS)                                                                                                                                |
| Table S9:  | Mouse QTL validation of MANTRA transethnic findings (summary, organized by trait)                                                                                                                             |
| Table S10: | Correlation matrix red blood cell traits                                                                                                                                                                      |

#### Supplemental Figures

-log P value plots and varLD plots

#### Supplemental References

#### Acknowledgements

## Individual Study Methods and Cohort Descriptions

The cohorts contributing to this study were general population samples. All participants provided written informed consent and studies were approved by their local Research Ethics Committees and/or Institutional Review Boards. Summary demographic characteristics are listed in **Table S2**. References for ascertainment methods and erythrocyte trait measurement for each participating study are given below.

### European Ancestry Cohorts

Age, Gene/Environment Susceptibility-Reykjavik Study (AGES)<sup>1,2</sup>

Atherosclerosis Risk in Communities Study (ARIC)<sup>2,3</sup>

Austrian Stroke Prevention Study (ASPS)<sup>4</sup>

Baltimore Longitudinal Study of Aging (BLSA)<sup>5</sup>

Coronary Artery Risk Development in Young Adults (CARDIA)<sup>6</sup>

Cardiovascular Health Study (CHS)<sup>2,7</sup>

Framingham Heart Study (FHS)<sup>2,8</sup>

Johns Hopkins Genetic Study of Atherosclerosis Risk (GeneSTAR)<sup>9-11</sup>

Health, Aging, and Body Composition (HealthABC)<sup>9,12</sup>

Invecchiare in Chianti Study (InCHIANTI)<sup>5</sup>

PROspective Study of Pravastatin in the Elderly at Risk (PROSPER/PHASE)<sup>13</sup>

Rotterdam Study I (RS-I)<sup>2,14</sup>

Rotterdam Study II (RS-II)<sup>14</sup>

Rotterdam Study III (RS-III)<sup>14</sup>

### East-Asian Ancestry Cohorts

The BioBank Japan Project (RIKEN)<sup>15,16</sup>

Asian Genetic Epidemiology Network (AGEN)<sup>17,18</sup>

### African-American Ancestry Cohorts

Atherosclerosis Risk in Communities Study (ARIC)<sup>3,12,19</sup>

Jackson Heart Study (JHS)<sup>12,19,20</sup>

Coronary Artery Risk Development in Young Adults (CARDIA)<sup>6,12,19</sup>

Cardiovascular Health Study (CHS)<sup>7</sup>

Johns Hopkins Genetic Study of Atherosclerosis Risk (GeneSTAR)<sup>9-11</sup>

Health, Aging, and Body Composition (HealthABC)<sup>9,12</sup>

Women's Health Initiative (WHI)<sup>12,19,21</sup>

Replication CohortsGutenberg Health Study (GHS)<sup>22</sup>

Genes and Blood-Clotting Study (GBC)<sup>23</sup>

Netherlands Epidemiology of Obesity Study (NEO)<sup>24</sup>

JUPITER Trial<sup>25</sup>

HealthyAging in Neighborhoods of Diversity across the Life Span (HANDLS)<sup>9,12</sup>

## Supplemental Methods and Results

### Additional Human Replication Findings

The discovery and replication results were meta-analysed separately for the EUR and AFR cohorts in METAL and with RE2, and as a further step, the combined METAL results were further meta-analysed with the EAS discovery data using METAL, MANTRA and RE2 methods. (**Table S5**).

In both the replication and discovery samples, we verified the allele directions in the original input files to address the question whether allele flipping could account for the *RPMS* finding for MCH. In our results rs2979489 only became genome-wide significant in the trans-ethnic meta-analysis; the individual ethnic-specific results were not significant. We checked the allele frequencies in several 1000G panels. In all cases A was the most common allele and G the rarest, as is the case in our HapMap analyses.

### Pleiotropy analysis

To further relate these findings in the *rbpms* gene family back to the human association data, we evaluated *RPMS* in WBC traits and *RPMS2* in our RBC analyses and WBC traits. The purpose of this analysis was to explore possible pleiotropy which might suggest effects on an earlier hematopoietic progenitor cell.

Variants in the *RPMS* and *RPMS2* gene regions (+/- 50kb from exon borders) showed no association with WBC traits in a trans-ethnic analysis of the same cohorts.<sup>26</sup> Further, there was no evidence of association with erythrocyte traits in the *RPMS2* region. Therefore, while there may be evidence of a functional class effect of the *rbpms* genes in the zebrafish experimental data, the human association data suggest that genetic variation in the *RPMS* locus specifically influences erythrocyte traits in humans and that *RPMS* is likely the true causal gene underlying this association.

## Supplemental Figures

### Figure S1

#### **-log P value plots and varLD plots**

Regional association plots for loci identified by our trans-ethnic analysis. For each trait-locus identified in the MANTRA analyses, including the novel and previously known loci, we have plotted the individual ethnicity-specific meta-analysis (METAL) results, the trans-ethnic fixed effects meta-analysis (METAL) and the Bayesian meta-analysis (MANTRA) results with SNPs colored according to the credible interval set for that region. Also shown for each region is the pair-wise LD correlation (varLD) and RNA expression of genes within the locus in erythroblast cell lines).<sup>27</sup>

Index for Figure S1

| trait | Region | chr | cyto  | Index SNP  | Total_gene | Page |
|-------|--------|-----|-------|------------|------------|------|
| Hct   | 1      | 2   | 2p21  | rs4953318  | PRKCE      | 10   |
| Hct   | 2      | 2   | 2q21  | rs6430549  | ACMSD      | 11   |
| Hct   | 3      | 4   | 4q12  | rs218237   | KIT        | 12   |
| Hct   | 4      | 4   | 4q21  | rs1398018  | SHROOM3    | 13   |
| Hct   | 5      | 6   | 6p22  | rs1800562  | HFE        | 14   |
| Hct   | 6      | 6   | 6q23  | rs9399137  | HBS1L      | 15   |
| Hct   | 7      | 7   | 7q22  | rs2075672  | ACTL6B     | 16   |
| Hct   | 8      | 7   | 7q31  | rs2299433  | MET        | 17   |
| Hct   | 9      | 7   | 7q36  | rs10224210 | PRKAG2     | 18   |
| Hct   | 10     | 9   | 9q34  | rs495828   | ABO        | 19   |
| Hct   | 11     | 10  | 10q21 | rs16926246 | HK1        | 20   |
| Hct   | 12     | 12  | 12q24 | rs3184504  | SH2B3      | 21   |
| Hct   | 13     | 15  | 15q24 | rs4886755  | NRG4       | 22   |
| Hct   | 14     | 17  | 17q21 | rs241030   | CRHR1      | 23   |
| Hct   | 15     | 22  | 22q12 | rs2413450  | TMPRSS6    | 24   |
| Hct   | 16     | 22  | 22q13 | rs5765524  | FBLN1      | 25   |
| Hb    | 1      | 2   | 2p21  | rs4953318  | PRKCE      | 27   |
| Hb    | 2      | 3   | 3q29  | rs12632706 | TFRC       | 28   |
| Hb    | 3      | 4   | 4q12  | rs170117   | KIT        | 29   |
| Hb    | 4      | 6   | 6p22  | rs1800562  | HFE        | 30   |
| Hb    | 5      | 6   | 6p21  | rs412657   | NOTCH4     | 31   |
| Hb    | 6      | 7   | 7q22  | rs1617640  | EPO        | 32   |
| Hb    | 7      | 7   | 7q31  | rs2299433  | MET        | 33   |
| Hb    | 8      | 7   | 7q36  | rs10480299 | PRKAG2     | 34   |
| Hb    | 9      | 9   | 9q34  | rs495828   | ABO        | 35   |
| Hb    | 10     | 10  | 10q21 | rs16926246 | HK1        | 36   |
| Hb    | 11     | 12  | 12q24 | rs11066301 | PTPN11     | 37   |
| Hb    | 12     | 15  | 15q24 | rs4886755  | NRG4       | 38   |
| Hb    | 13     | 16  | 16p13 | rs2562181  | MPG        | 39   |
| Hb    | 14     | 17  | 17q21 | rs241030   | CRHR1      | 40   |
| Hb    | 15     | 22  | 22q12 | rs4820268  | TMPRSS6    | 41   |
| MCHC  | 1      | 1   | 1q23  | rs2479868  | SPTA1      | 43   |
| MCHC  | 2      | 6   | 6p22  | rs198846   | HIST1H1T   | 44   |
| MCHC  | 3      | 6   | 6q23  | rs9376090  | HBS1L      | 45   |
| MCHC  | 4      | 8   | 8p11  | rs4737009  | ANK1       | 46   |
| MCHC  | 5      | 12  | 12q24 | rs671      | NA         | 47   |
| MCHC  | 6      | 16  | 16p13 | rs7197554  | C16orf35   | 48   |
| MCHC  | 7      | 16  | 16q24 | rs2608604  | CDT1       | 49   |
| MCHC  | 8      | 22  | 22q12 | rs2413450  | TMPRSS6    | 50   |
| MCH   | 1      | 1   | 1q31  | rs12127588 | PTPRC      | 52   |
| MCH   | 2      | 2   | 2p16  | rs13019832 | BCL11A     | 53   |
| MCH   | 3      | 3   | 3p24  | rs2060597  | PLCL2      | 54   |
| MCH   | 4      | 3   | 3p24  | rs1505307  | THR3       | 55   |
| MCH   | 5      | 3   | 3q23  | rs6791816  | ATR        | 56   |
| MCH   | 6      | 3   | 3q29  | rs9859401  | TFRC       | 57   |

|     |    |    |       |            |                    |     |
|-----|----|----|-------|------------|--------------------|-----|
| MCH | 7  | 4  | 4q12  | rs218237   | KIT                | 58  |
| MCH | 8  | 5  | 5p15  | rs2736100  | TERT               | 59  |
| MCH | 9  | 6  | 6p22  | rs1800562  | HFE                | 60  |
| MCH | 10 | 6  | 6p21  | rs9349205  | CCND3              | 61  |
| MCH | 11 | 6  | 6q21  | rs9400273  | CCDC162P/CD164     | 62  |
| MCH | 12 | 6  | 6q23  | rs7776054  | HBS1L              | 63  |
| MCH | 13 | 6  | 6q24  | rs592423   | CITED2/LOC655434   | 64  |
| MCH | 14 | 7  | 7p12  | rs12669559 | IKZF1              | 65  |
| MCH | 15 | 7  | 7q22  | rs12532878 | MOSPD3             | 66  |
| MCH | 16 | 8  | 8p21  | rs2076940  | XPO7               | 67  |
| MCH | 17 | 8  | 8p12  | rs2979489  | RBPMS              | 68  |
| MCH | 18 | 9  | 9p24  | rs10758656 | RCL1/MIR101-2      | 69  |
| MCH | 19 | 10 | 10q11 | rs11239550 | 08-mrt             | 70  |
| MCH | 20 | 10 | 10q11 | rs17720193 | NA                 | 71  |
| MCH | 21 | 12 | 12p13 | rs7309743  | CCND2              | 72  |
| MCH | 22 | 12 | 12q24 | rs2074356  | NA                 | 73  |
| MCH | 23 | 14 | 14q23 | rs7155454  | FNTB/MIR4706       | 74  |
| MCH | 24 | 15 | 15q22 | rs7165102  | C15orf44           | 75  |
| MCH | 25 | 16 | 16p13 | rs1122794  | ITFG3              | 76  |
| MCH | 26 | 17 | 17q11 | rs9892942  | ERAL1              | 77  |
| MCH | 27 | 19 | 19p13 | rs8887     | KIAA1881/PLIN4     | 78  |
| MCH | 28 | 19 | 19p13 | rs2242517  | GCDH               | 79  |
| MCH | 29 | 20 | 20q13 | rs737092   | RBM38              | 80  |
| MCH | 30 | 22 | 22q12 | rs2413450  | TMPRSS6            | 81  |
| MCV | 1  | 1  | 1q23  | rs12041363 | OR10R2             | 83  |
| MCV | 2  | 1  | 1q31  | rs1036332  | PTPRC/LOC100131234 | 84  |
| MCV | 3  | 1  | 1q44  | rs3811444  | TRIM58             | 85  |
| MCV | 4  | 2  | 2p25  | rs10929547 | ID2                | 86  |
| MCV | 5  | 2  | 2p16  | rs13027161 | BCL11A/MIR4432     | 87  |
| MCV | 6  | 3  | 3p24  | rs9821630  | PLCL2              | 88  |
| MCV | 7  | 3  | 3p24  | rs1505307  | THRB               | 89  |
| MCV | 8  | 3  | 3q23  | rs6780250  | ATR                | 90  |
| MCV | 9  | 3  | 3q29  | rs3893275  | ZDHHC19            | 91  |
| MCV | 10 | 4  | 4q12  | rs218237   | KIT                | 92  |
| MCV | 11 | 5  | 5p15  | rs2736100  | TERT               | 93  |
| MCV | 12 | 6  | 6p22  | rs198833   | HIST1H1T           | 94  |
| MCV | 13 | 6  | 6p21  | rs9349205  | CCND3              | 95  |
| MCV | 14 | 6  | 6q21  | rs9374080  | CD164/CCDC162P     | 96  |
| MCV | 15 | 6  | 6q23  | rs7776054  | HBS1L              | 97  |
| MCV | 16 | 6  | 6q24  | rs592423   | CITED2/LOC645434   | 98  |
| MCV | 17 | 6  | 6q26  | rs381500   | QKI                | 99  |
| MCV | 18 | 7  | 7p12  | rs12718598 | IKZF1              | 100 |
| MCV | 19 | 7  | 7q22  | rs7385804  | TFR2               | 101 |
| MCV | 20 | 8  | 8p21  | rs10503716 | XPO7               | 102 |
| MCV | 21 | 8  | 8p12  | rs2979489  | RBPMS              | 103 |
| MCV | 22 | 9  | 9p24  | rs10758658 | RCL1/MIR101-2      | 104 |
| MCV | 23 | 9  | 9q34  | rs8176749  | ABO                | 105 |
| MCV | 24 | 10 | 10q11 | rs963029   | 08-mrt             | 106 |
| MCV | 25 | 12 | 12p13 | rs11611647 | CCND2              | 107 |
| MCV | 26 | 12 | 12q24 | rs2074356  | NA                 | 108 |
| MCV | 27 | 14 | 14q23 | rs726668   | MAXMIR4706         | 109 |
| MCV | 28 | 15 | 15q22 | rs7176565  | DENND4A/MIR4511    | 110 |



|     |    |    |       |            |                  |     |
|-----|----|----|-------|------------|------------------|-----|
| MCV | 29 | 16 | 16p13 | rs13336641 | NA               | 111 |
| MCV | 30 | 17 | 17q11 | rs12325788 | TRAF4            | 112 |
| MCV | 31 | 18 | 18q21 | rs9949494  | C18orf25         | 113 |
| MCV | 32 | 19 | 19p13 | rs8887     | KIAA1881/PLIN4   | 114 |
| MCV | 33 | 19 | 19p13 | rs9384     | GCDH             | 115 |
| MCV | 34 | 20 | 20q11 | rs6121246  | FKHL18/FOXS1     | 116 |
| MCV | 35 | 20 | 20q13 | rs737092   | RBM38            | 117 |
| MCV | 36 | 22 | 22q11 | rs4820091  | UBE2L3           | 118 |
| MCV | 37 | 22 | 22q12 | rs5754115  | FBXO7            | 119 |
| MCV | 38 | 22 | 22q12 | rs2413450  | TMPRSS6          | 120 |
| MCV | 39 | 22 | 22q13 | rs140522   | LOC440836/ODF3B  | 121 |
|     |    |    |       |            |                  |     |
| RBC | 1  | 2  | 2p21  | rs4952800  | PRKCE            | 123 |
| RBC | 2  | 4  | 4p14  | rs3860068  | TMEM156          | 124 |
| RBC | 3  | 4  | 4q12  | rs218237   | KIT              | 125 |
| RBC | 4  | 6  | 6p21  | rs9349205  | CCND3            | 126 |
| RBC | 5  | 6  | 6q21  | rs9400273  | CD164/CCDC162P   | 127 |
| RBC | 6  | 6  | 6q23  | rs9376090  | HBS1L            | 128 |
| RBC | 7  | 6  | 6q24  | rs592423   | CITED2/LOC645434 | 129 |
| RBC | 8  | 7  | 7q22  | rs2075672  | ACTL6B           | 130 |
| RBC | 9  | 9  | 9p24  | rs10758656 | RCL1/MIR101-2    | 131 |
| RBC | 10 | 9  | 9q34  | rs579459   | ABO              | 132 |
| RBC | 11 | 12 | 12p13 | rs7309743  | CCND2            | 133 |
| RBC | 12 | 16 | 16p13 | rs13339636 | NA               | 134 |
| RBC | 13 | 17 | 17q21 | rs2732706  | LRRC37A          | 135 |
| RBC | 14 | 19 | 19p13 | rs17706531 | GCDH             | 136 |
| RBC | 15 | 22 | 22q13 | rs12148    | SCO2             | 137 |

---

HCT

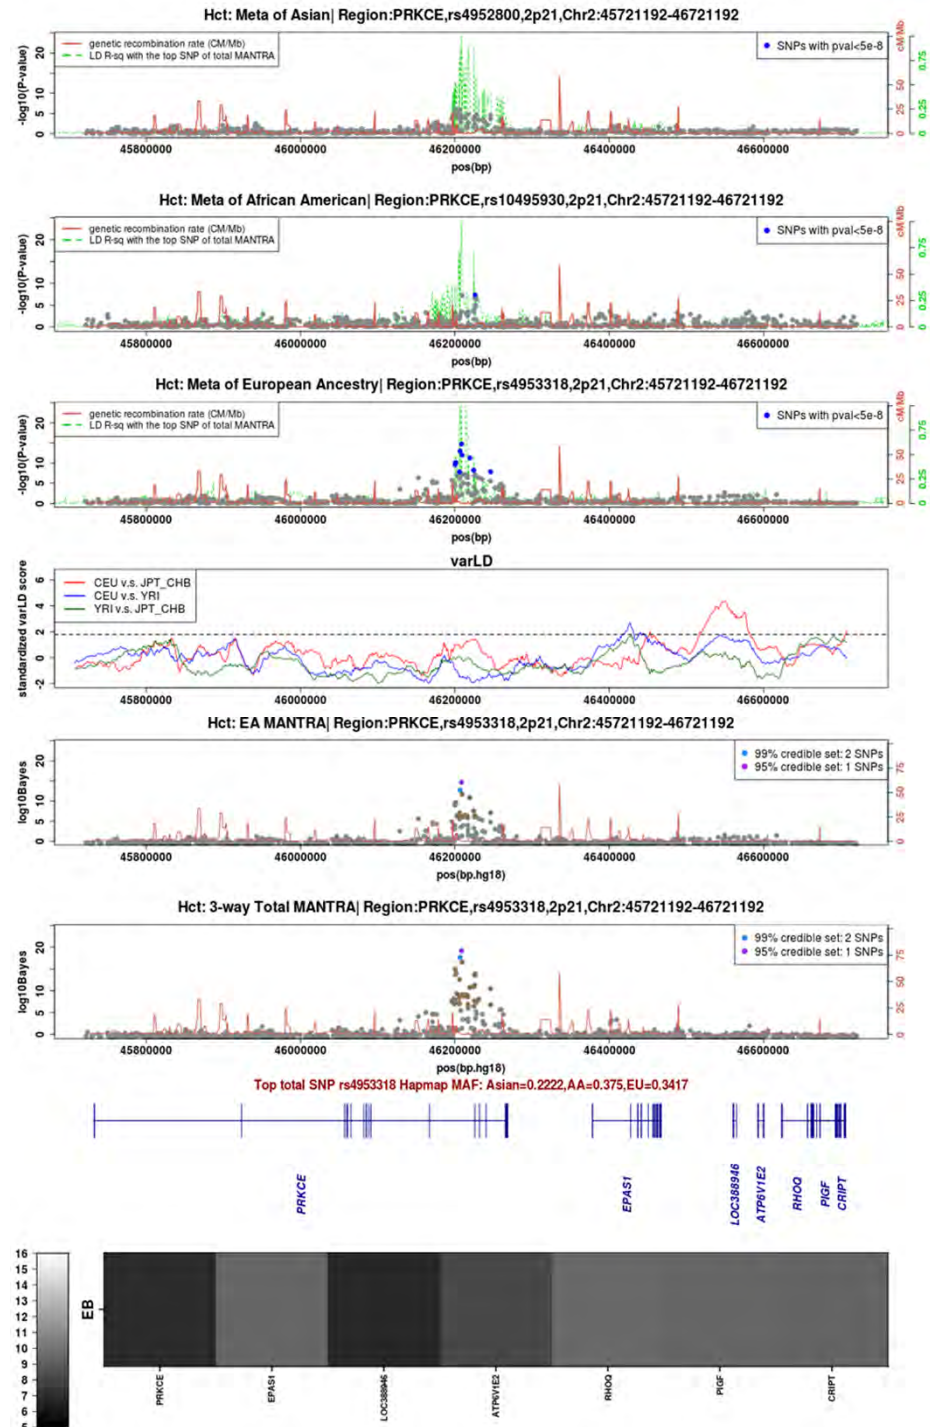

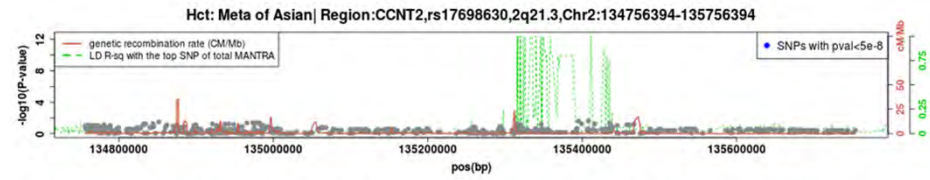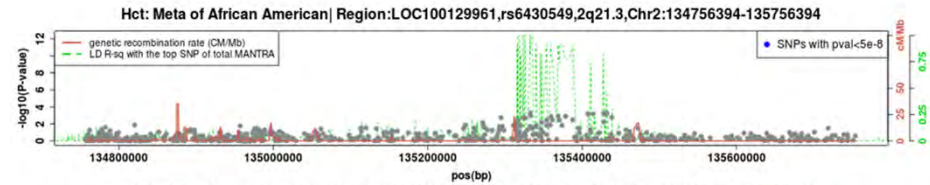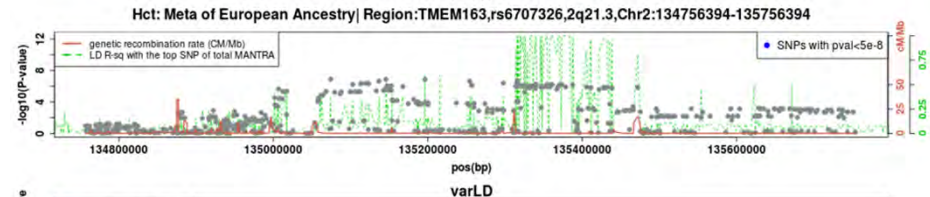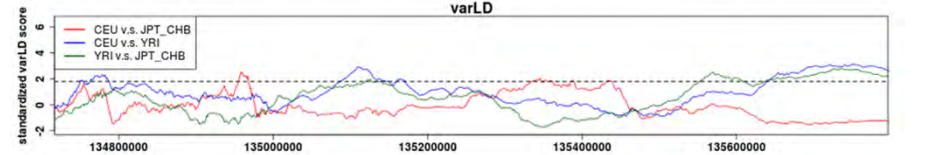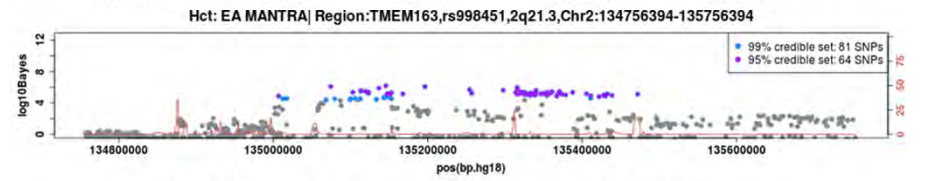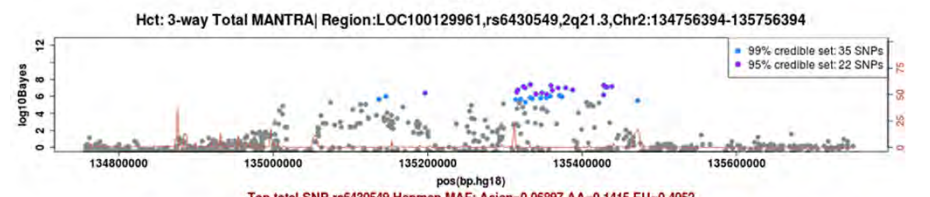

Top total SNP rs6430549 Hapmap MAF: Asian=0.06897, AA=0.1415, EU=0.4052

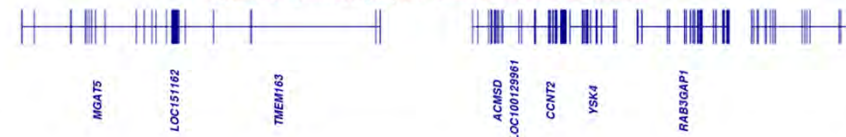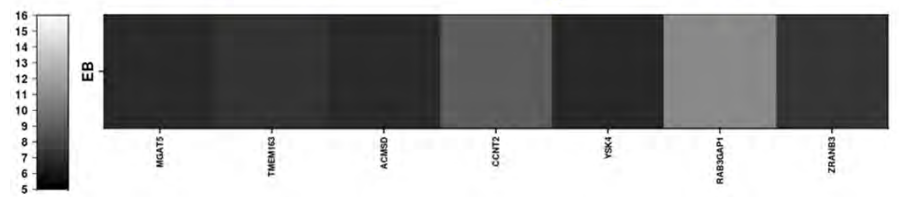

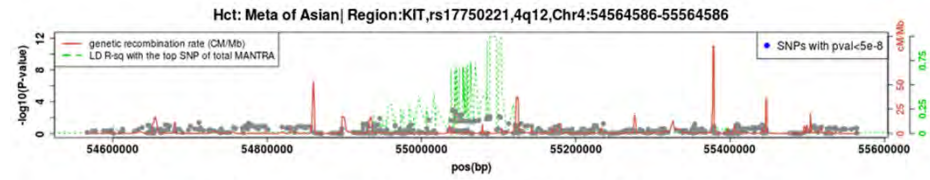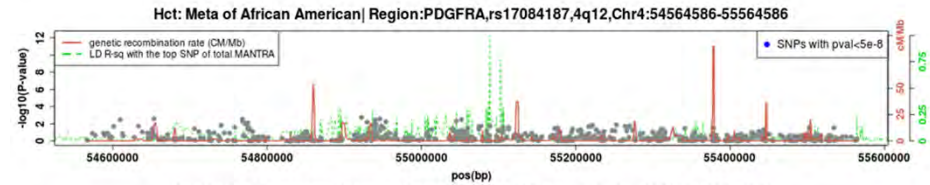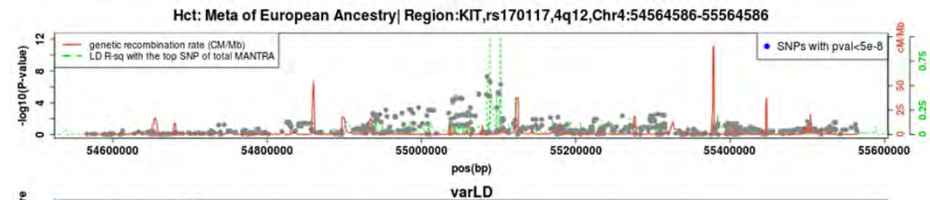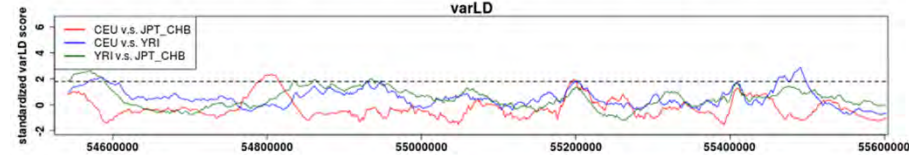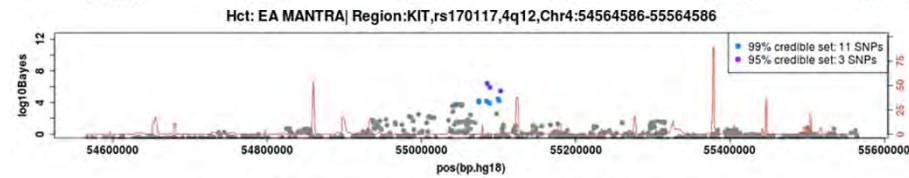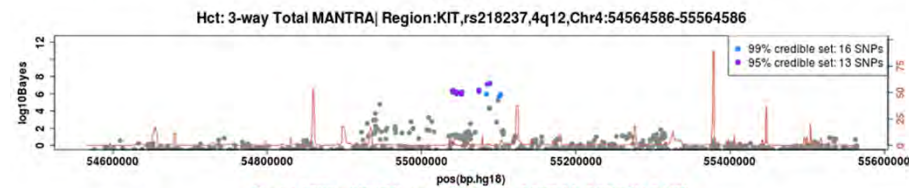

Top total SNP rs218237 Hapmap MAF: Asian=0.3258,AA=0.2712,EU=0.1102

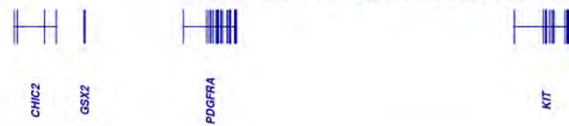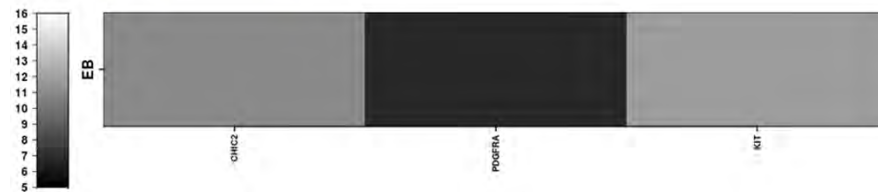

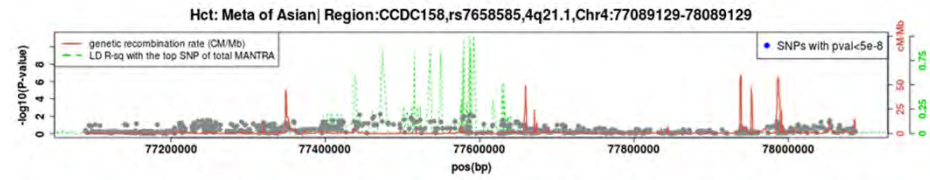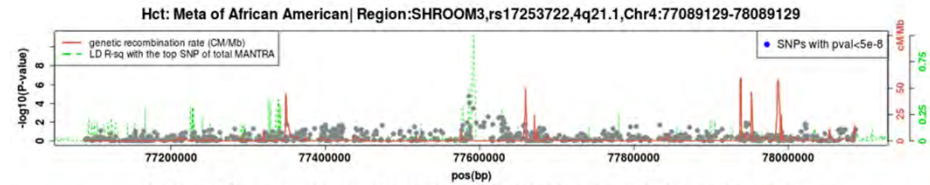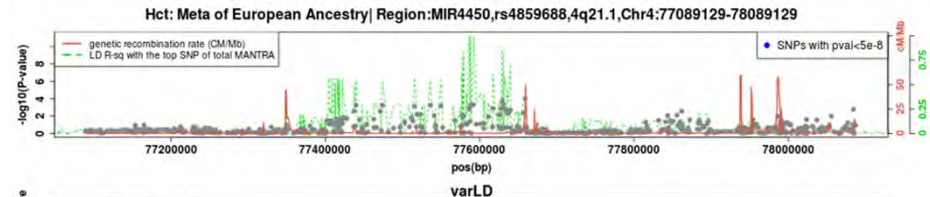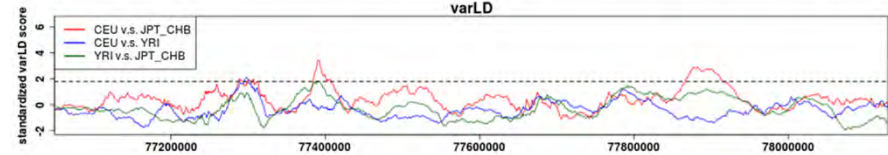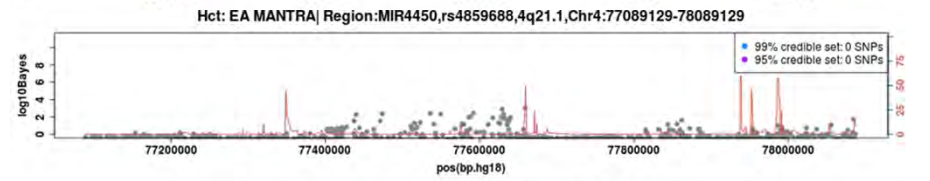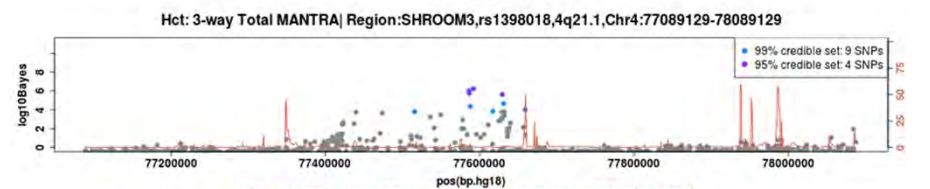

Top total SNP rs1398018 Hapmap MAF: Asian=0.1348, AA=0.06667, EU=0.4667

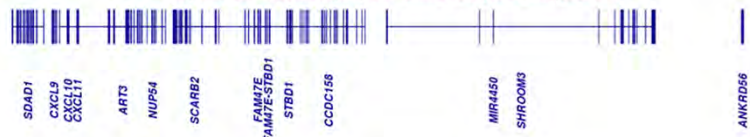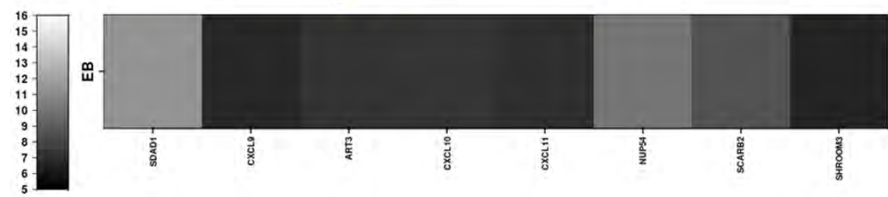

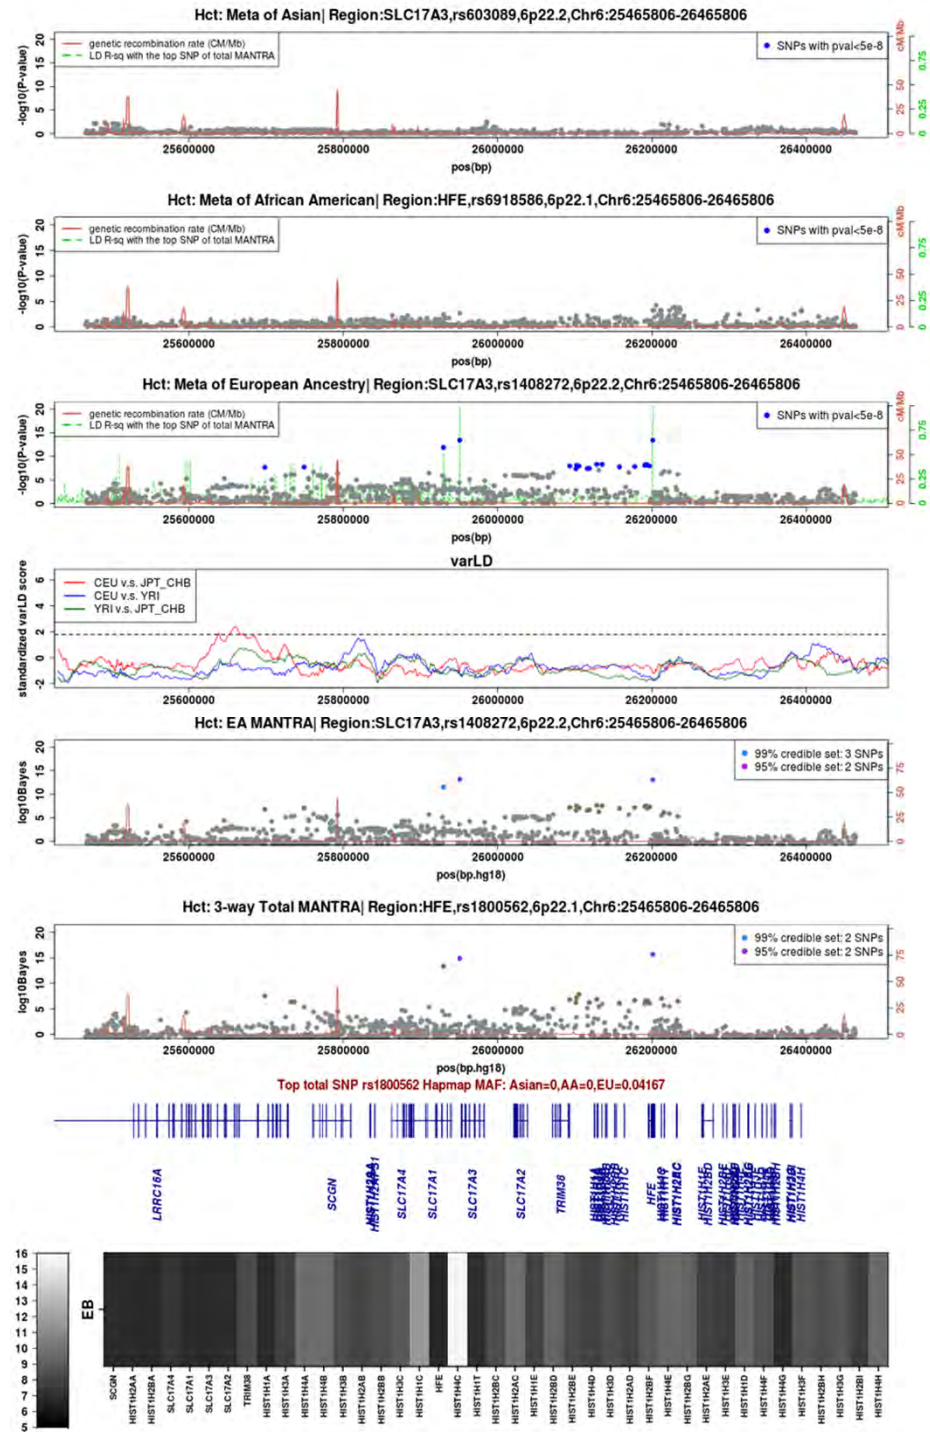

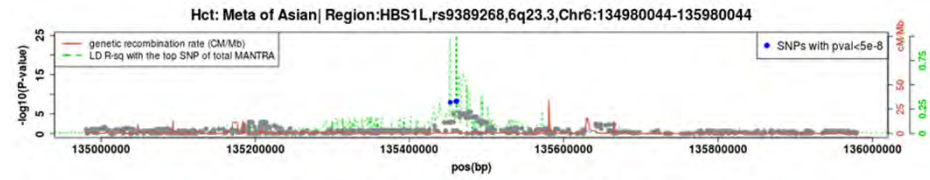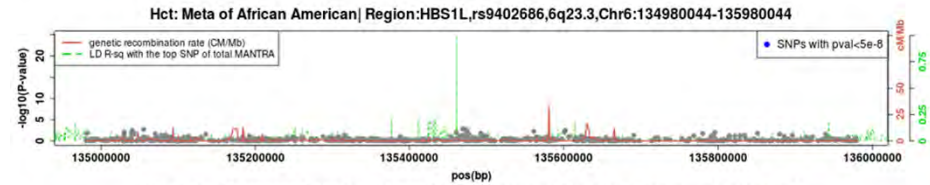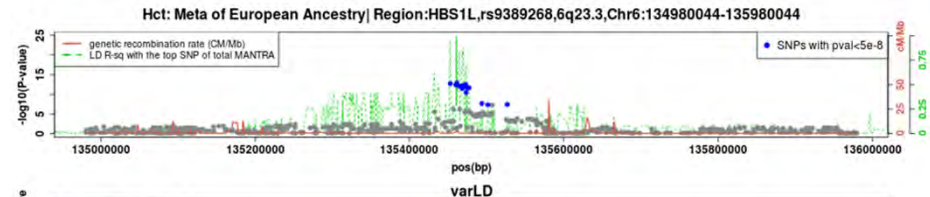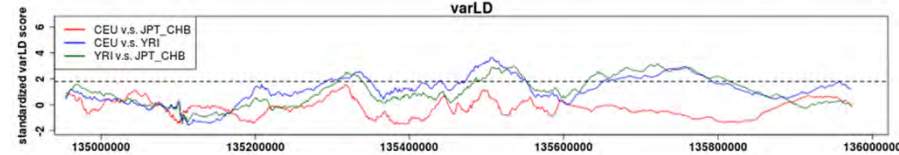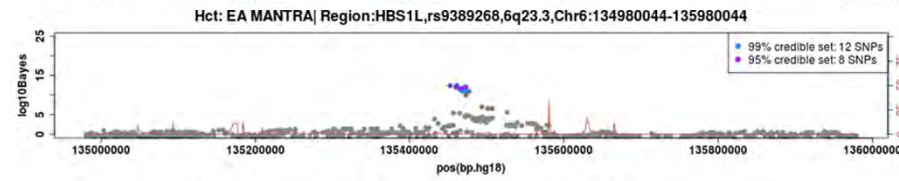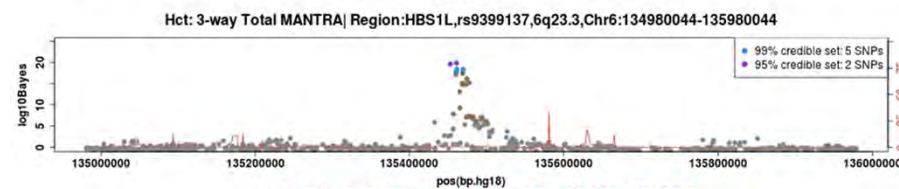

Top total SNP rs9399137 Hapmap MAF: Asian=0.3202, AA=0.04167, EU=0.225

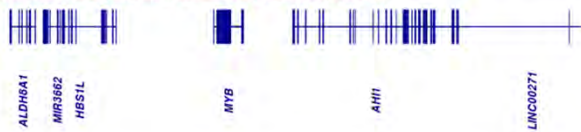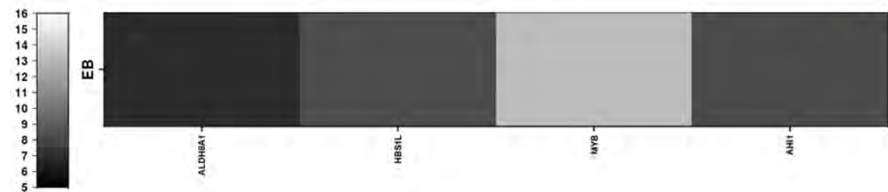



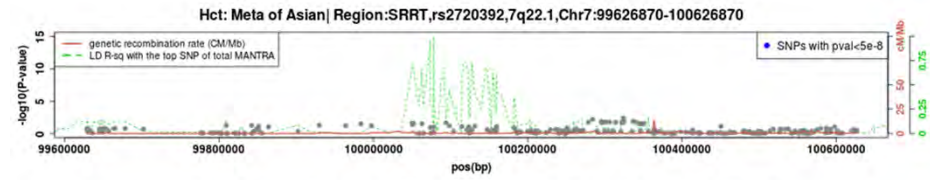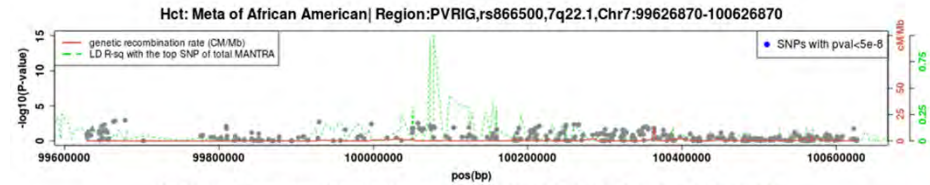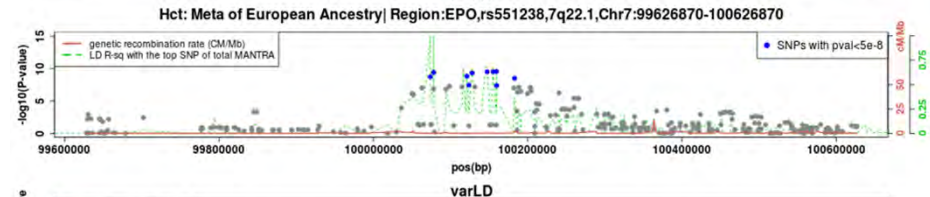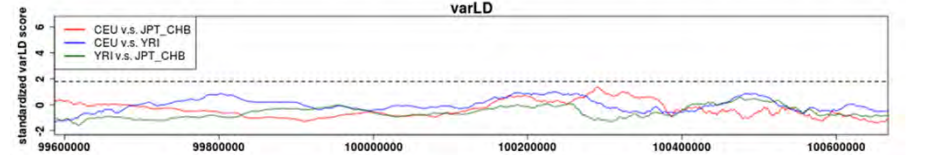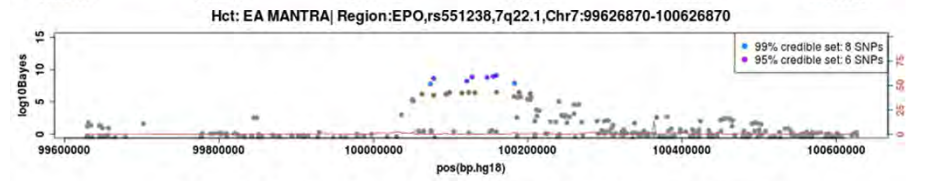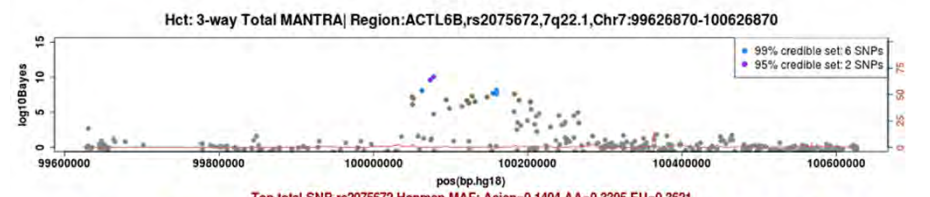

Top total SNP rs2075672 Hapmap MAF: Asian=0.1404, AA=0.3305, EU=0.3621

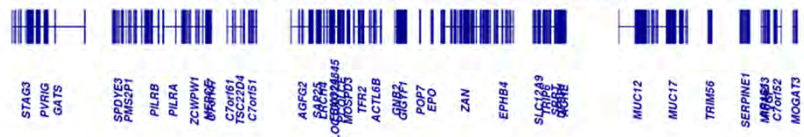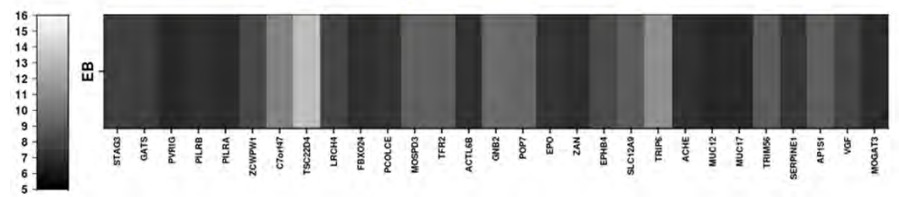

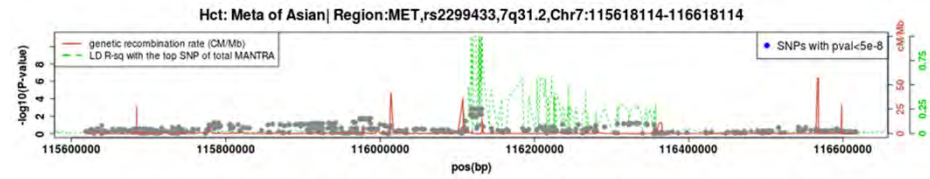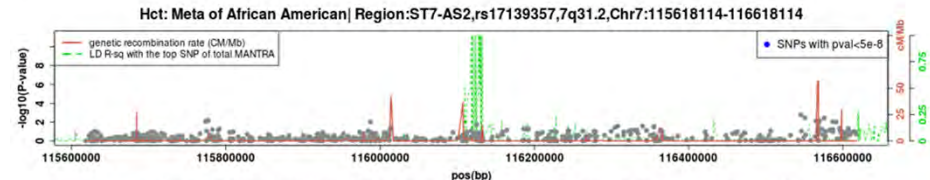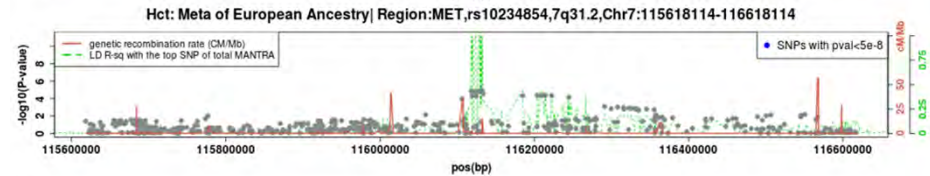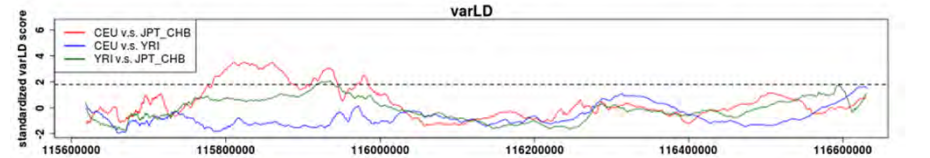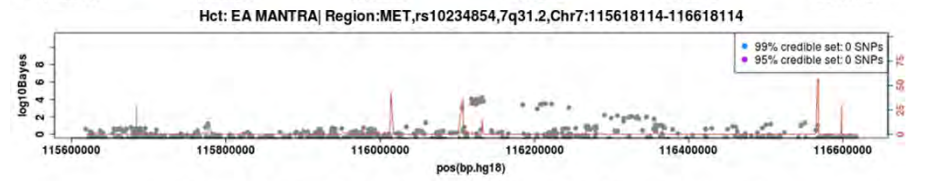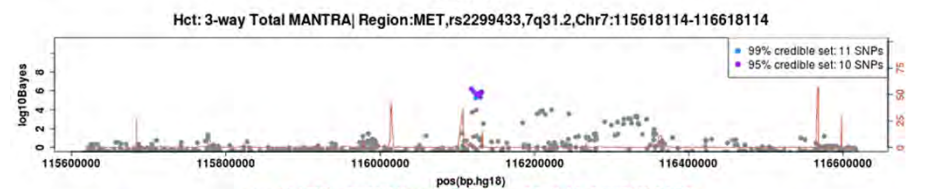

Top total SNP rs2299433 Hapmap MAF: Asian=0.2921, AA=0.1017, EU=0.2018

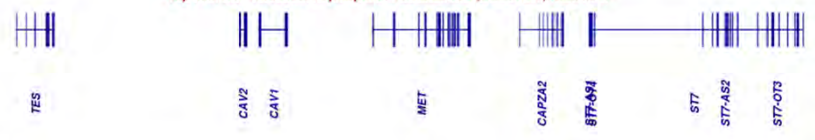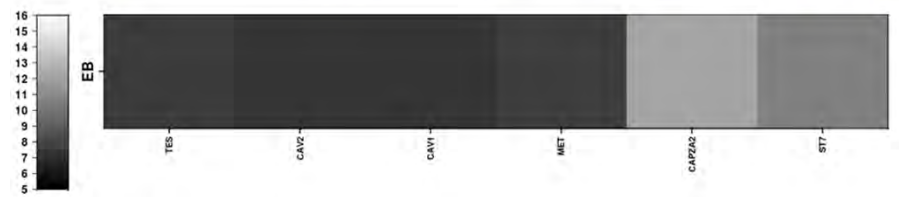

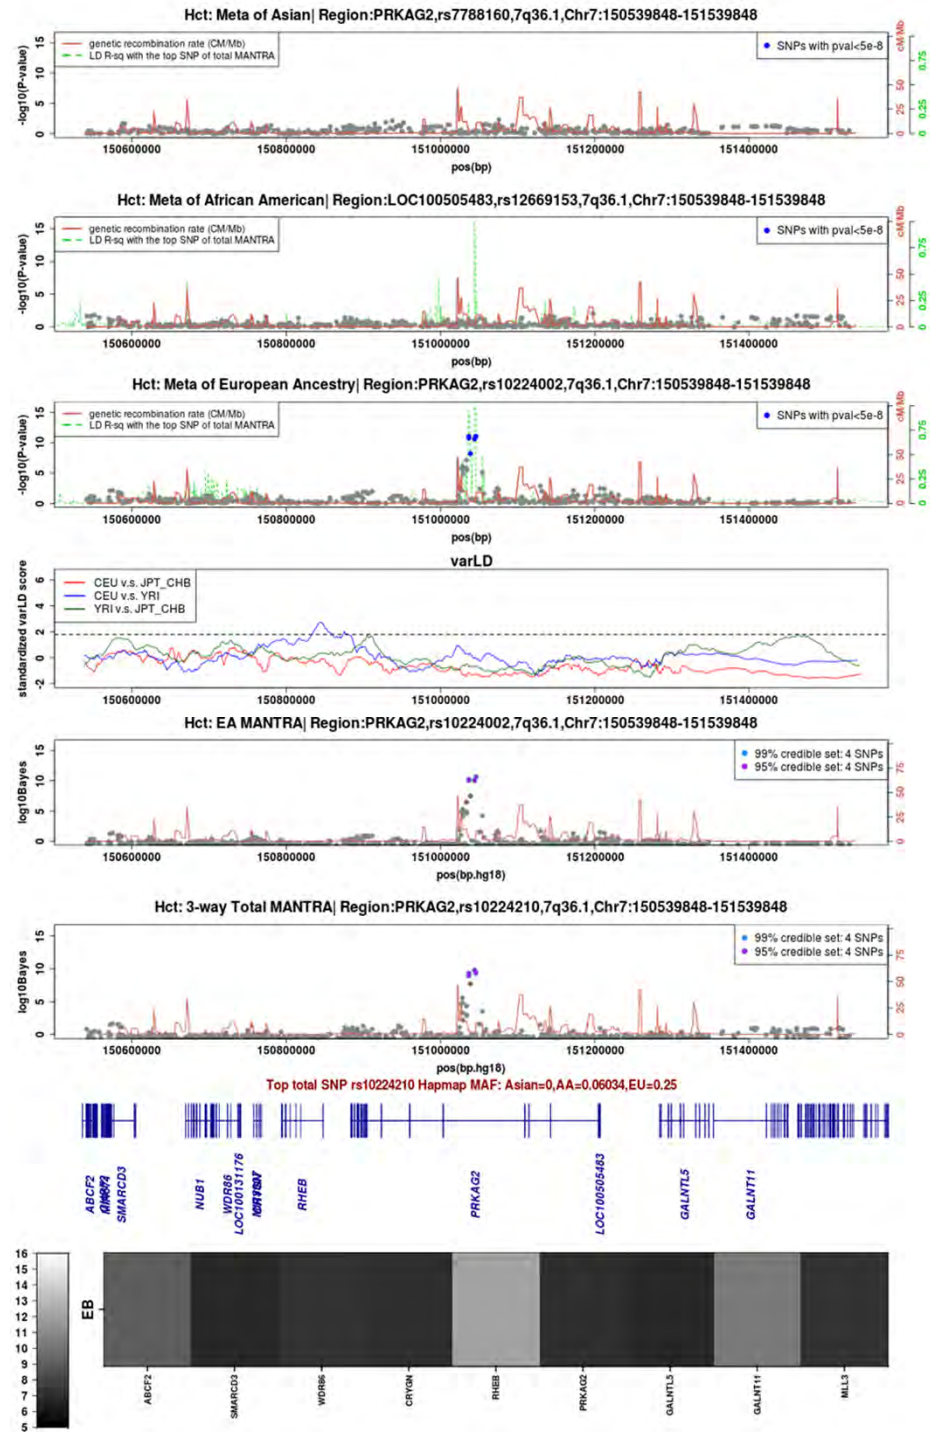

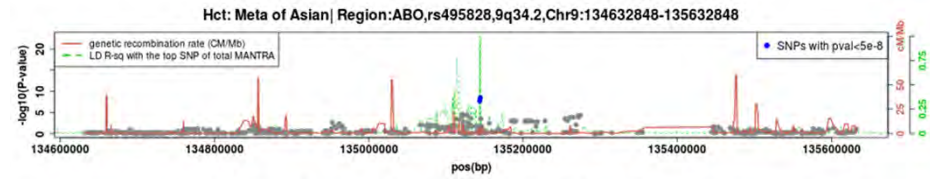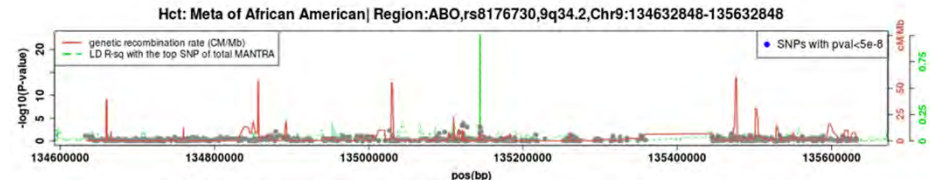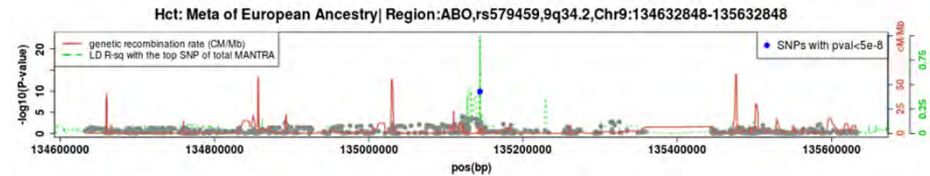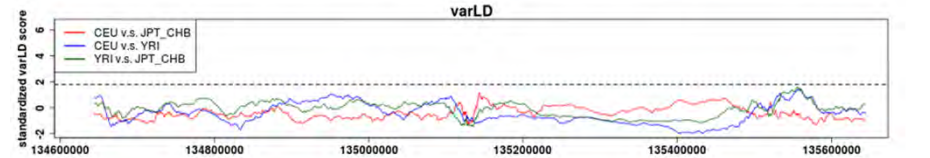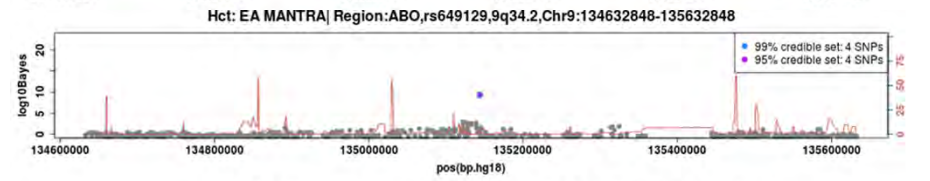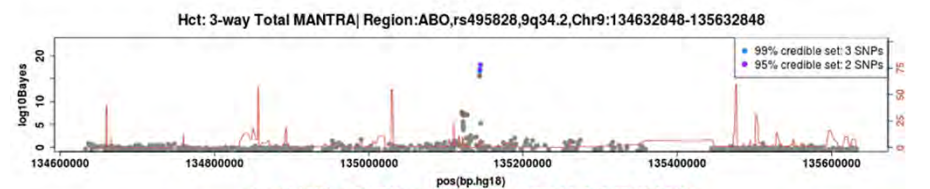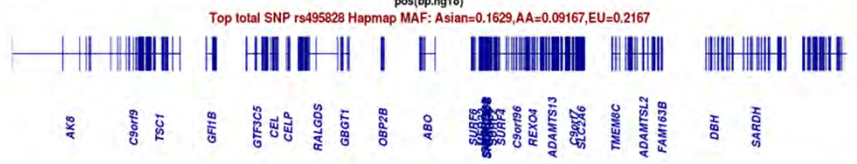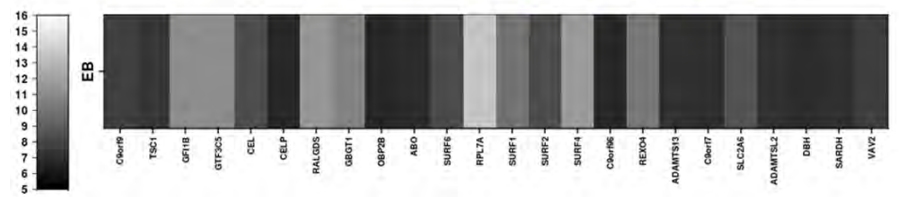

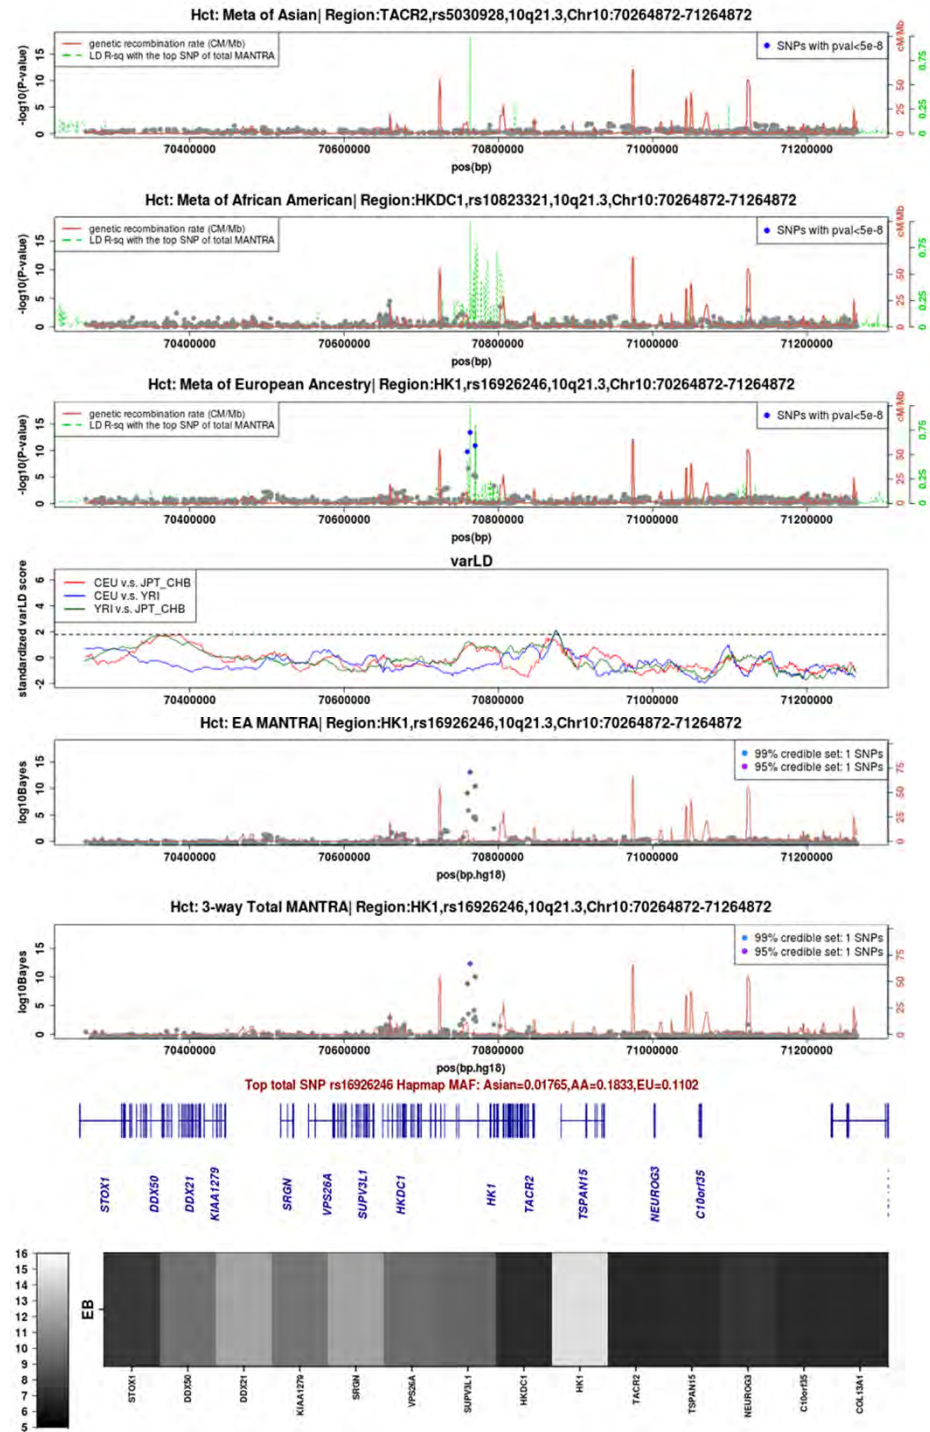

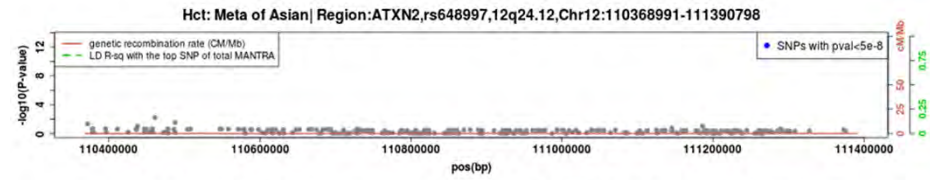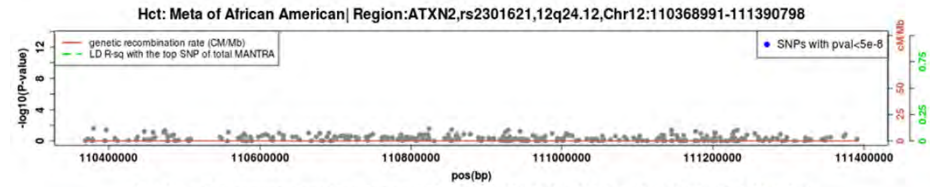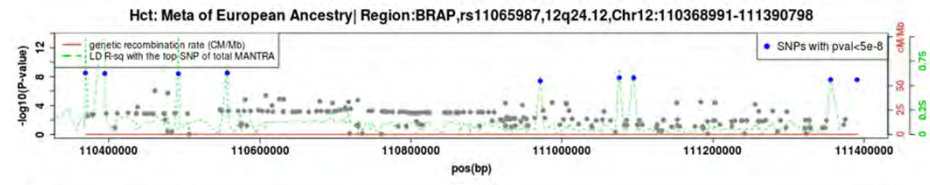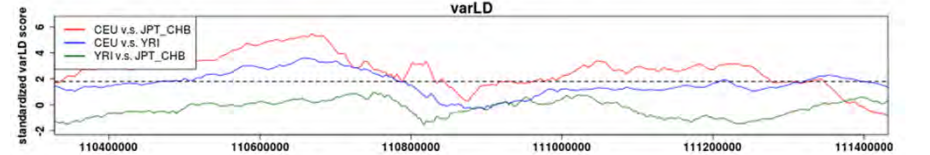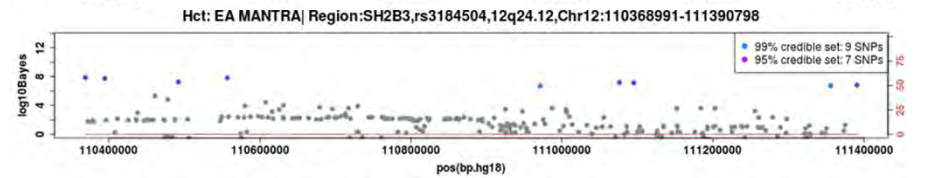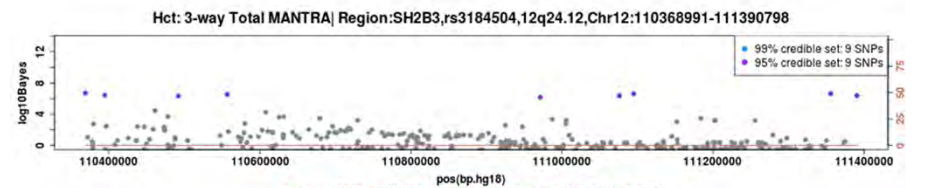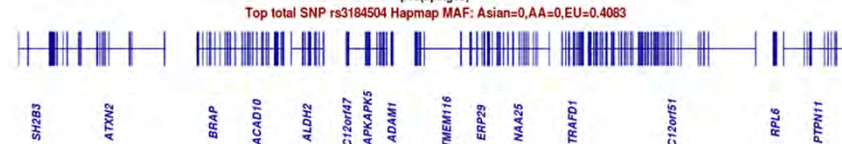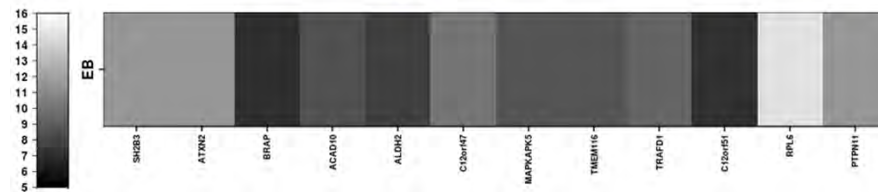

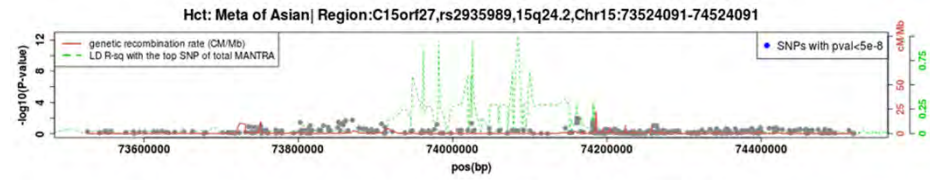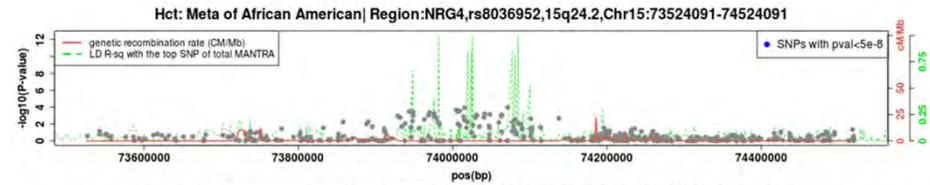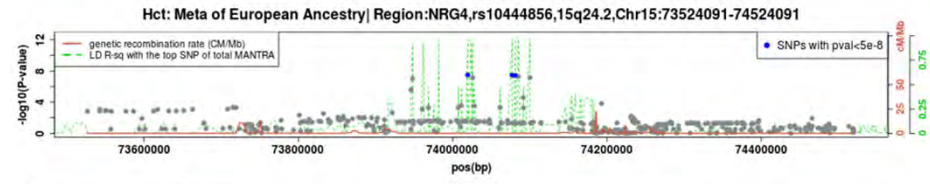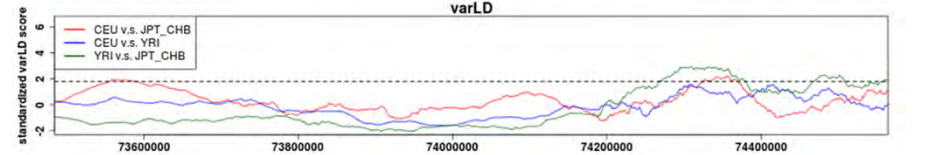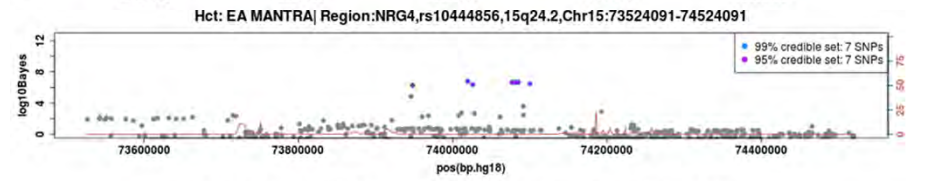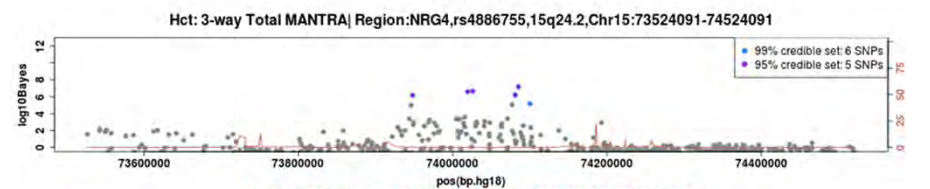

Top total SNP rs4886755 Hapmap MAF: Asian=0.4444,AA=0.2167,EU=0.4917

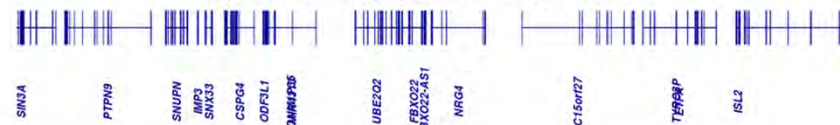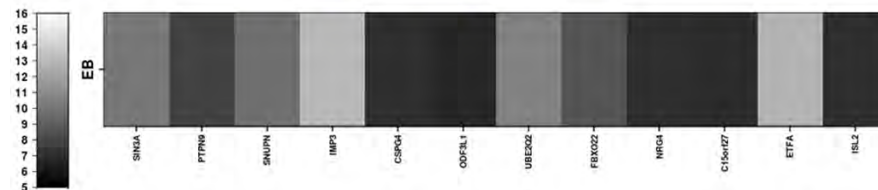

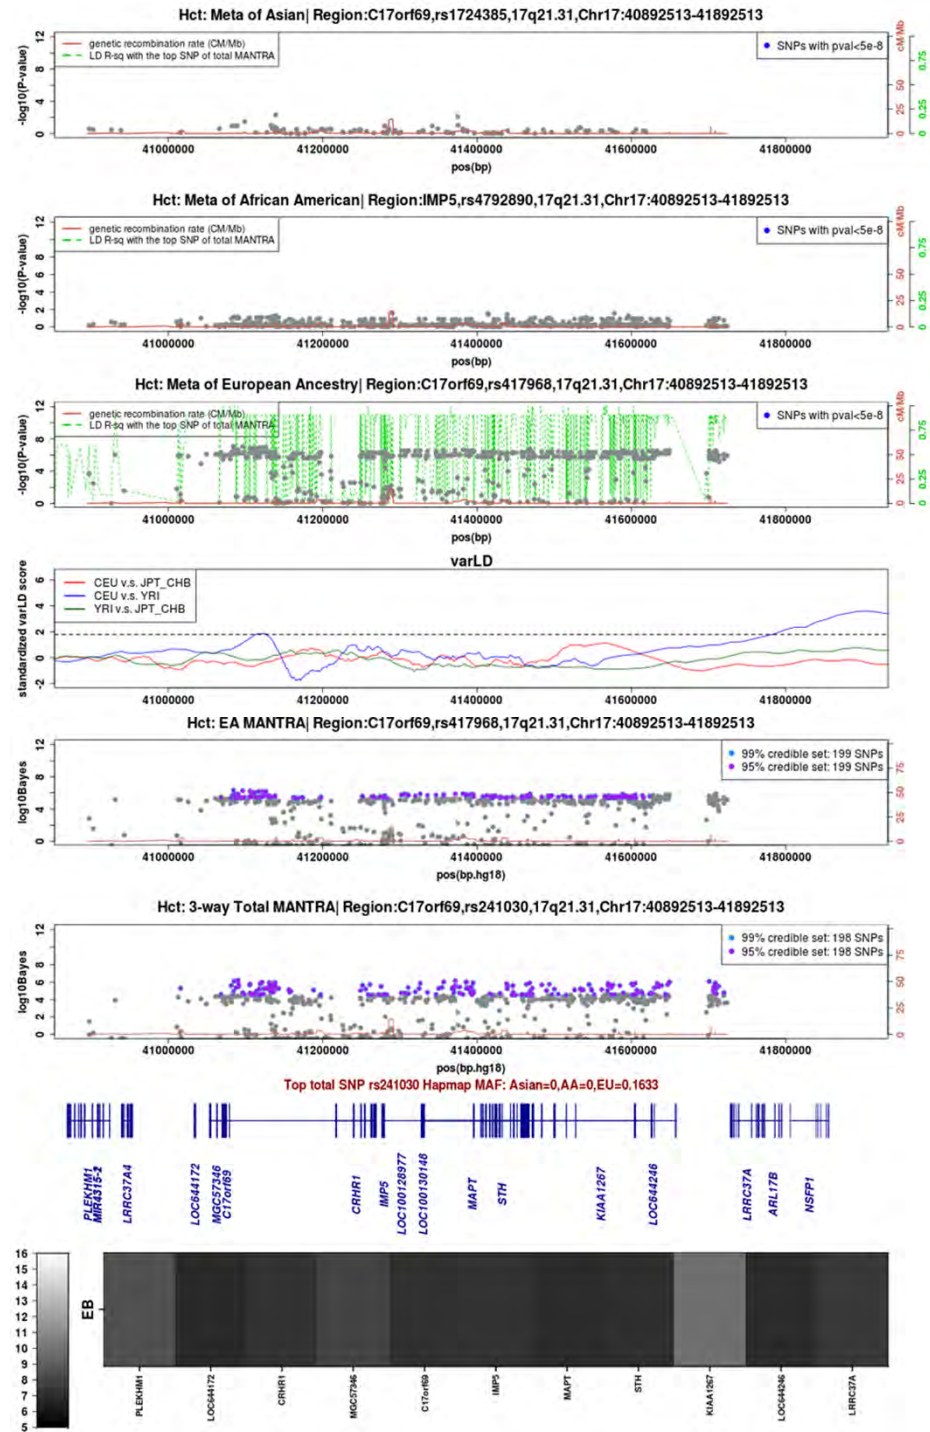



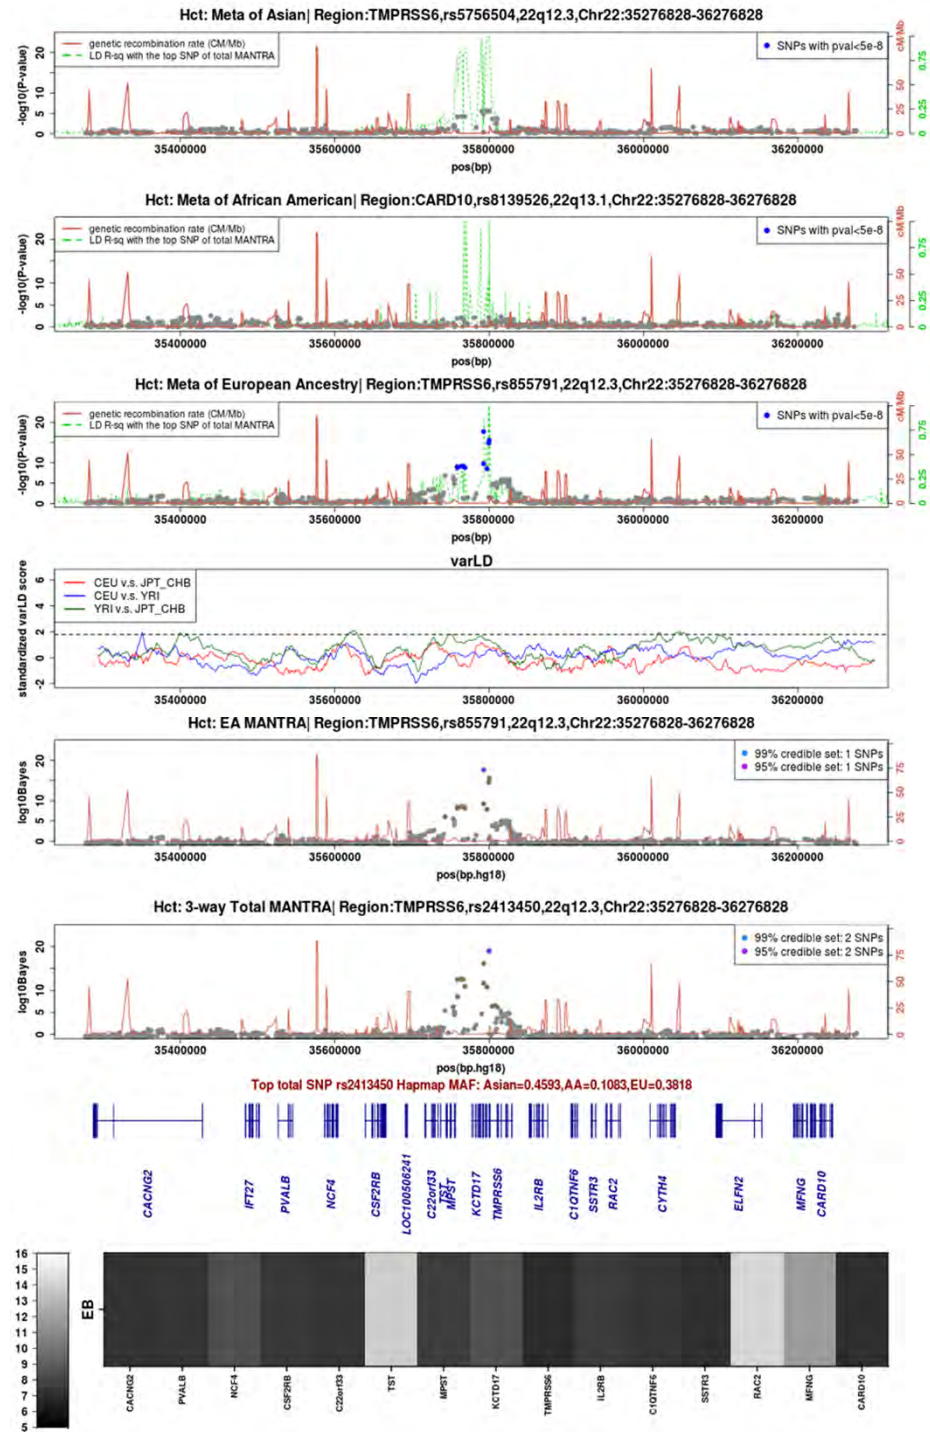

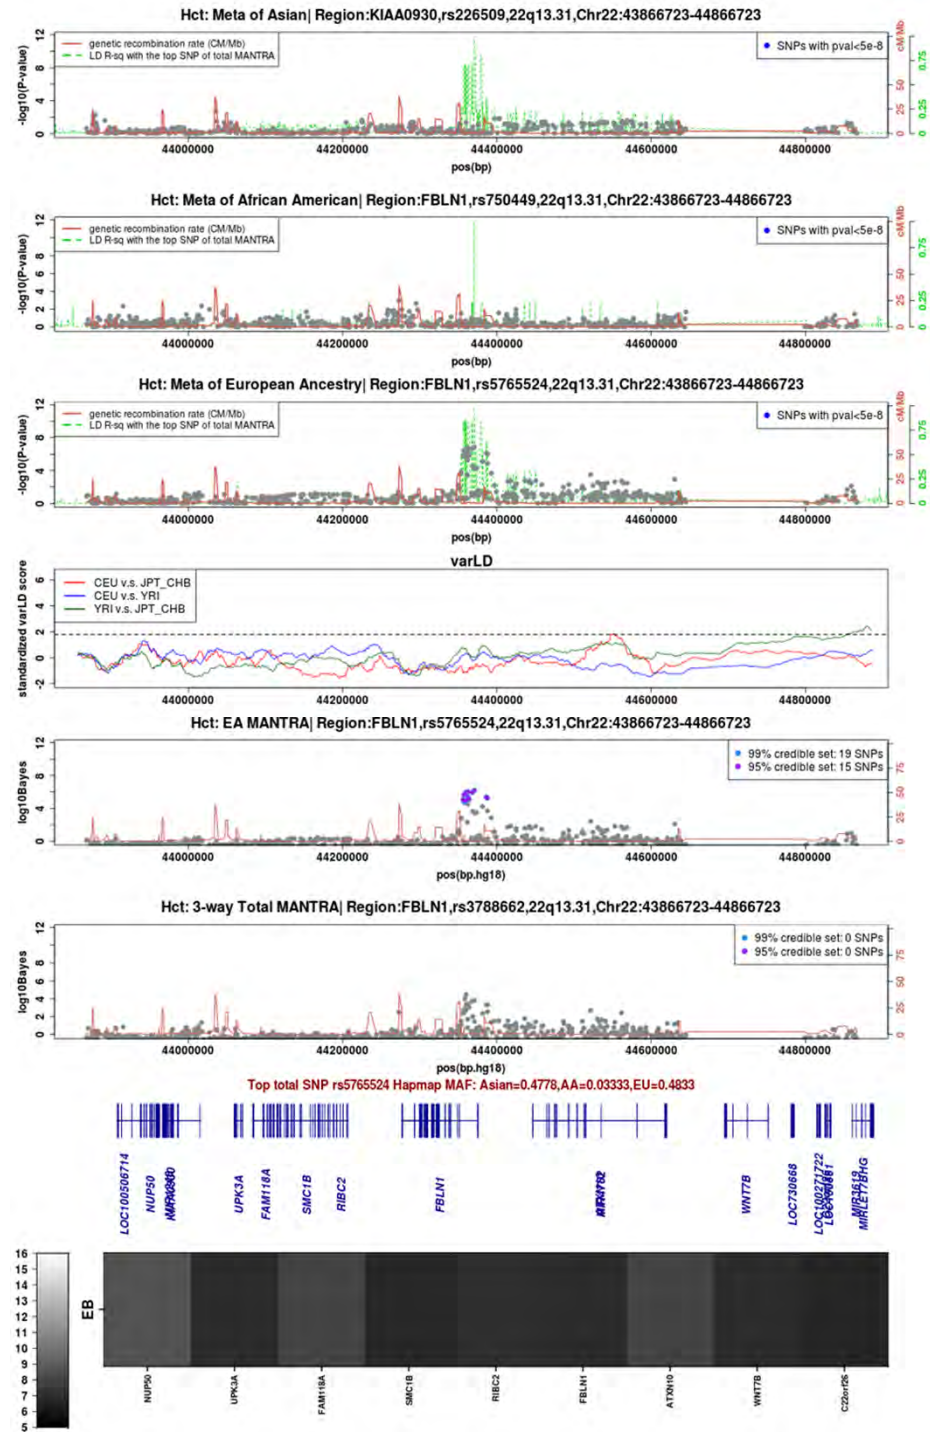

Hb

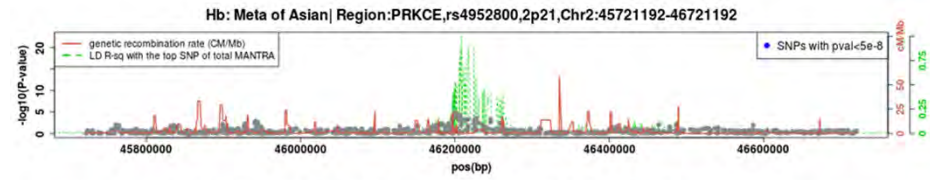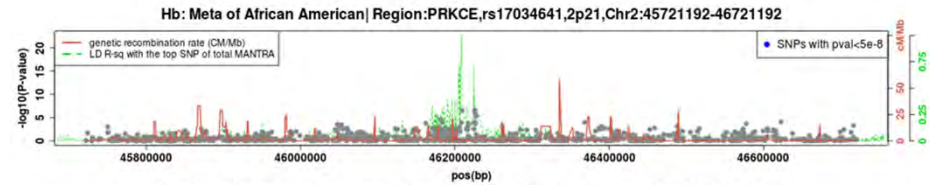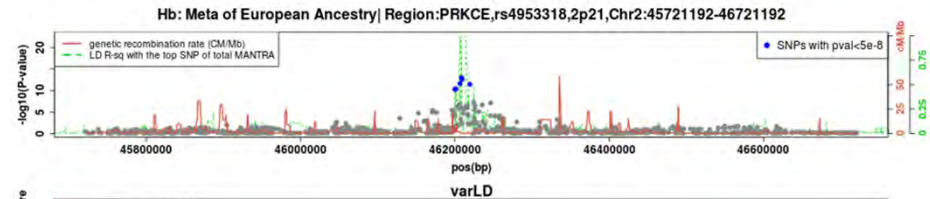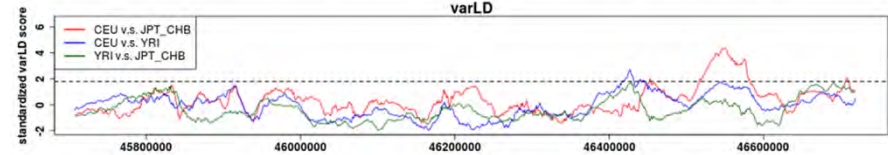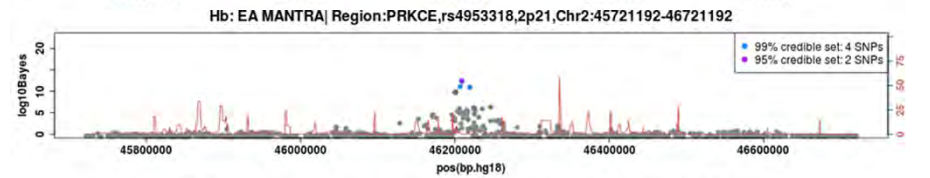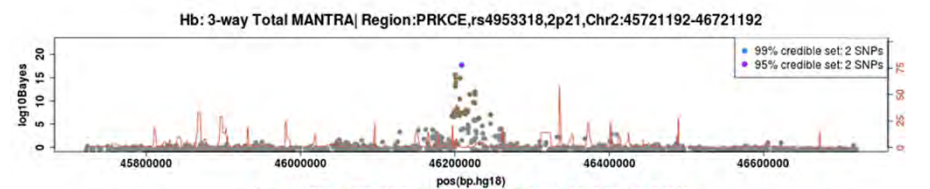

Top total SNP rs4953318 Hapmap MAF: Asian=0.2222, AA=0.375, EU=0.3417

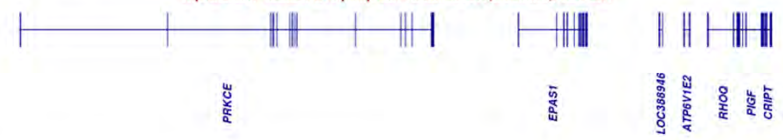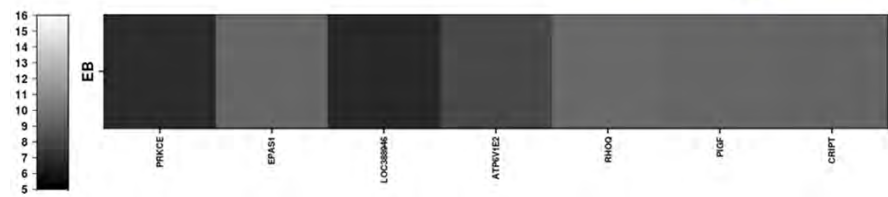

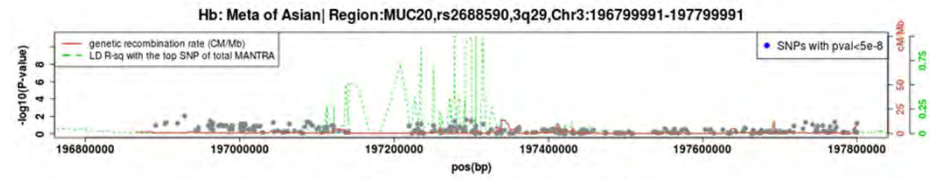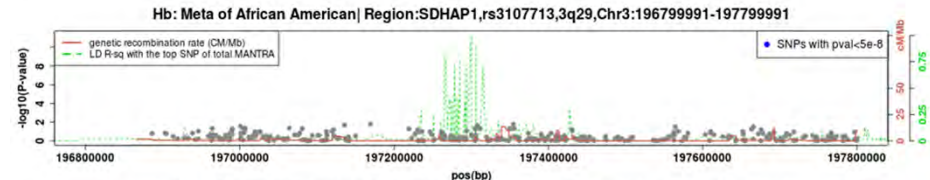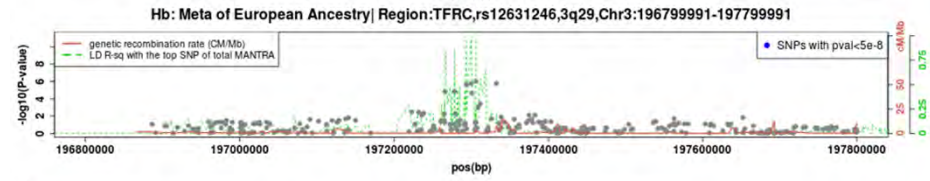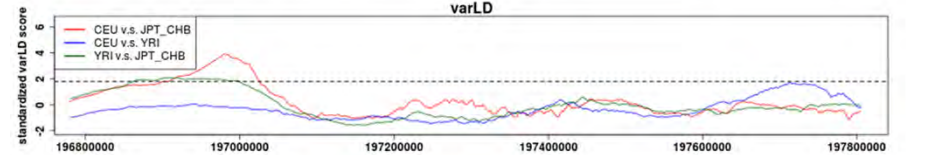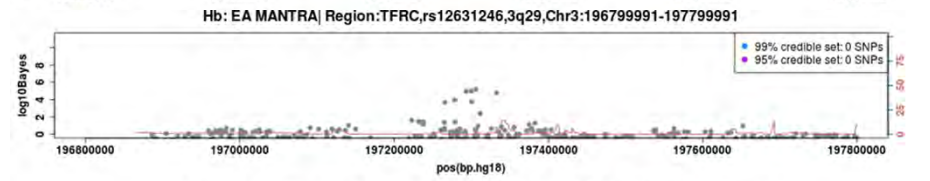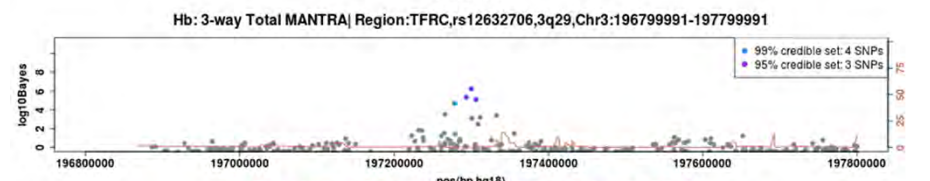

Top total SNP rs12632706 Hapmap MAF: Asian=0.07303,AA=0.1,EU=0.4107

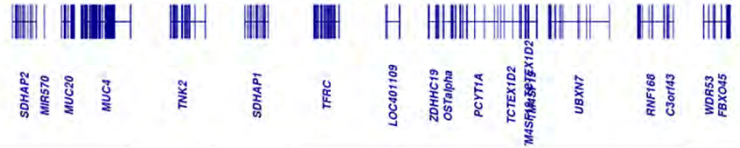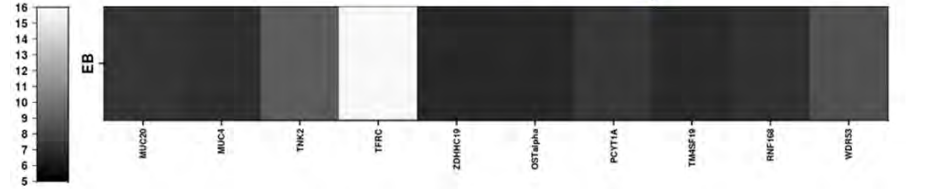

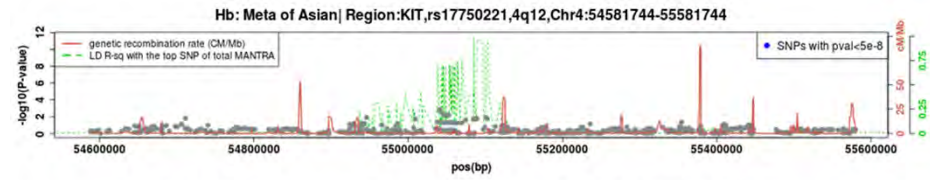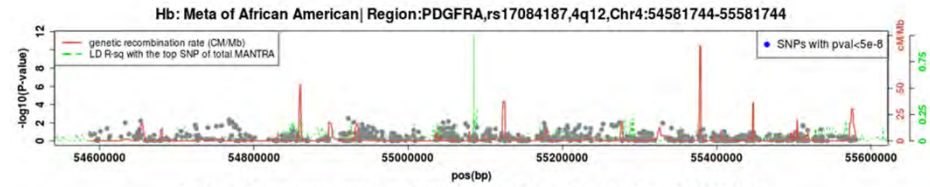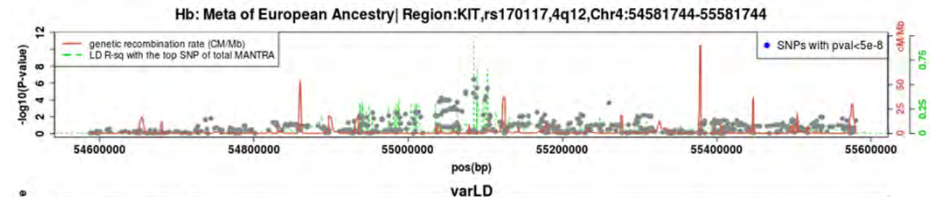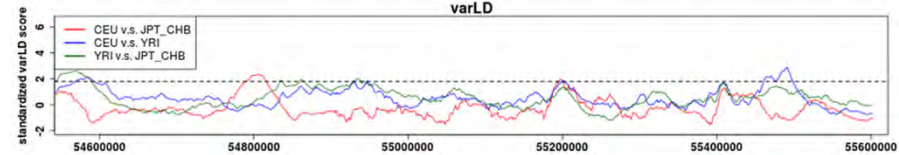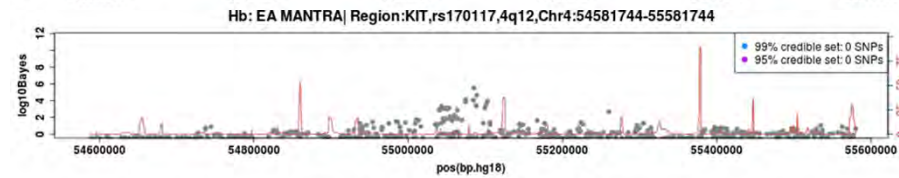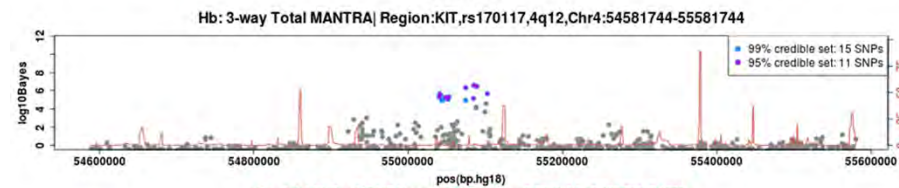

Top total SNP rs170117 Hapmap MAF: Asian=0.3258, AA=0.125, EU=0.1333

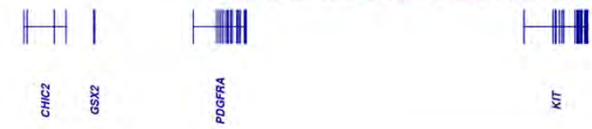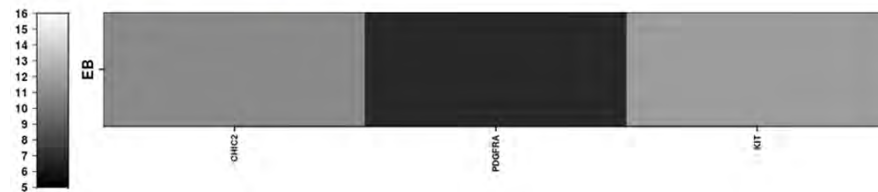

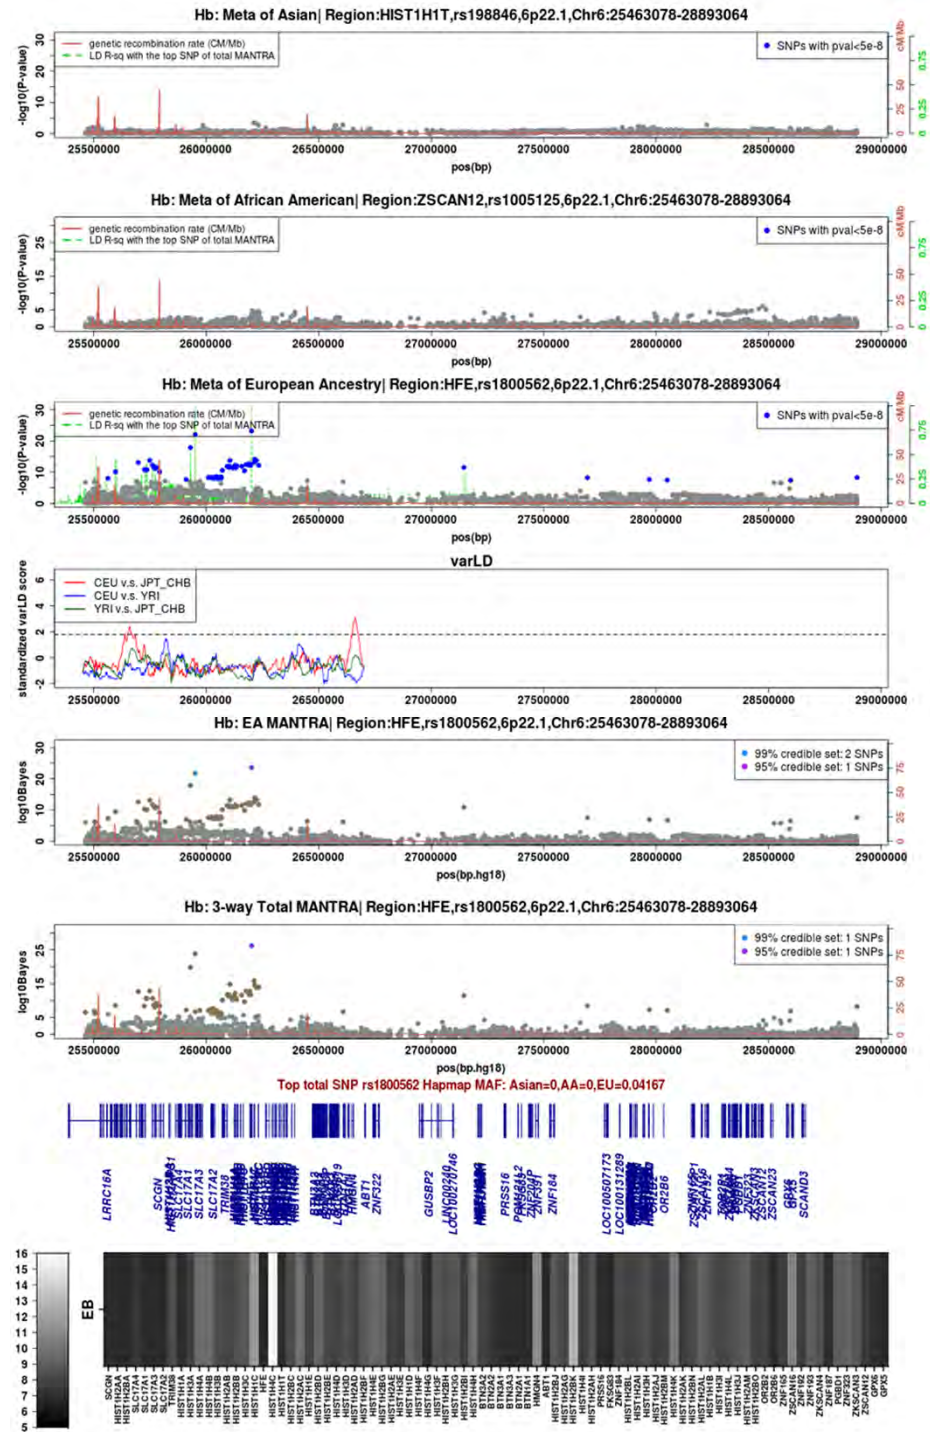

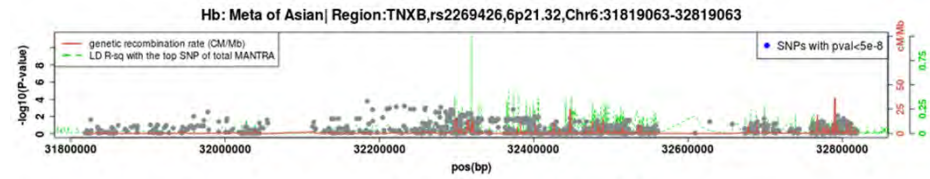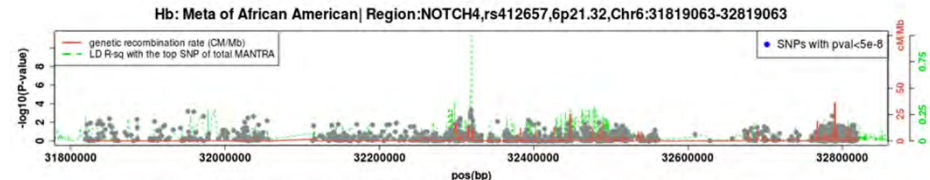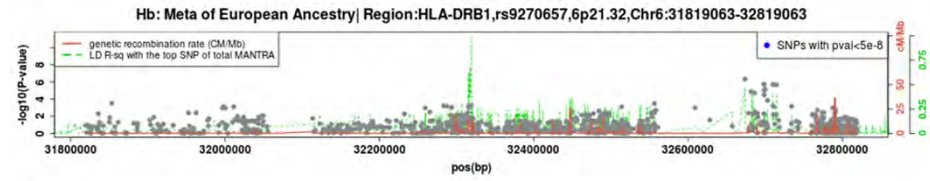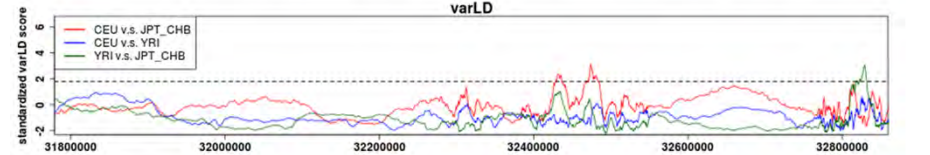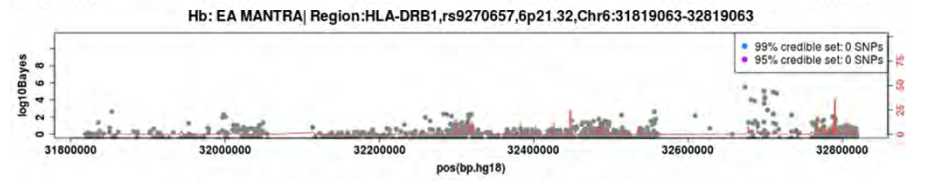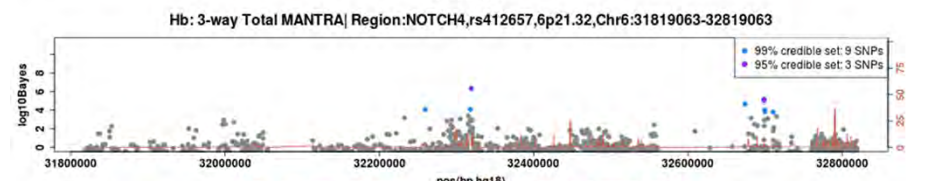

Top total SNP rs412657 Hapmap MAF: Asian=0.2644,AA=0.2685,EU=0.2542

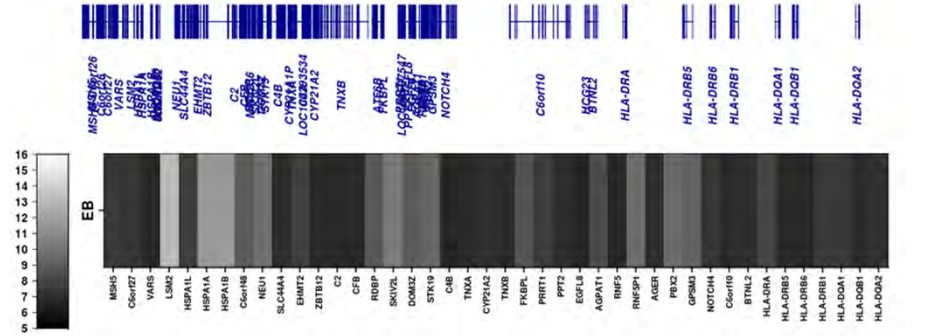



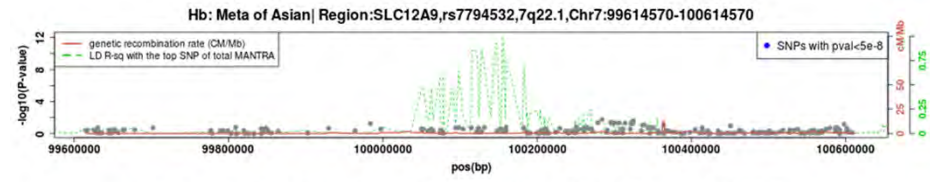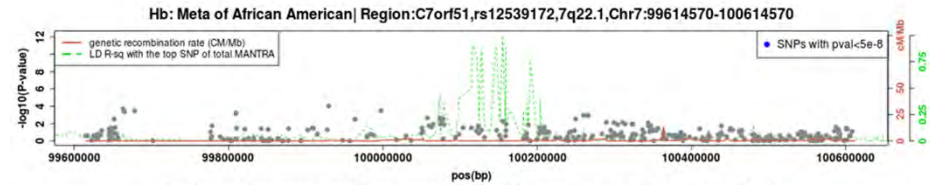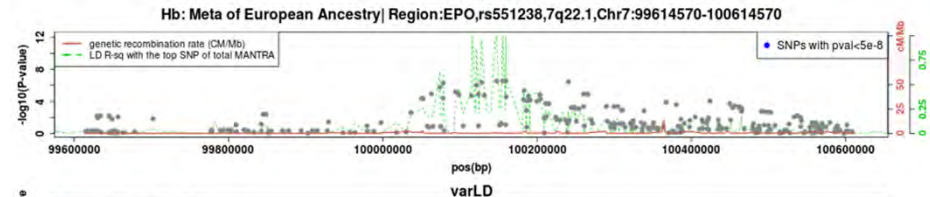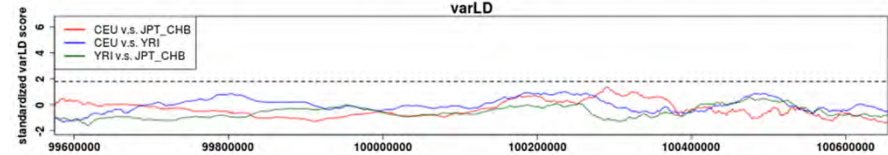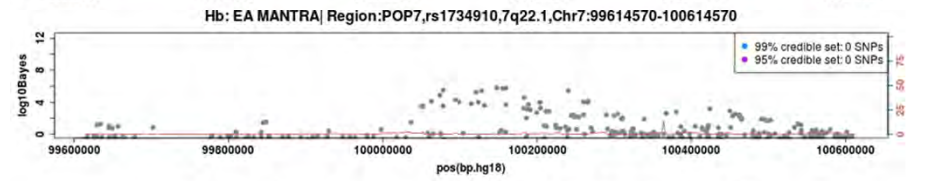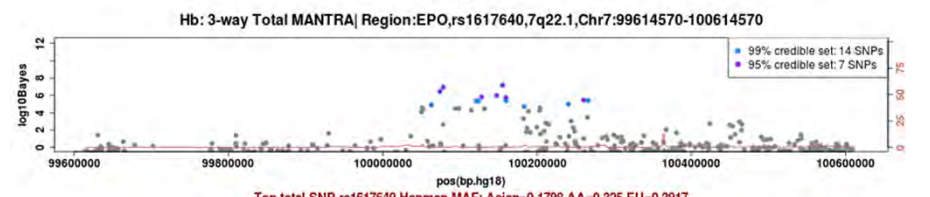

Top total SNP rs1617640 Hapmap MAF: Asian=0.1798, AA=0.325, EU=0.3917

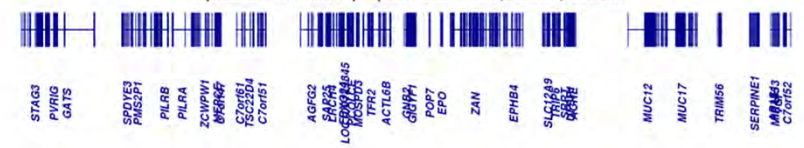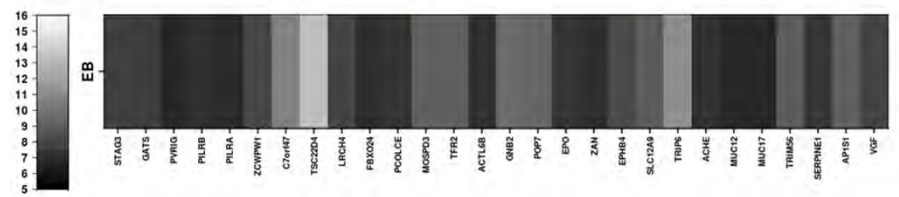

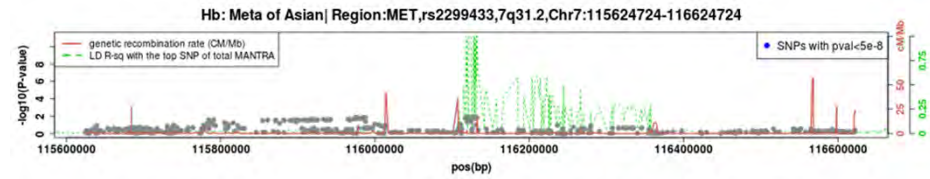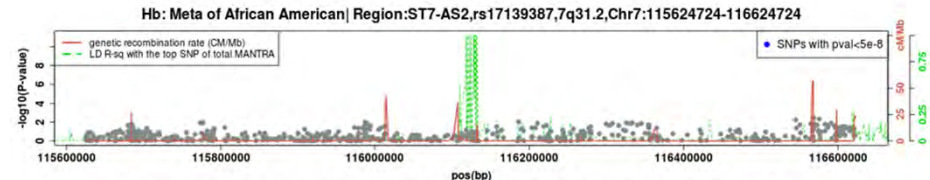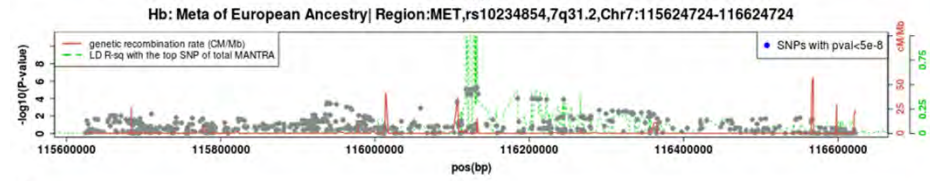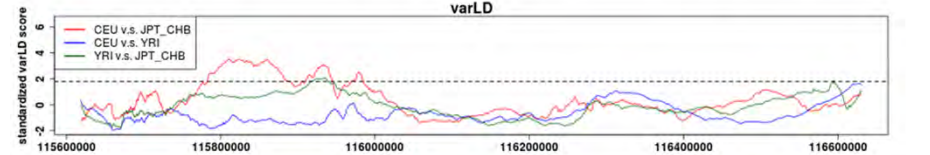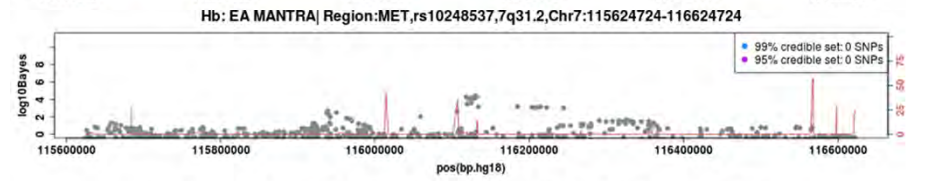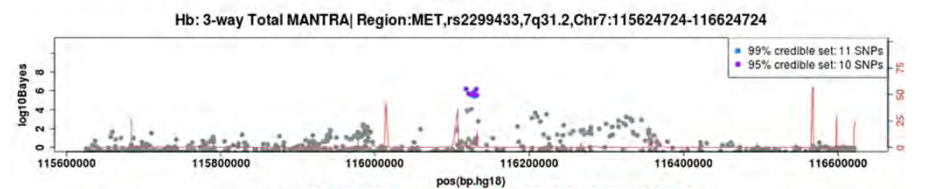

Top total SNP rs2299433 Hapmap MAF: Asian=0.2921, AA=0.1017, EU=0.2018

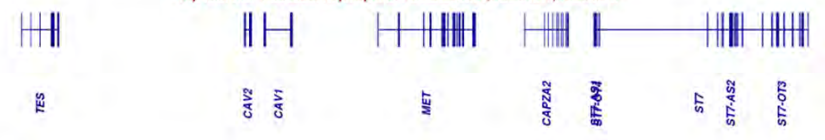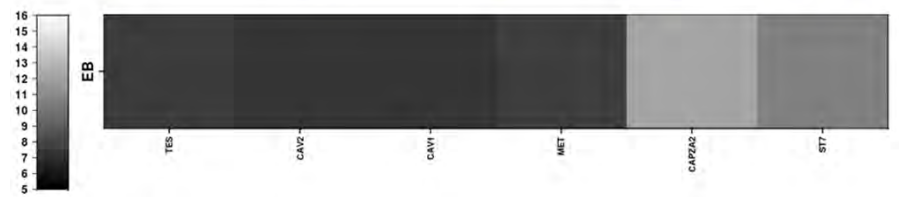

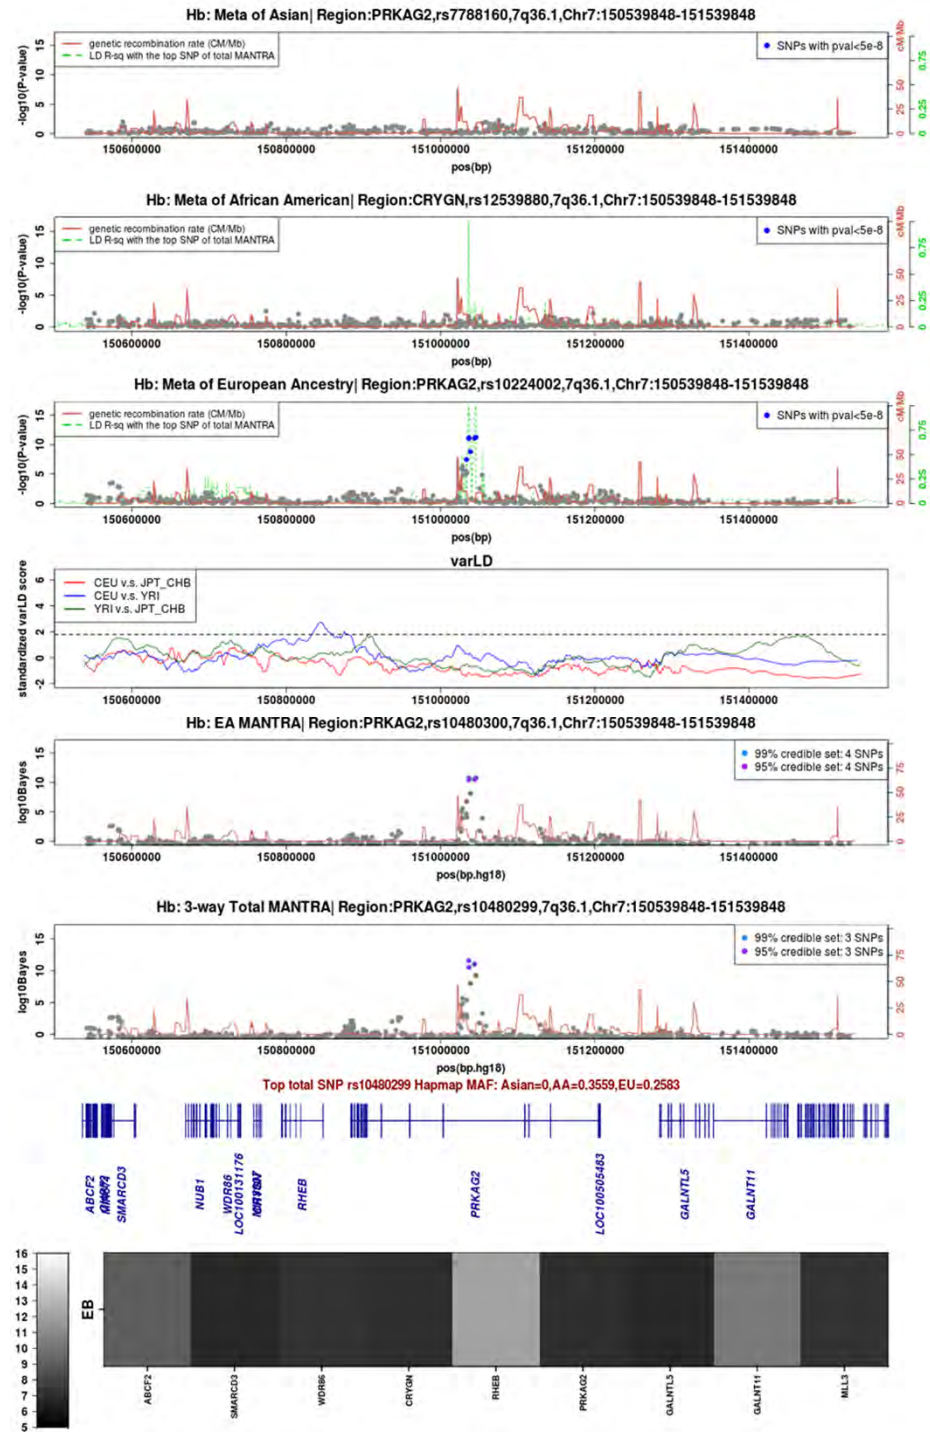

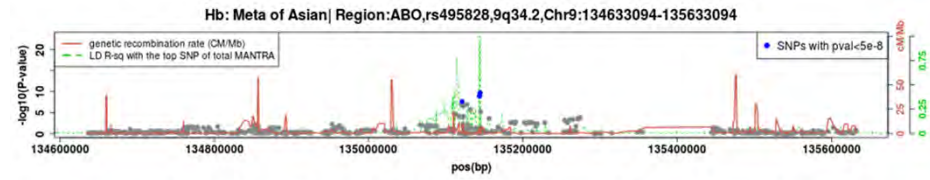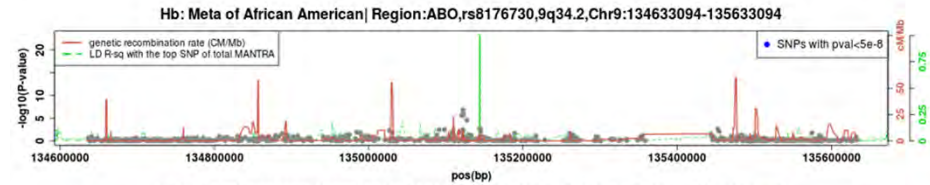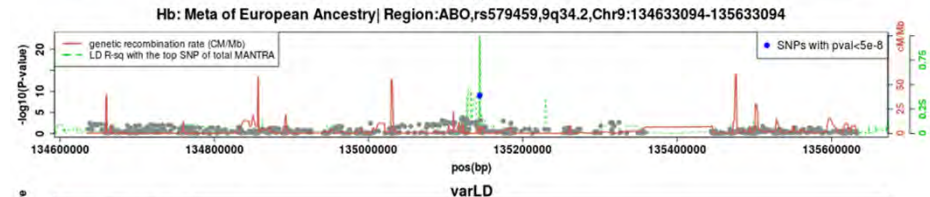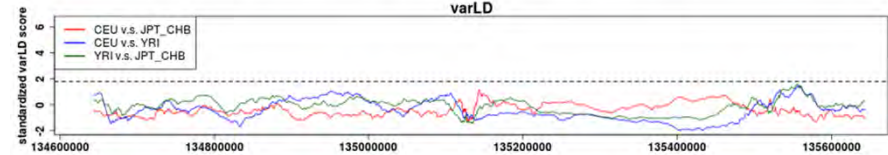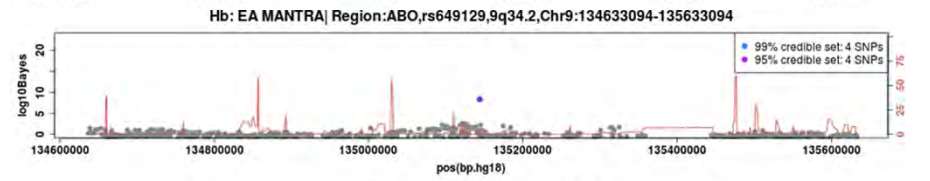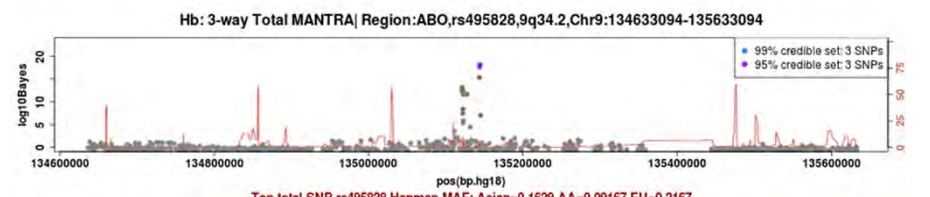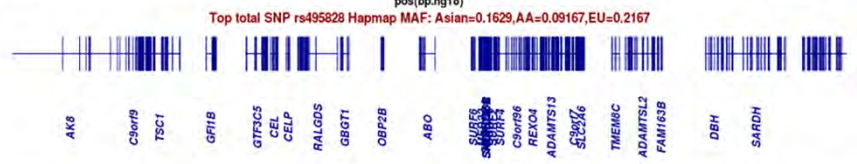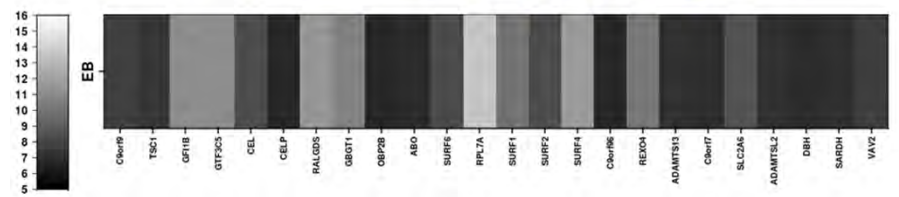

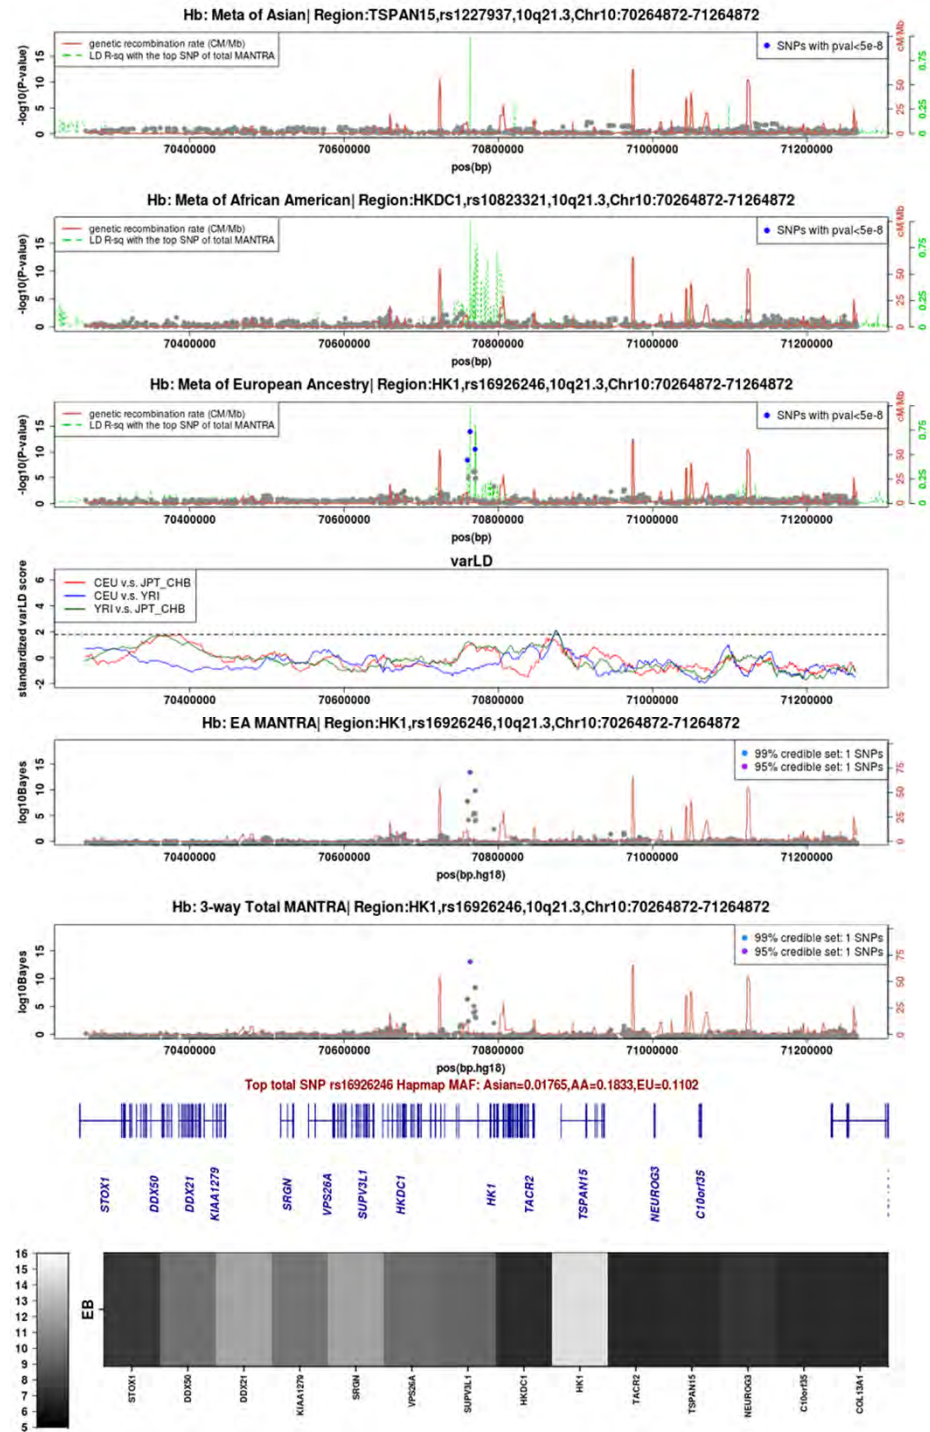

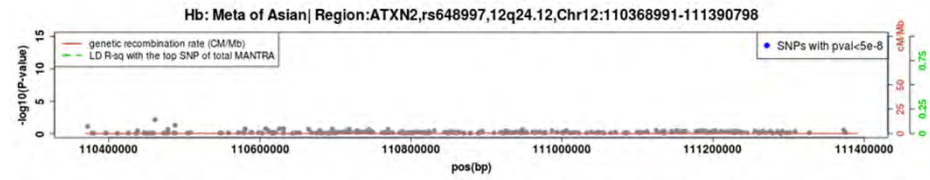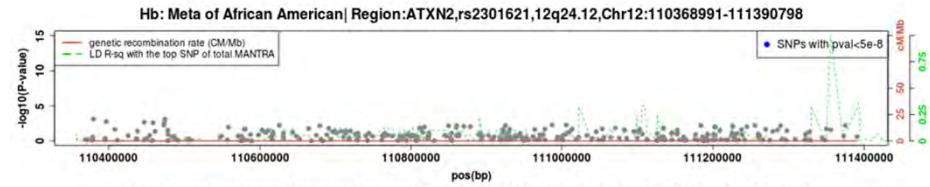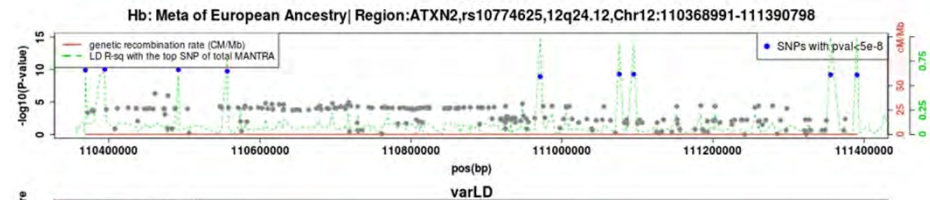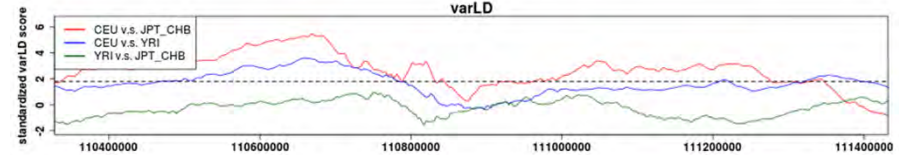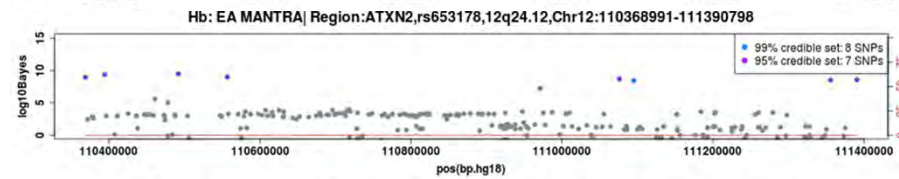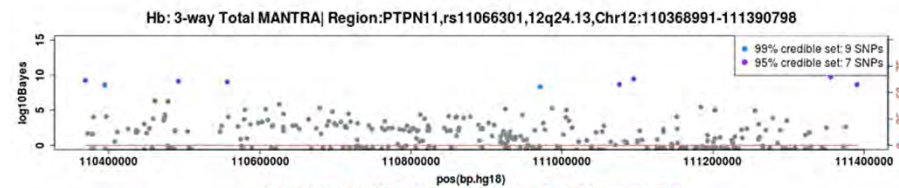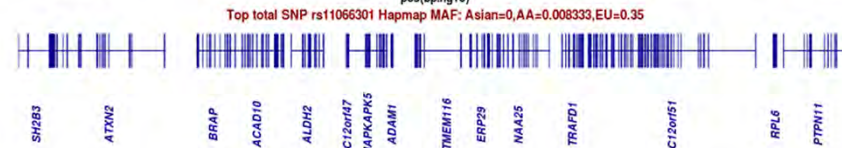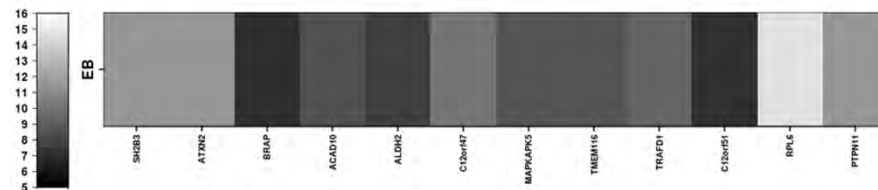

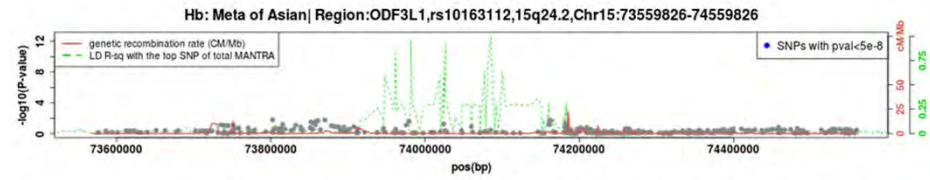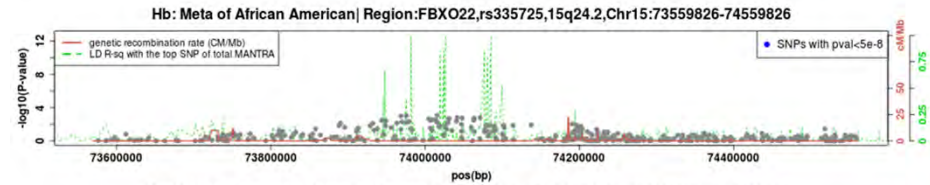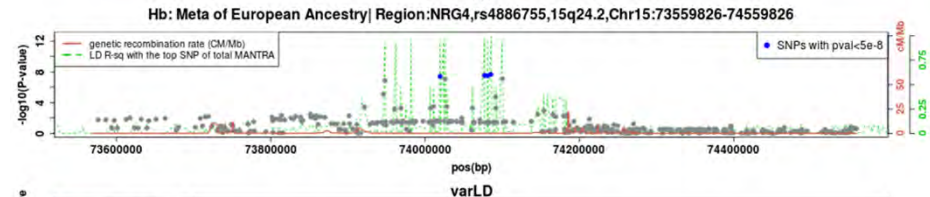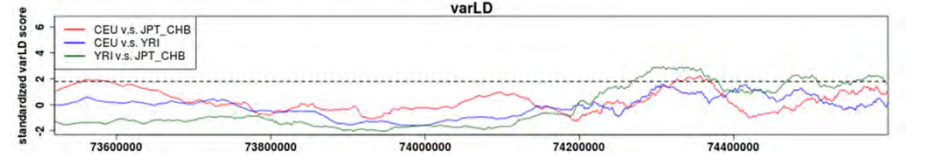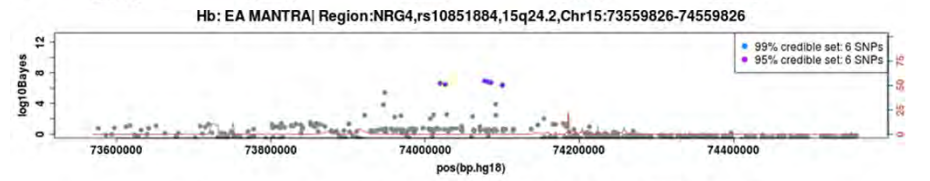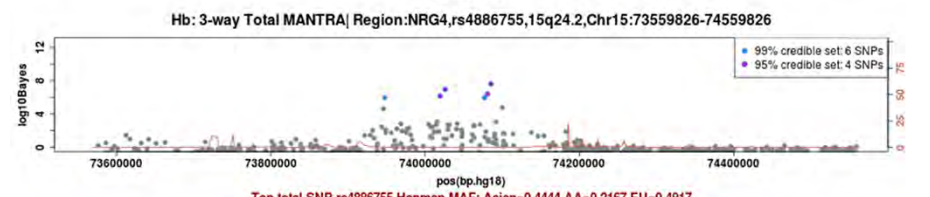

Top total SNP rs4886755 Hapmap MAF: Asian=0.4444, AA=0.2167, EU=0.4917

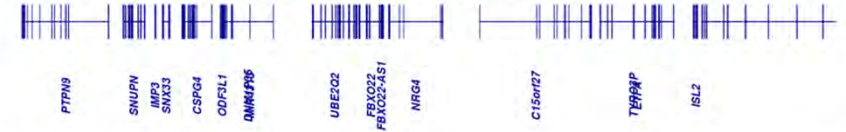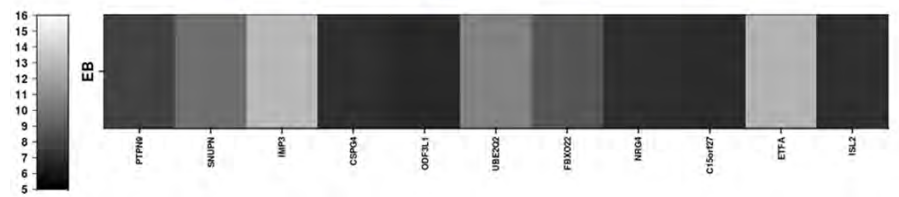

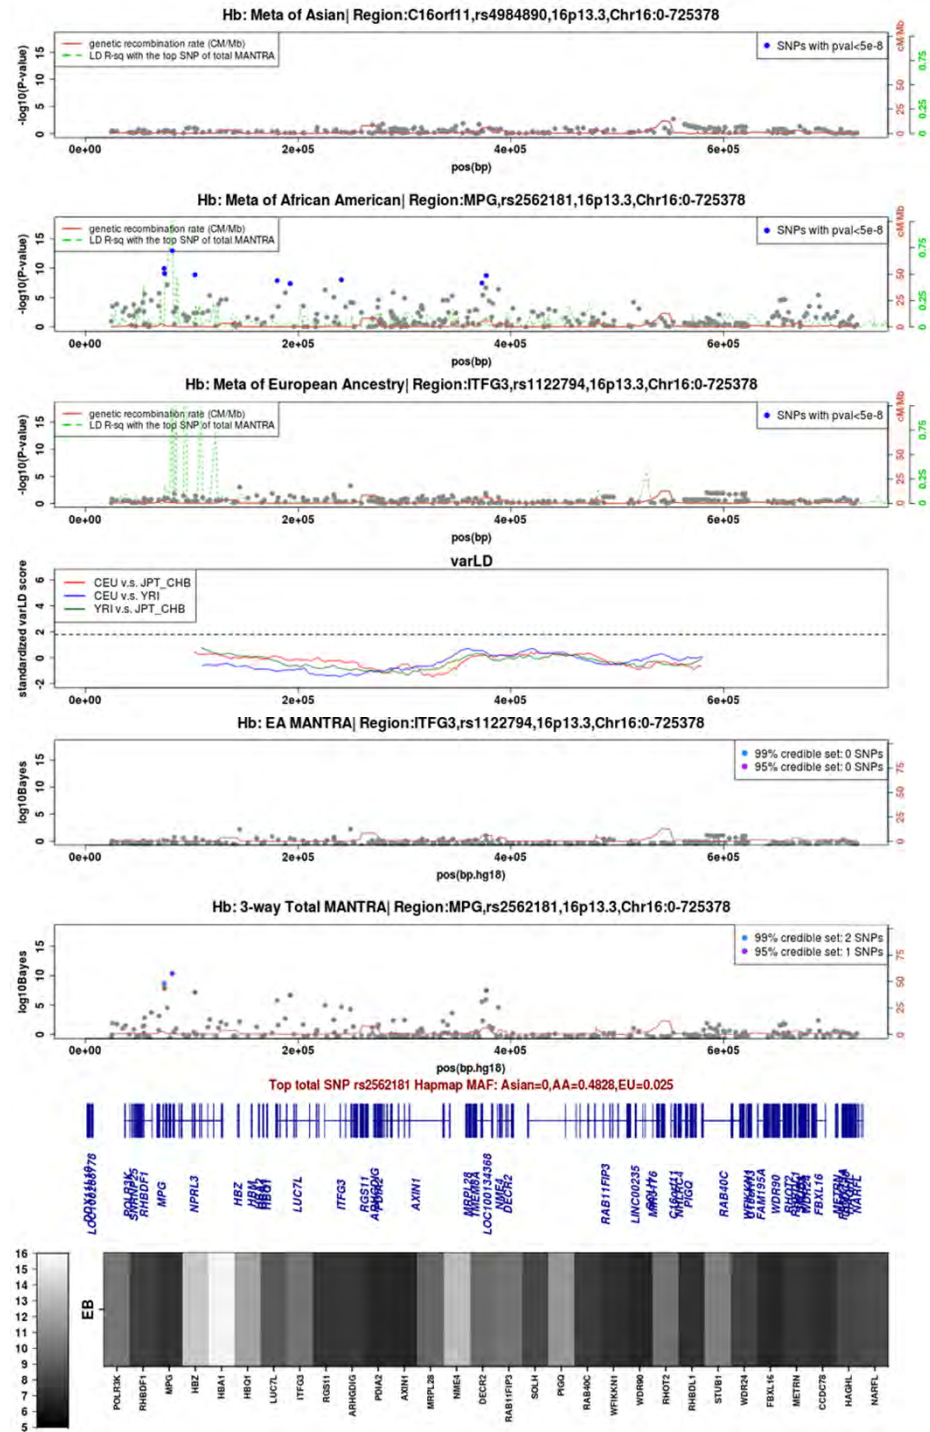



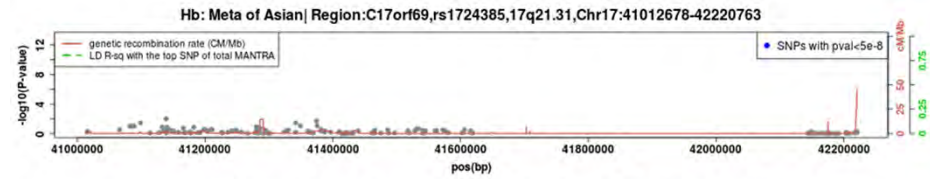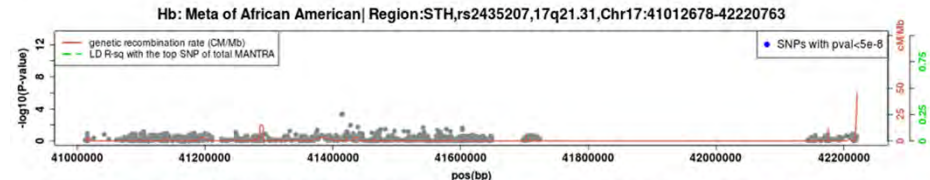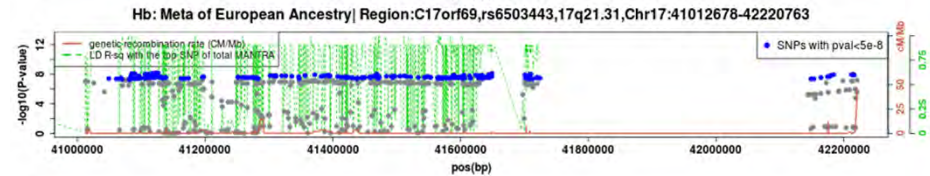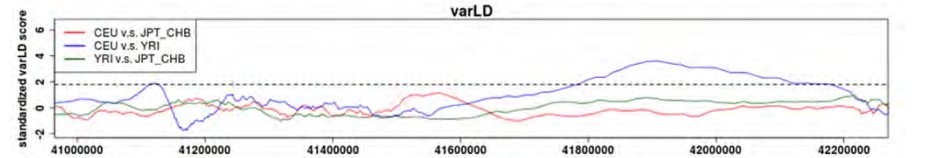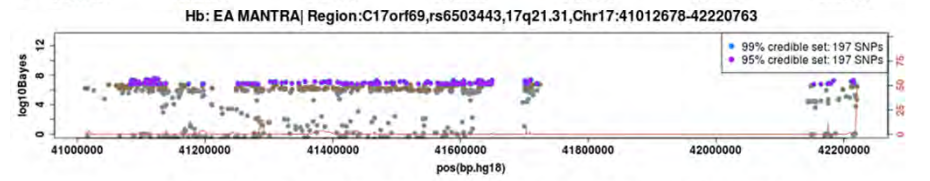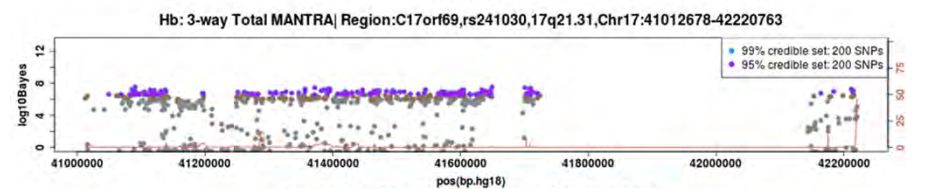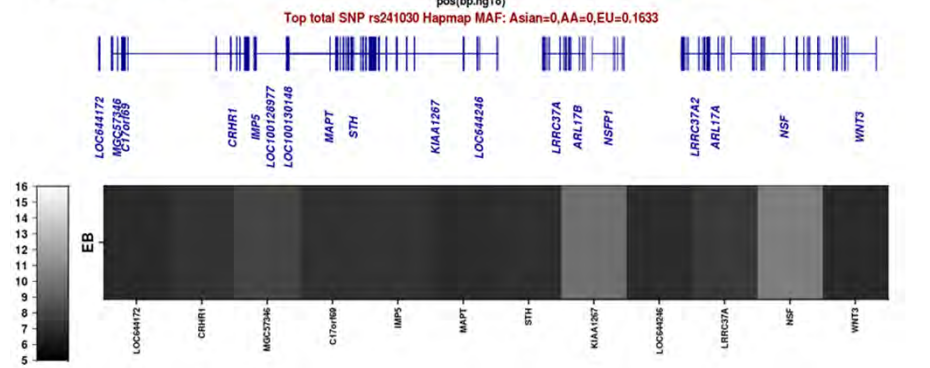

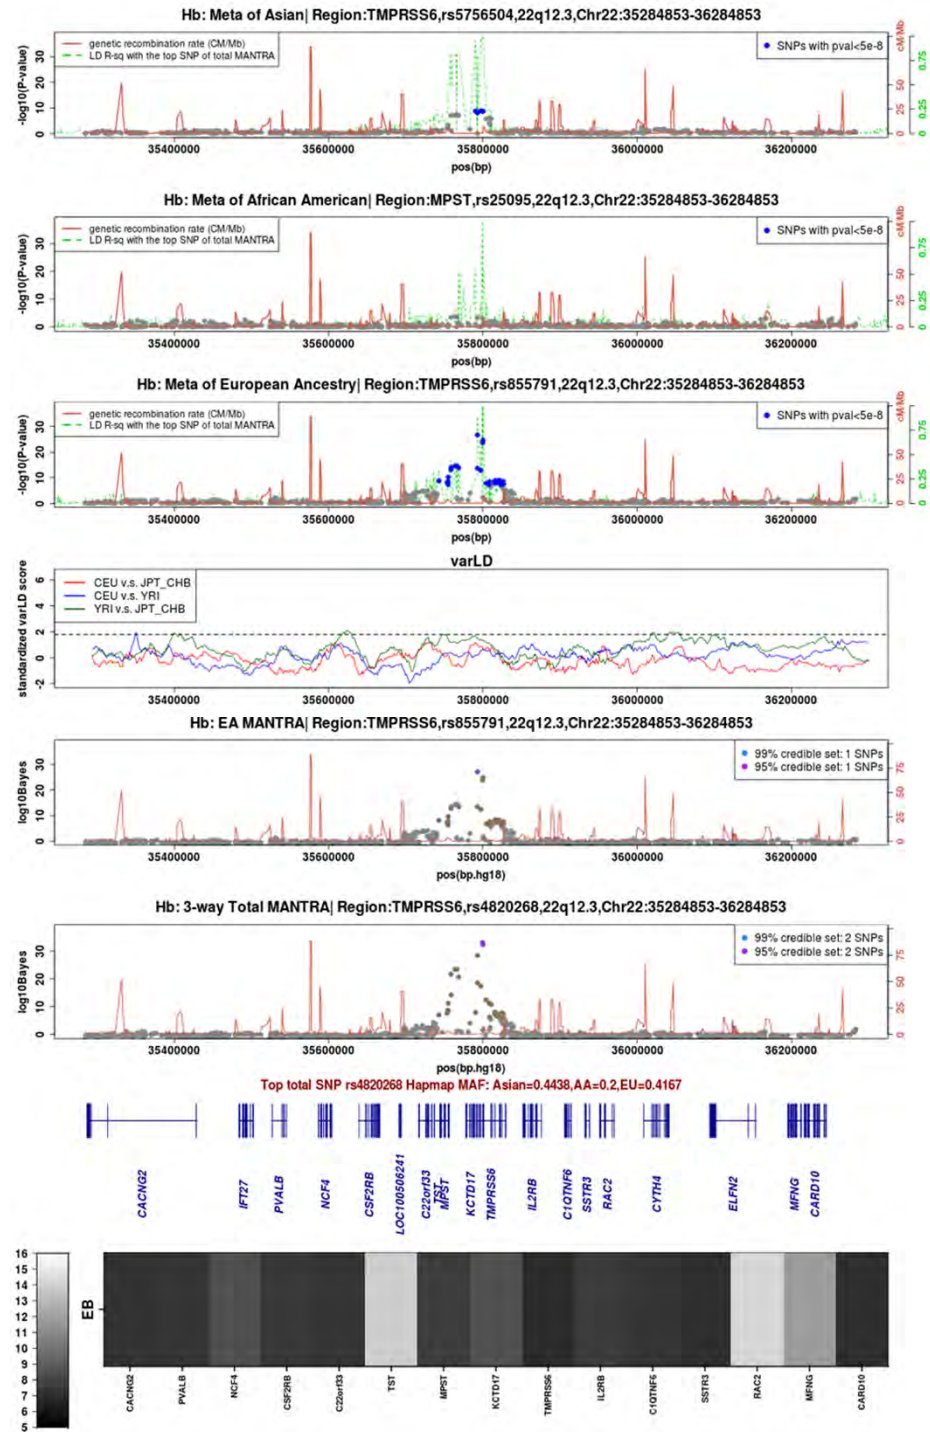

MCHC

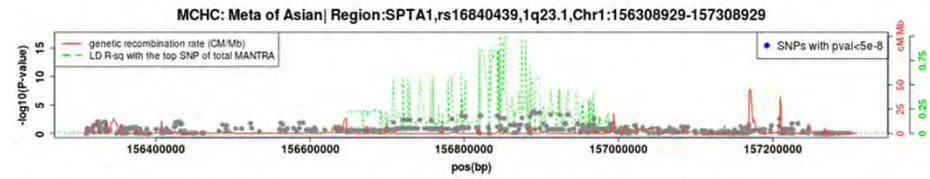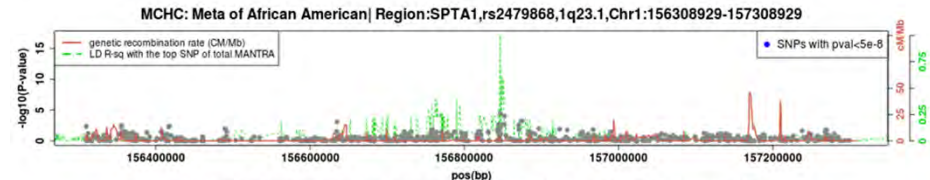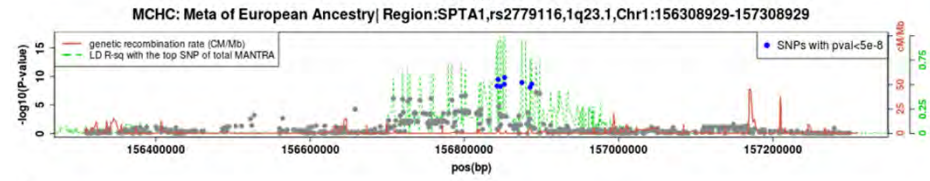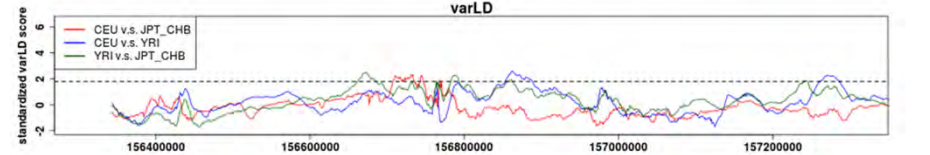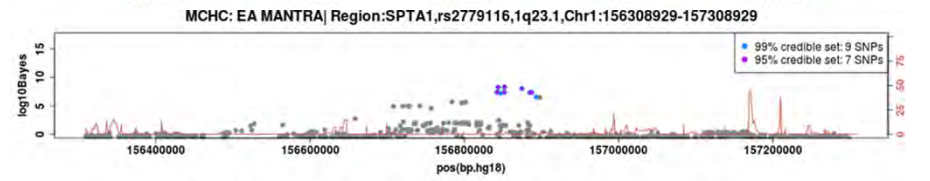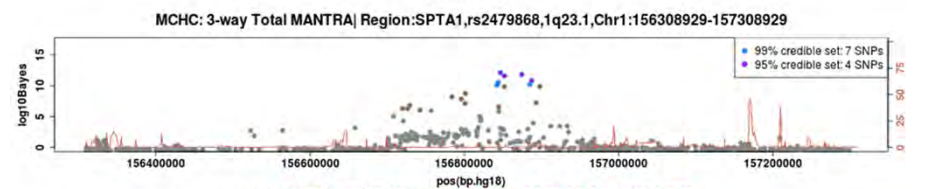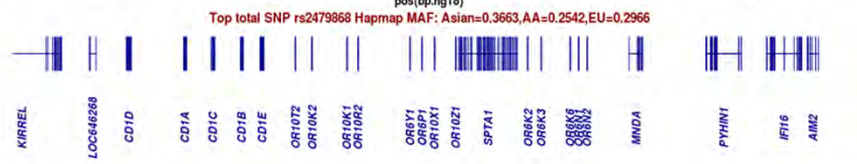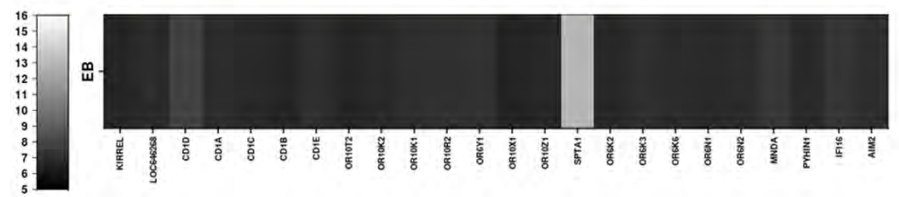

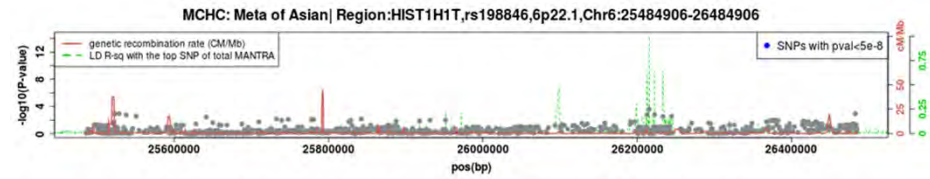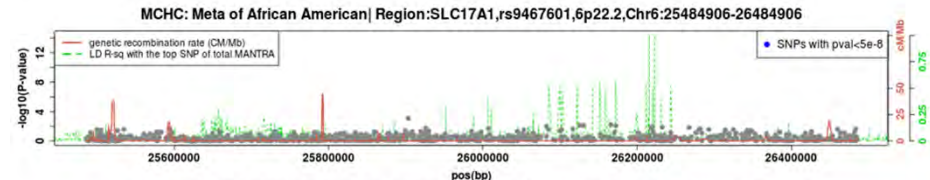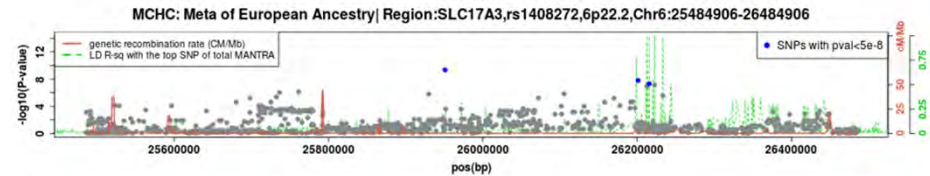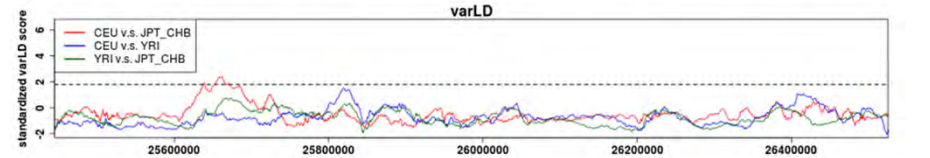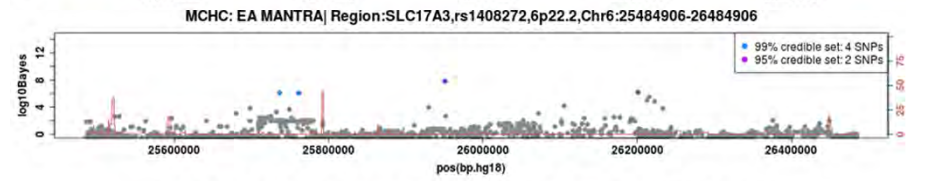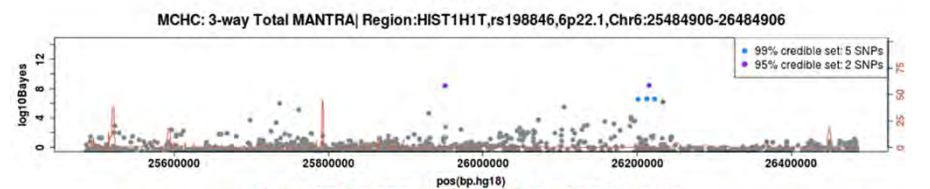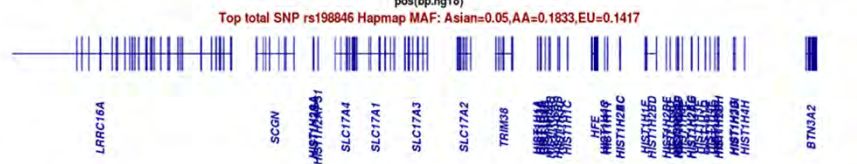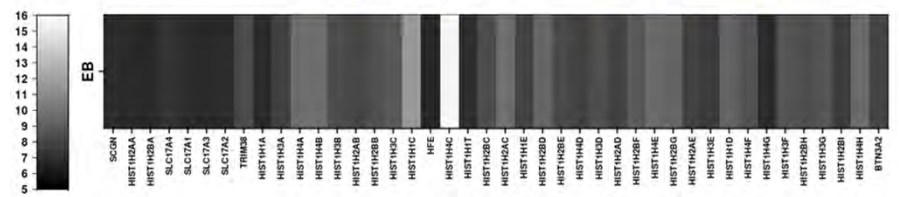

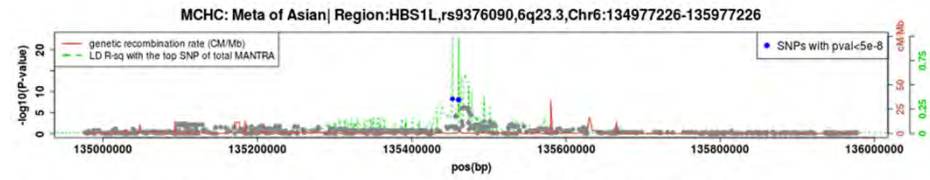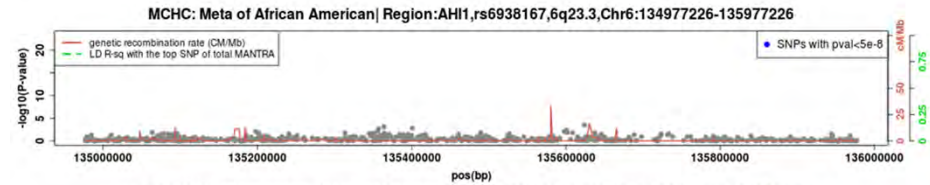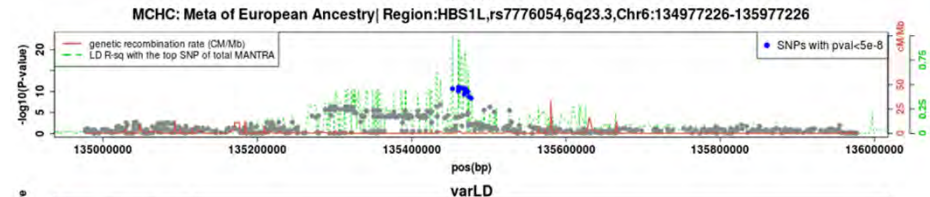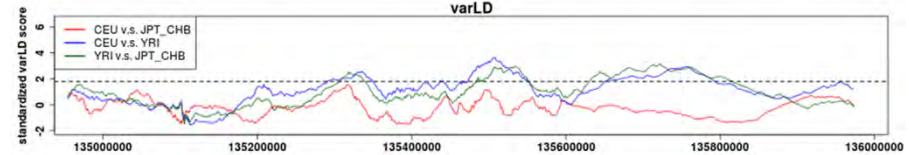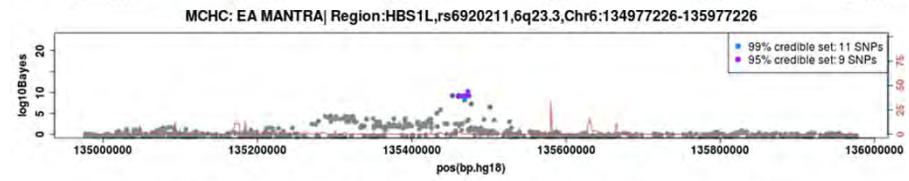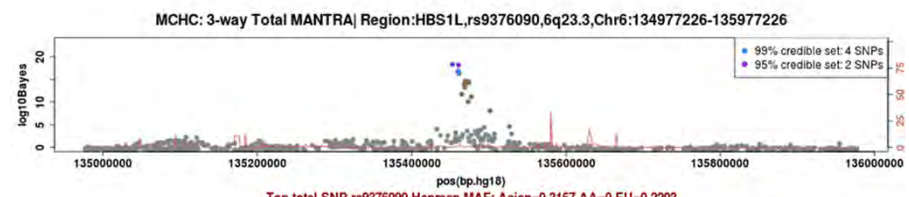

Top total SNP rs9376090 Hapmap MAF: Asian=0.3167, AA=0, EU=0.2203

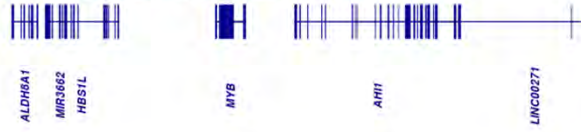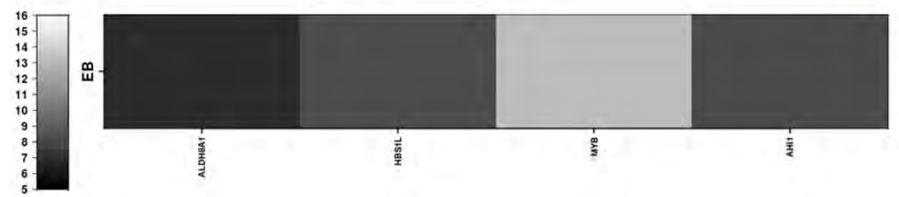

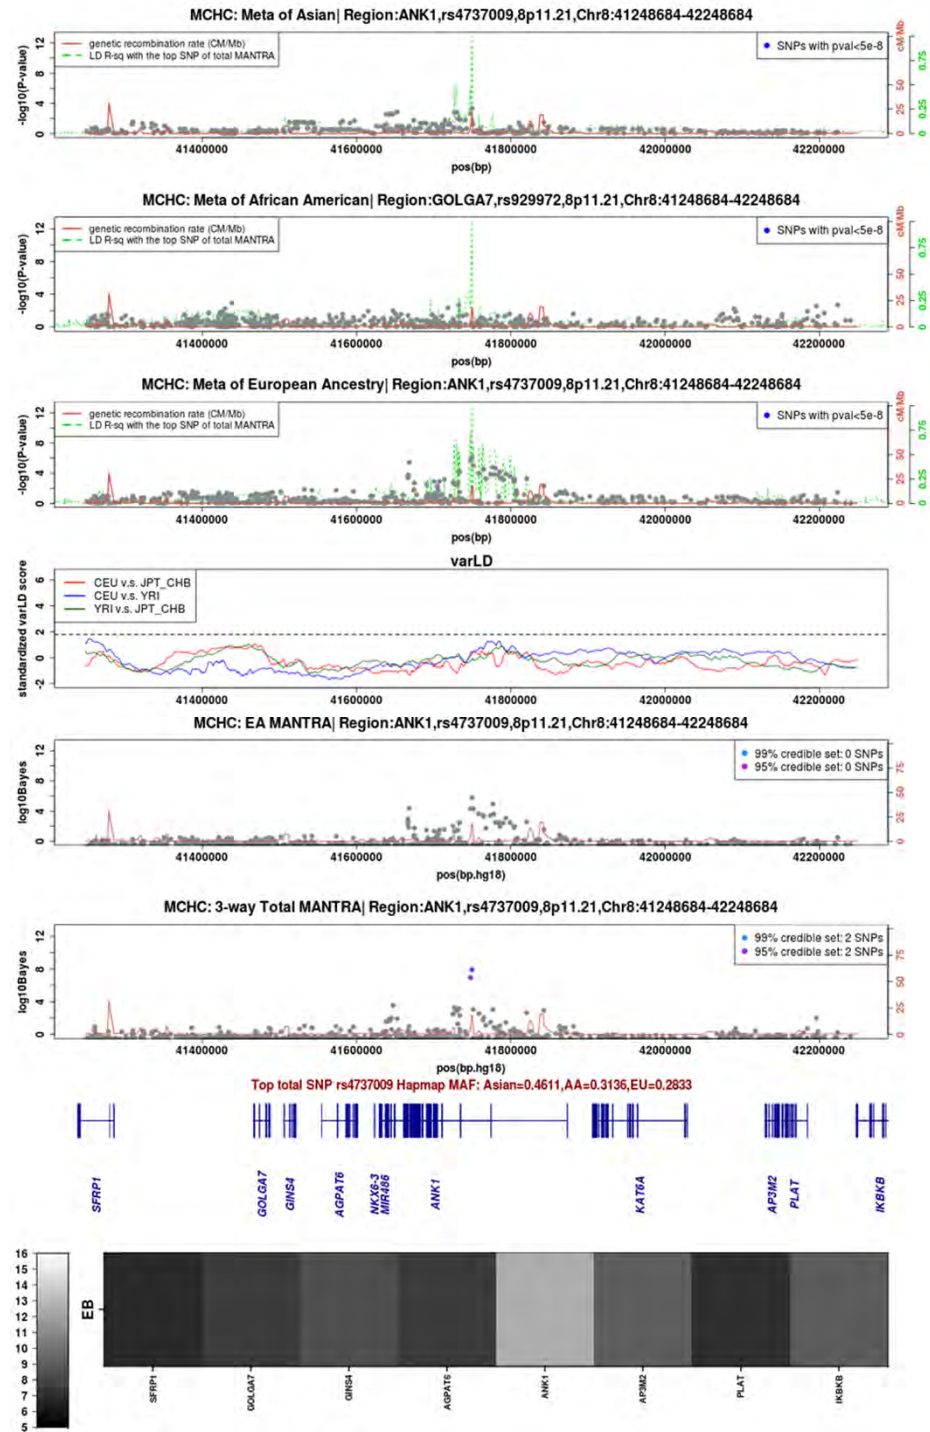

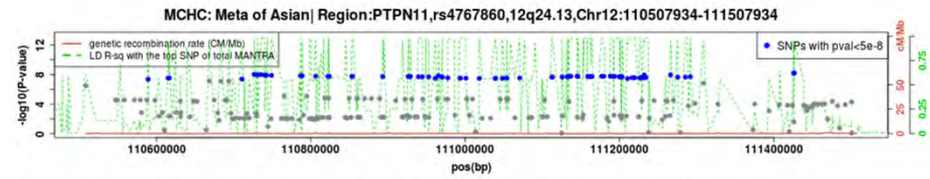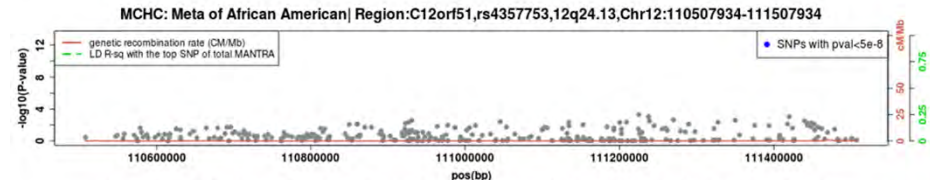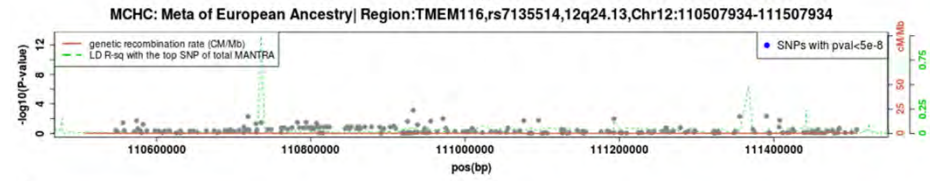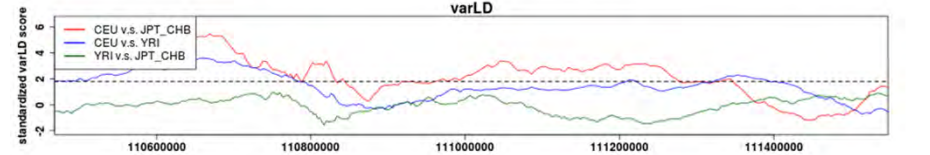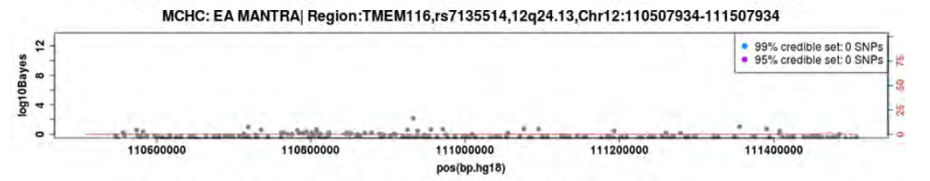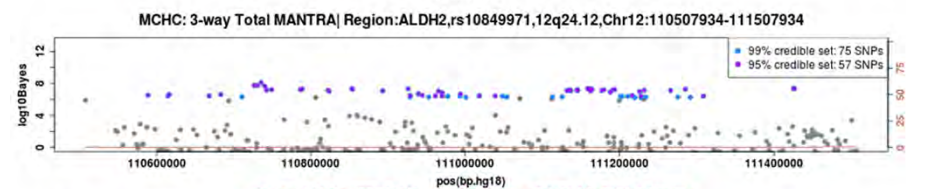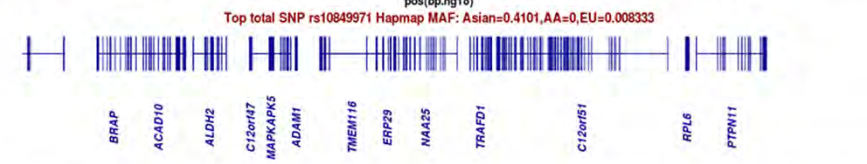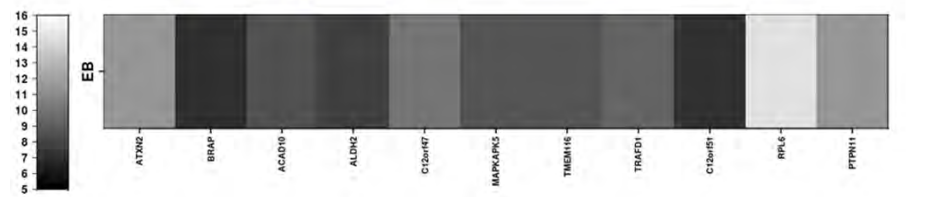



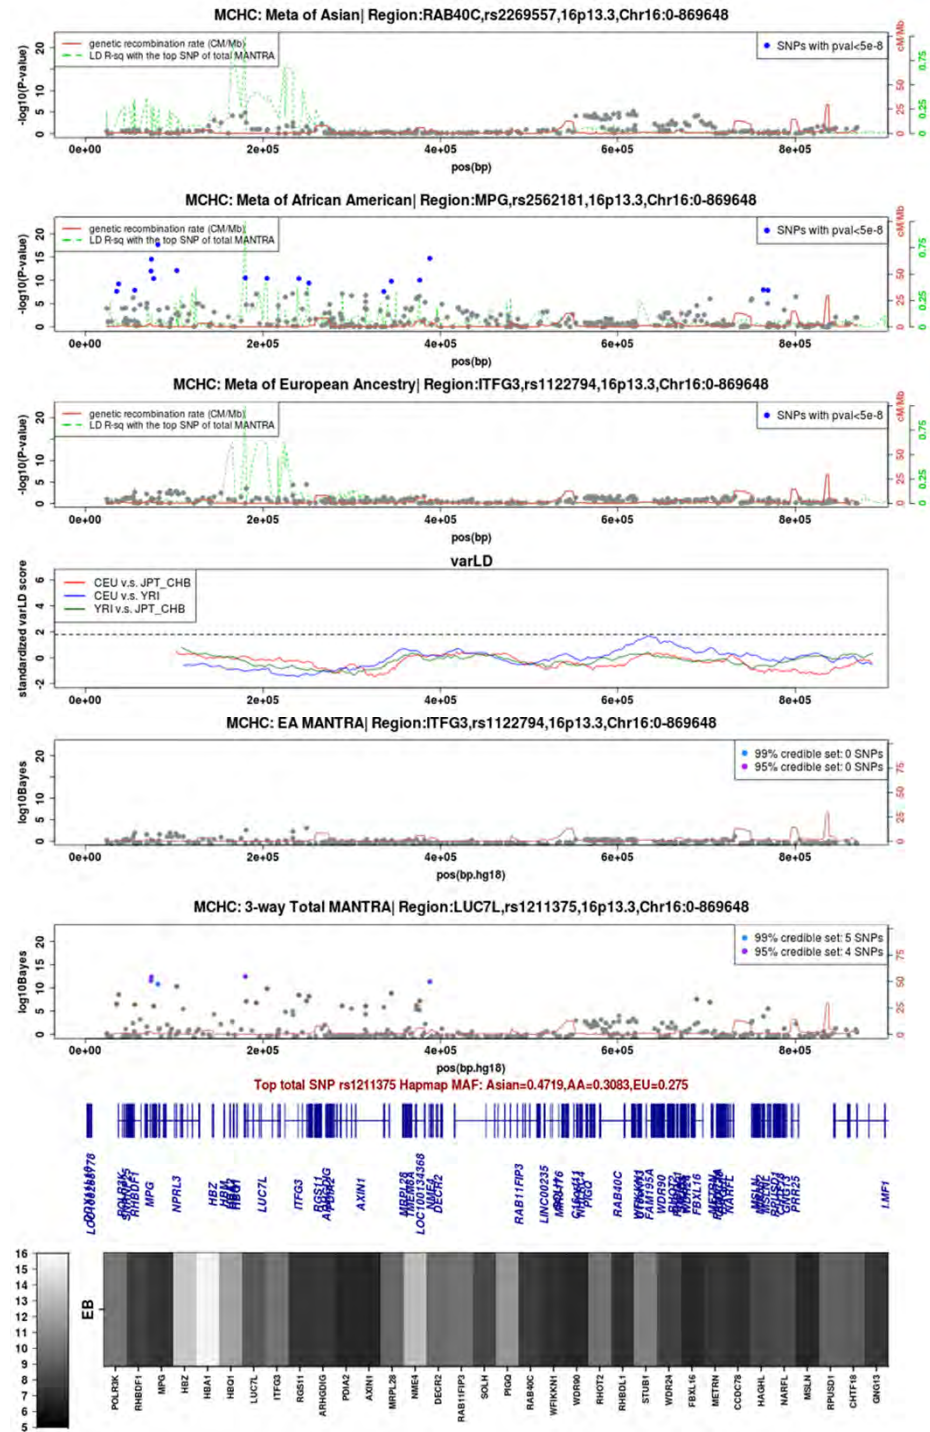

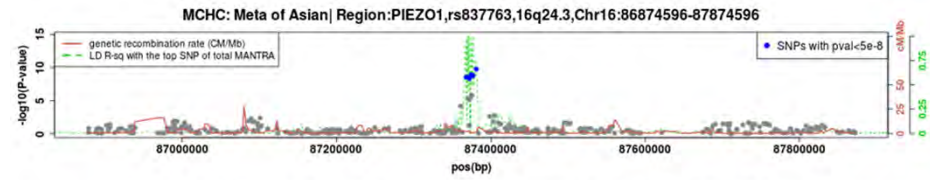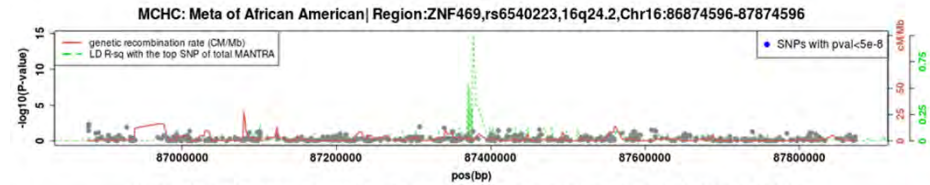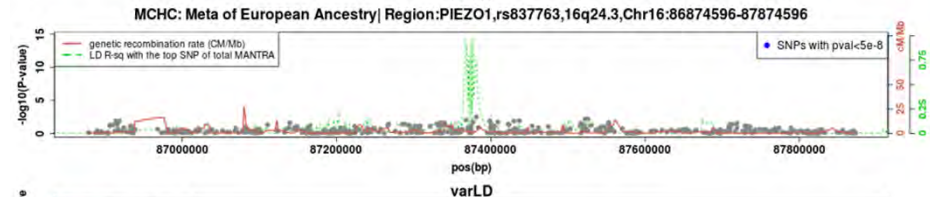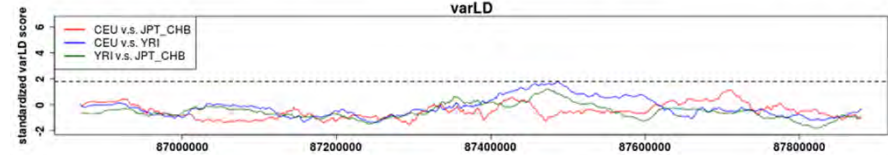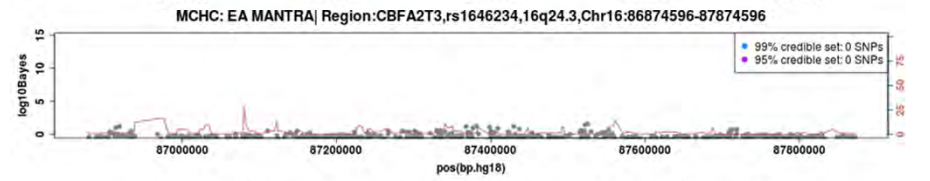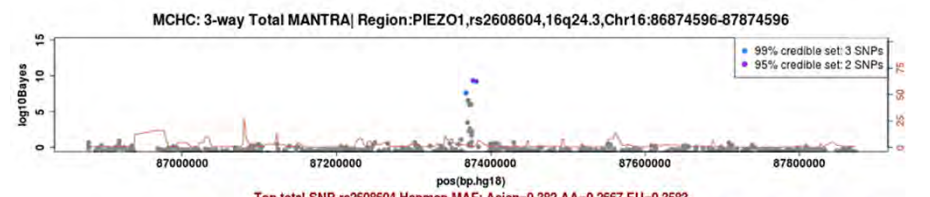

Top total SNP rs2608604 Hapmap MAF: Asian=0.382,AA=0.2667,EU=0.3583

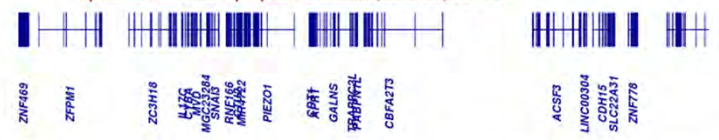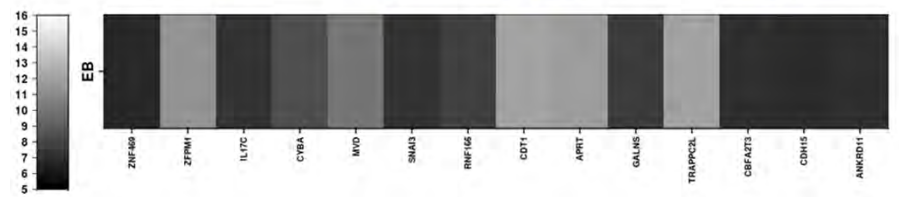

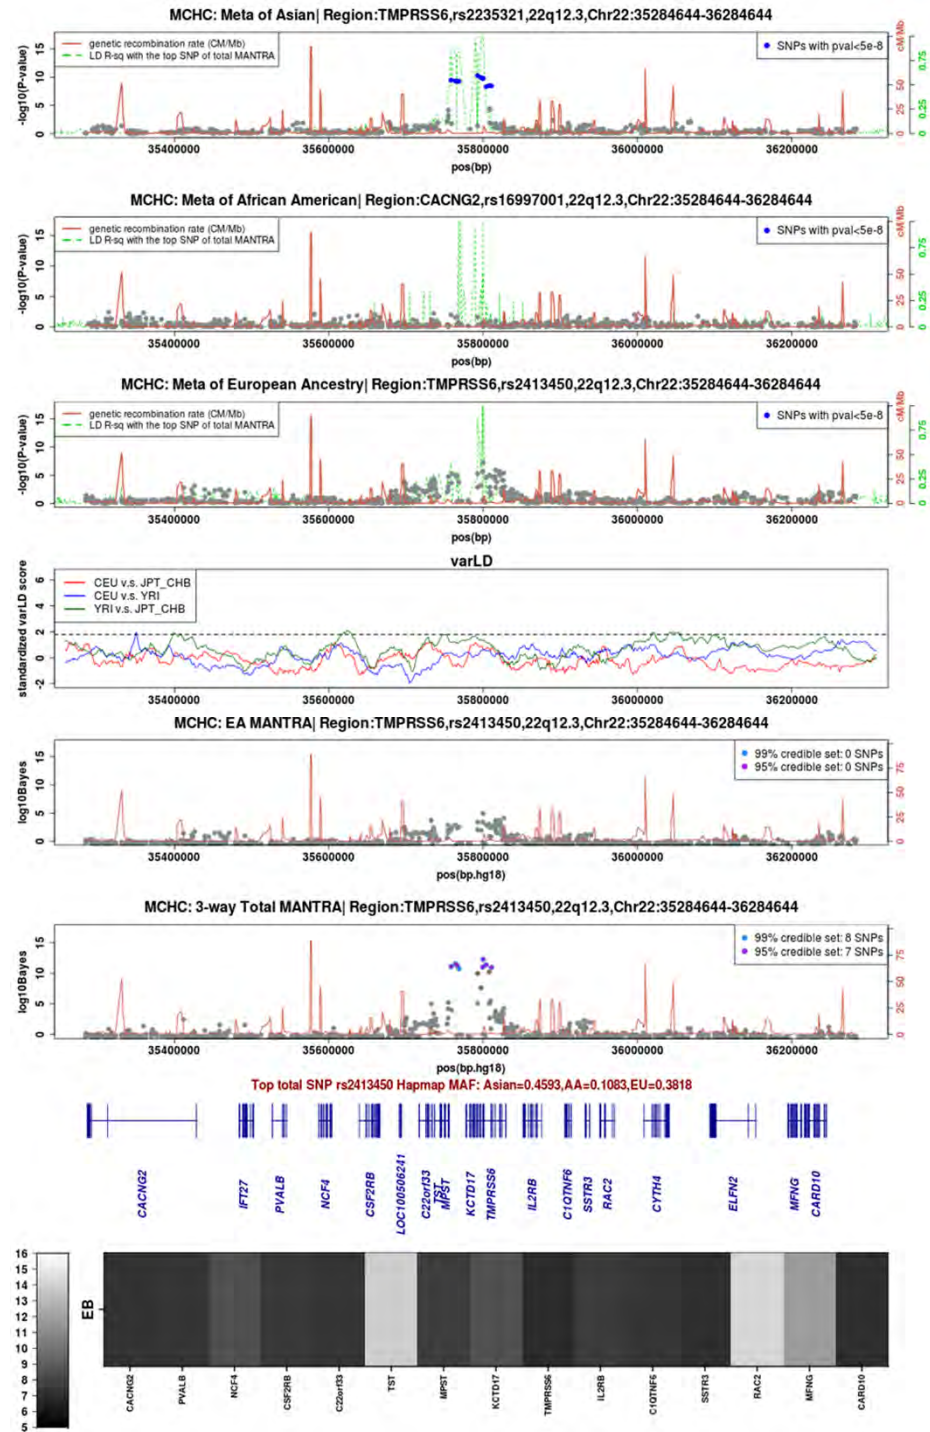

MCH

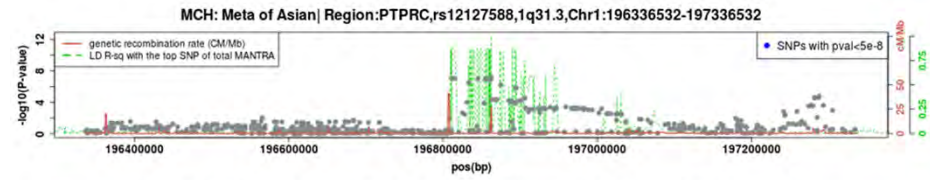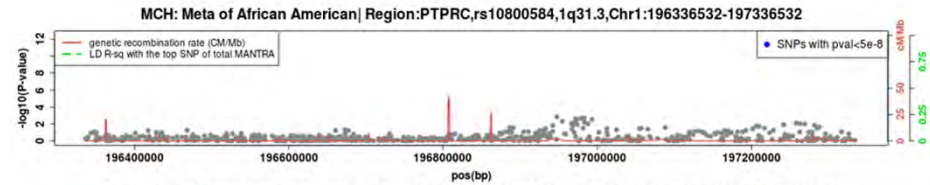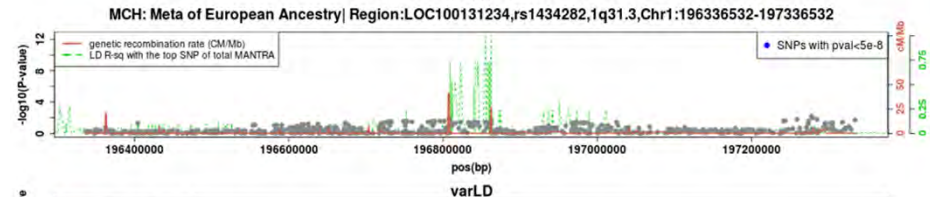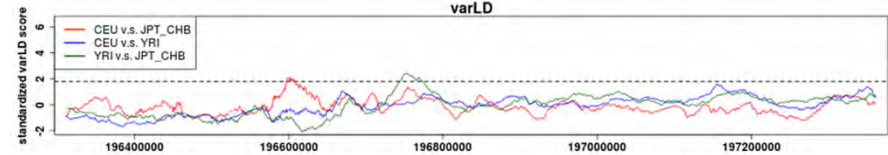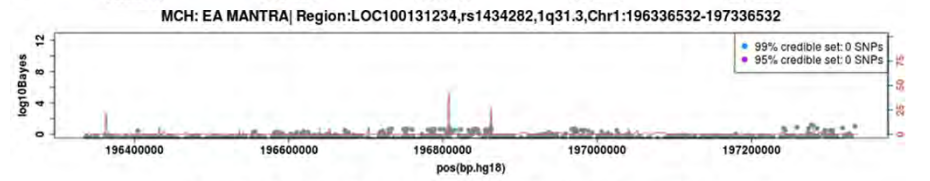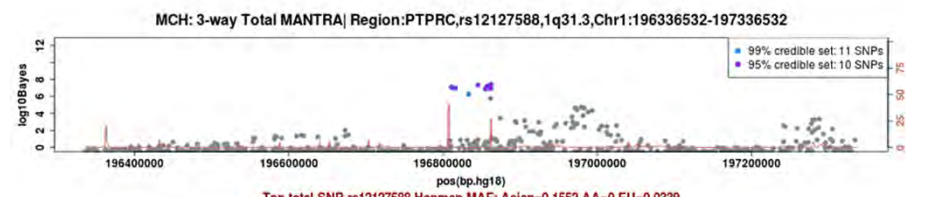

Top total SNP rs12127588 Hapmap MAF: Asian=0.1552, AA=0, EU=0.0339

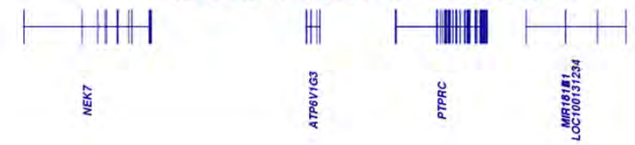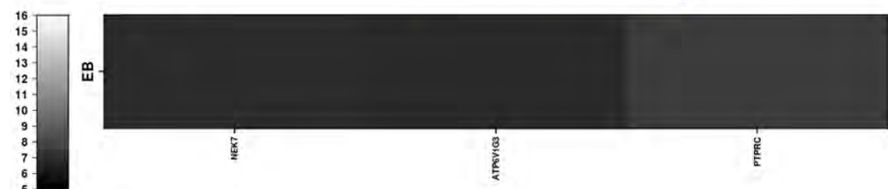

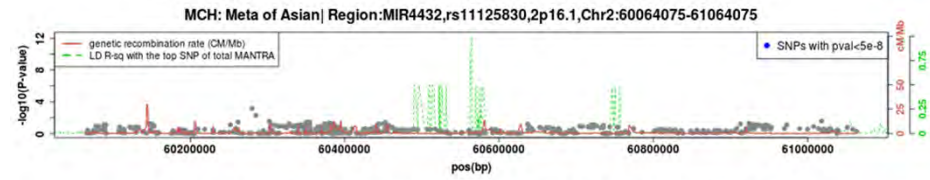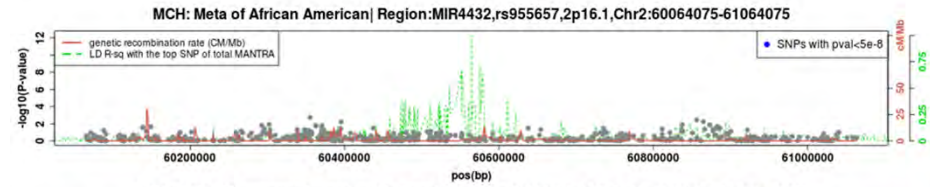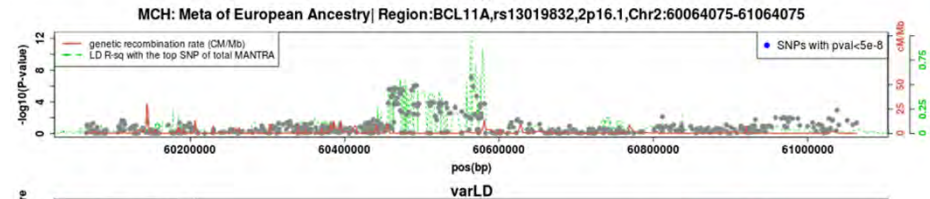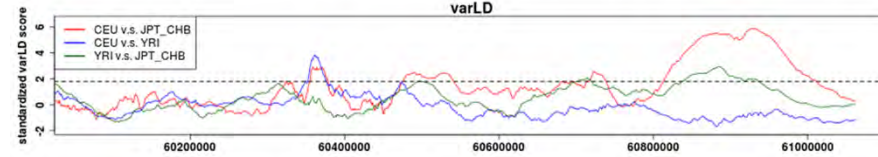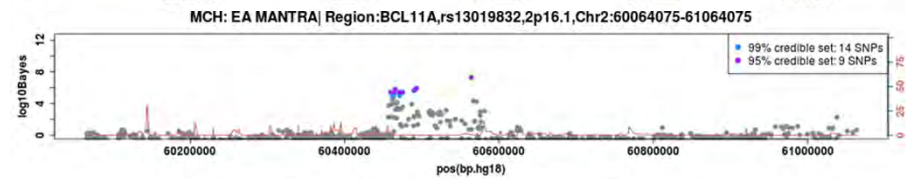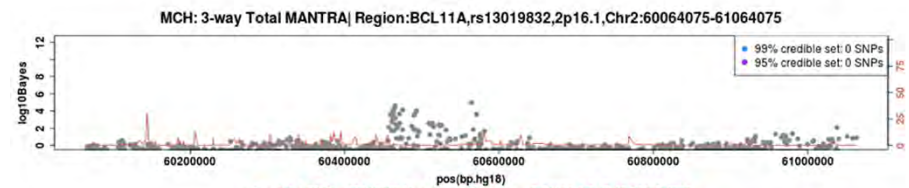

Top total SNP rs13019832 Hapmap MAF: Asian=0.01111, AA=0.45, EU=0.4333

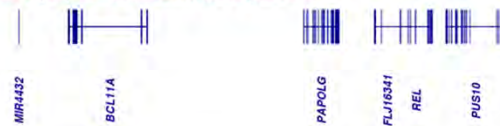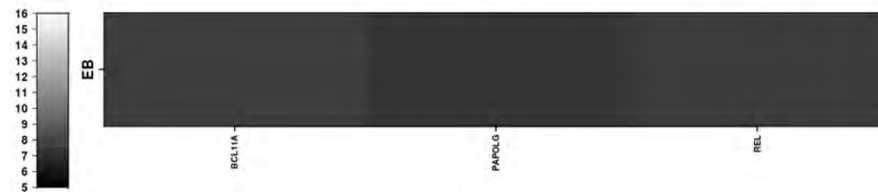

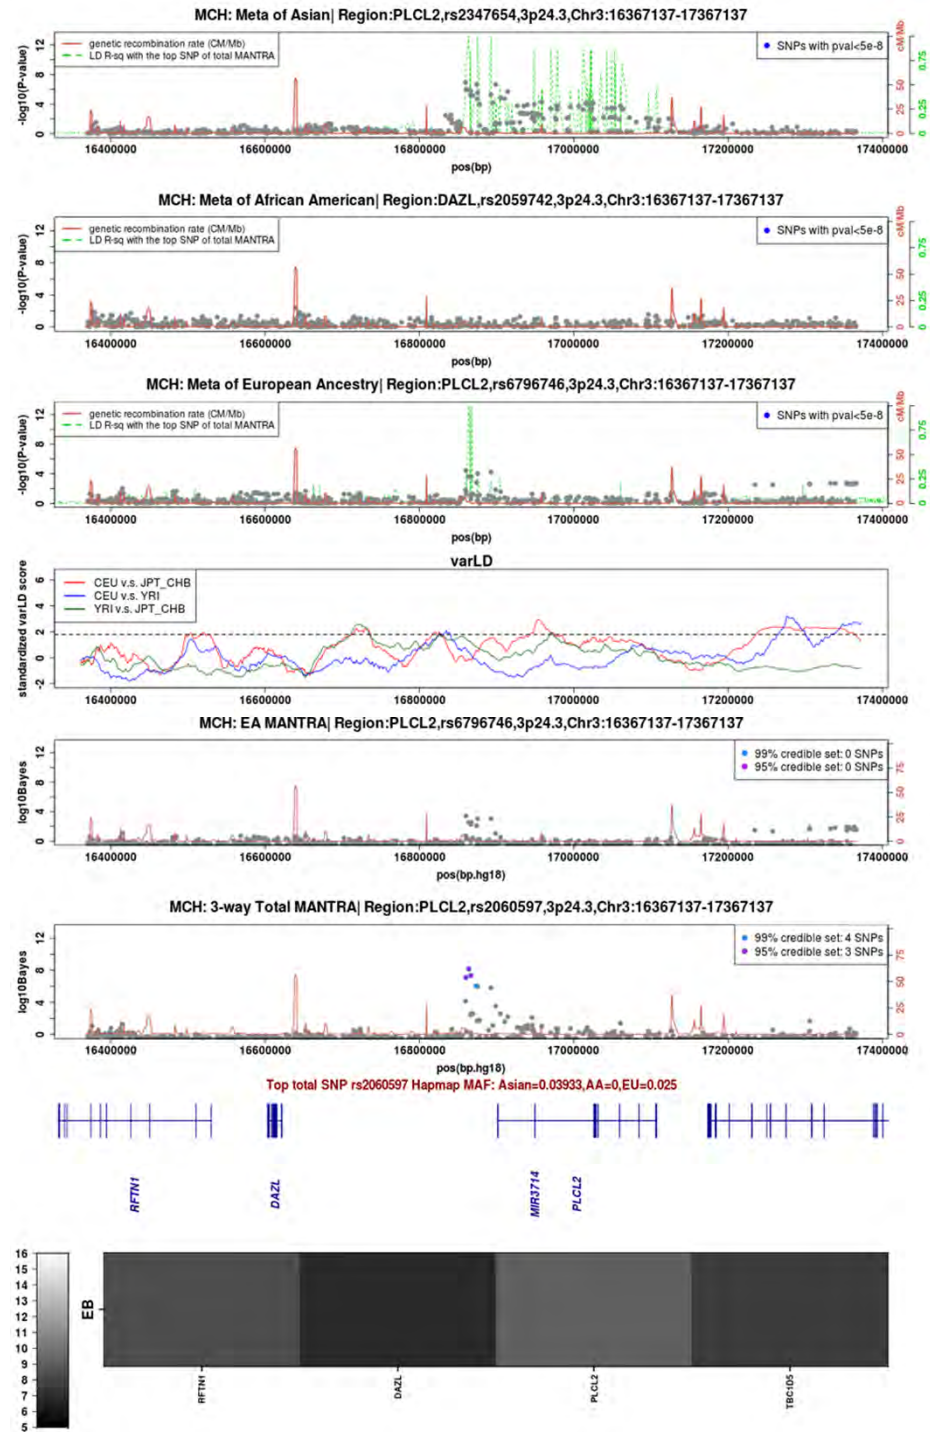

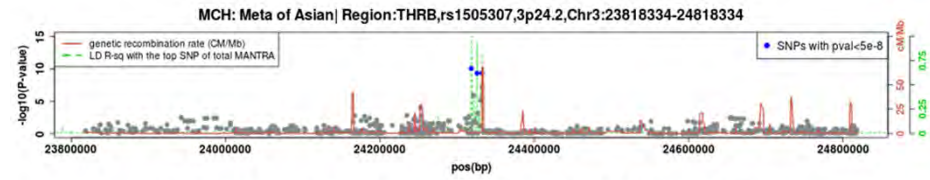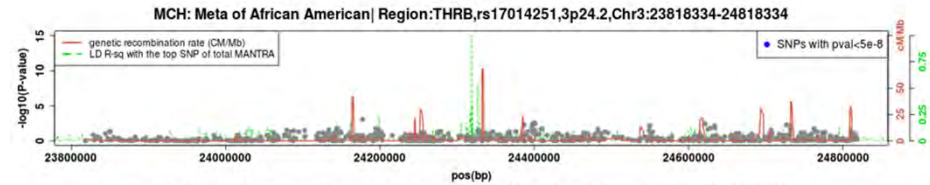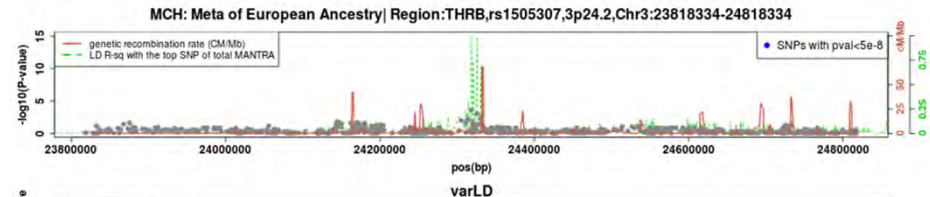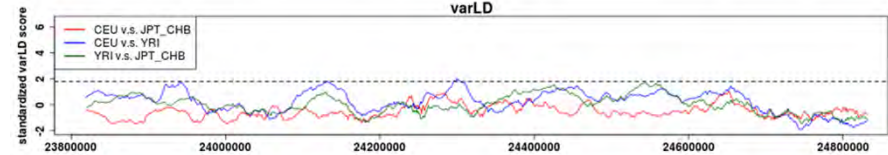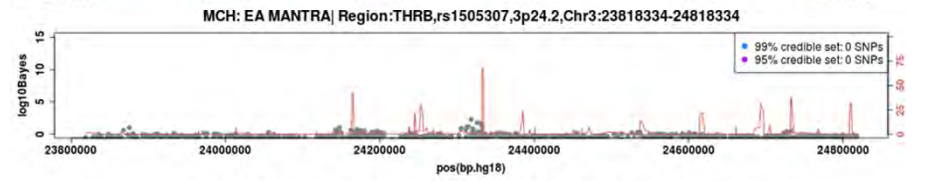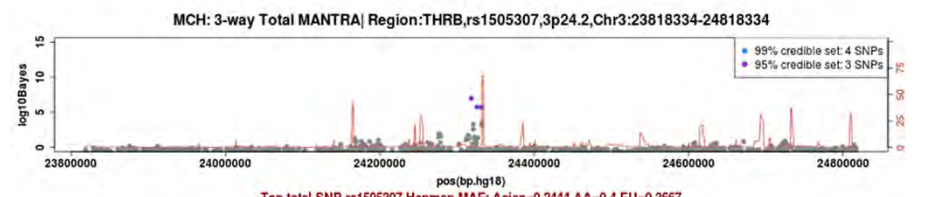

Top total SNP rs1505307 Hapmap MAF: Asian=0.2444, AA=0.4, EU=0.3667

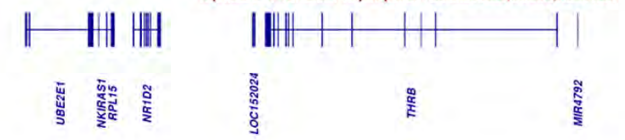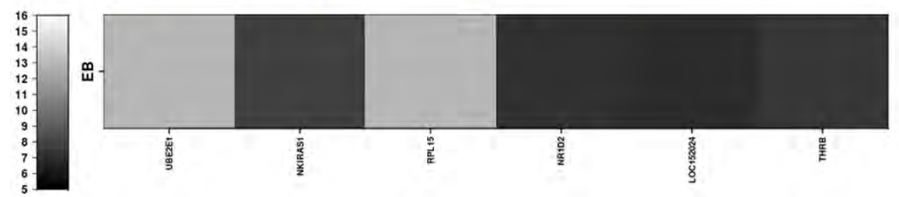



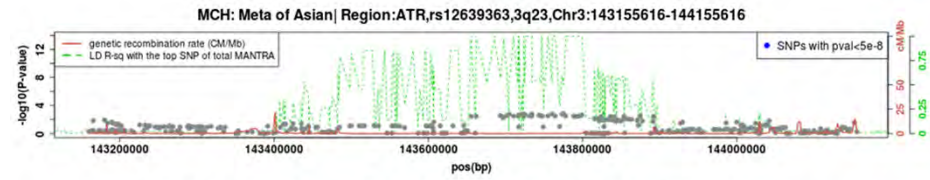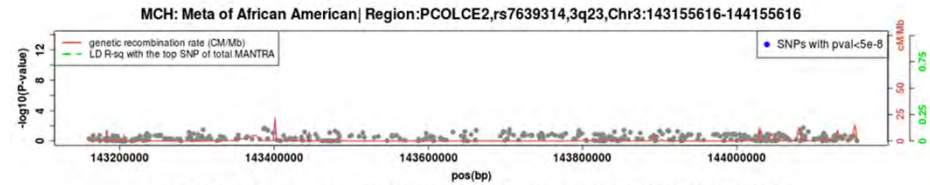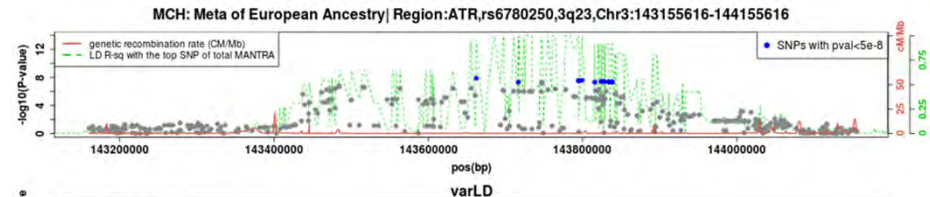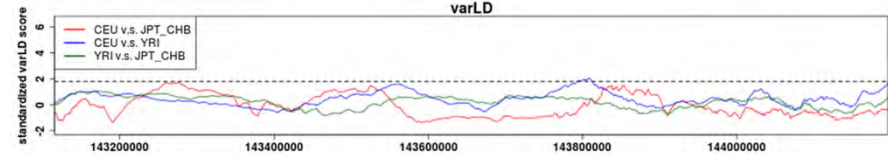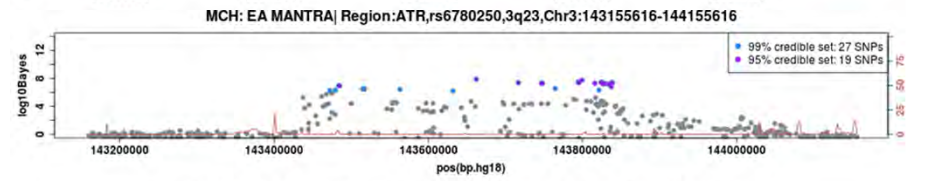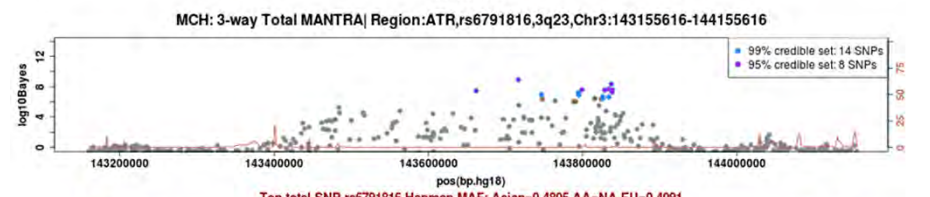

Top total SNP rs6791816 Hapmap MAF: Asian=0.4805, AA=NA, EU=0.4091

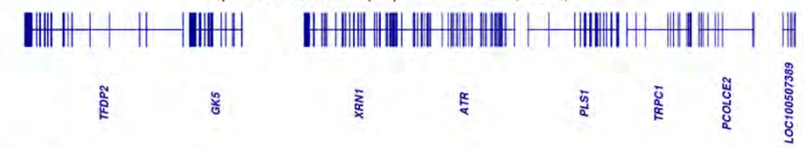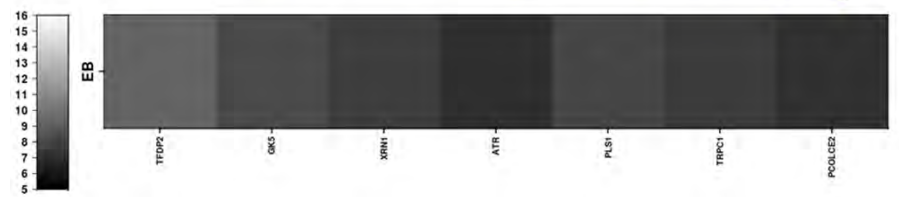

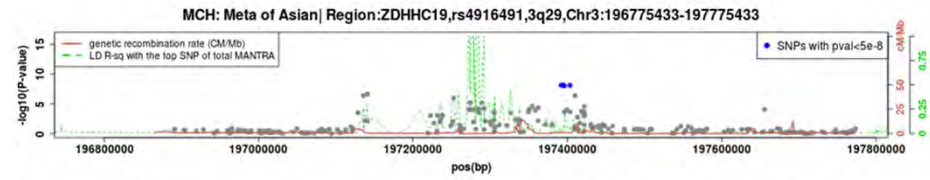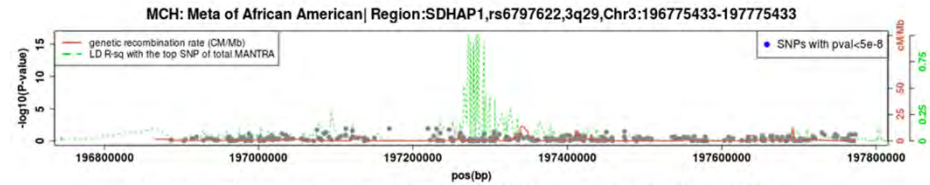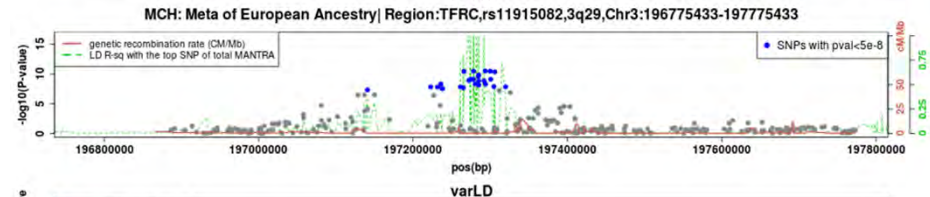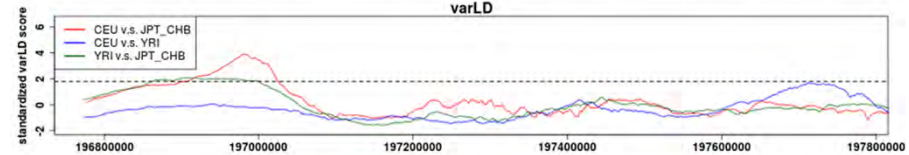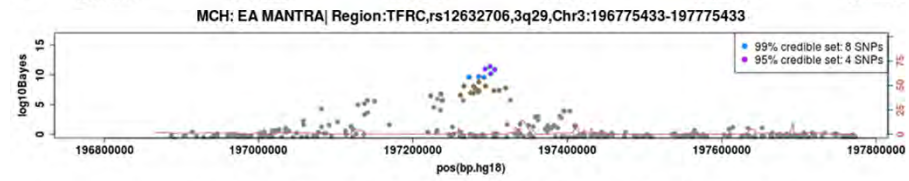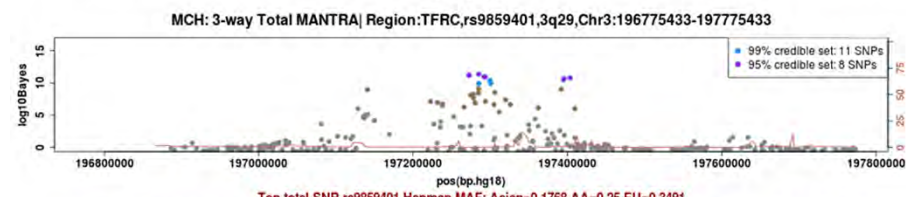

Top total SNP rs9859401 Hapmap MAF: Asian=0.1768, AA=0.25, EU=0.3491

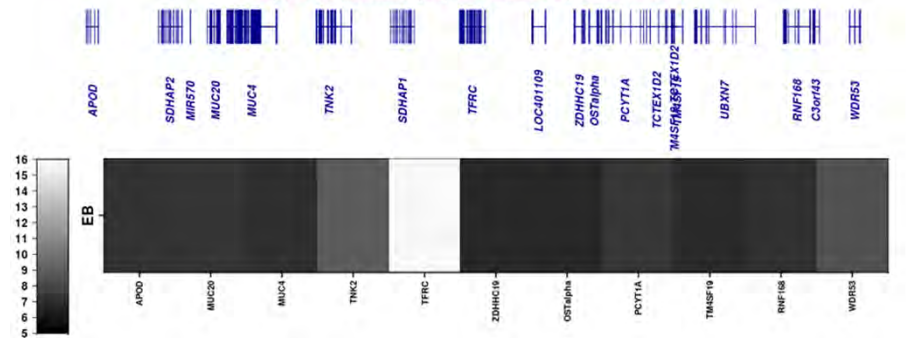

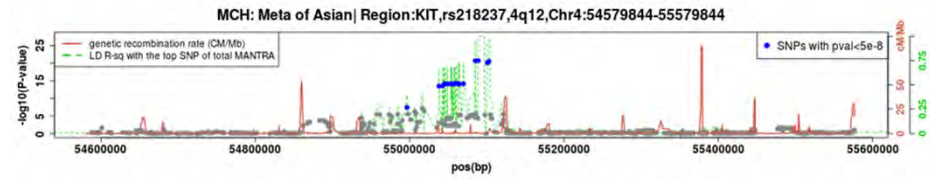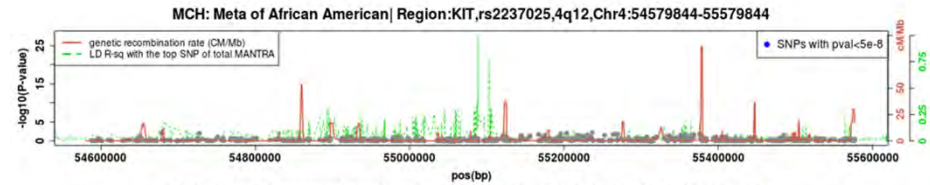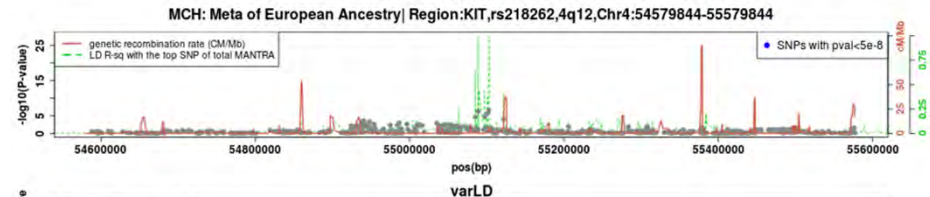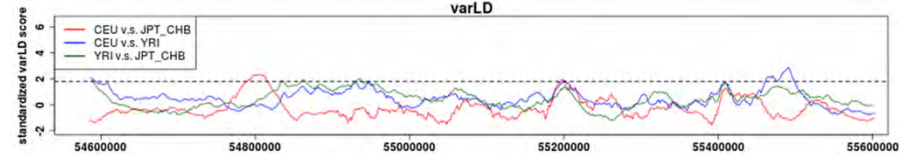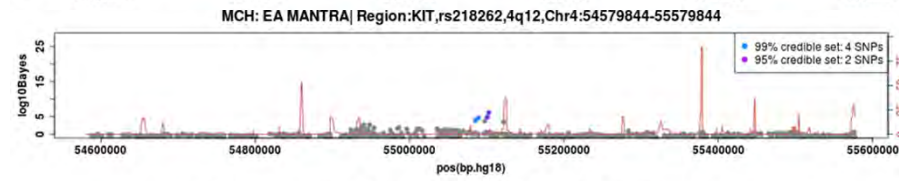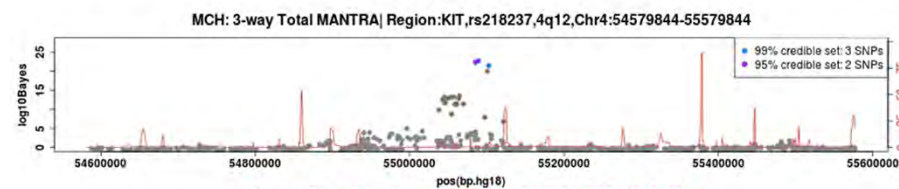

Top total SNP rs218237 Hapmap MAF: Asian=0.3258, AA=0.2712, EU=0.1102

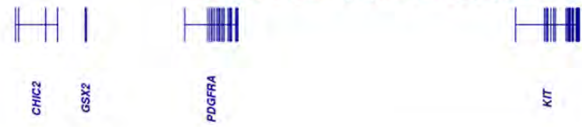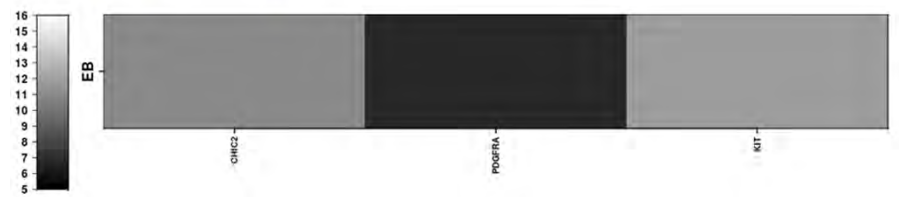

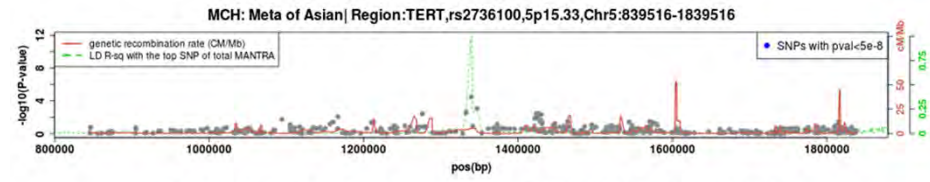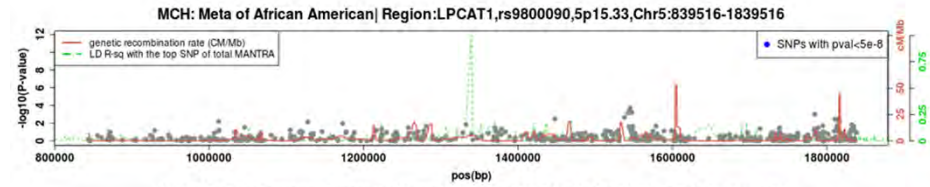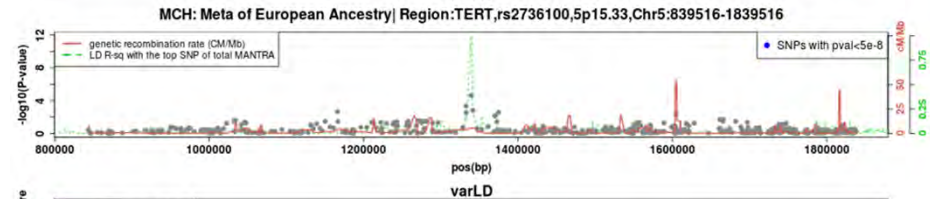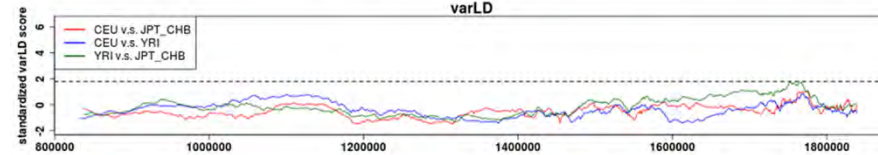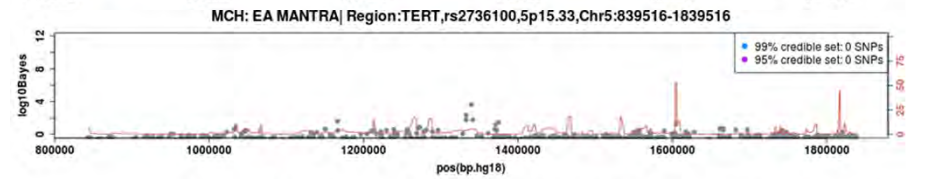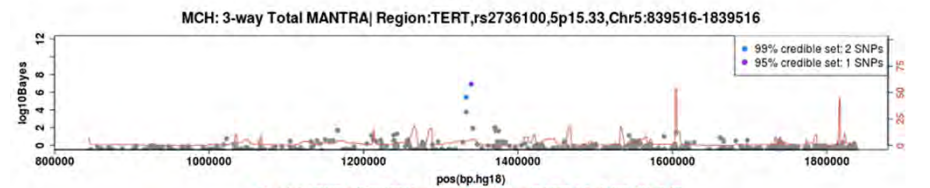

Top total SNP rs2736100 Hapmap MAF: Asian=0.3889, AA=0.425, EU=0.45

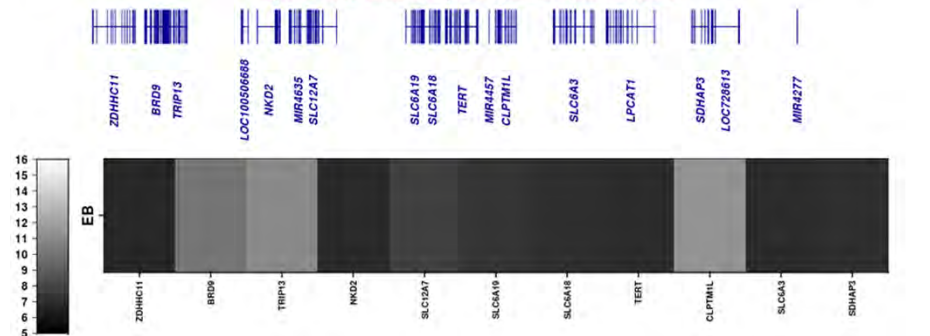



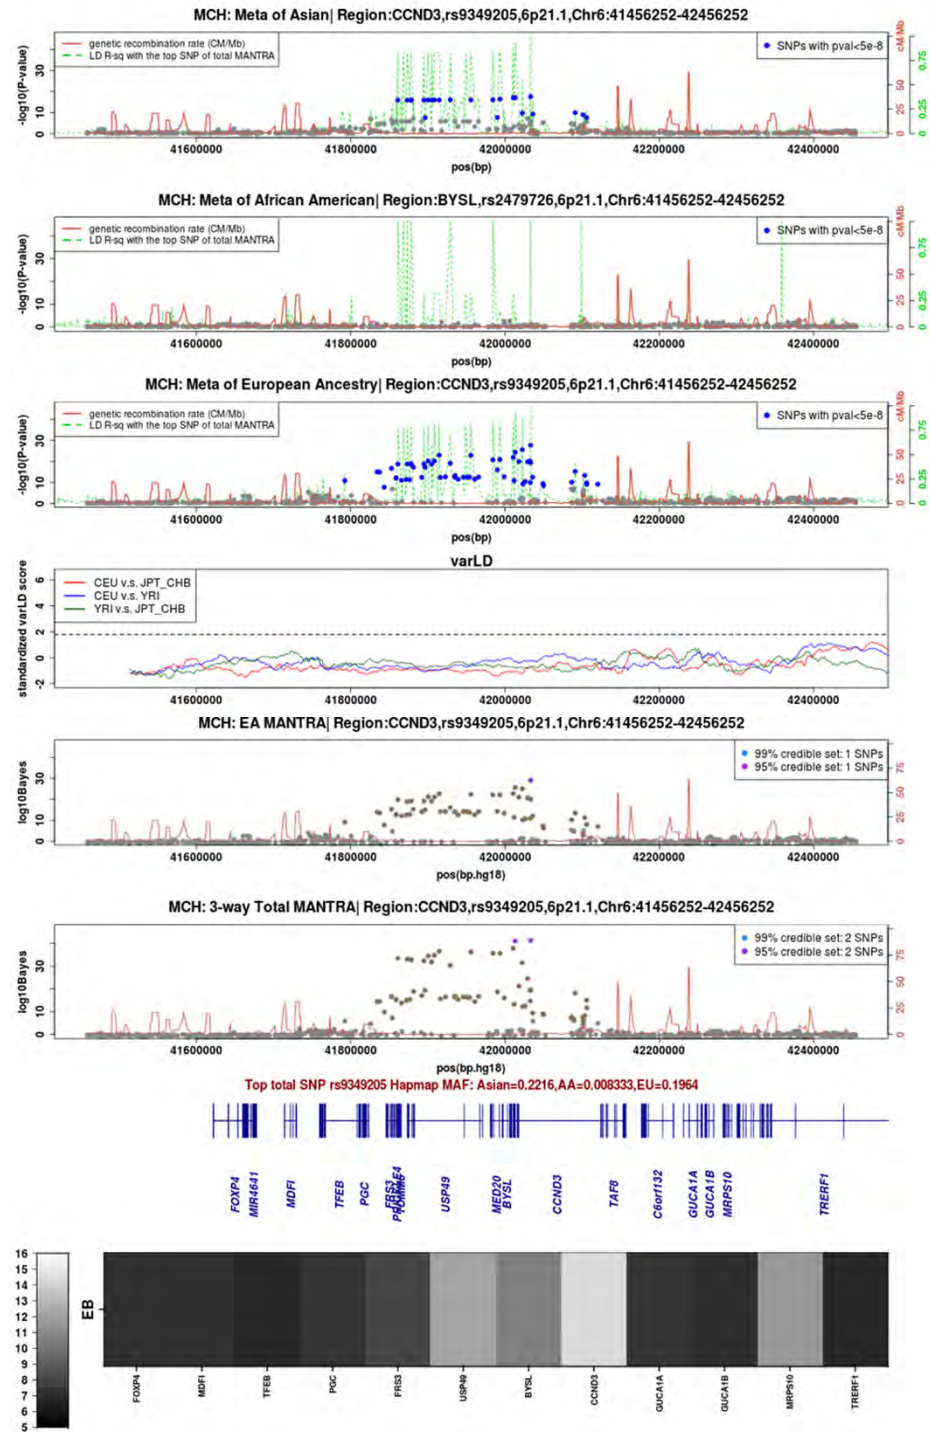

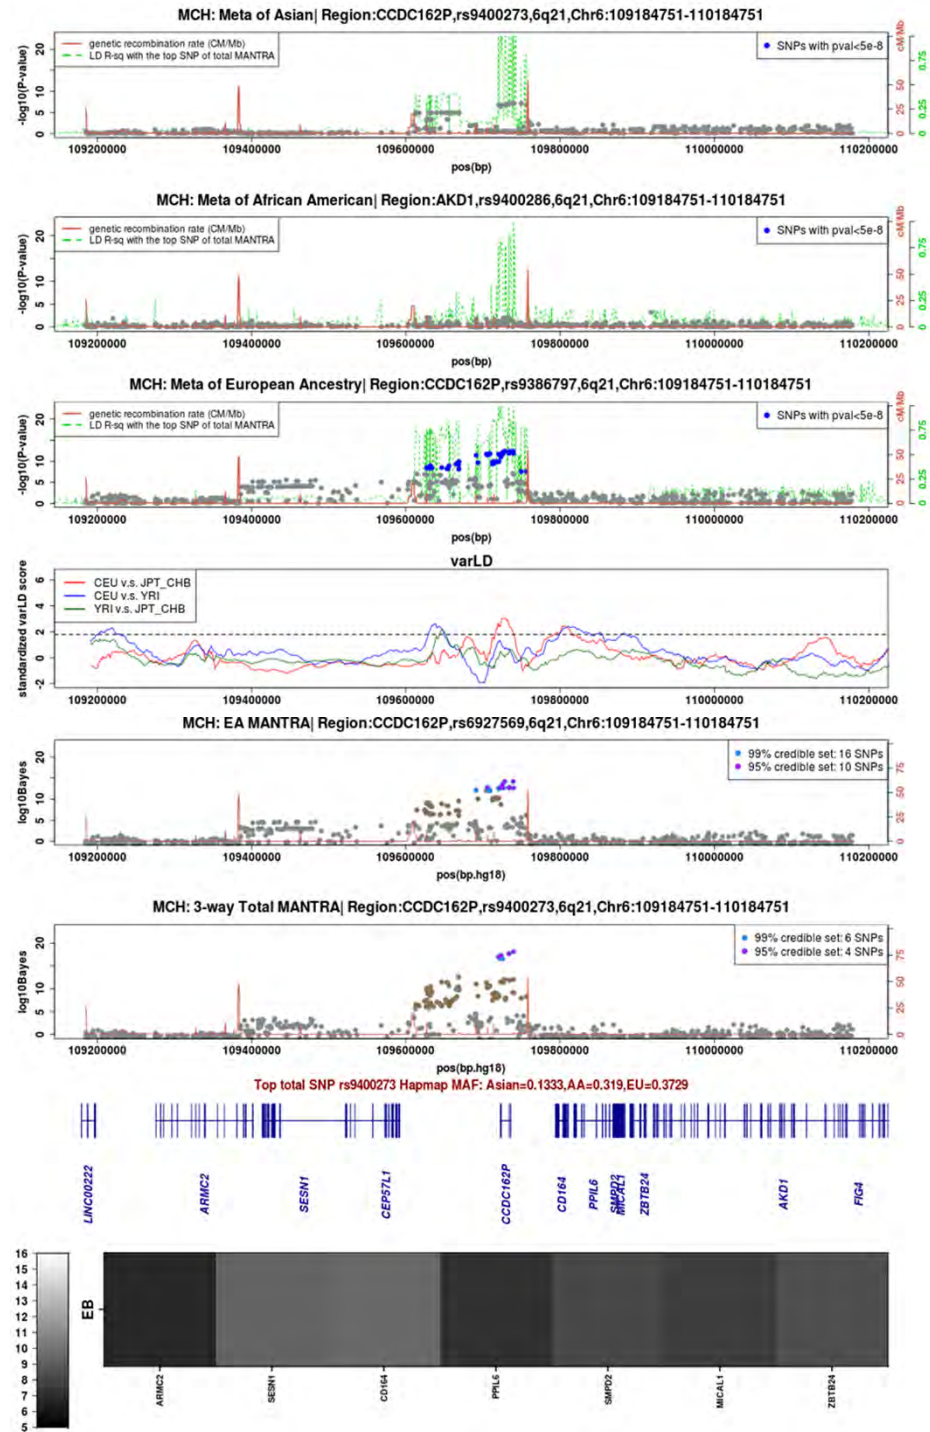

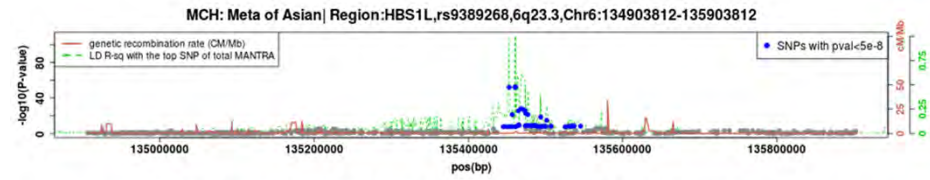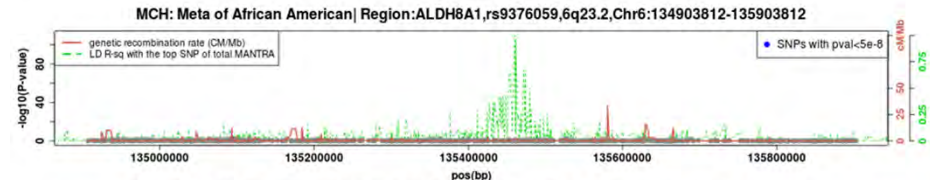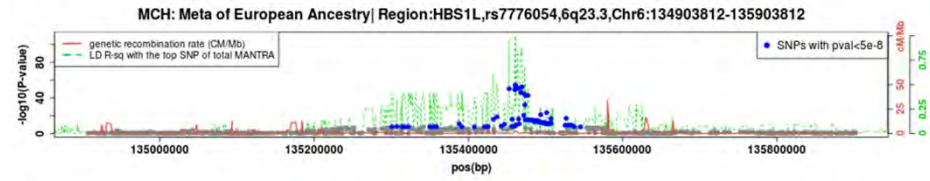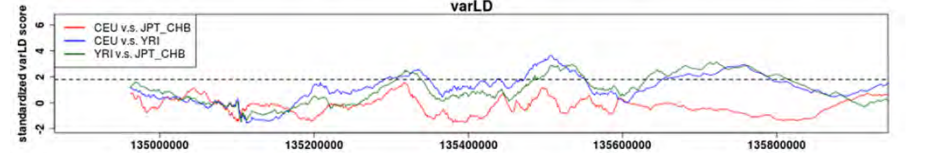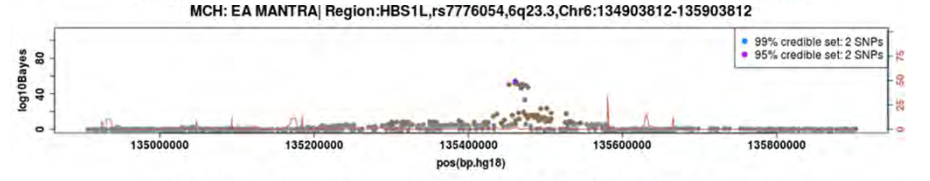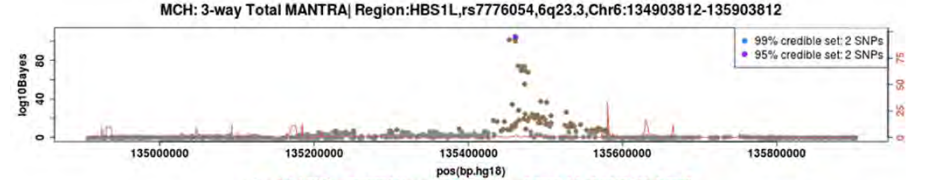

Top total SNP rs7776054 Hapmap MAF: Asian=0.3222,AA=0.2417,EU=0.2203

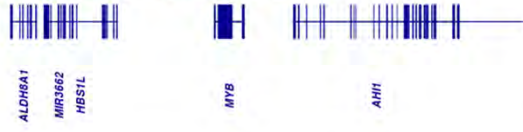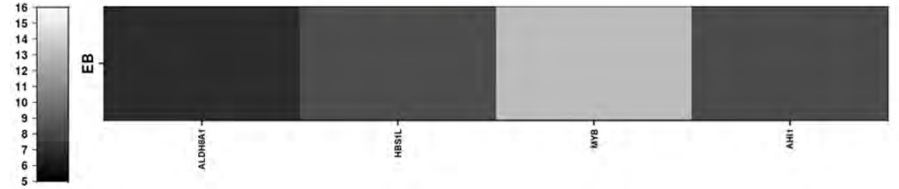



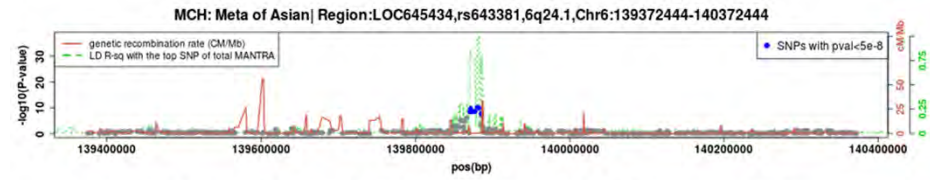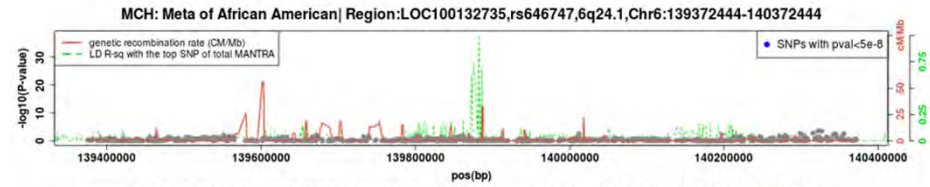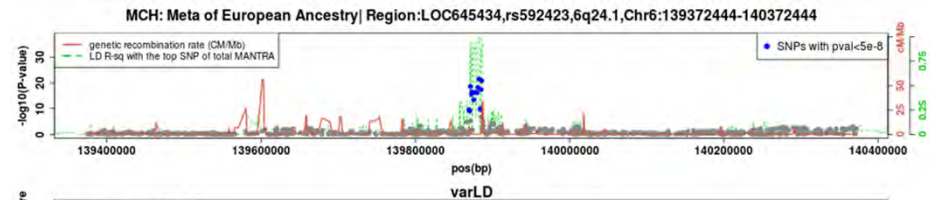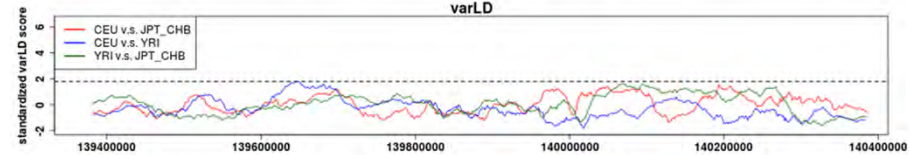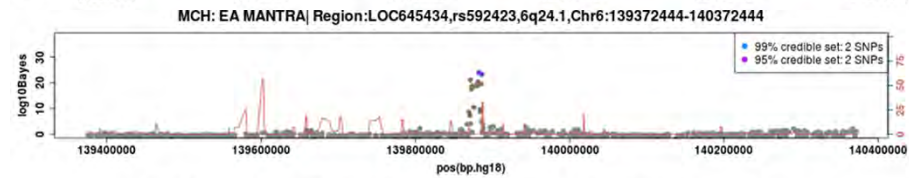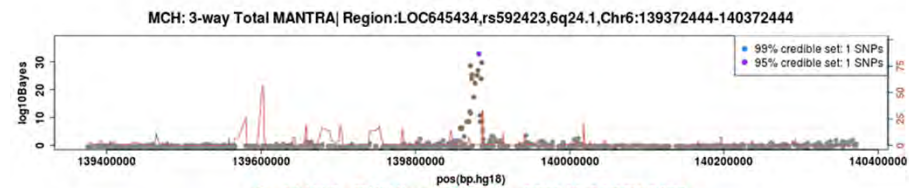

Top total SNP rs592423 Hapmap MAF: Asian=0.2722, AA=0.475, EU=0.4583

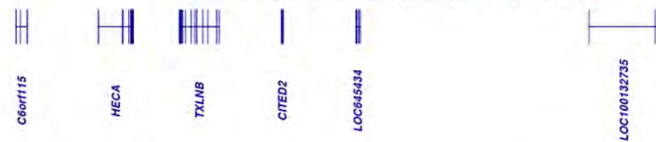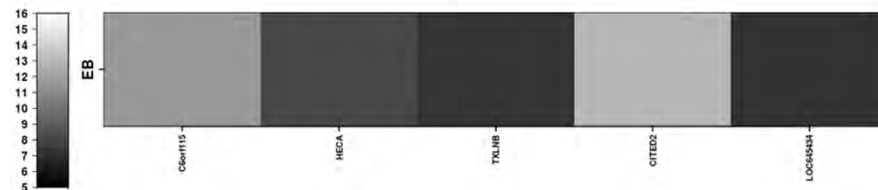

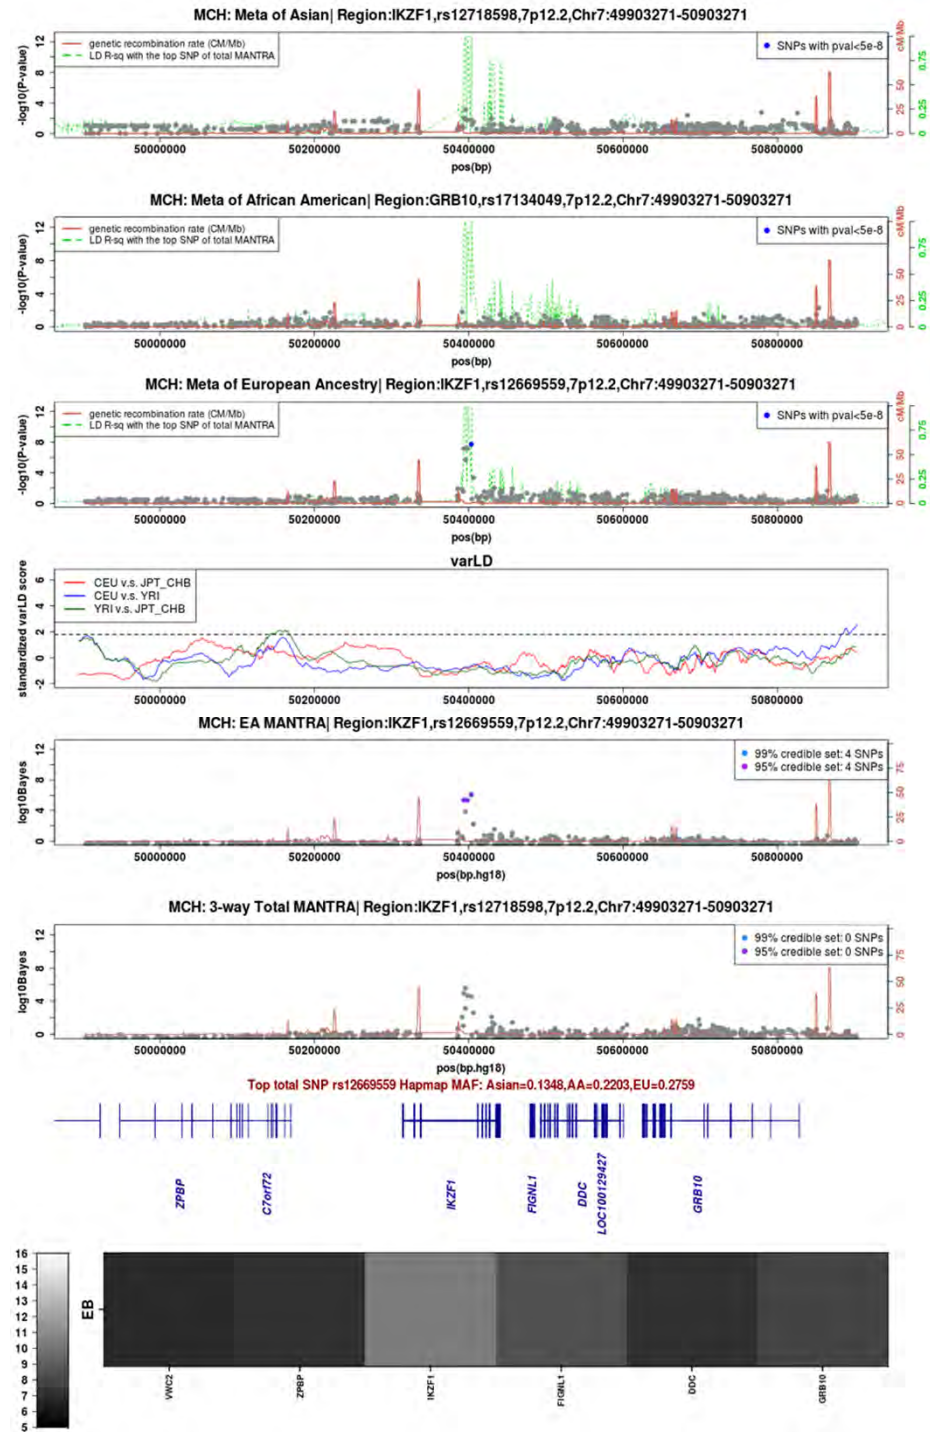

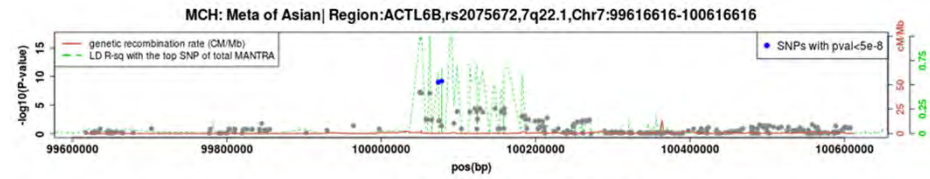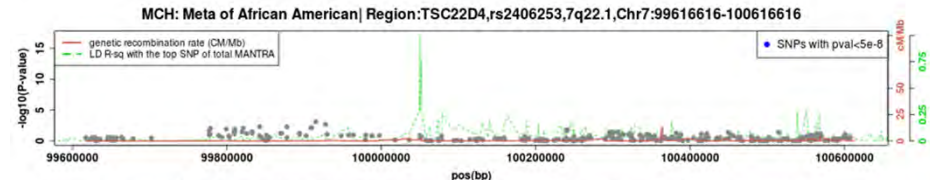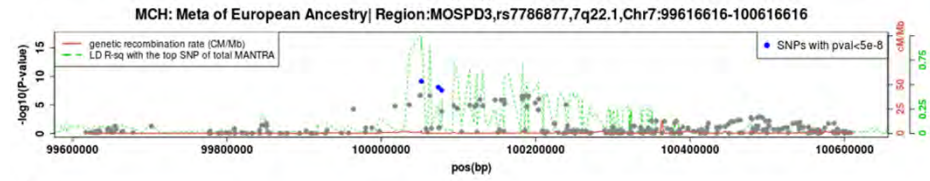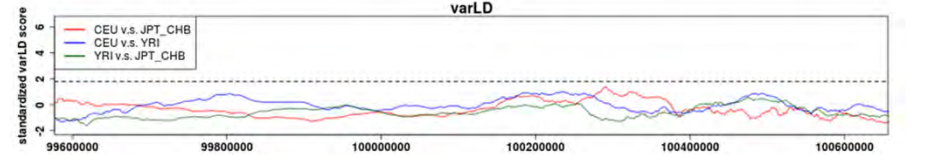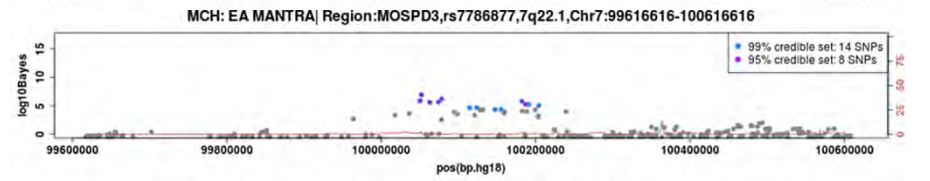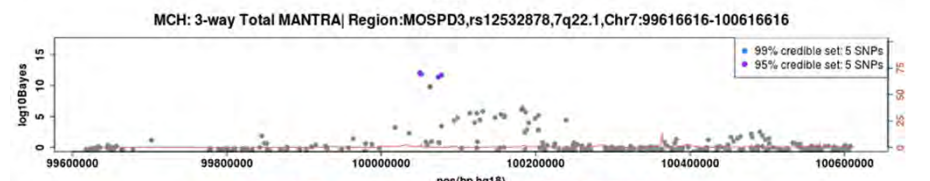

Top total SNP rs12532878 Hapmap MAF: Asian=0.09551,AA=0.1695,EU=0.1833

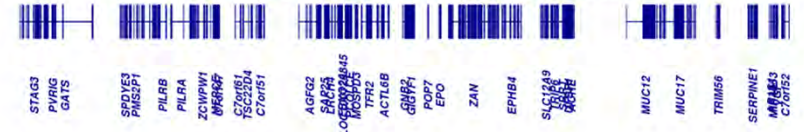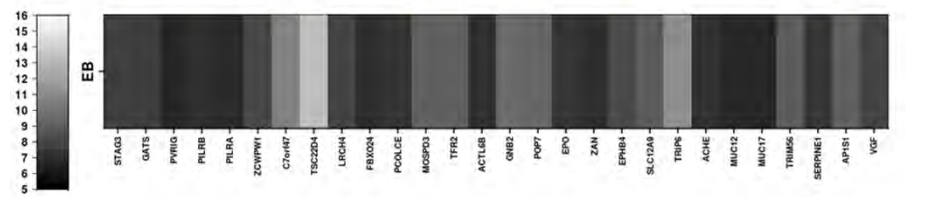

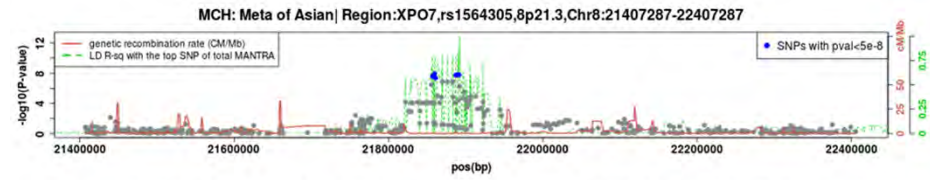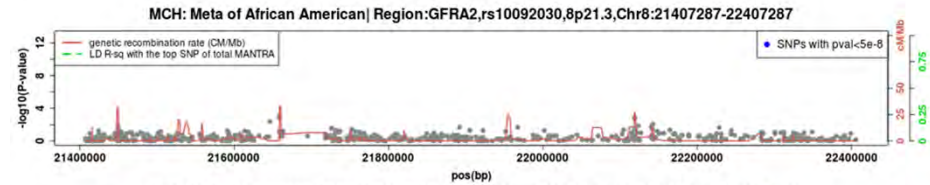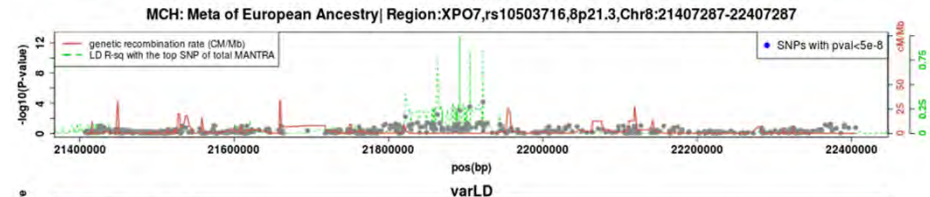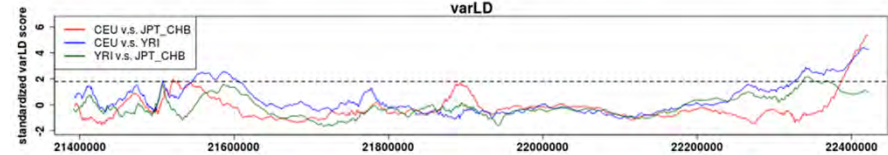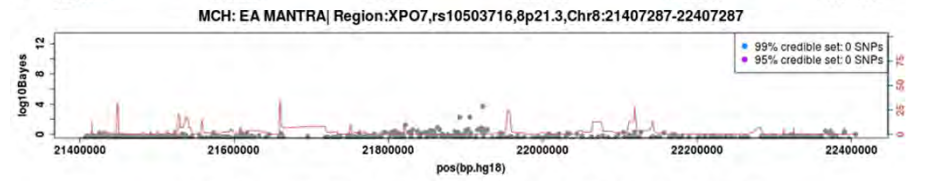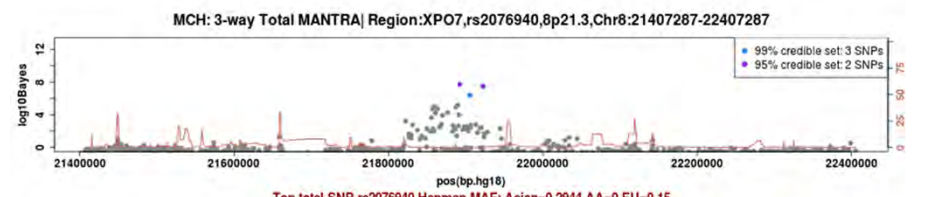

Top total SNP rs2076940 Hapmap MAF: Asian=0.2944,AA=0,EU=0.15

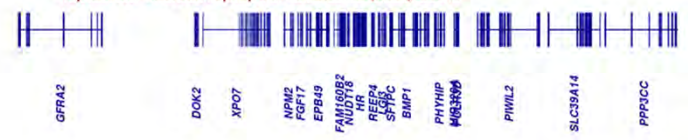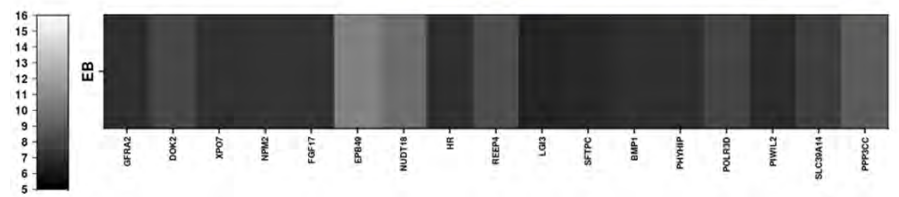

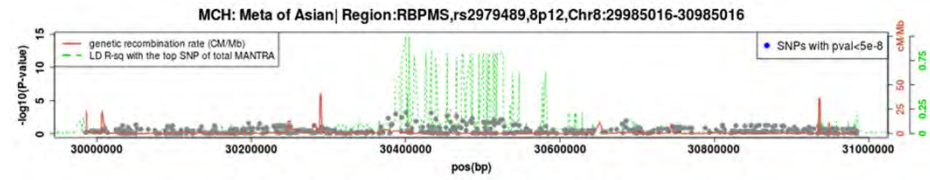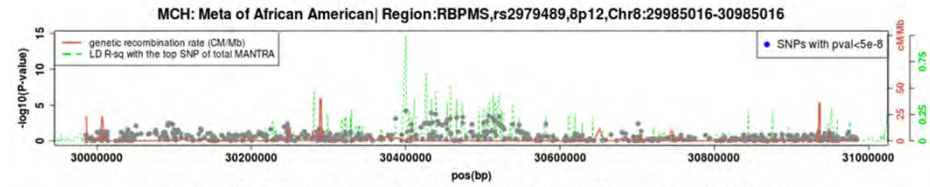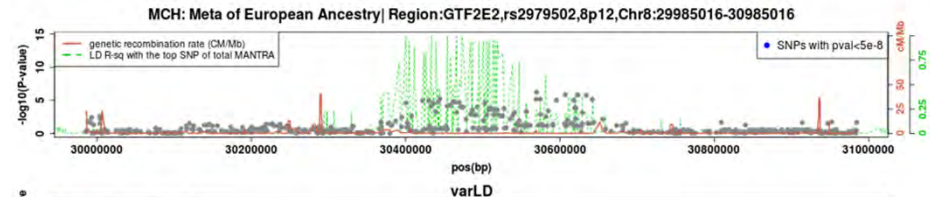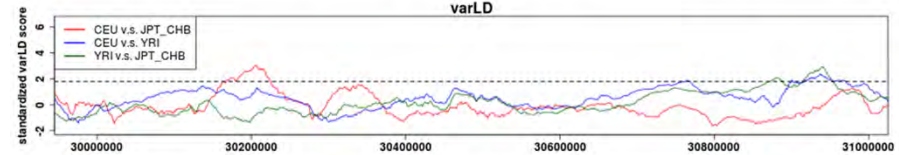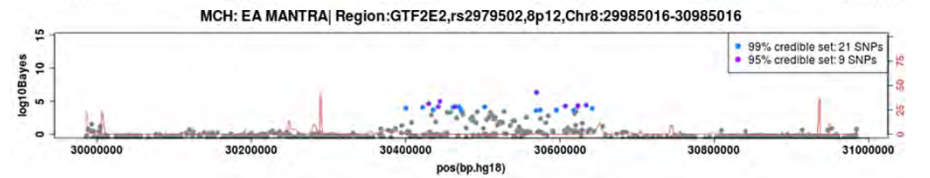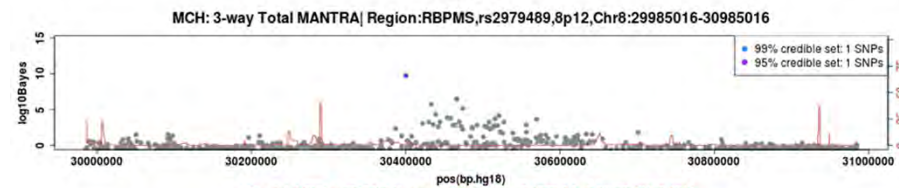

Top total SNP rs2979489 Hapmap MAF: Asian=0.1573, AA=0.03333, EU=0.1917

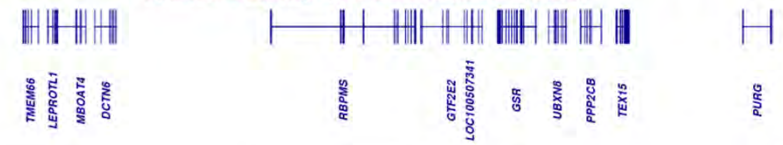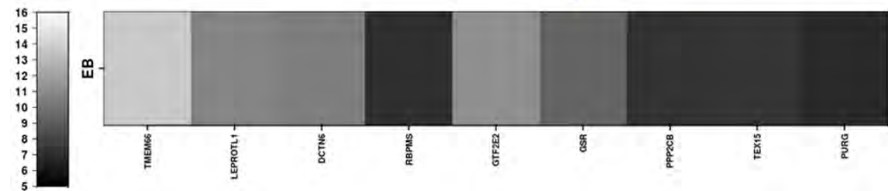

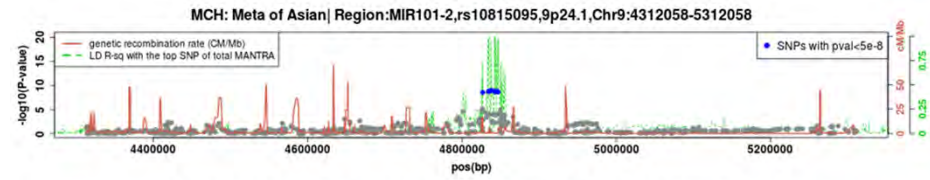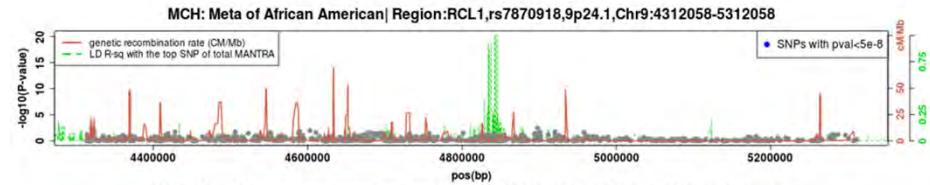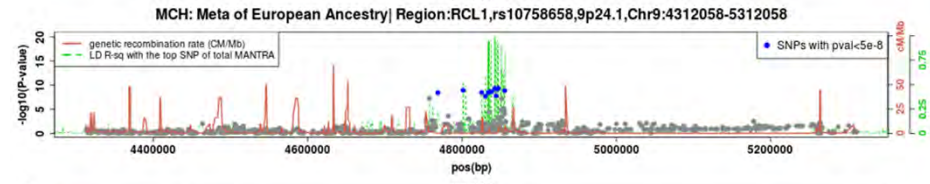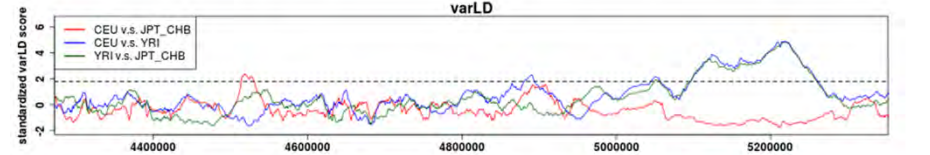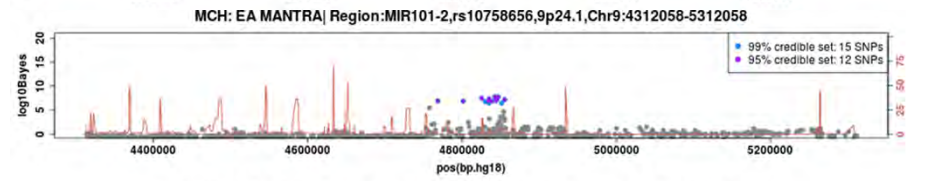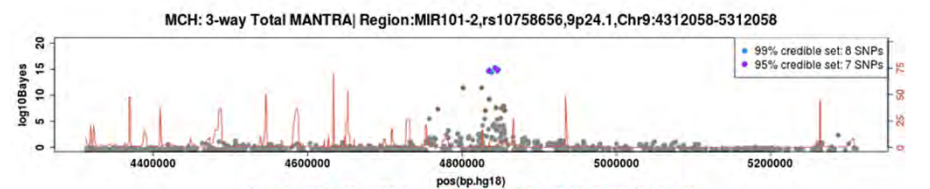

Top total SNP rs10758656 Hapmap MAF: Asian=0.4944, AA=0.1333, EU=0.2018

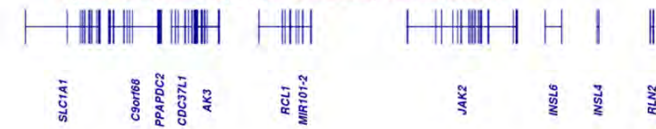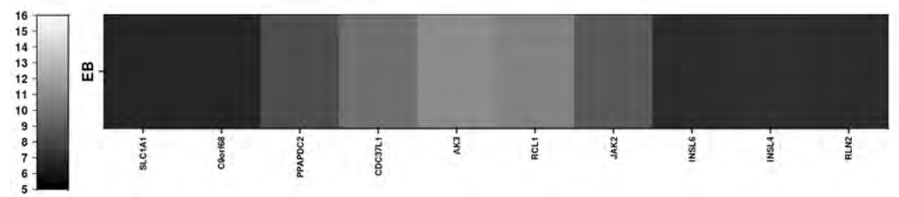

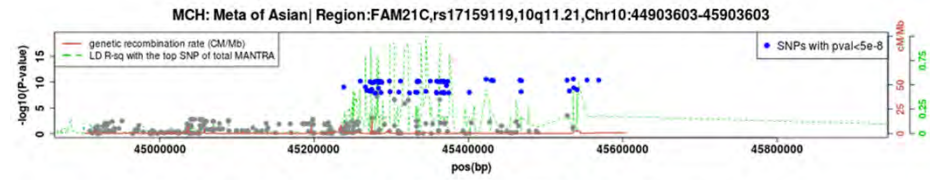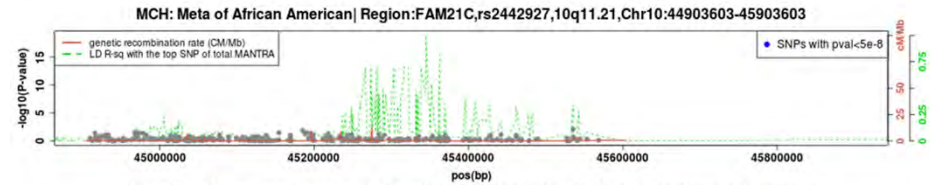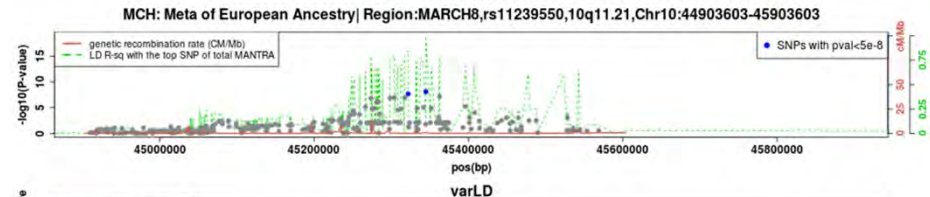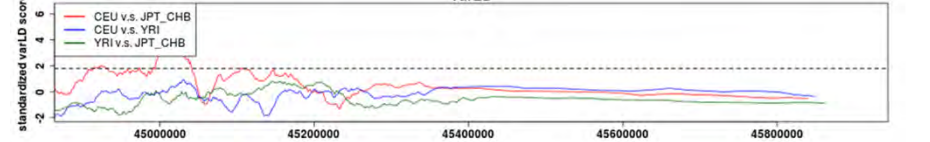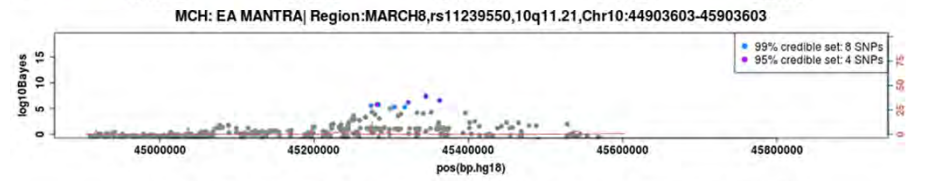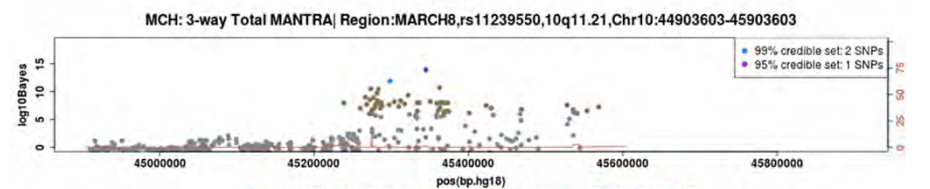

Top total SNP rs11239550 Hapmap MAF: Asian=0.2222, AA=0.2368, EU=0.2288

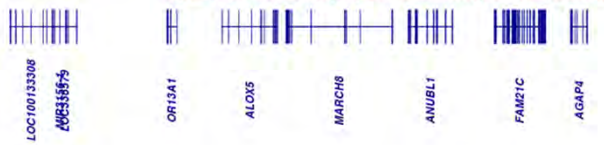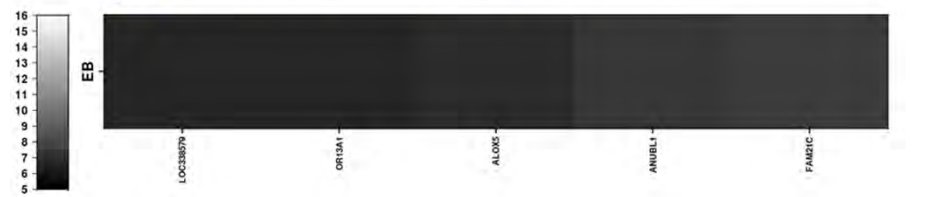

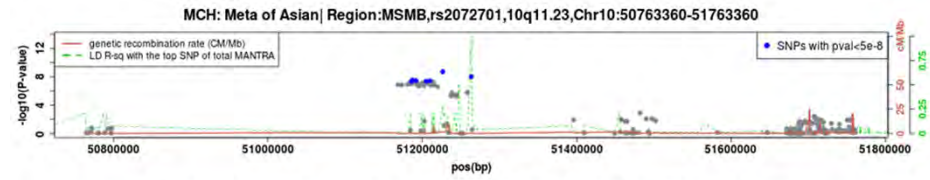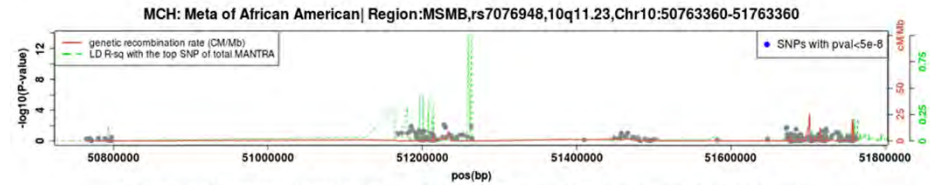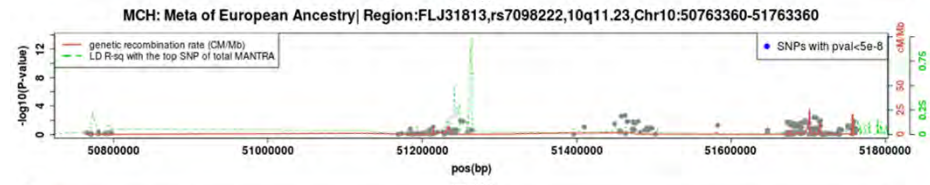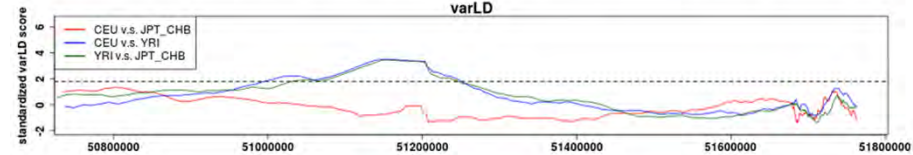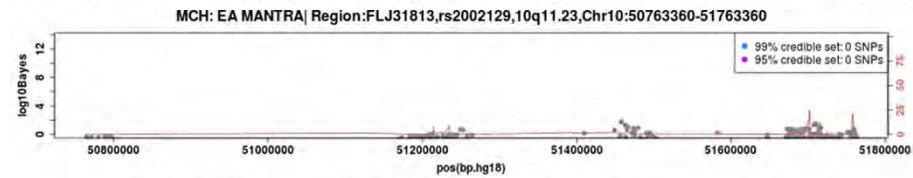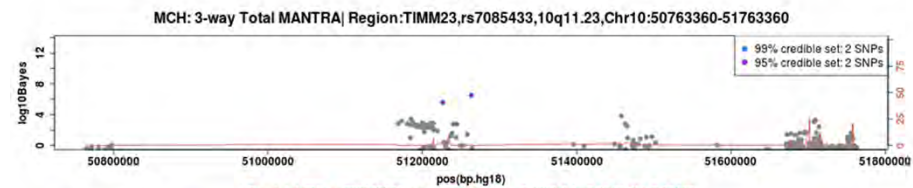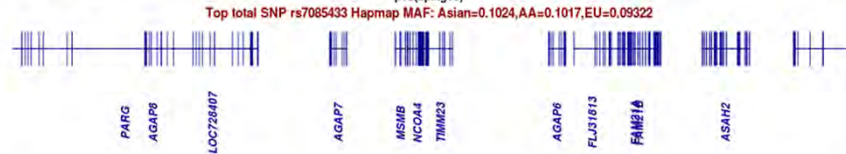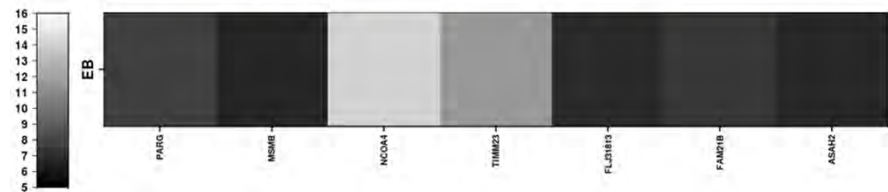



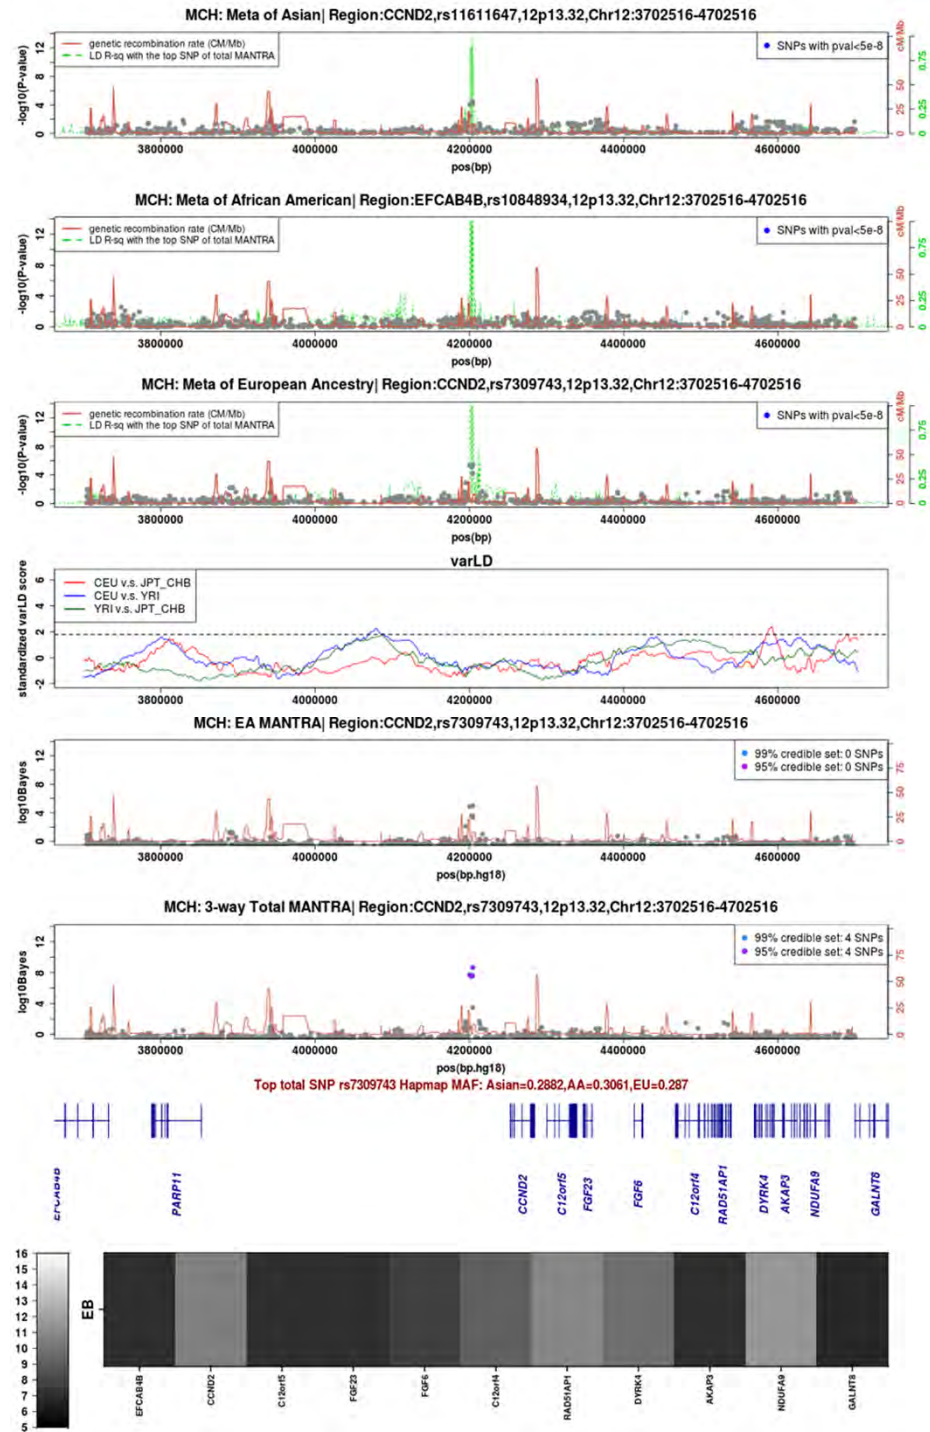

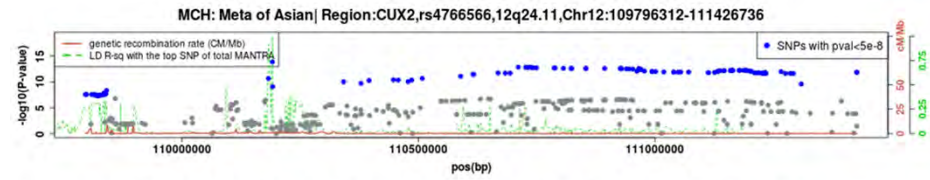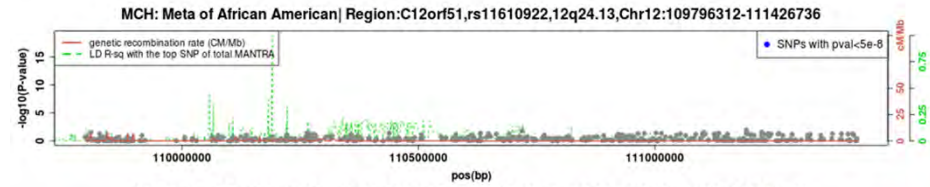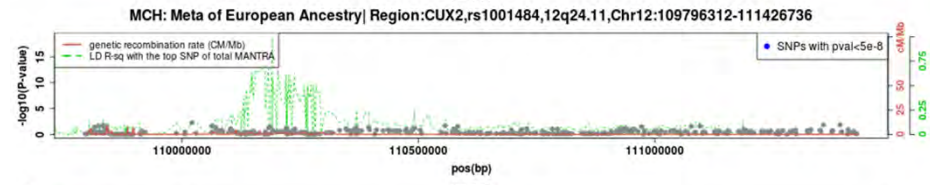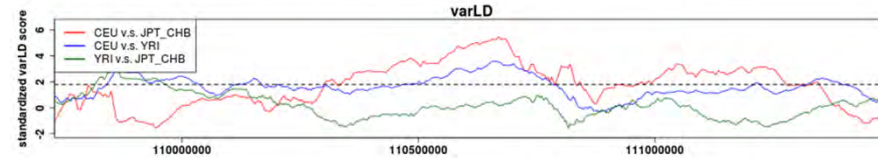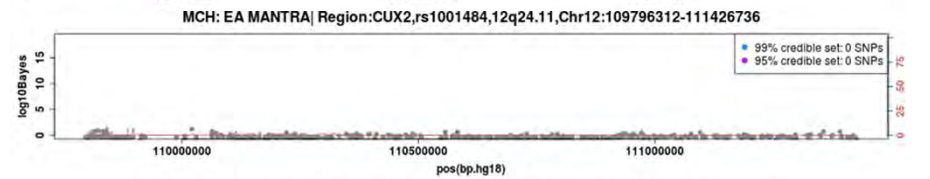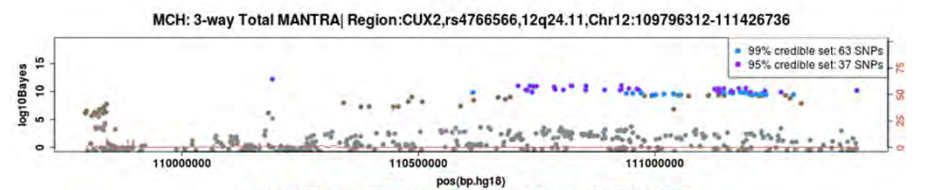

Top total SNP rs4766566 Hapmap MAF: Asian=0.3038, AA=0.1604, EU=0.2596

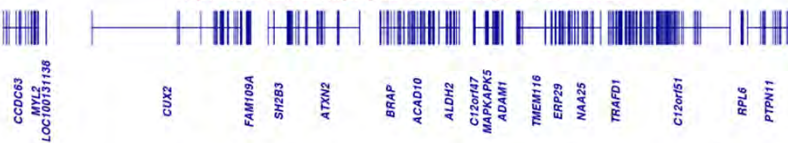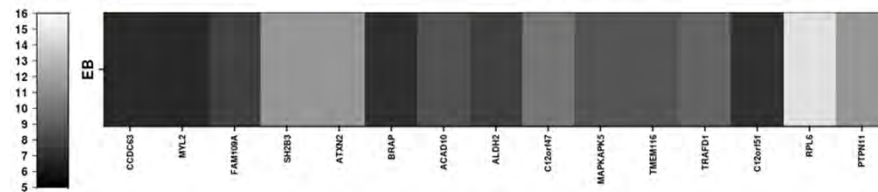

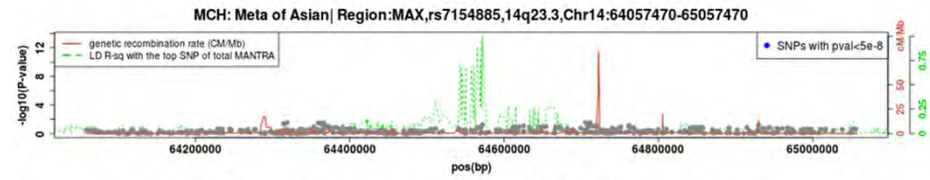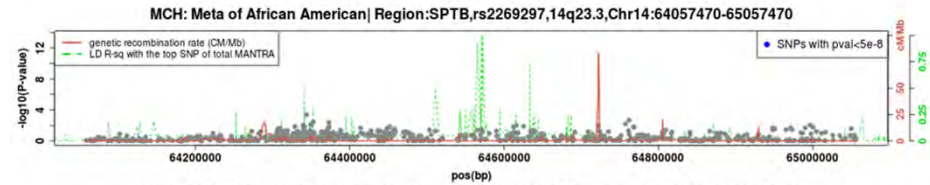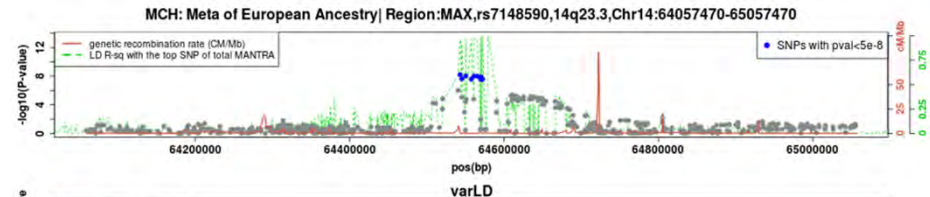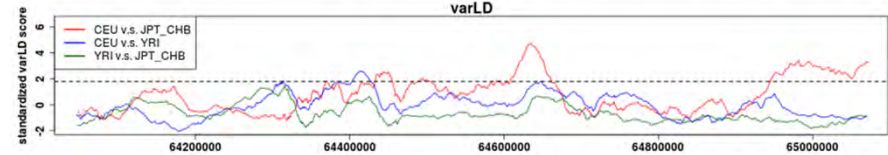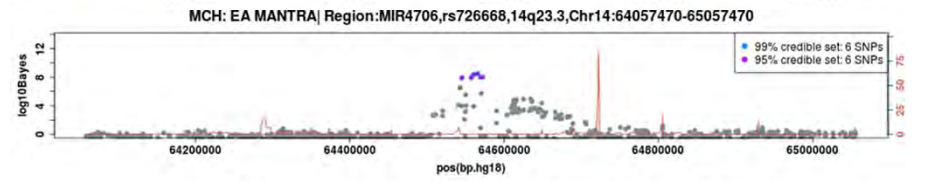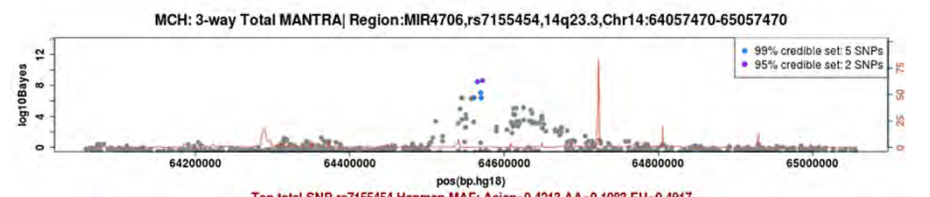

Top total SNP rs7155454 Hapmap MAF: Asian=0.4213, AA=0.1083, EU=0.4917

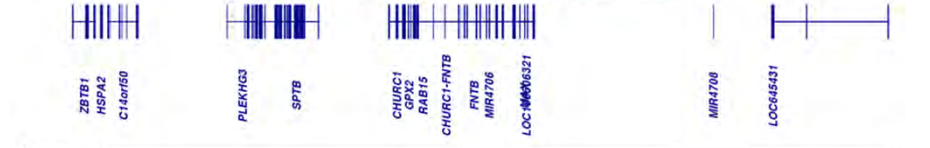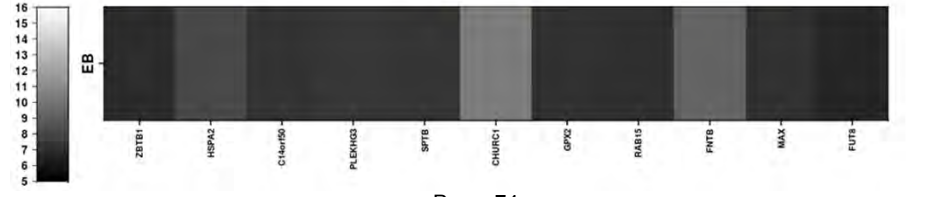

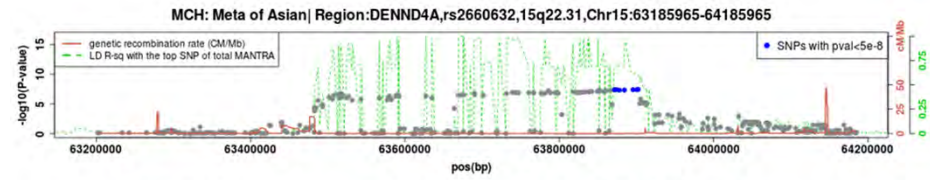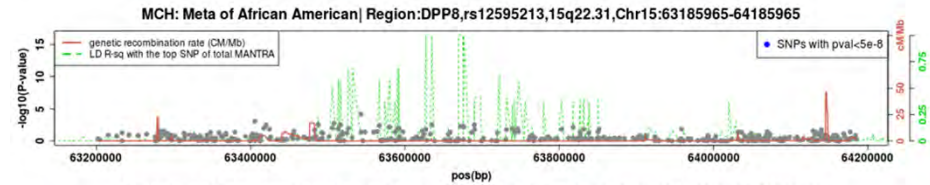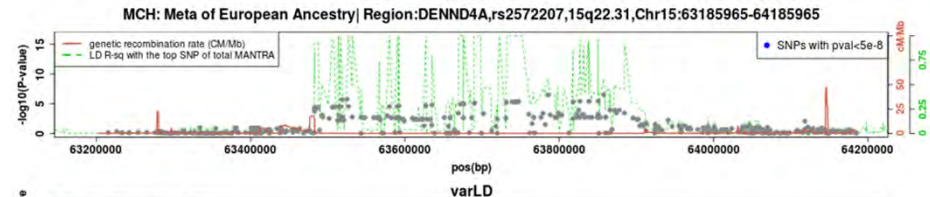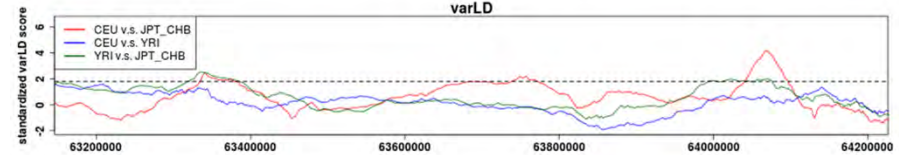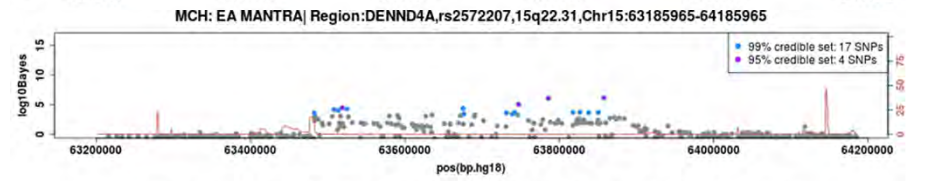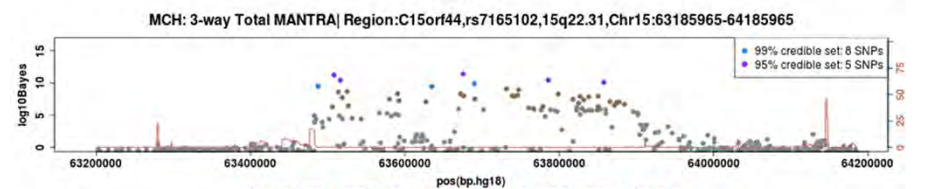

Top total SNP rs7165102 Hapmap MAF: Asian=0.2303, AA=0.04237, EU=0.3879

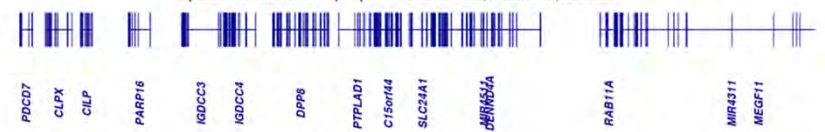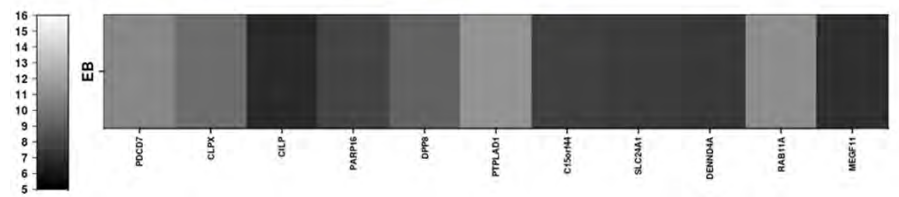

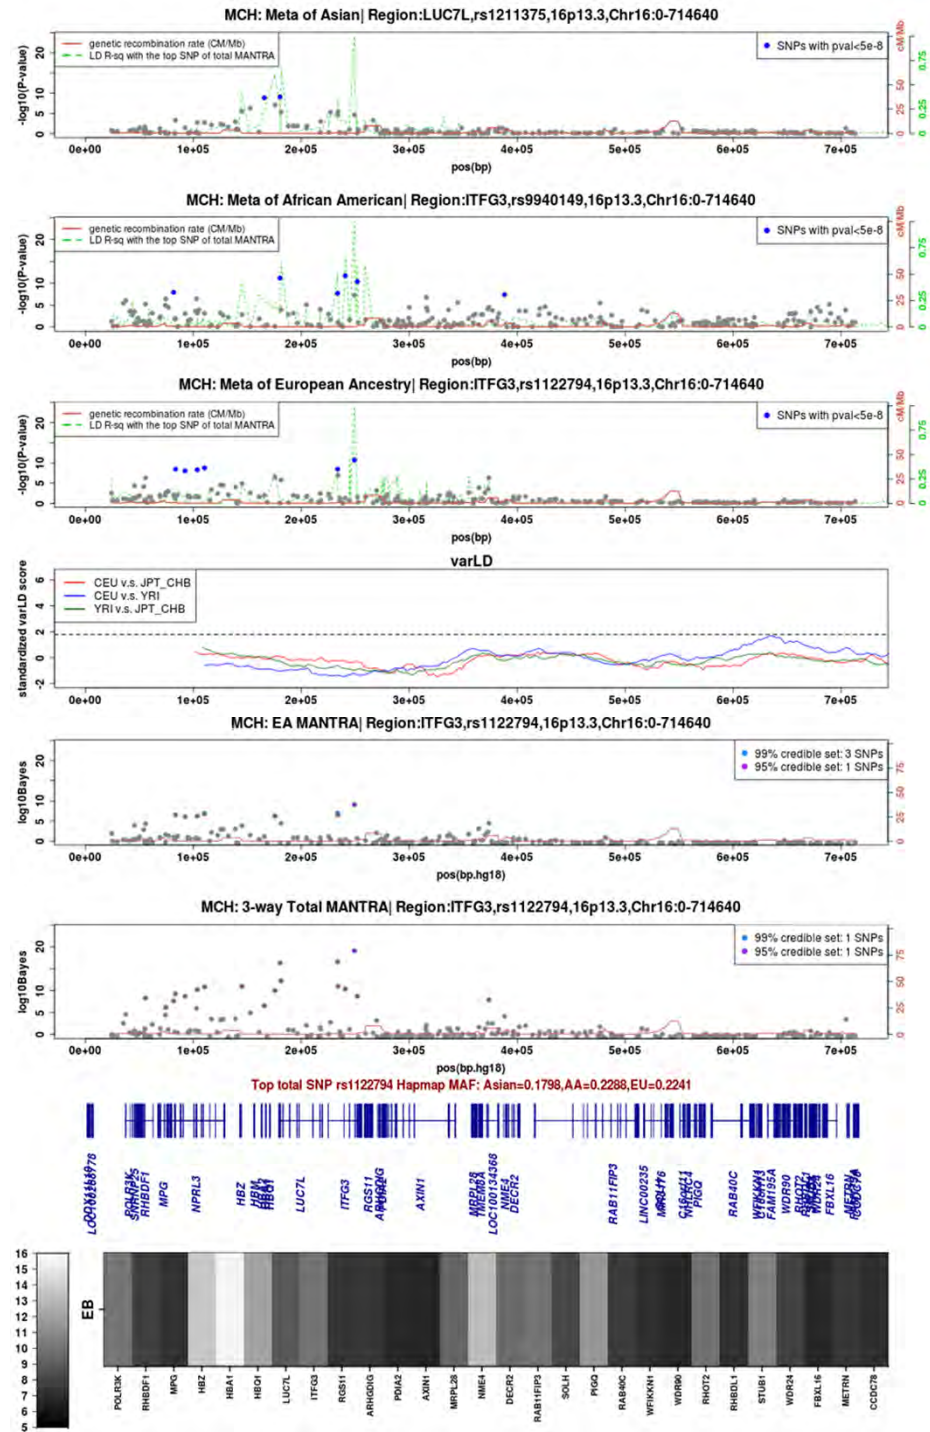



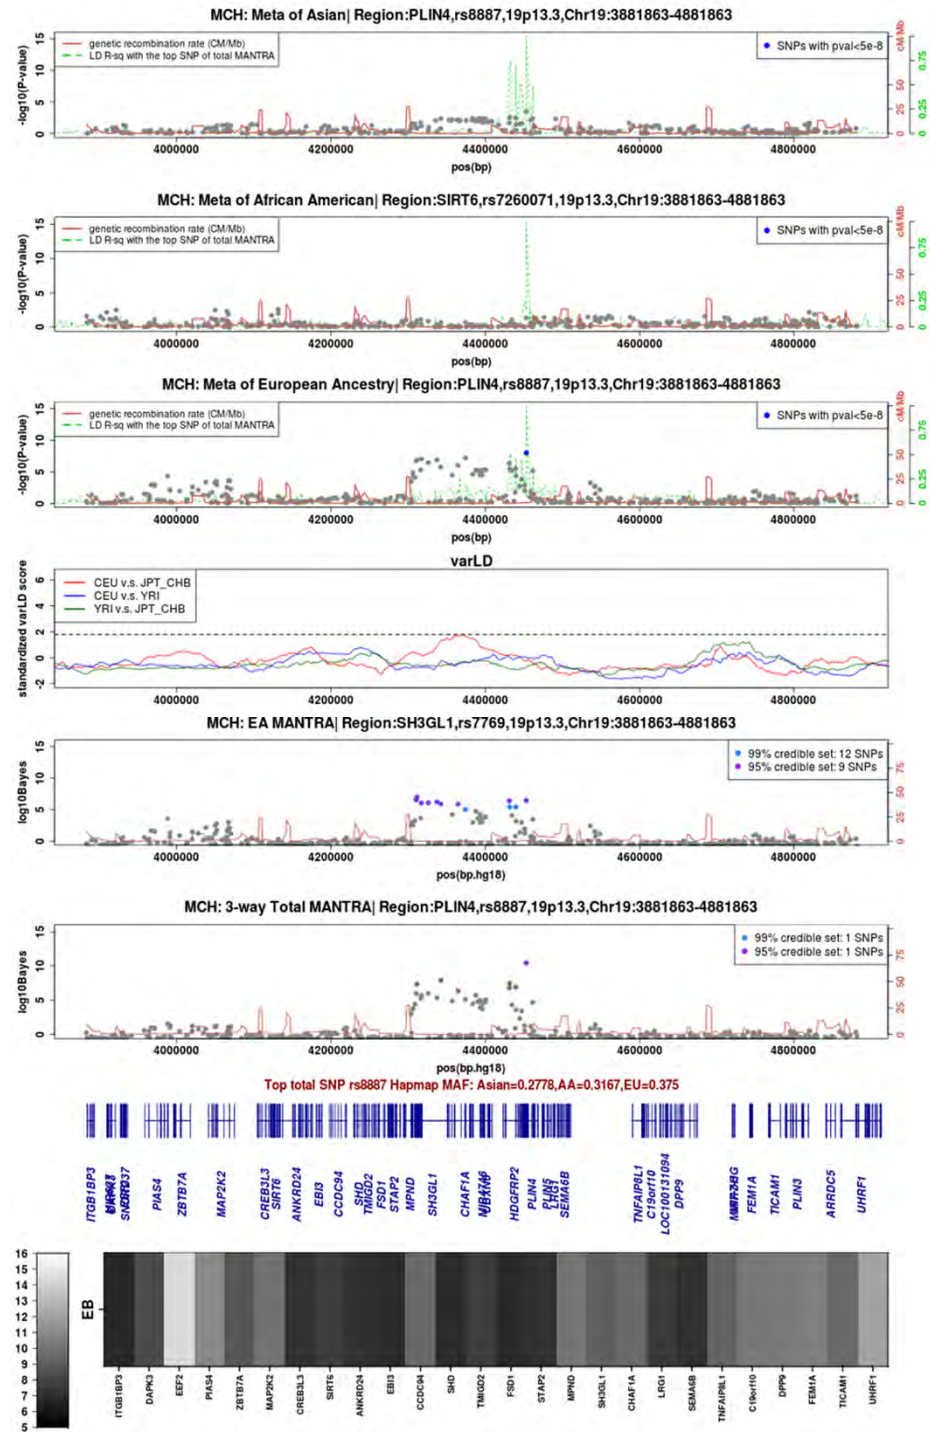

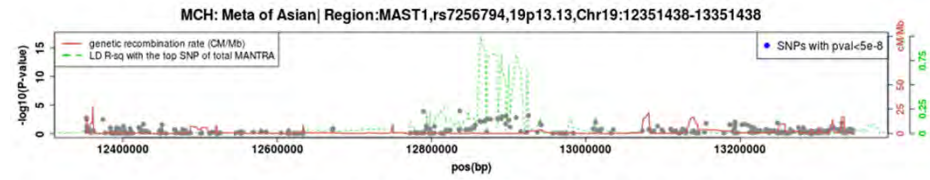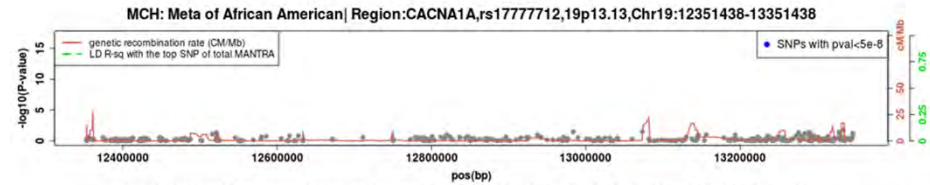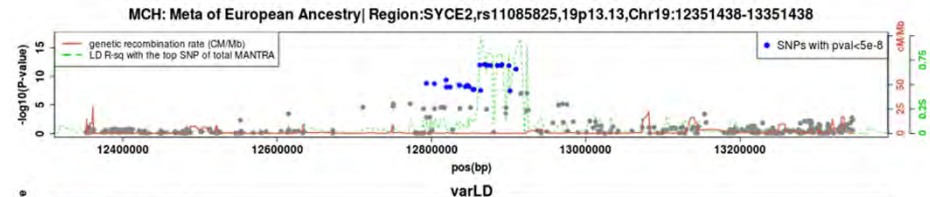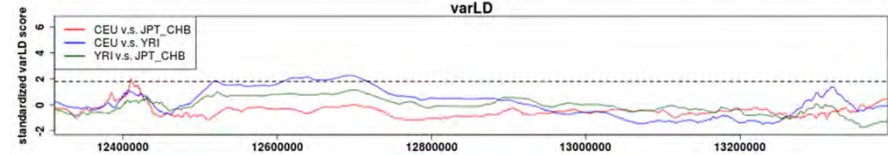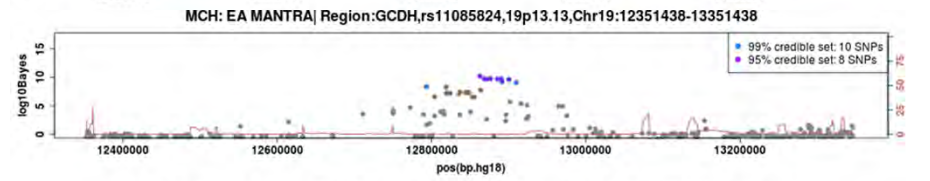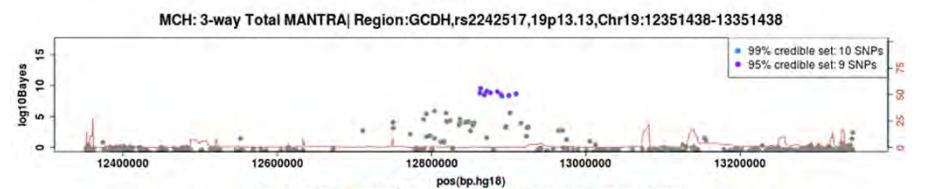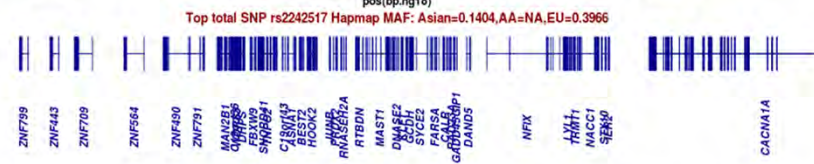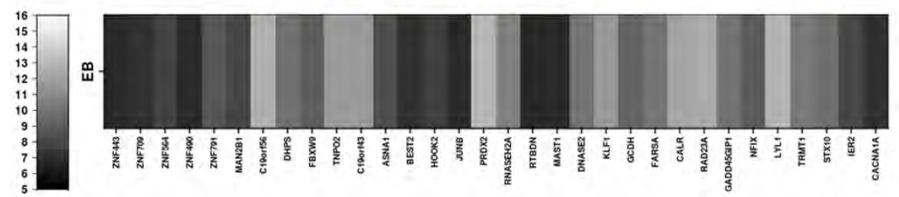



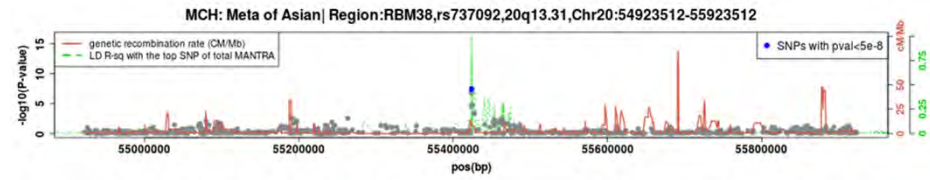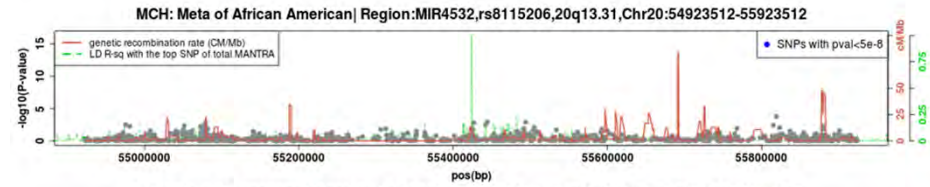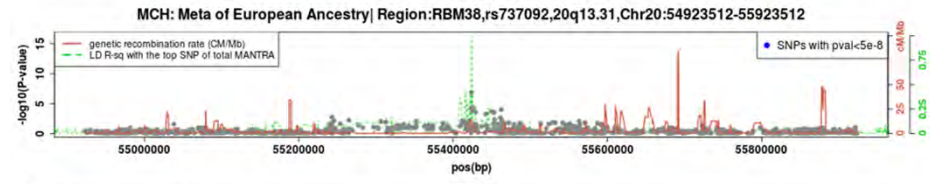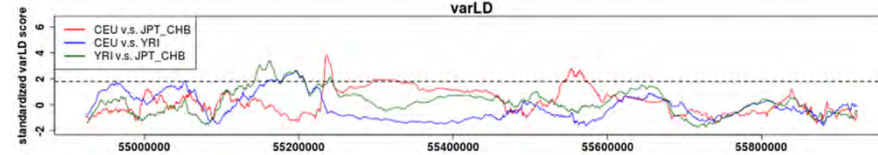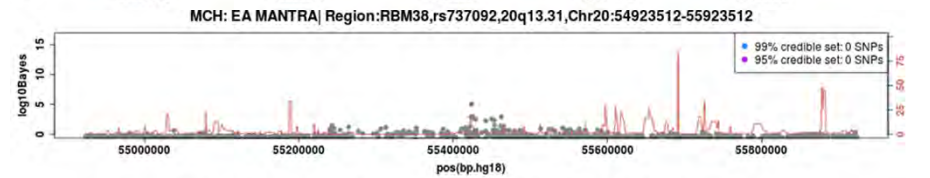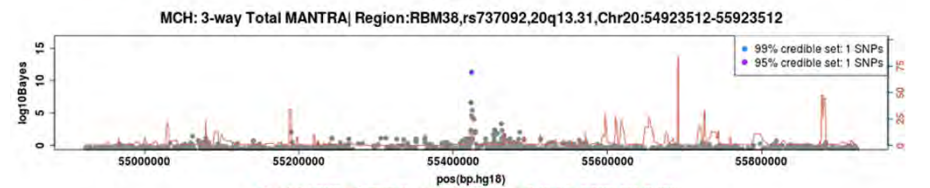

Top total SNP rs737092 Hapmap MAF: Asian=0.45, AA=0.2167, EU=0.4583

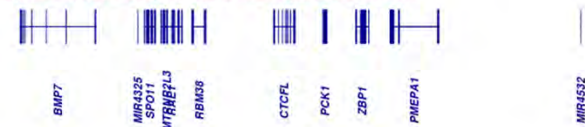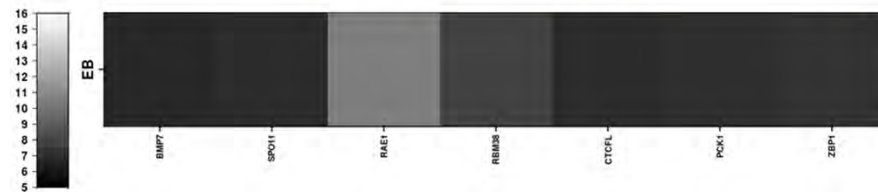

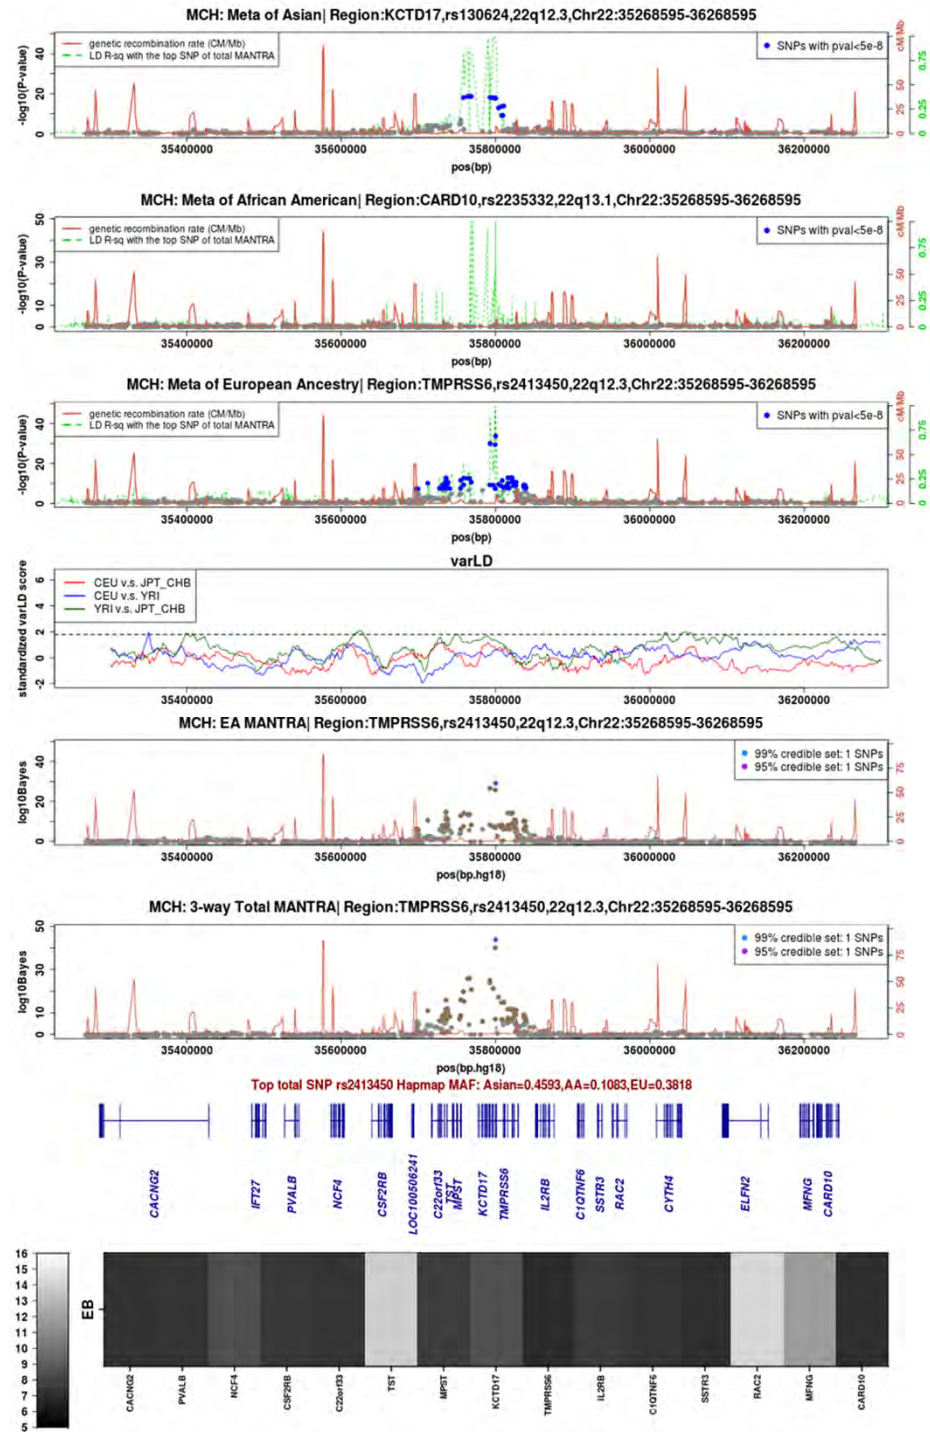

**MCV**

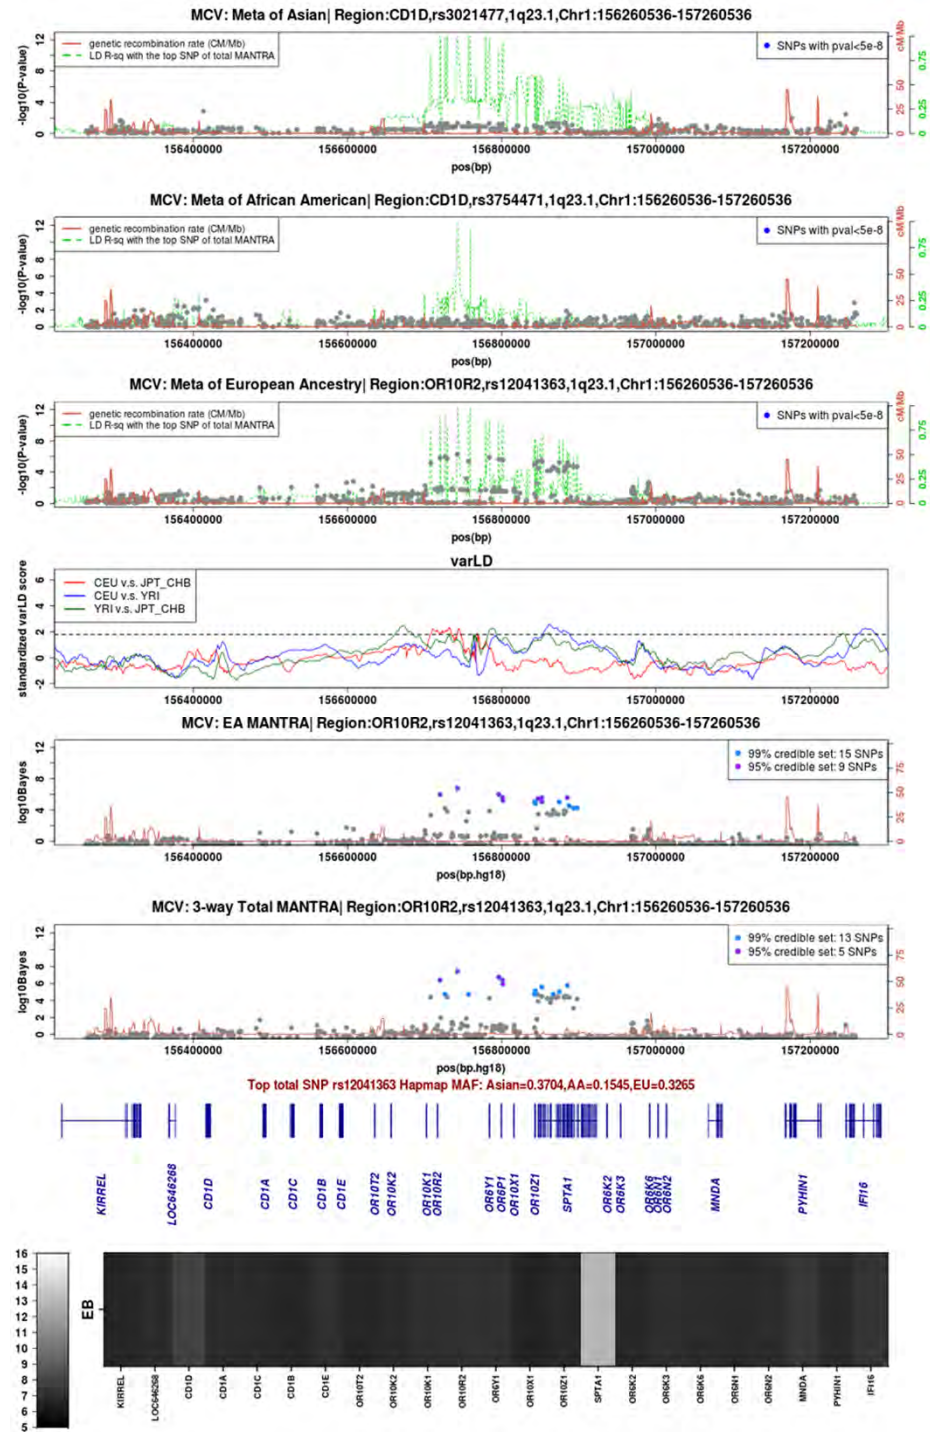

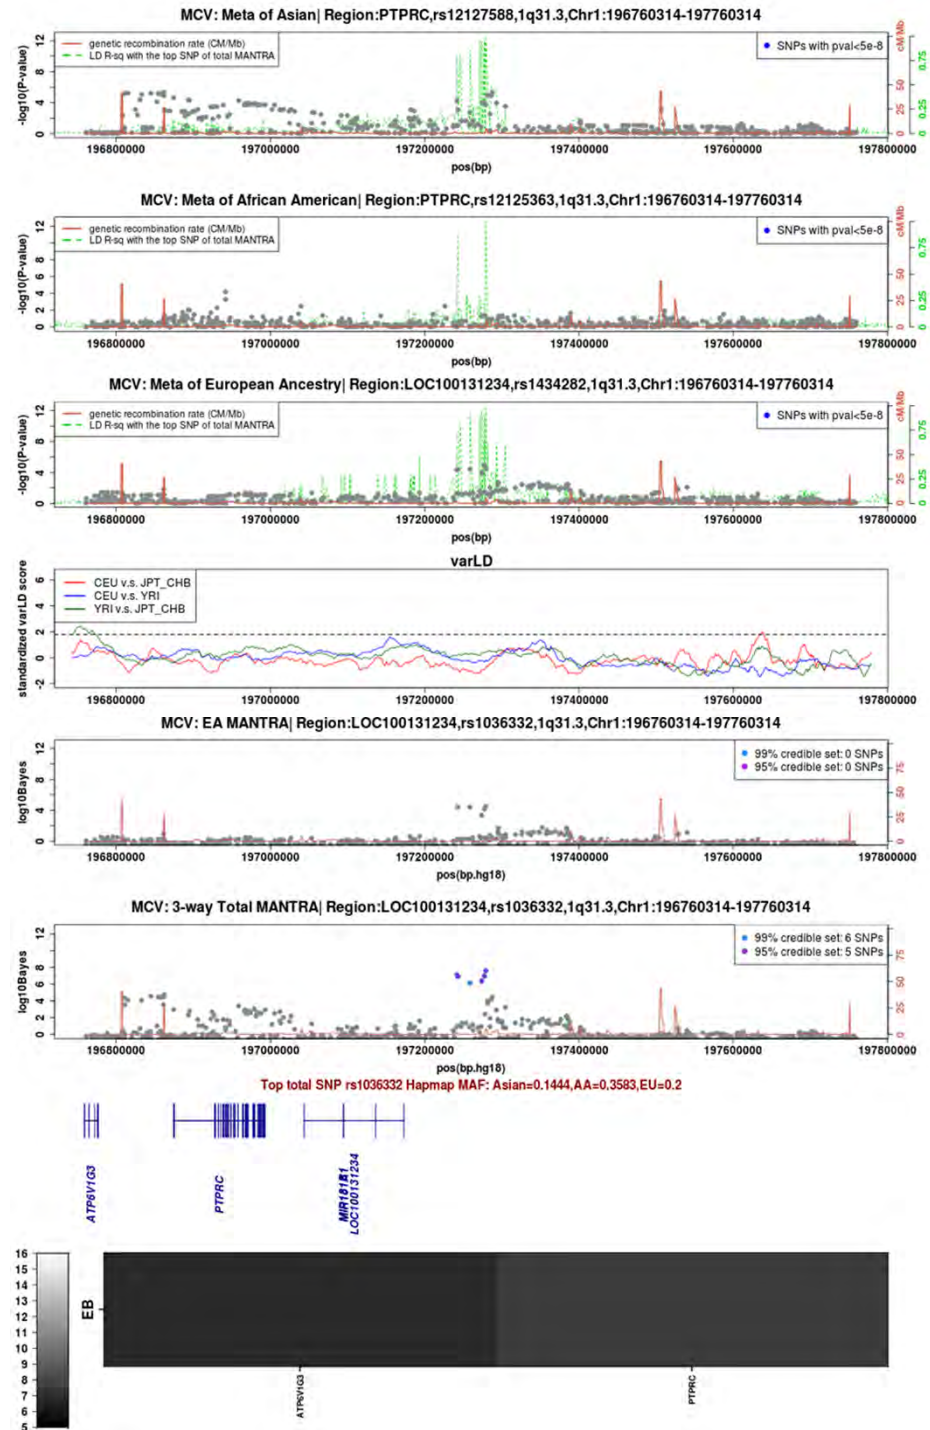

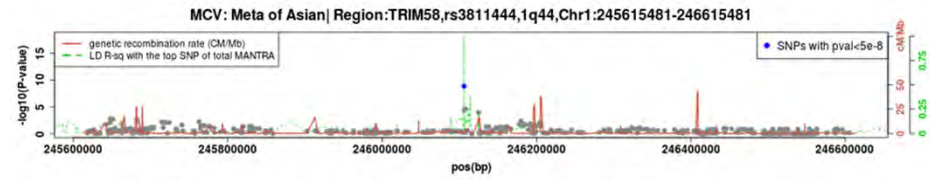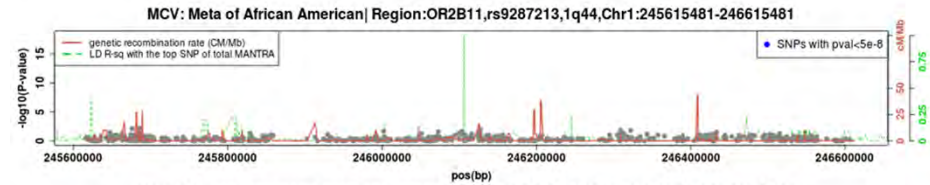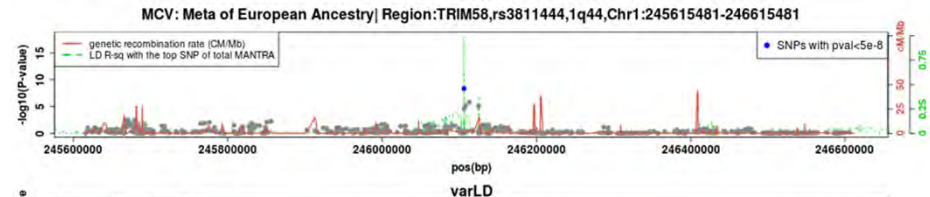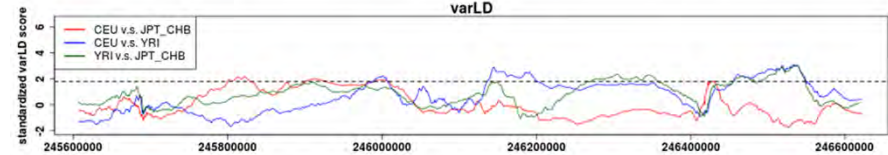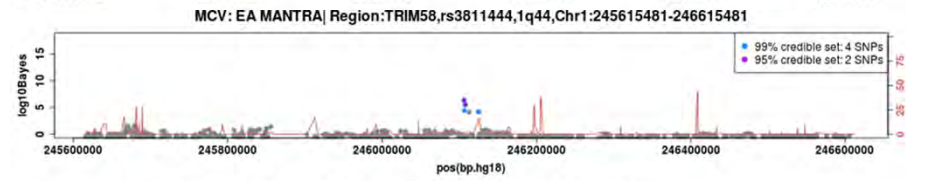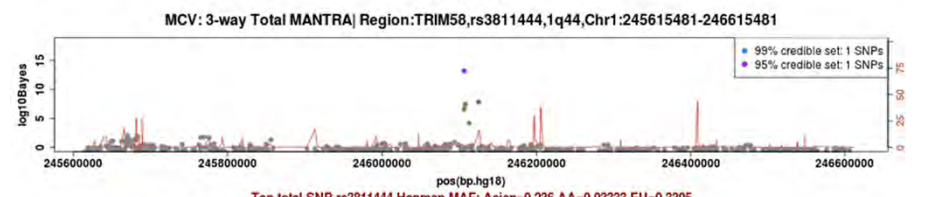

Top total SNP rs3811444 Hapmap MAF: Asian=0.236,AA=0.03333,EU=0.3305

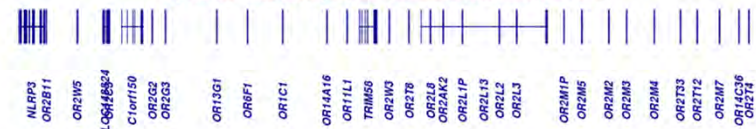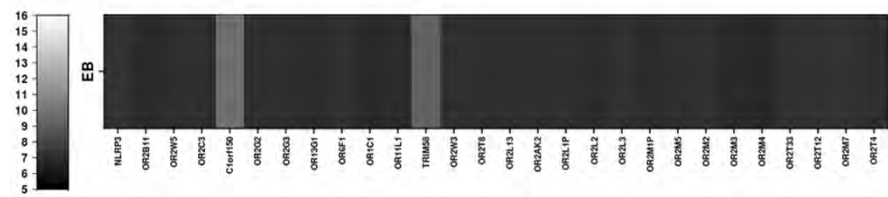

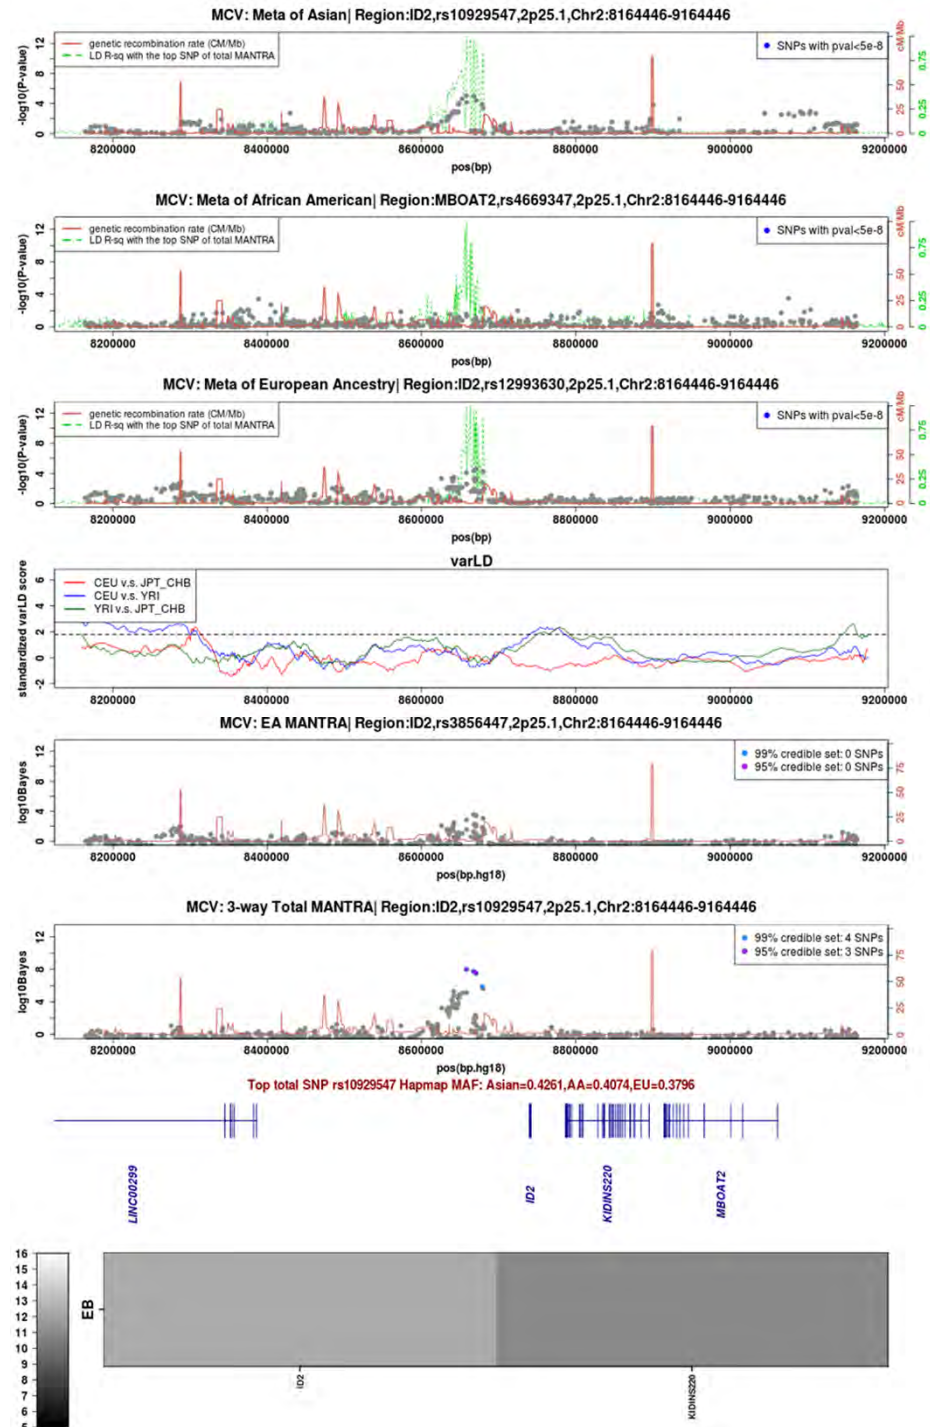

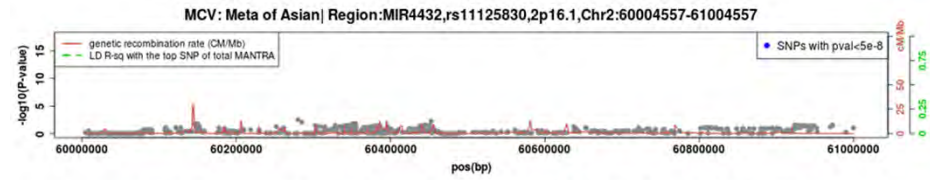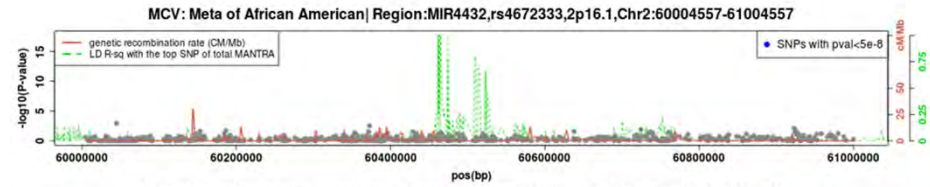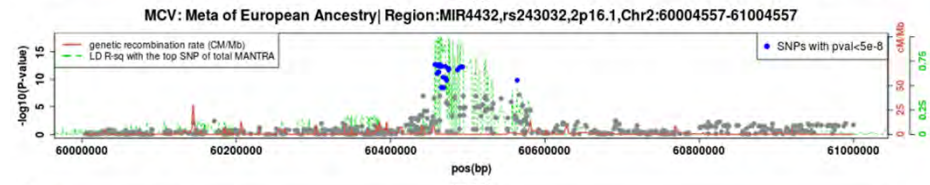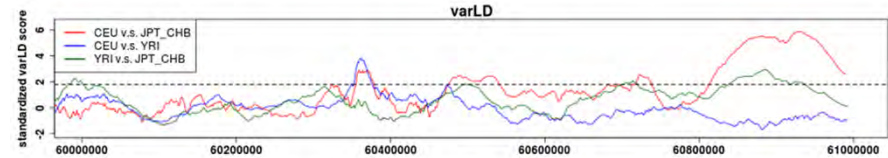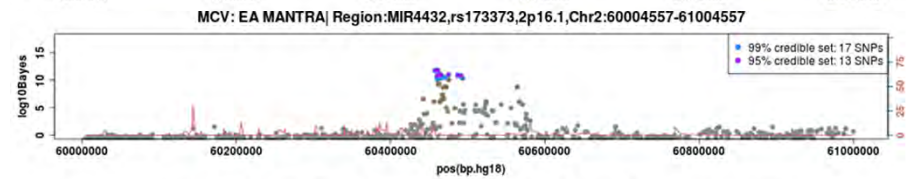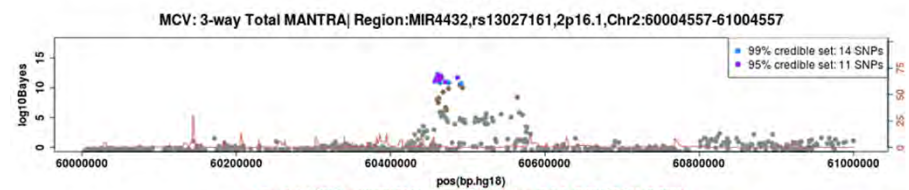

Top total SNP rs13027161 Hapmap MAF: Asian=0, AA=0.08475, EU=0.4333

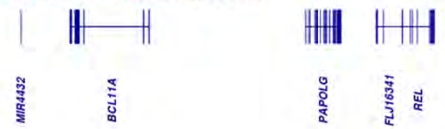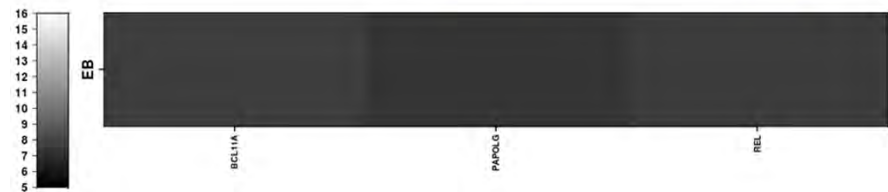



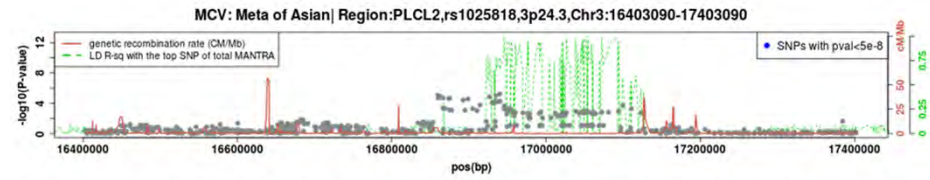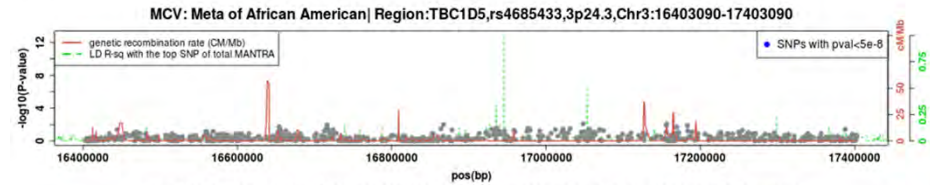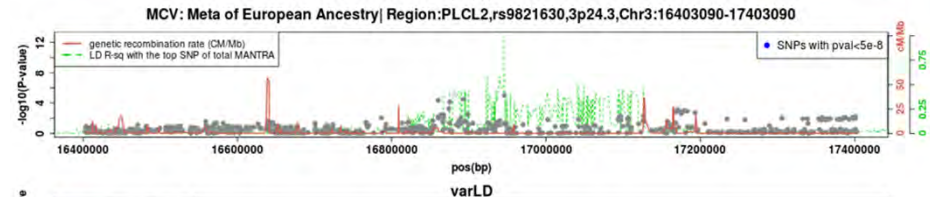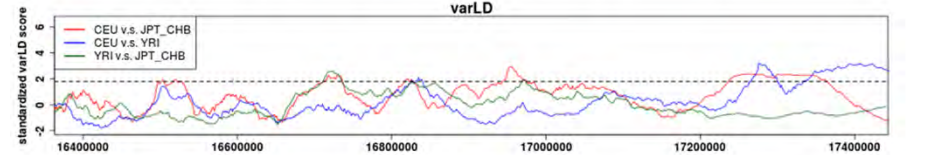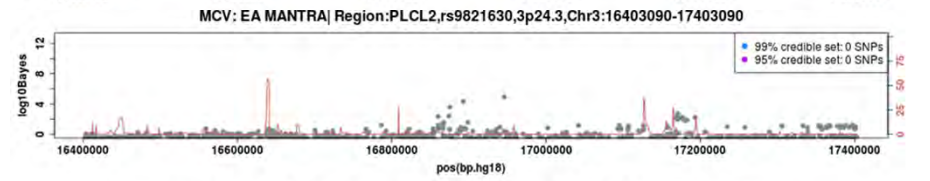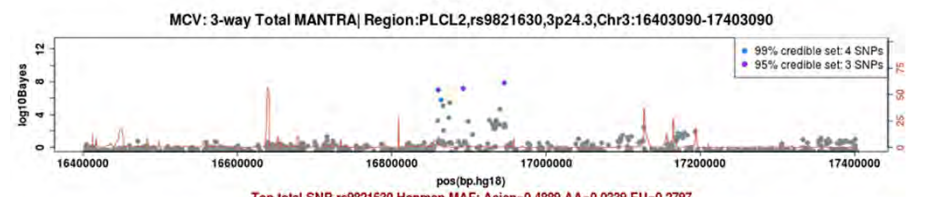

Top total SNP rs9821630 Hapmap MAF: Asian=0.4889, AA=0.0339, EU=0.2797

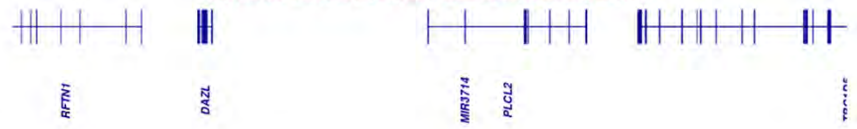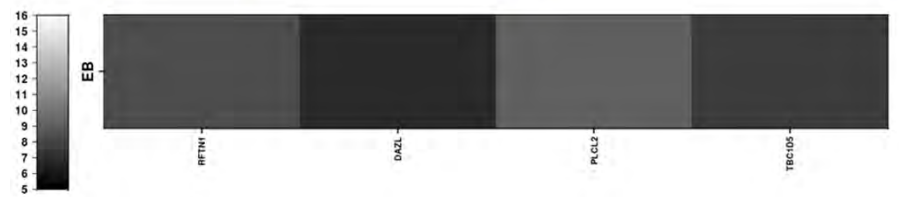

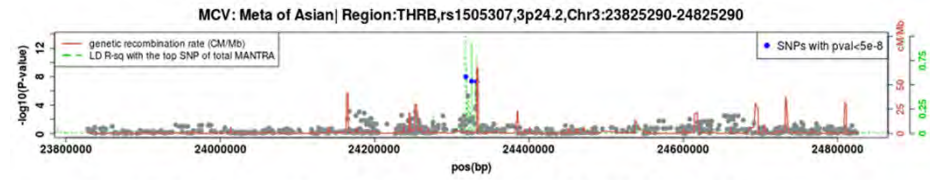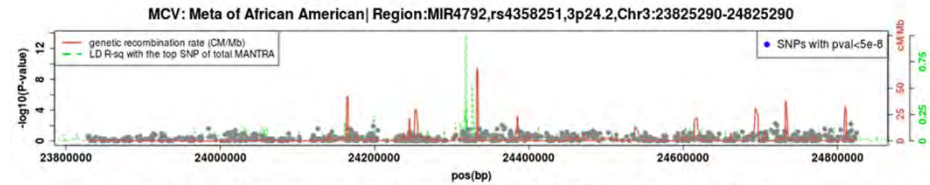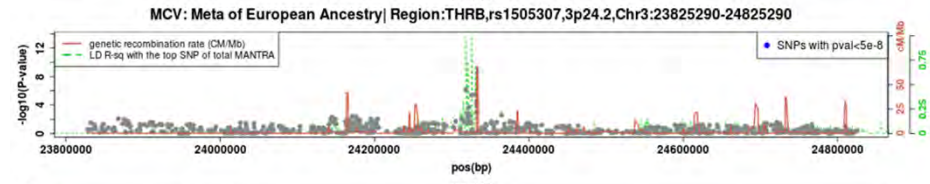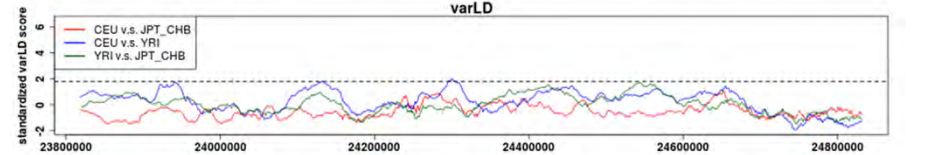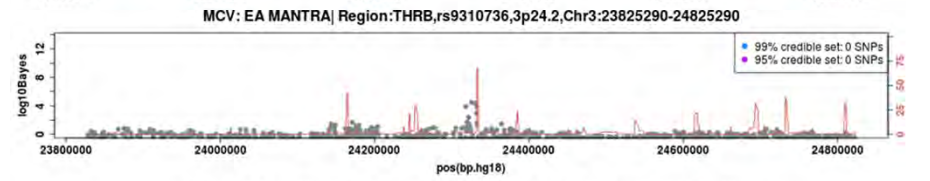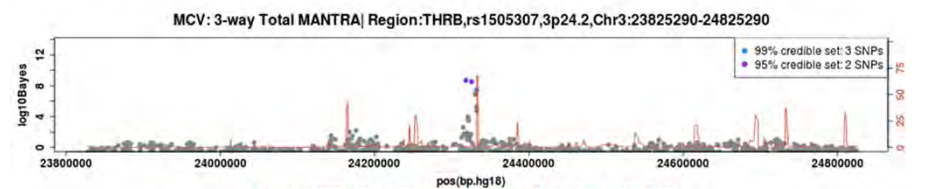

Top total SNP rs1505307 Hapmap MAF: Asian=0.2444,AA=0.4,EU=0.3667

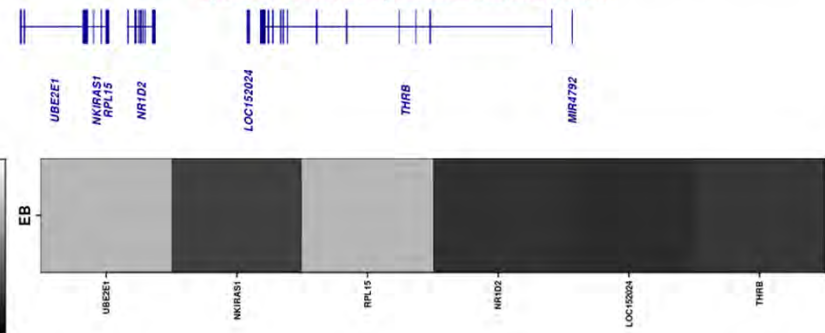

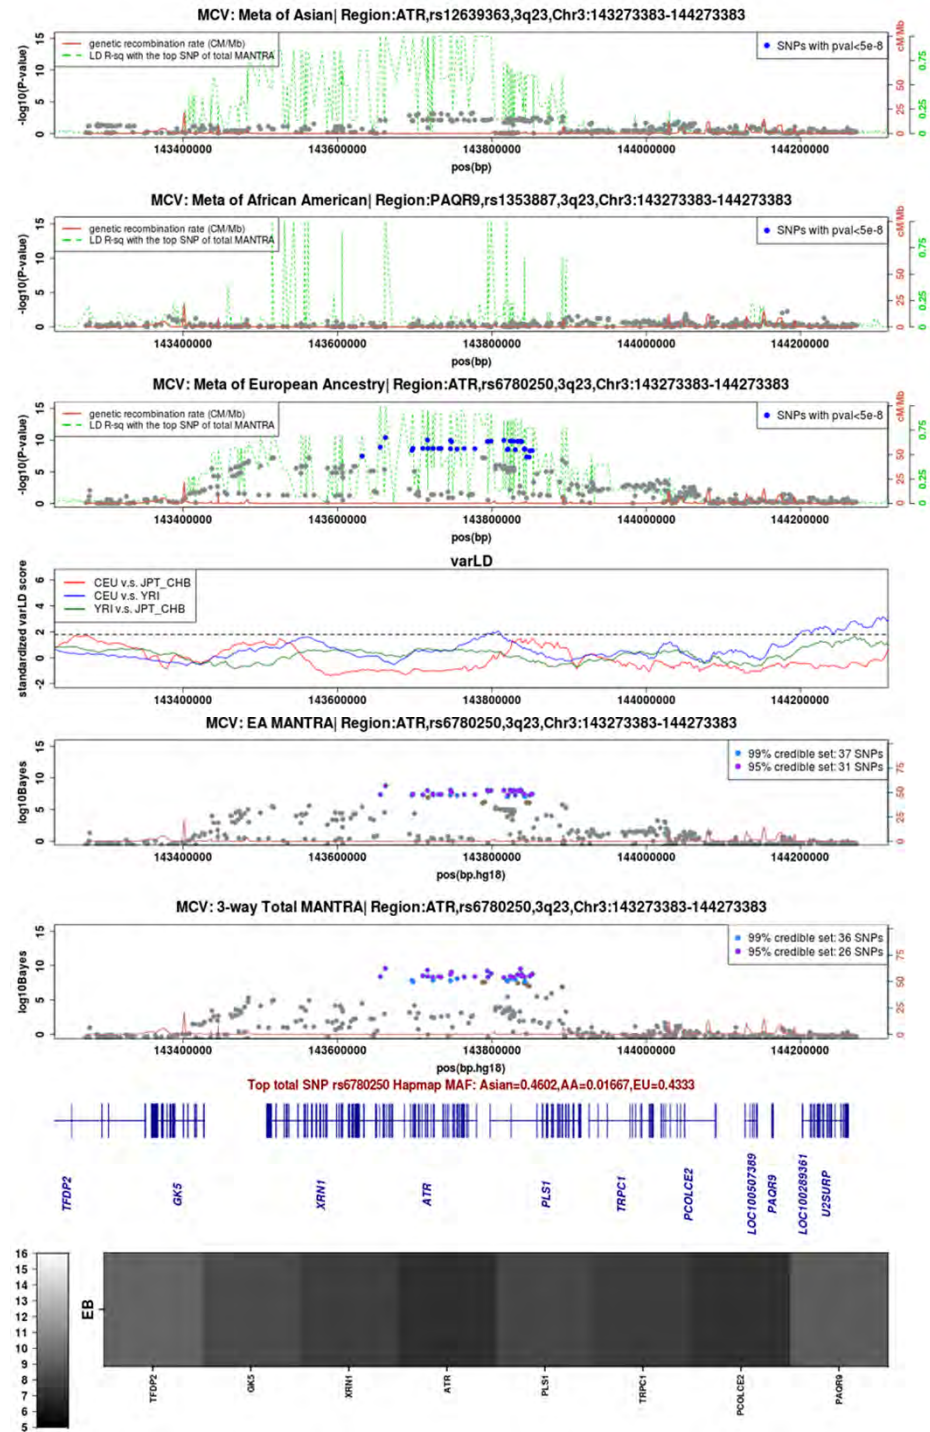

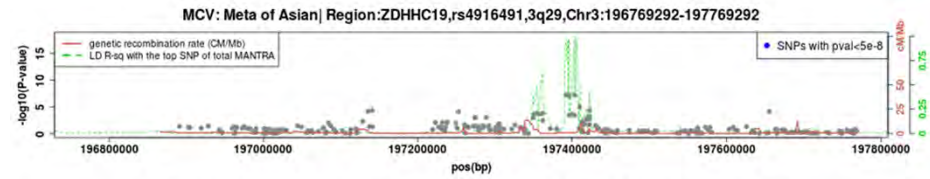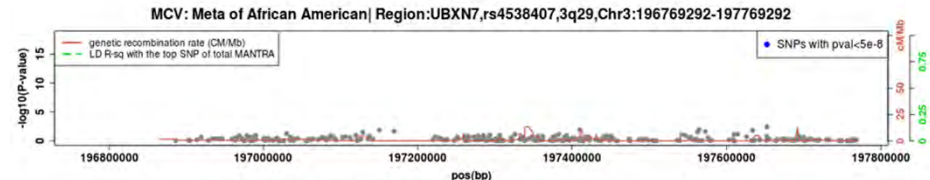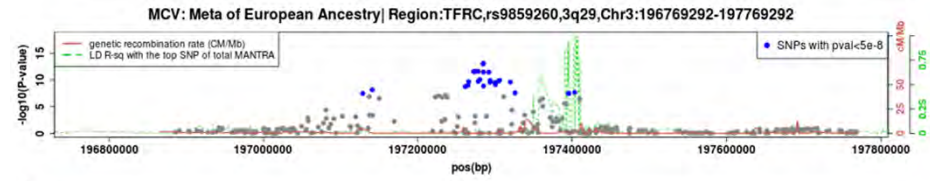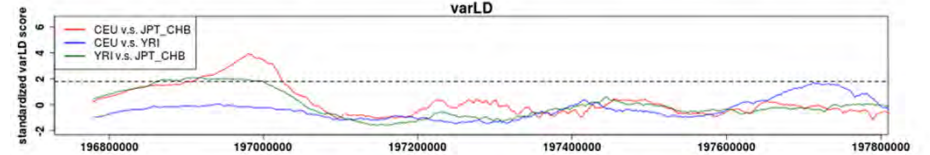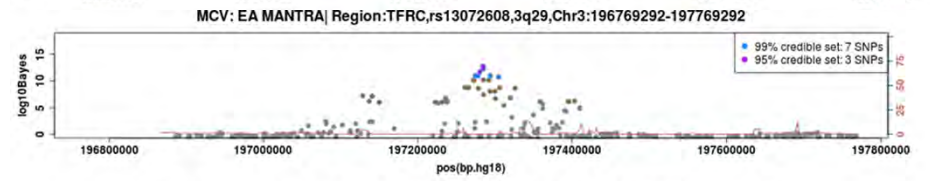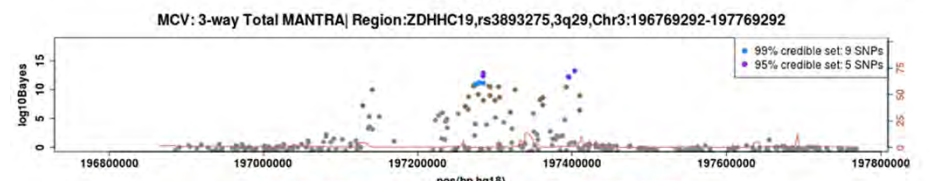

Top total SNP rs3893275 Hapmap MAF: Asian=0.4101,AA=0,EU=0.1695

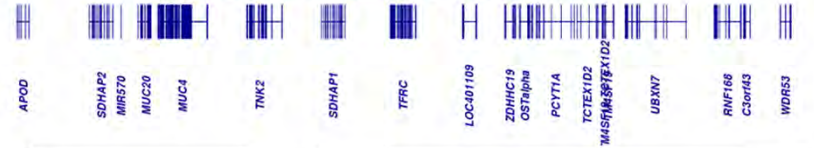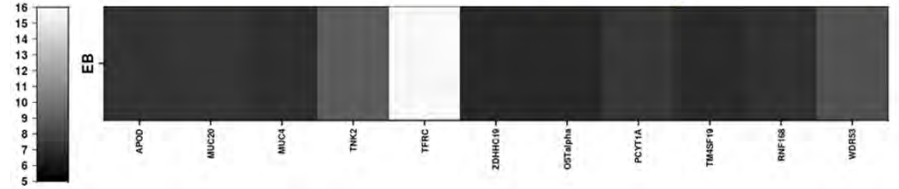

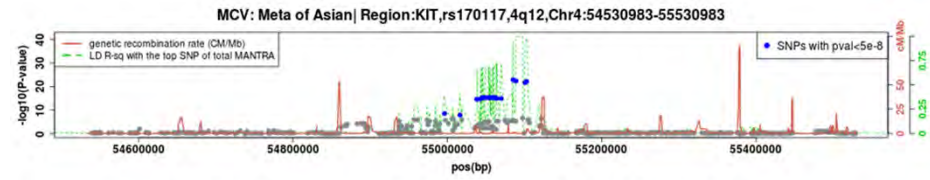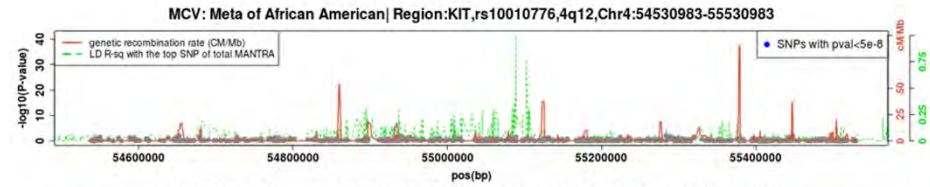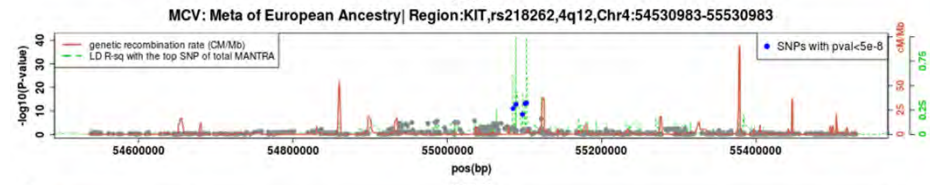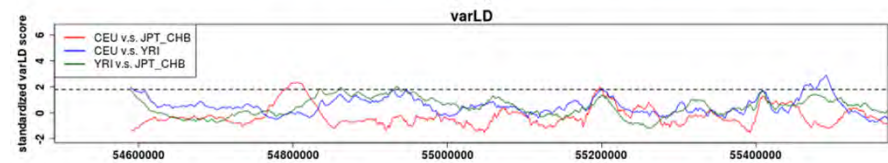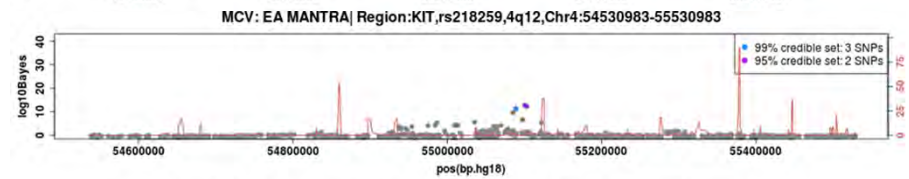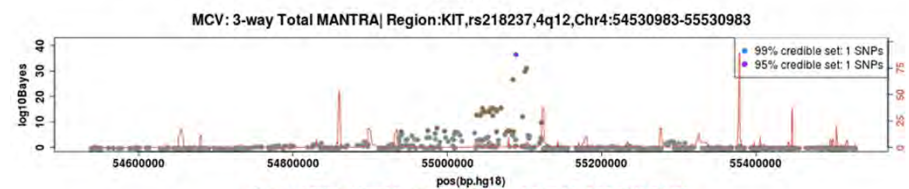

Top total SNP rs218237 Hapmap MAF: Asian=0.3258, AA=0.2712, EU=0.1102

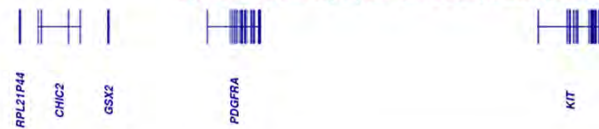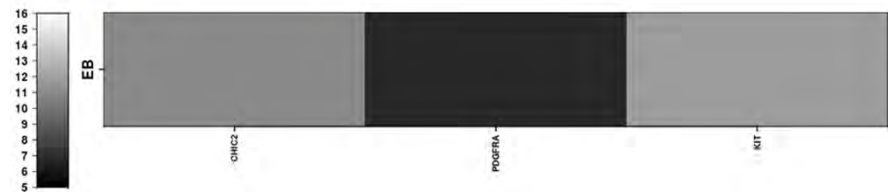

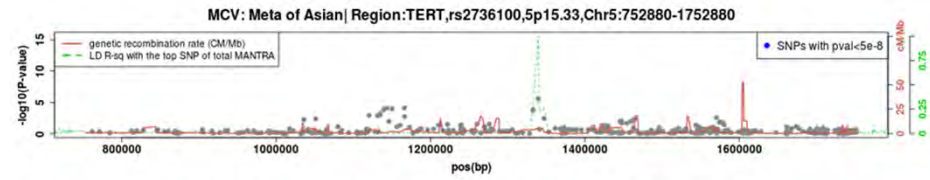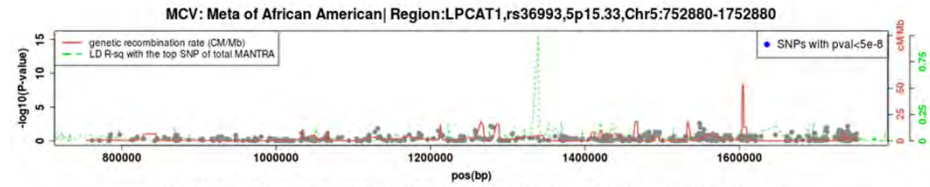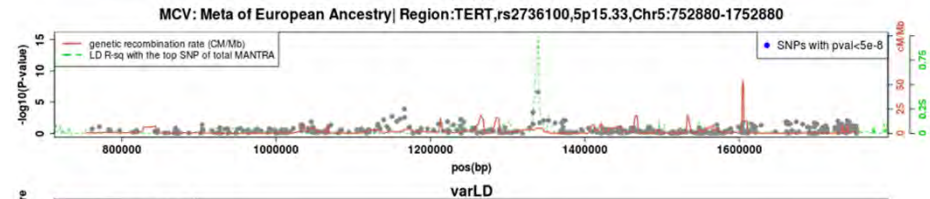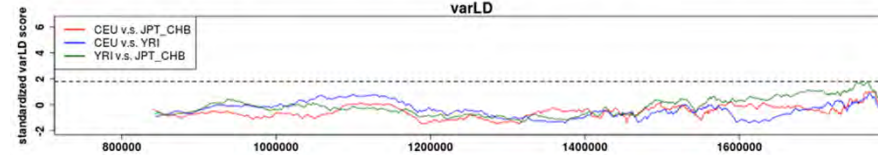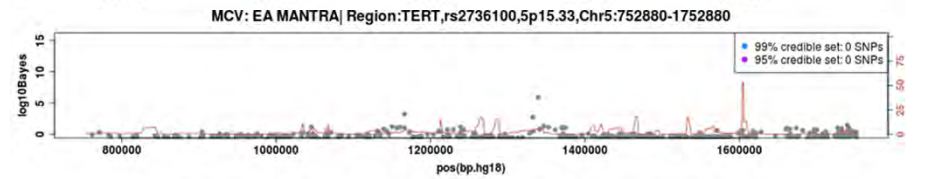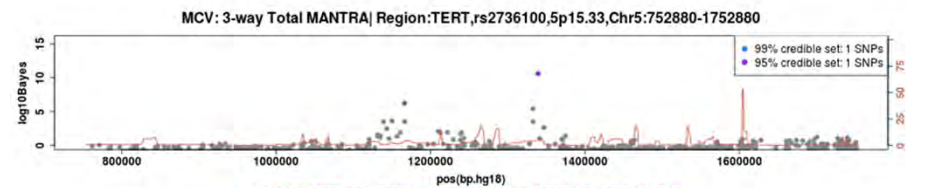

Top total SNP rs2736100 Hapmap MAF: Asian=0.3889, AA=0.425, EU=0.45

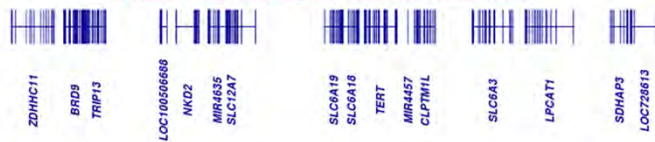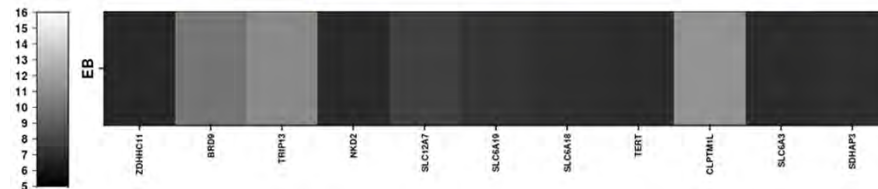



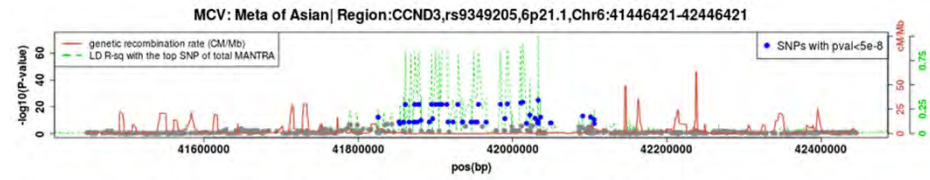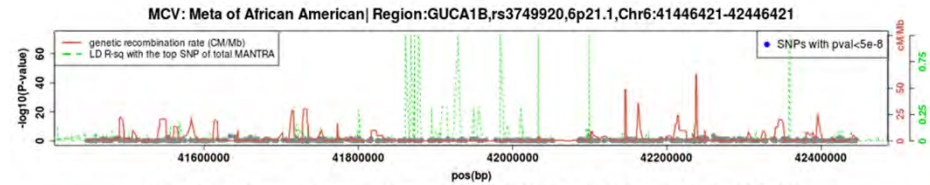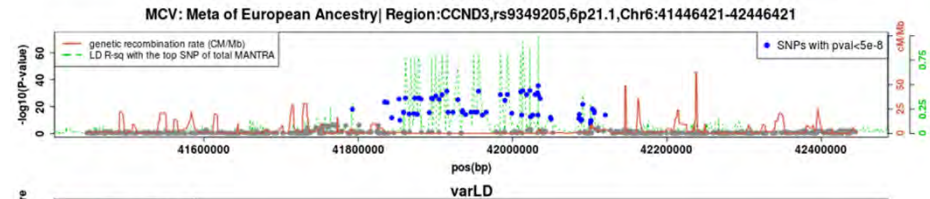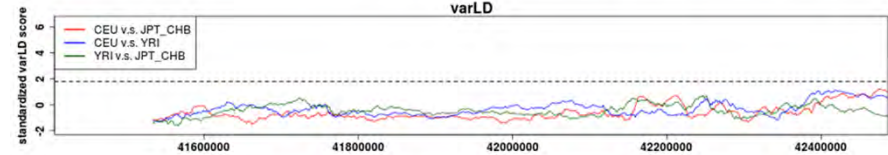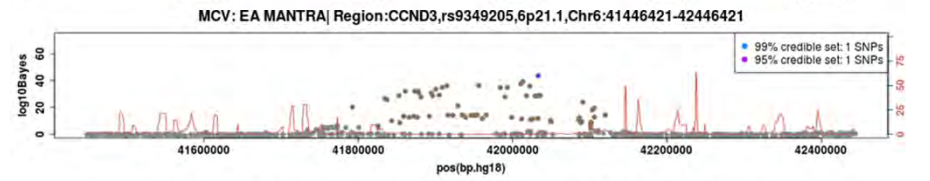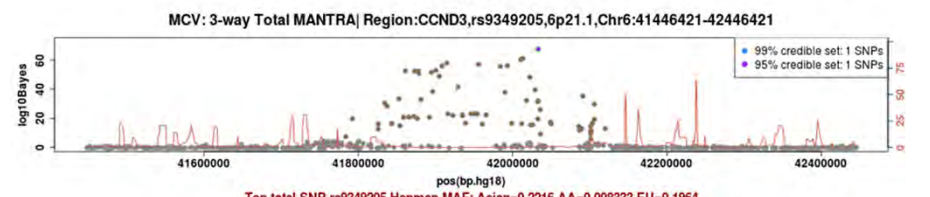

Top total SNP rs9349205 Hapmap MAF: Asian=0.2216, AA=0.008333, EU=0.1964

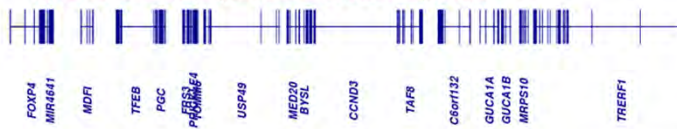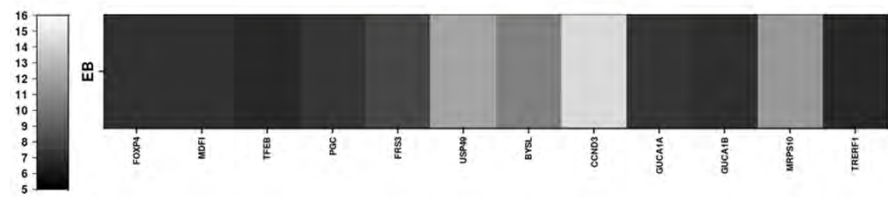



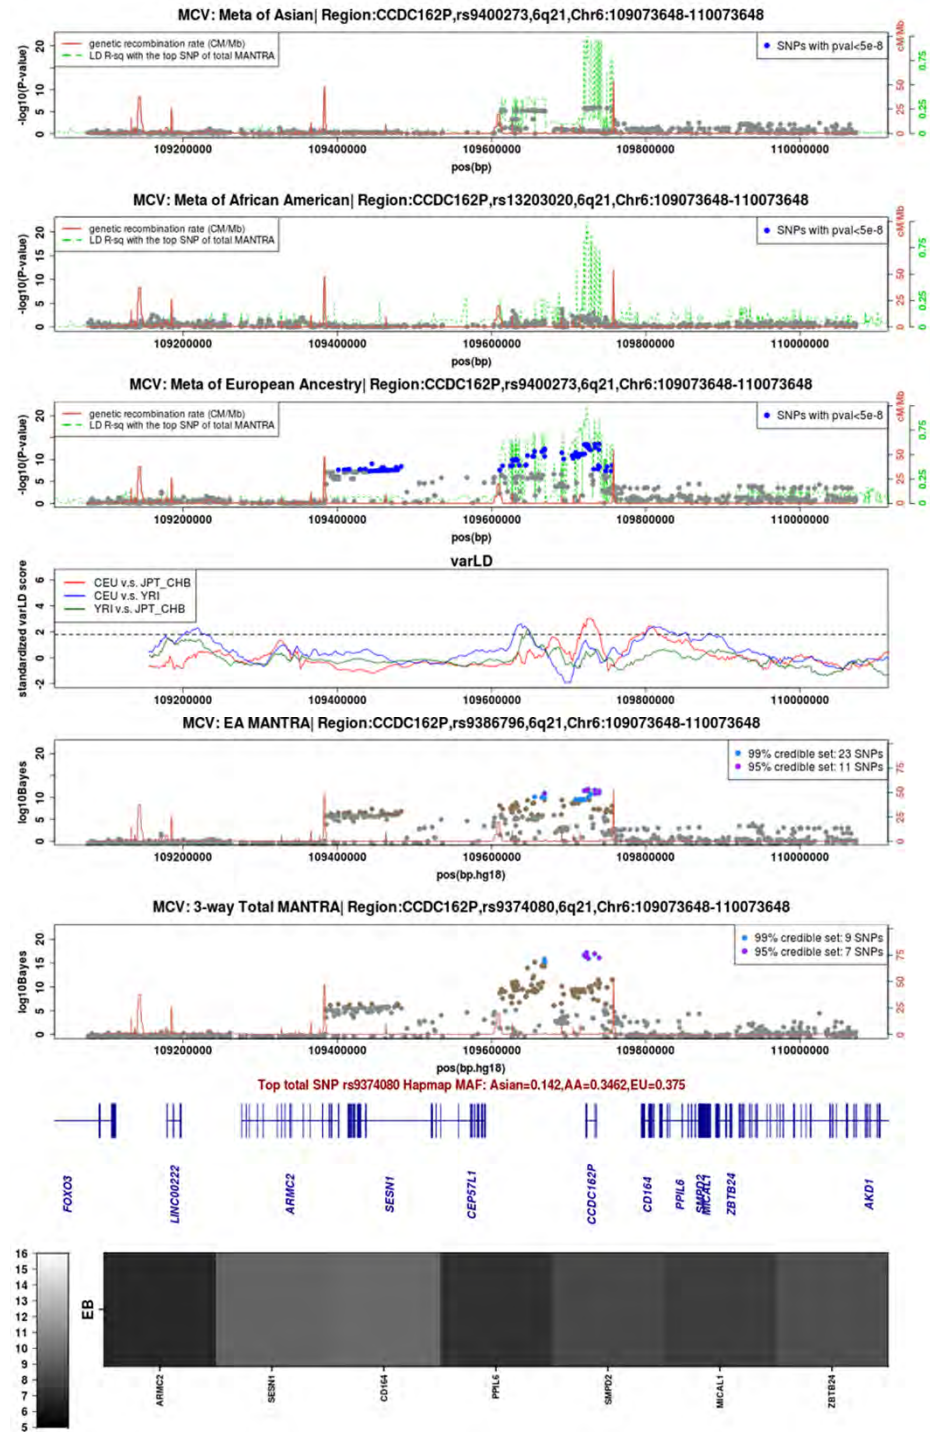

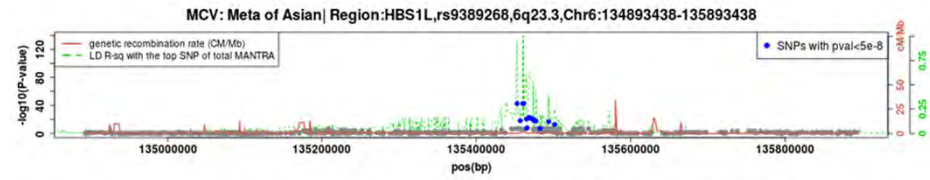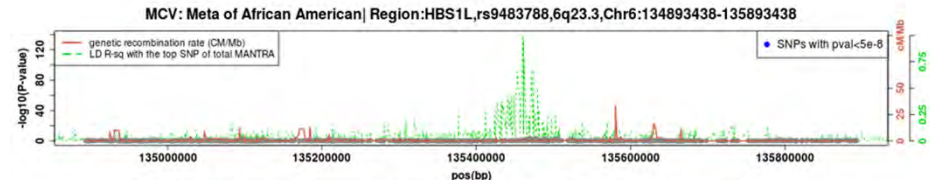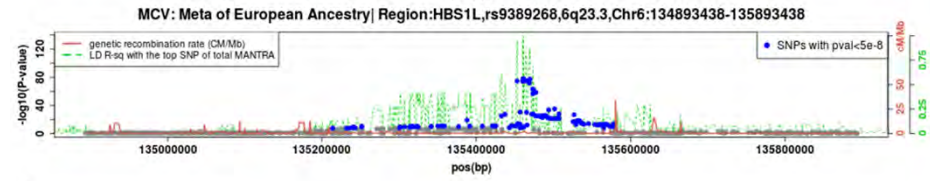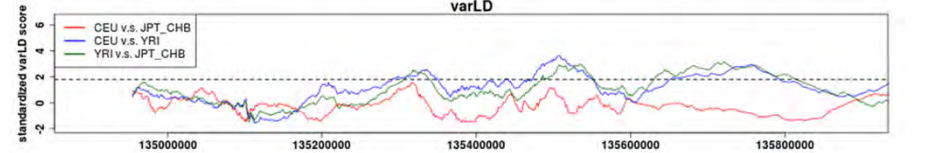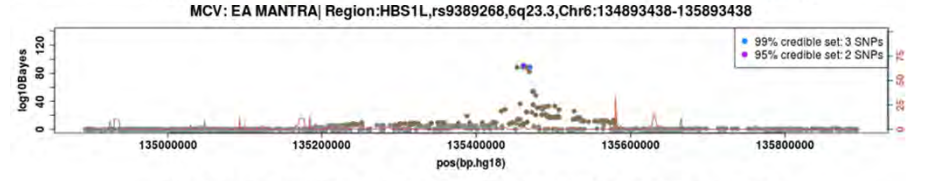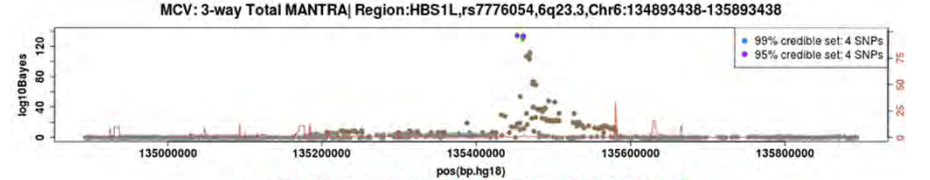

Top total SNP rs7776054 Hapmap MAF: Asian=0.3222,AA=0.2417,EU=0.2203

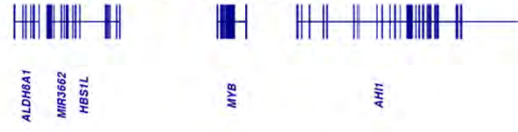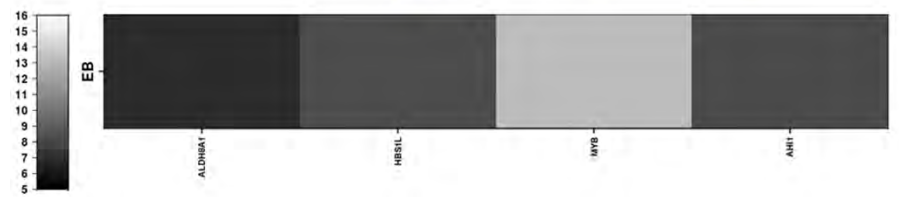

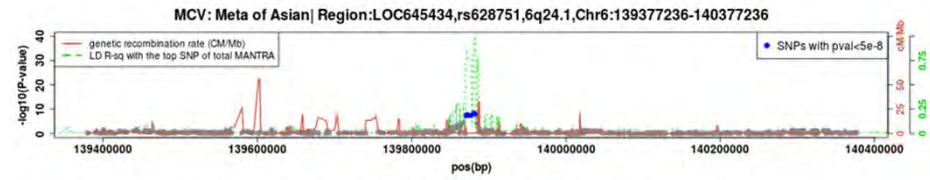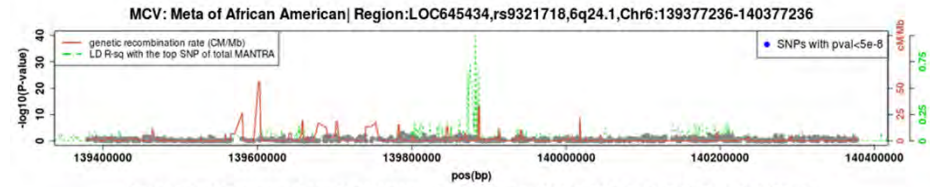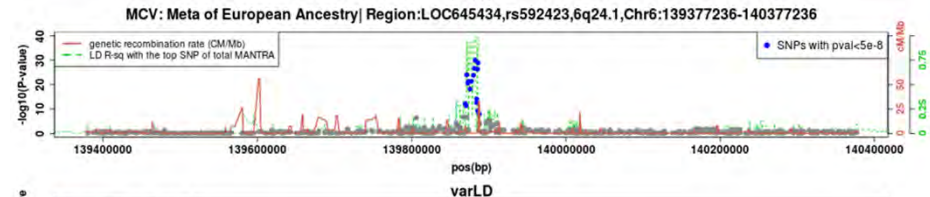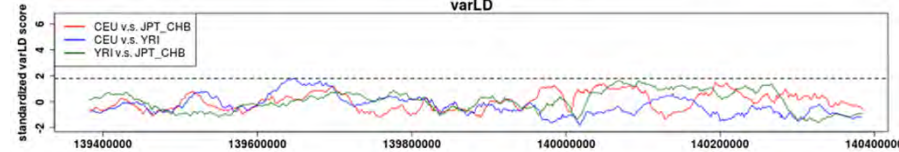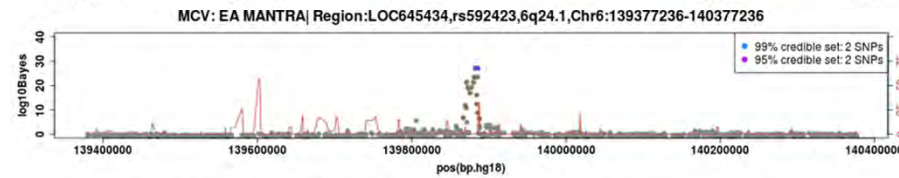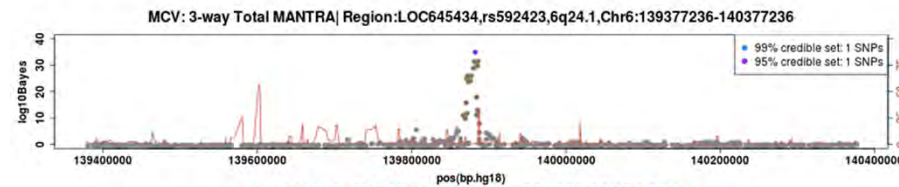

Top total SNP rs592423 Hapmap MAF: Asian=0.2722, AA=0.475, EU=0.4583

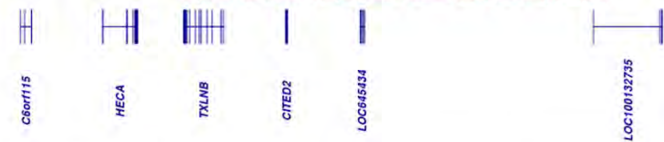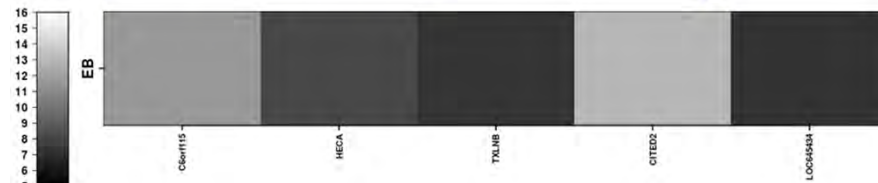

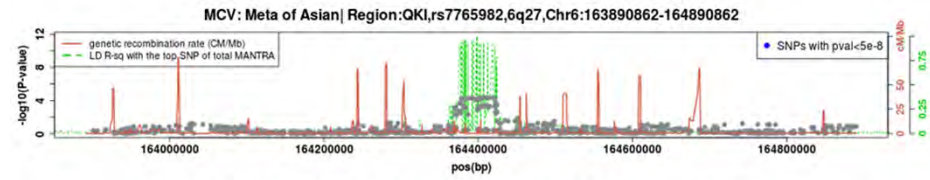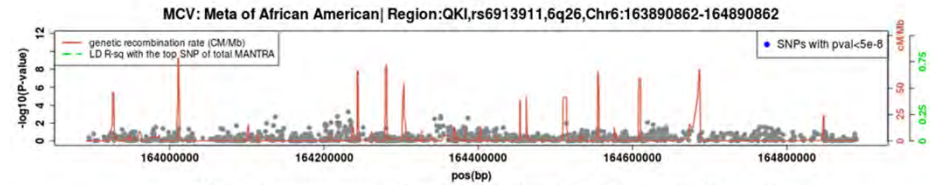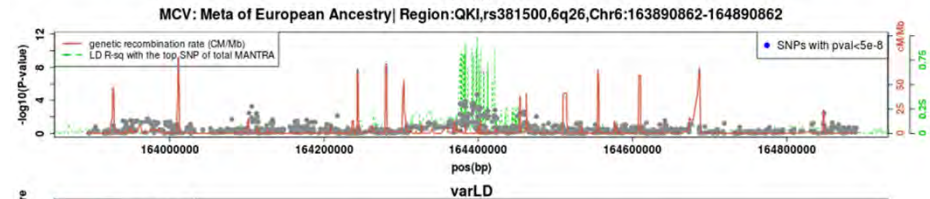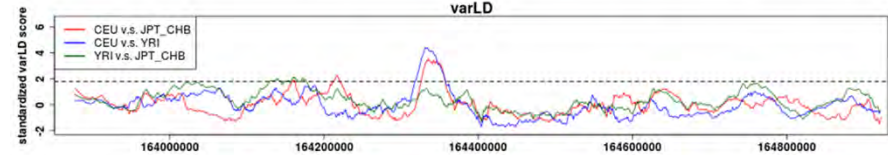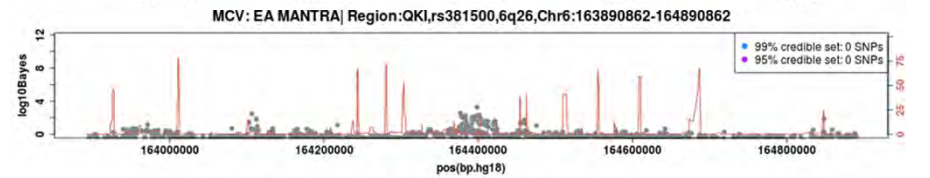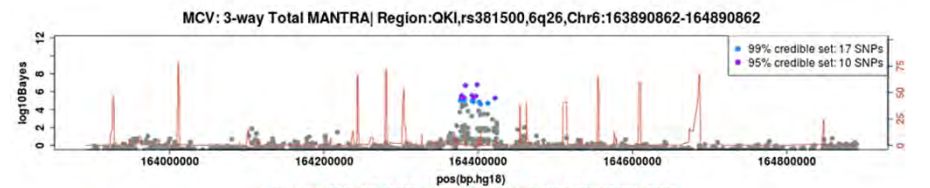

Top total SNP rs381500 Hapmap MAF: Asian=0.4333,AA=NA,EU=0.425

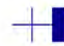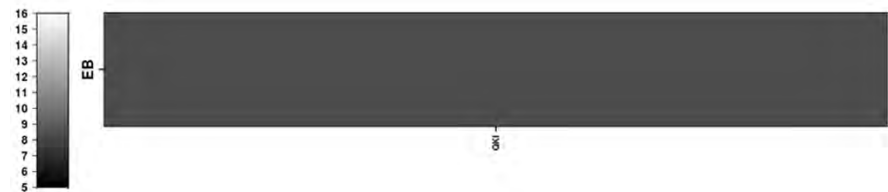

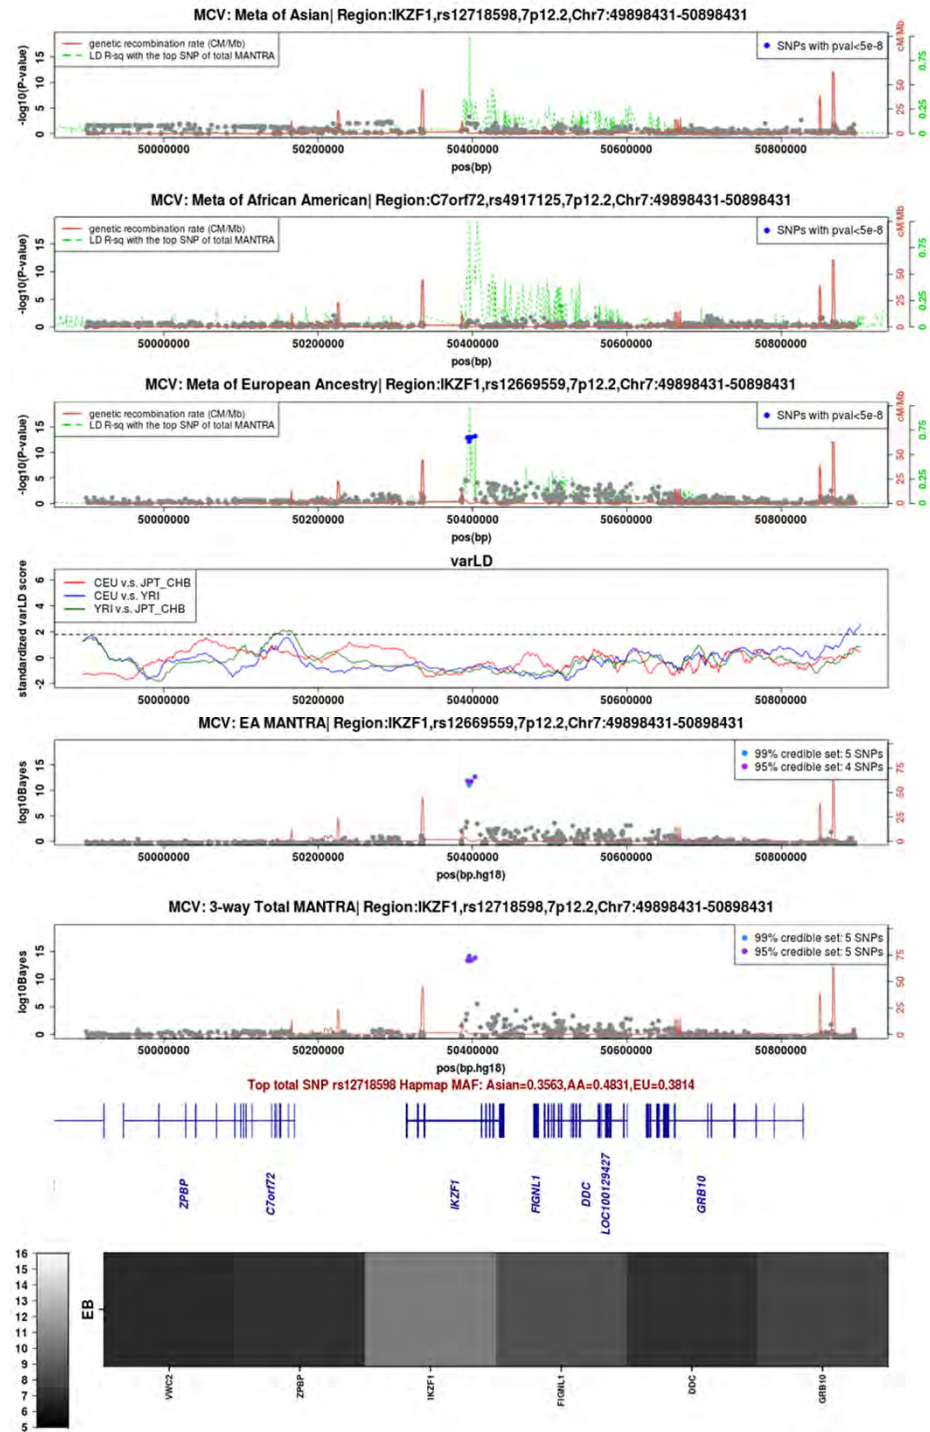

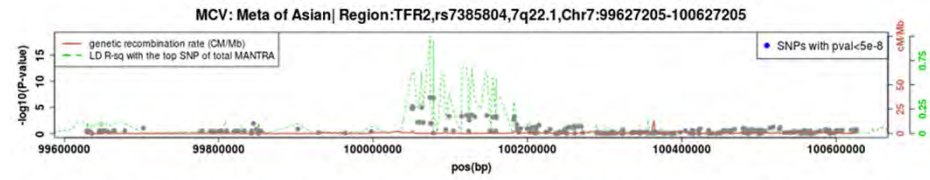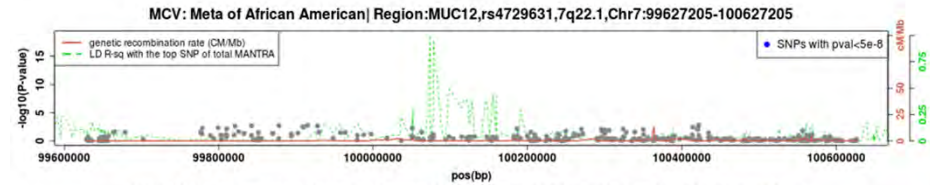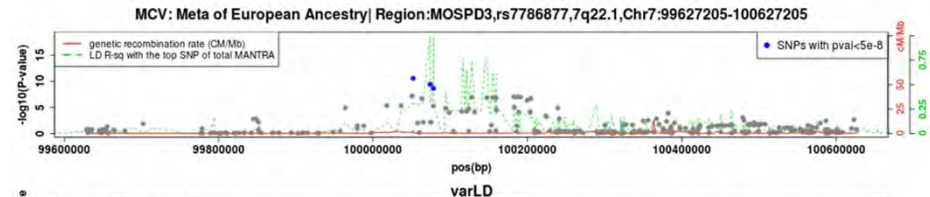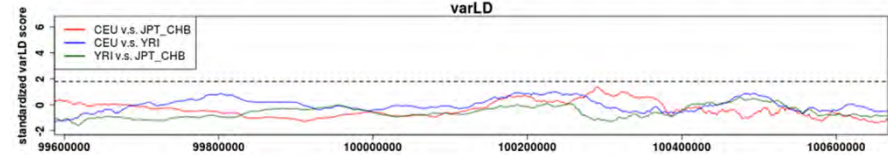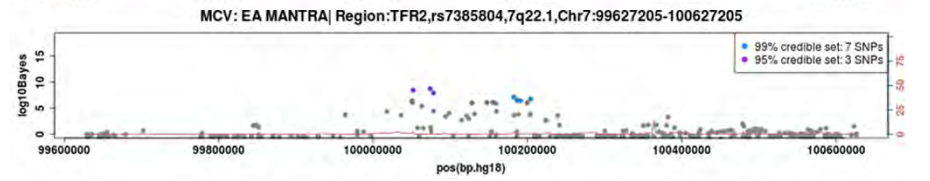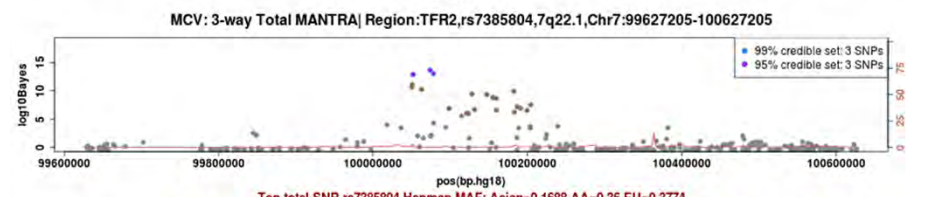

Top total SNP rs7385804 Hapmap MAF: Asian=0.1688, AA=0.36, EU=0.3774

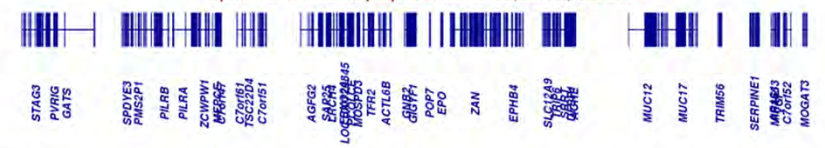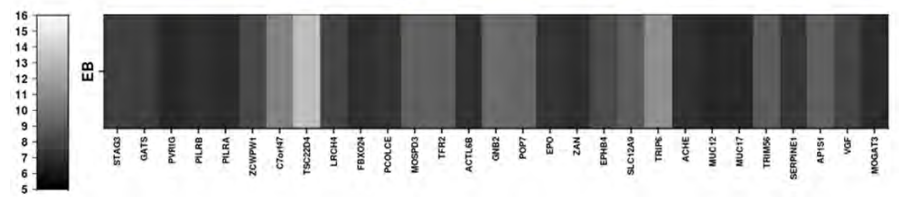

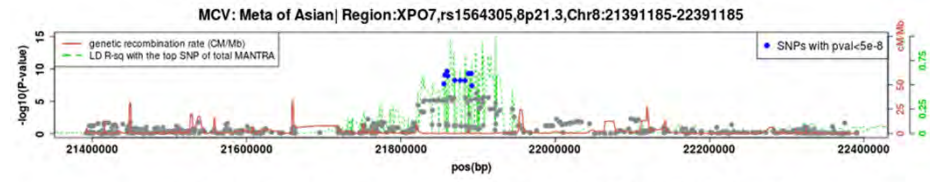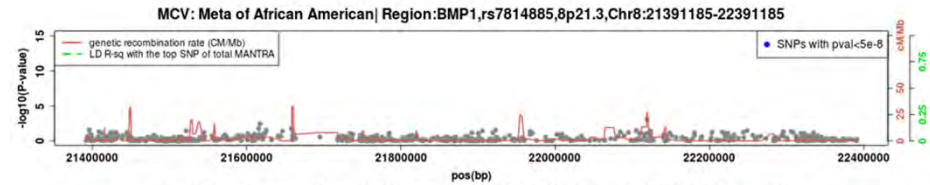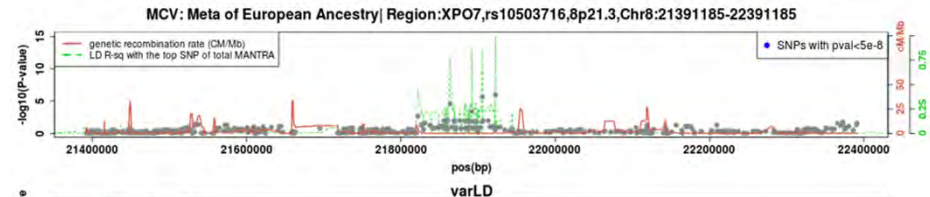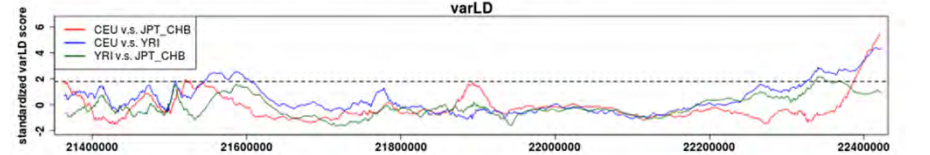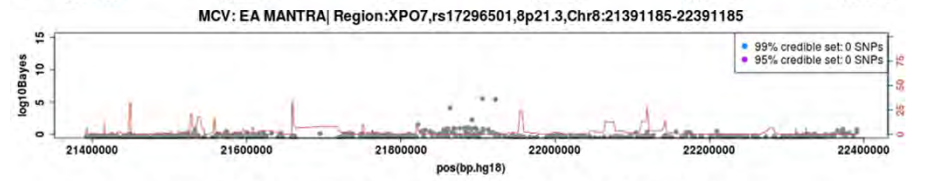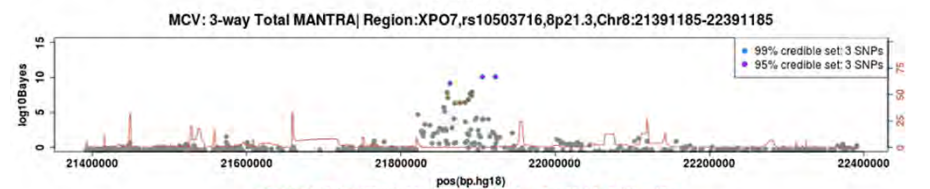

Top total SNP rs10503716 Hapmap MAF: Asian=0.3333,AA=0,EU=0.1667

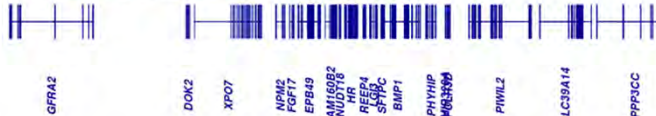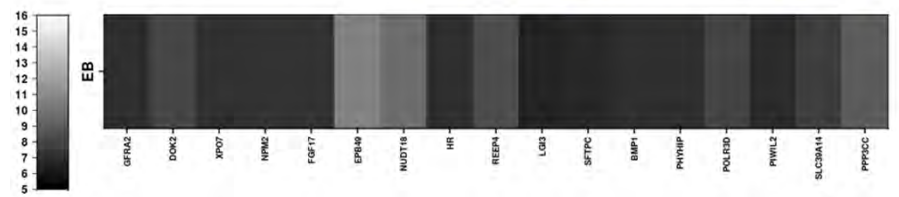

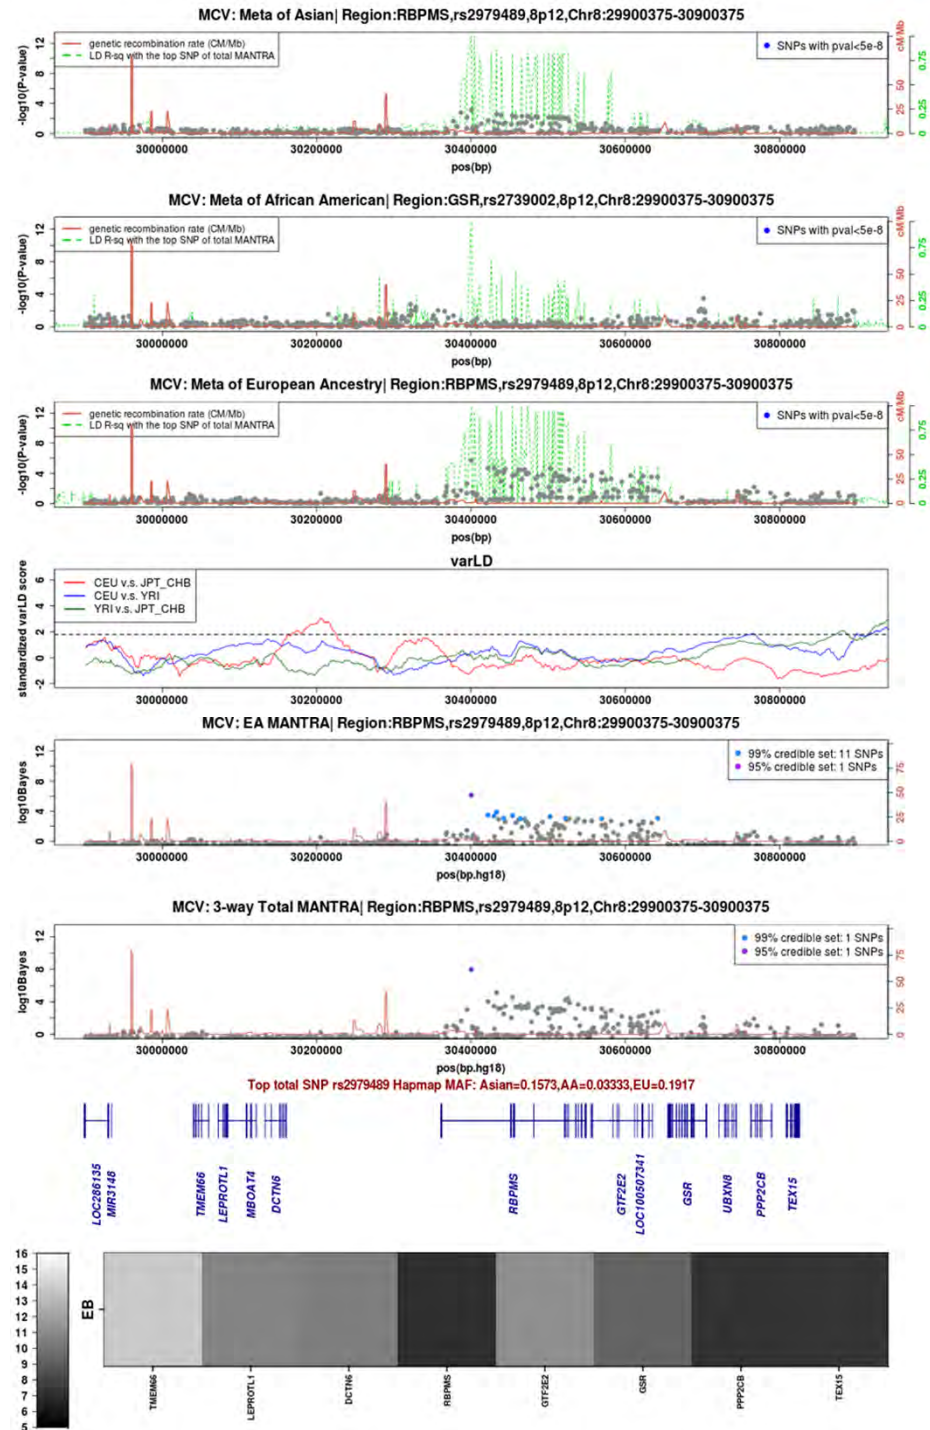



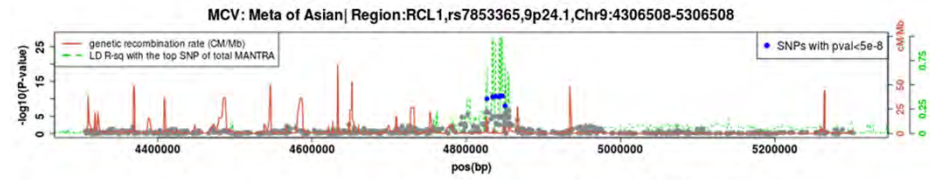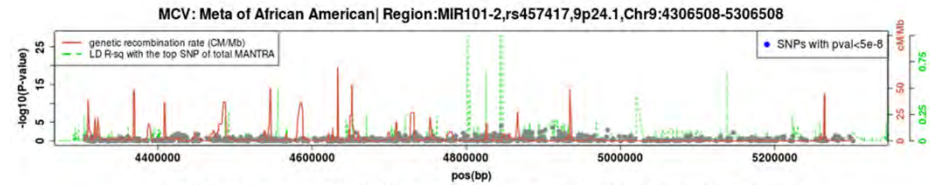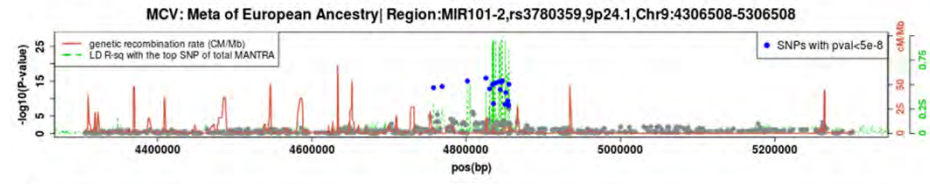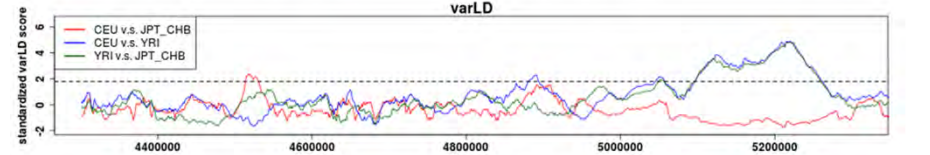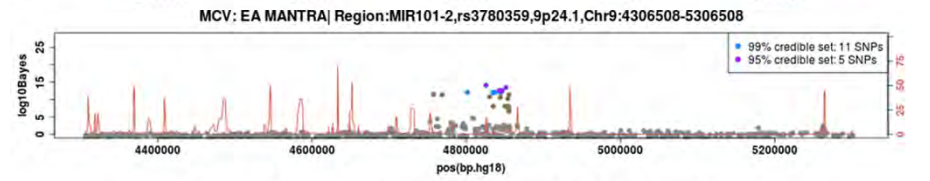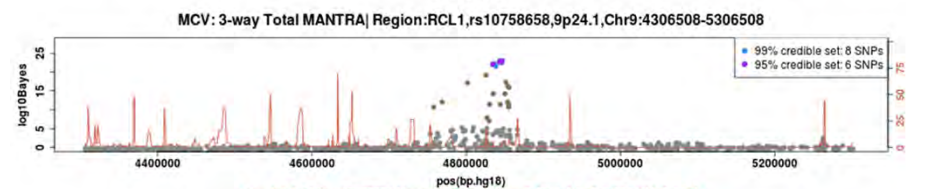

Top total SNP rs10758658 Hapmap MAF: Asian=0.4889, AA=0.01667, EU=0.1864

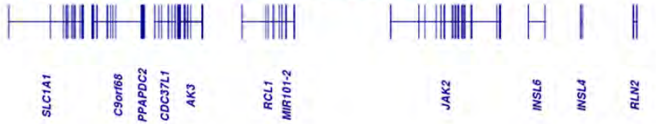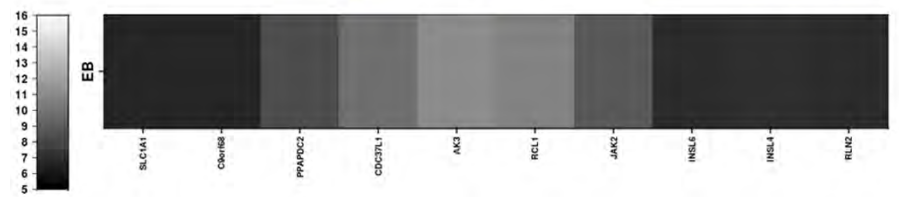

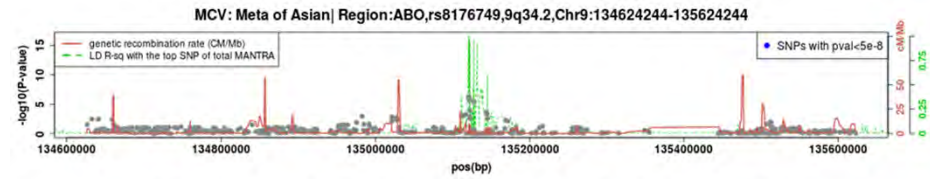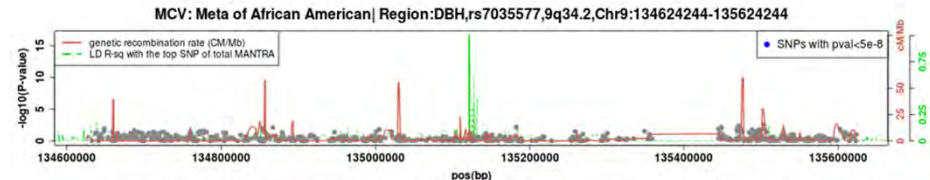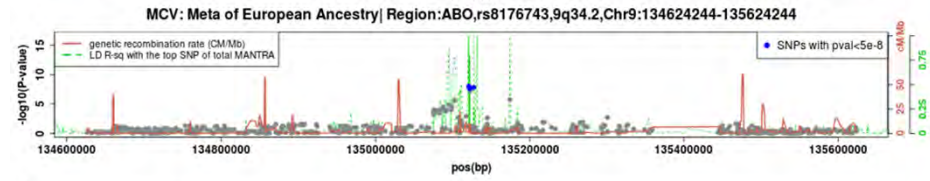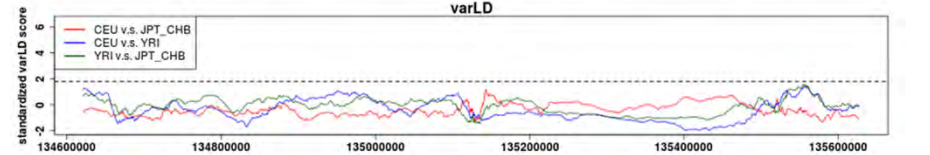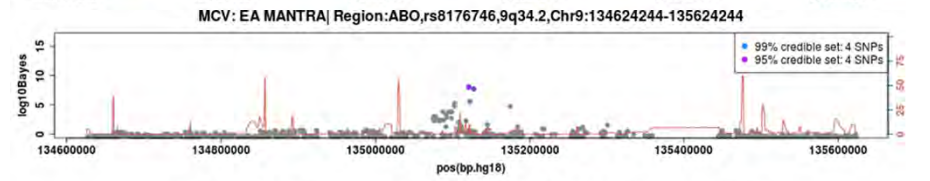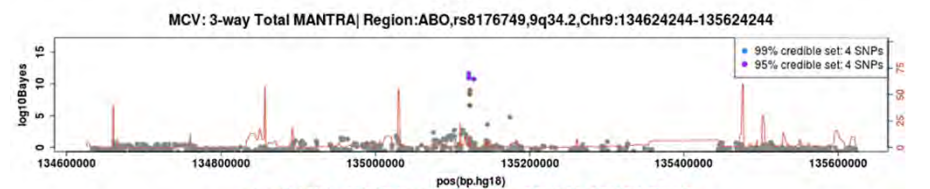

Top total SNP rs8176749 Hapmap MAF: Asian=0.2079, AA=0.275, EU=0.08333

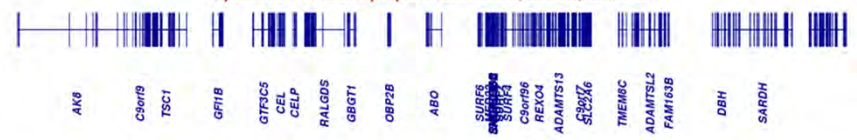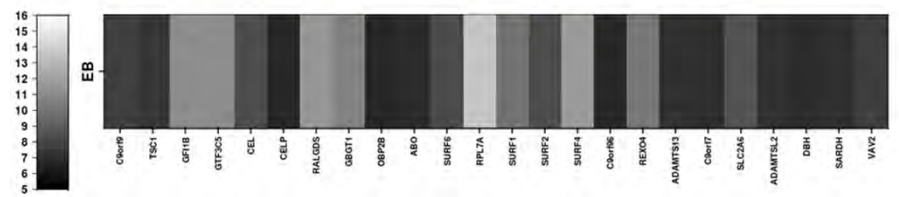

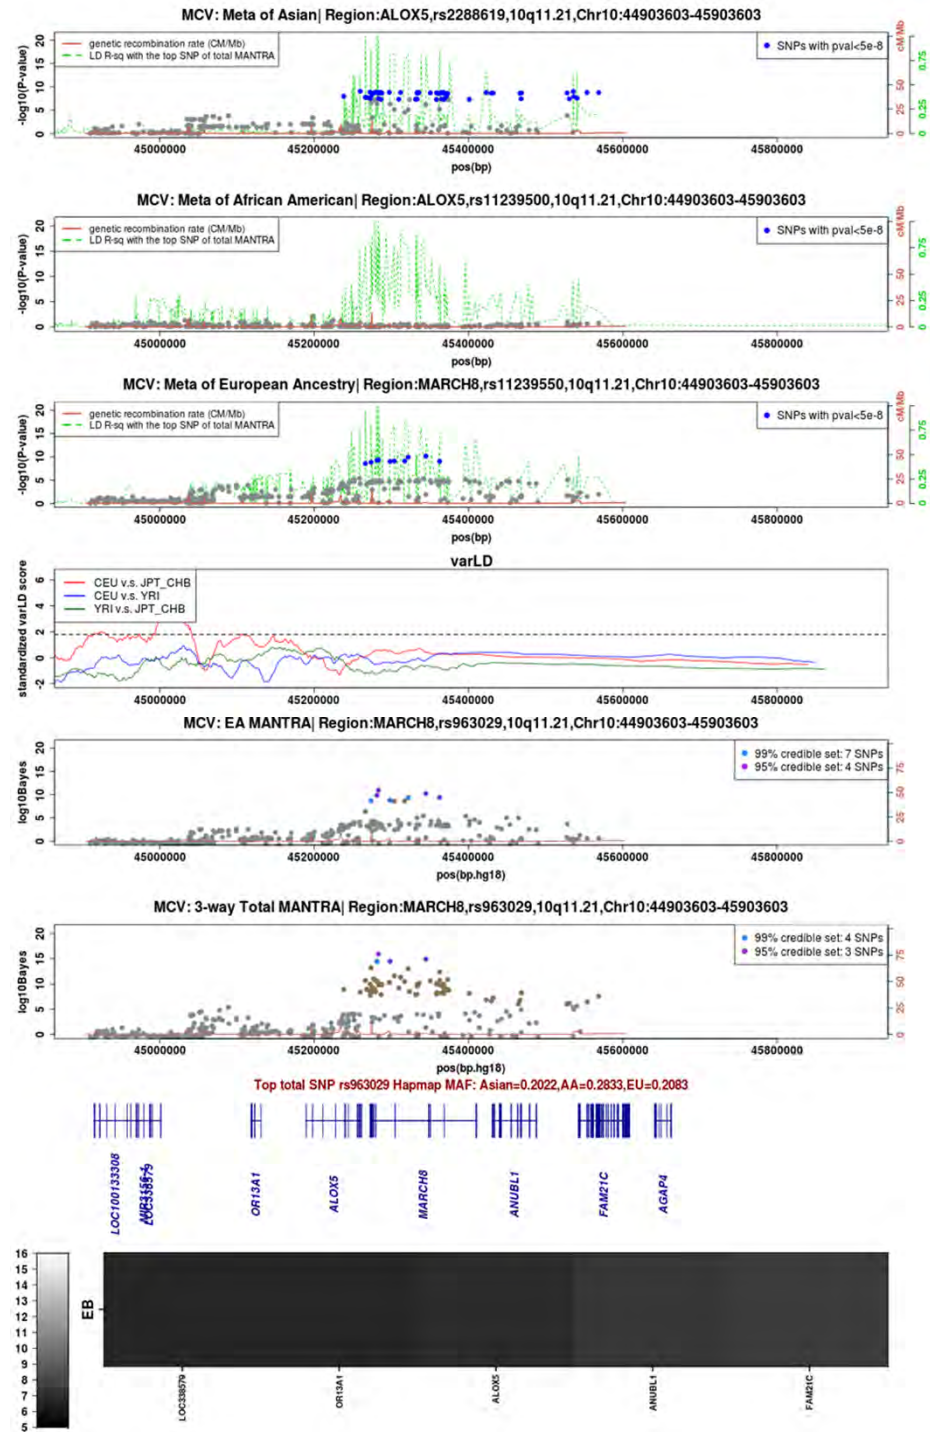

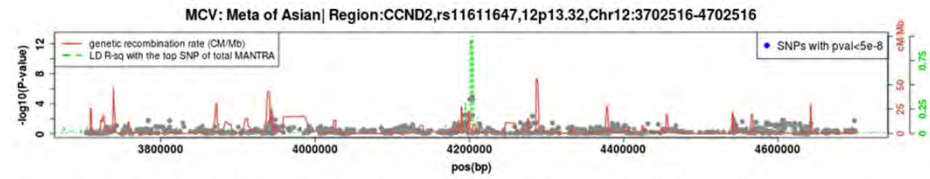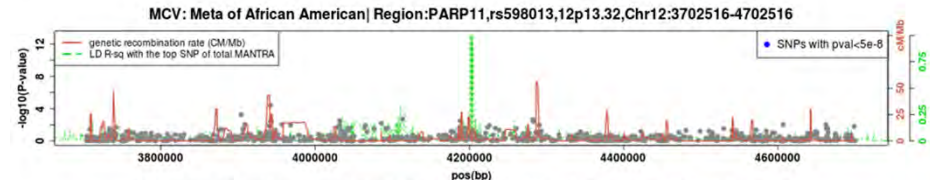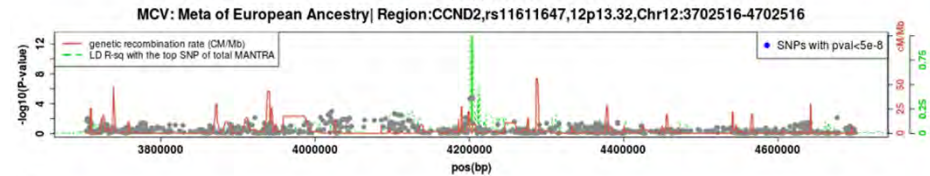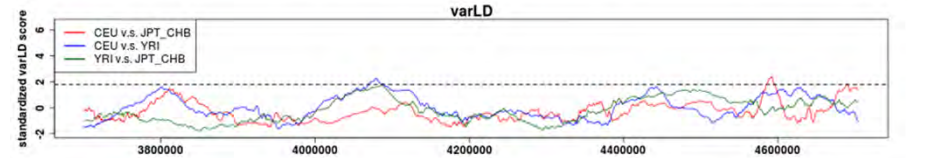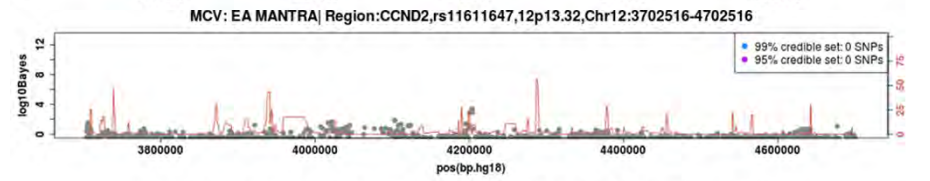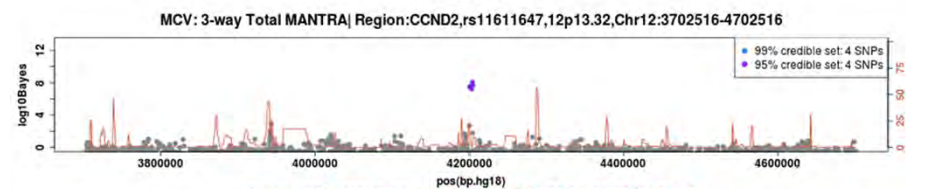

Top total SNP rs11611647 Hapmap MAF: Asian=0.2556,AA=0.2719,EU=0.2583

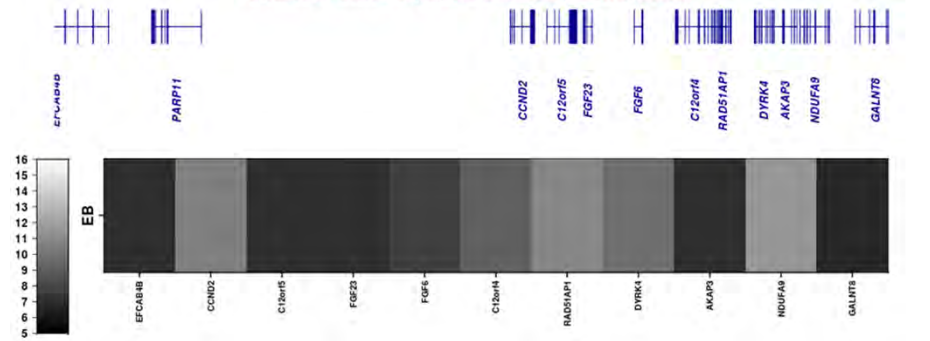

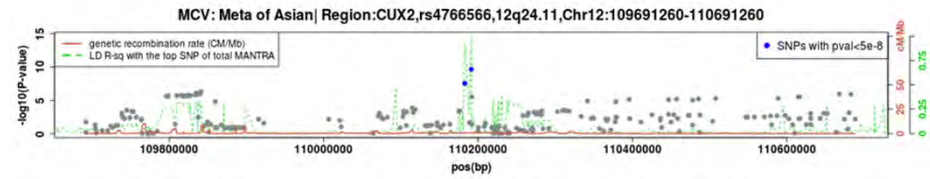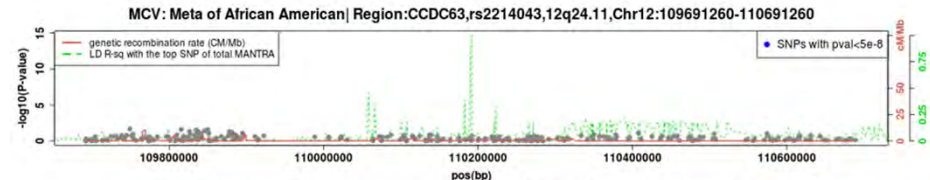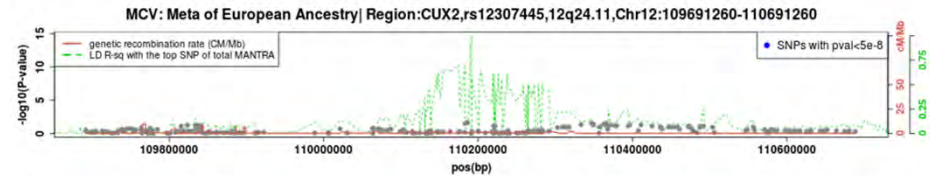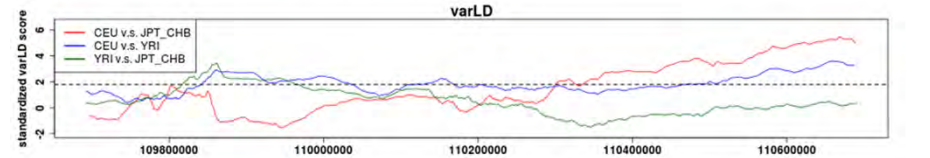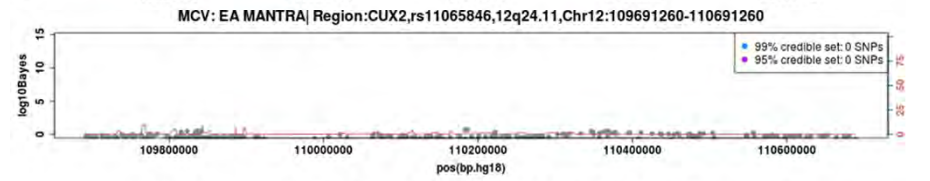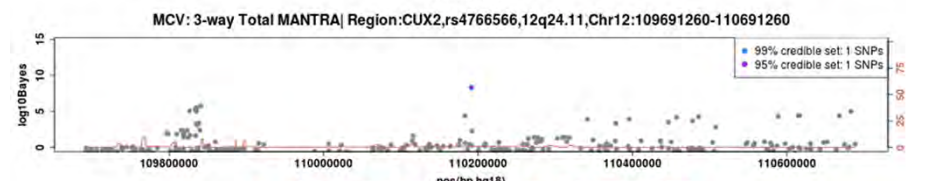

Top total SNP rs4766566 Hapmap MAF: Asian=0.3038, AA=0.1604, EU=0.2596

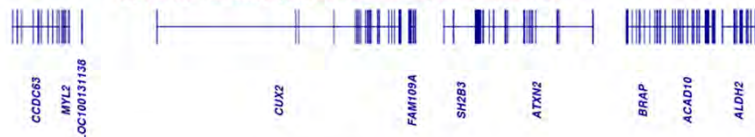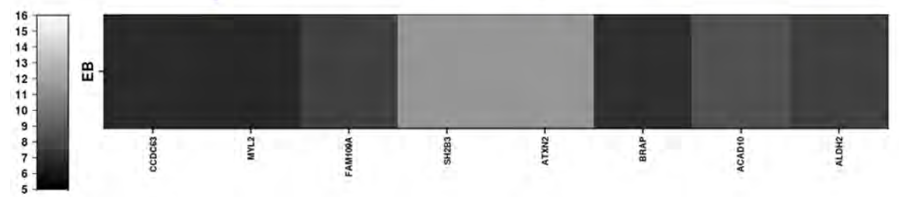

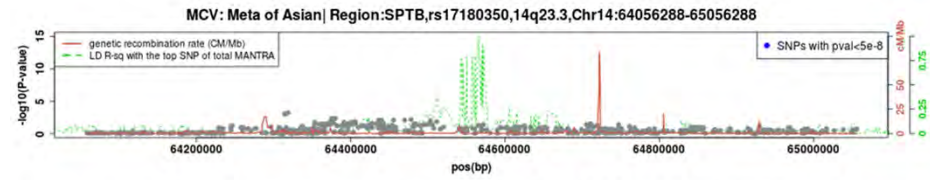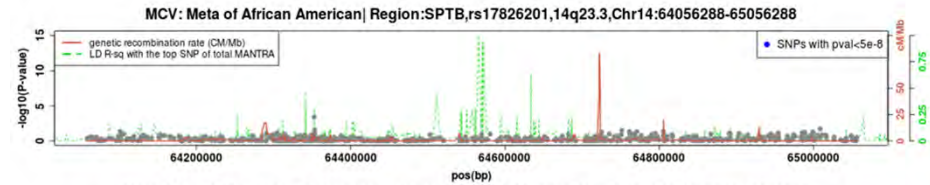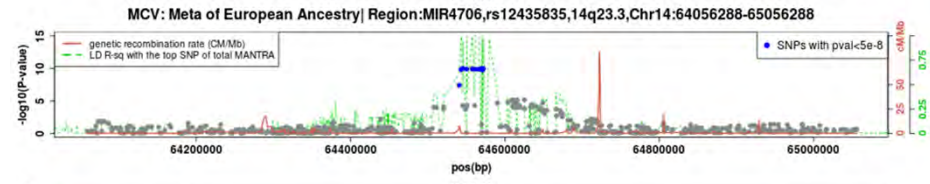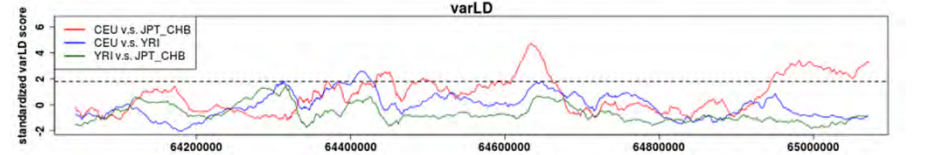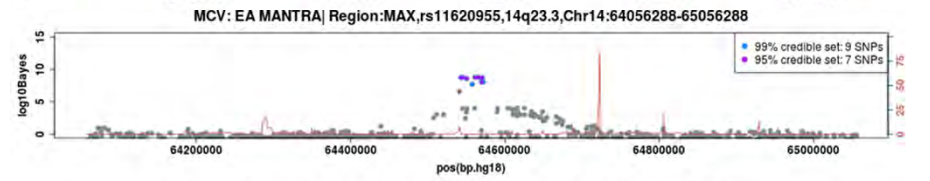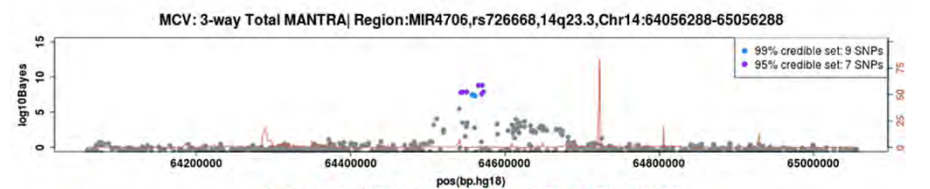

Top total SNP rs726668 Hapmap MAF: Asian=0.4045,AA=0.1167,EU=0.5

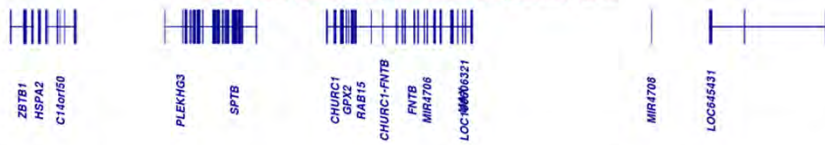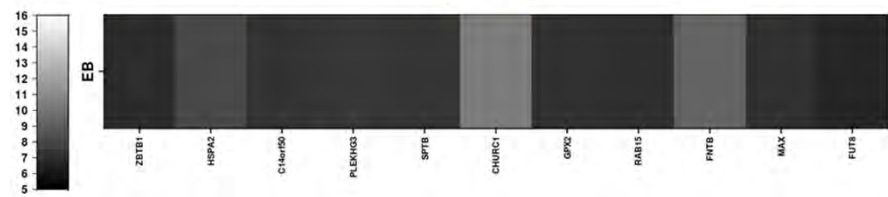

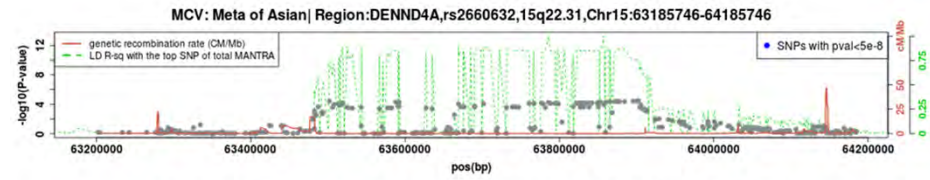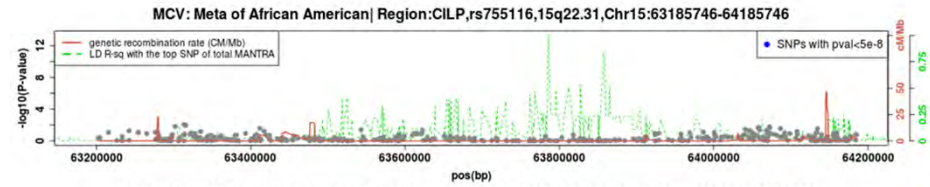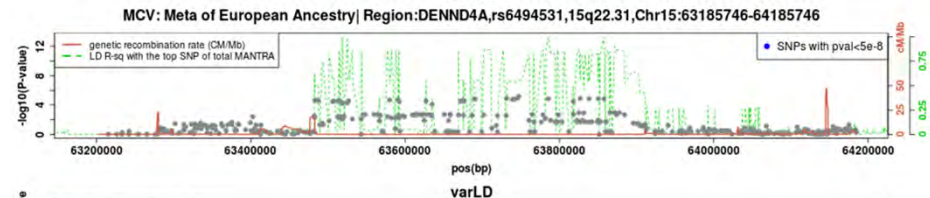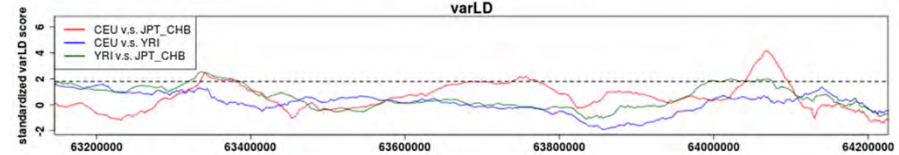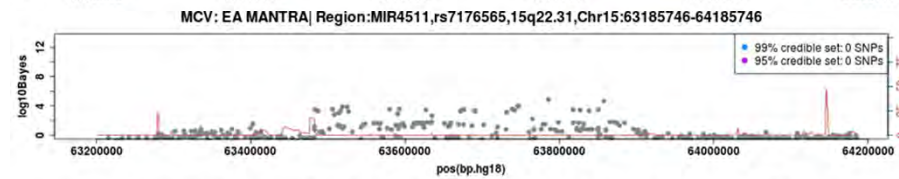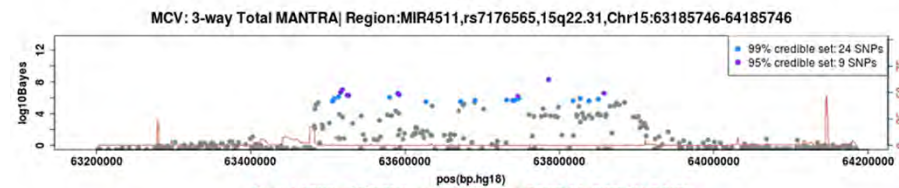

Top total SNP rs7176565 Hapmap MAF: Asian=0.2722, AA=0.475, EU=0.2167

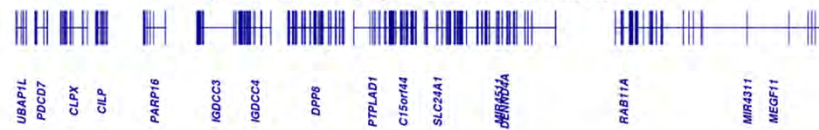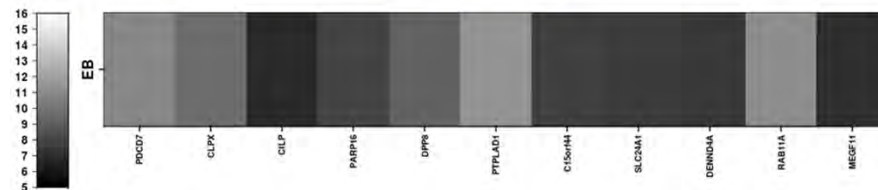





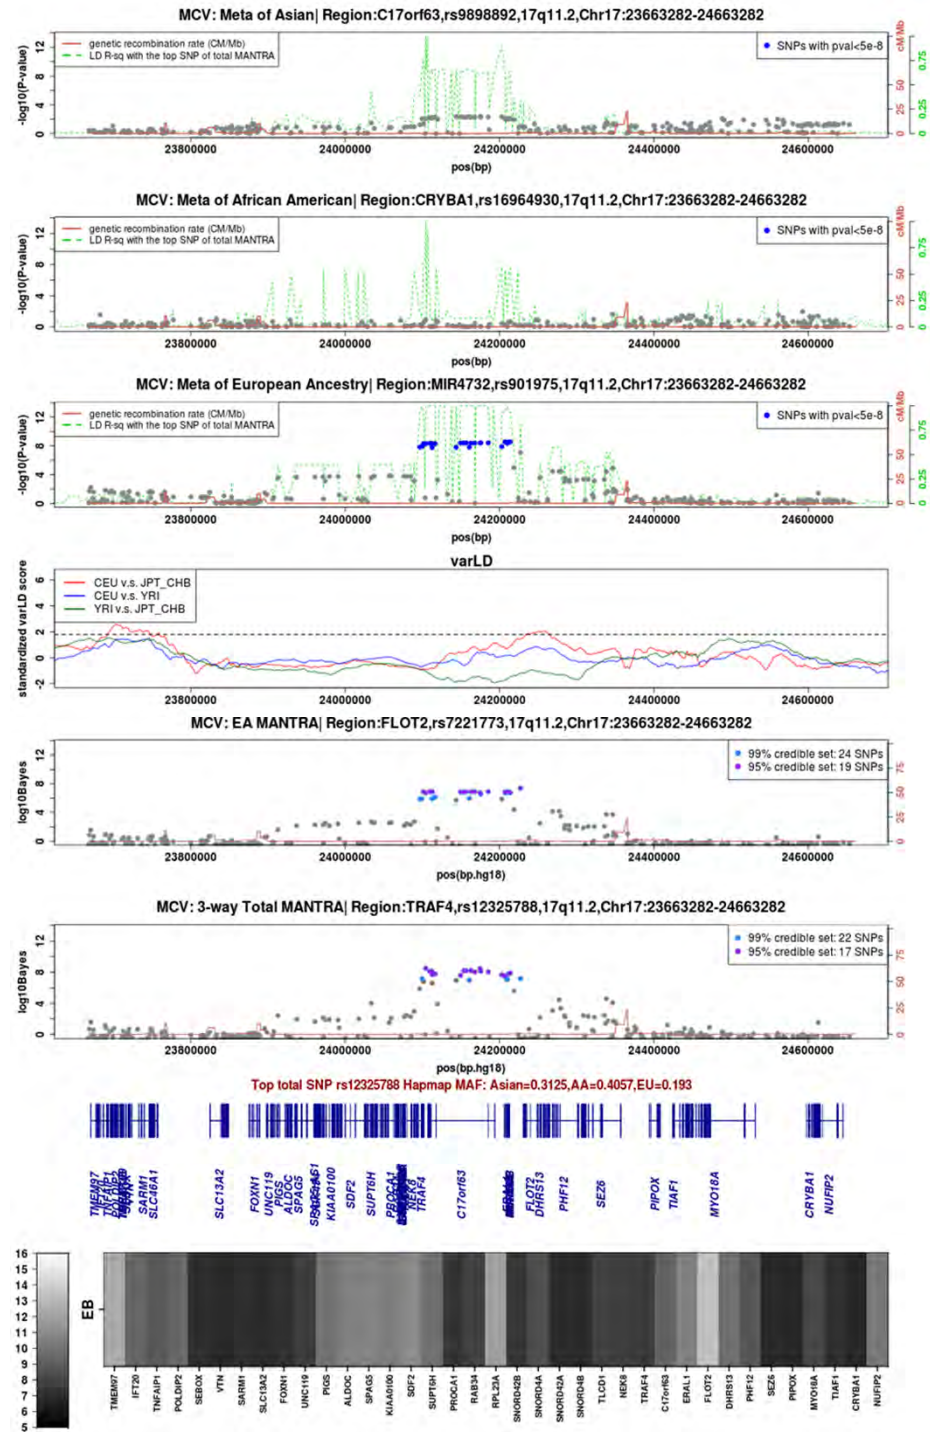

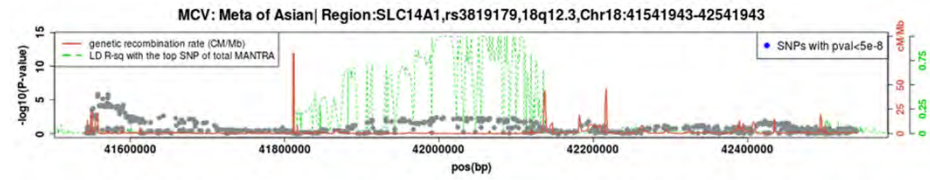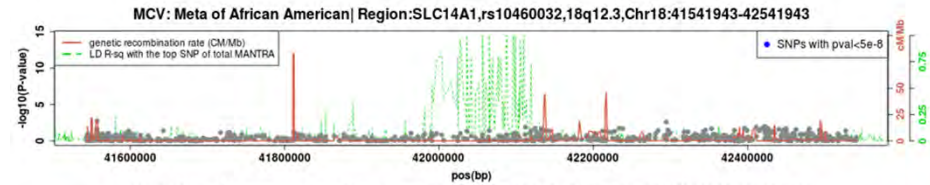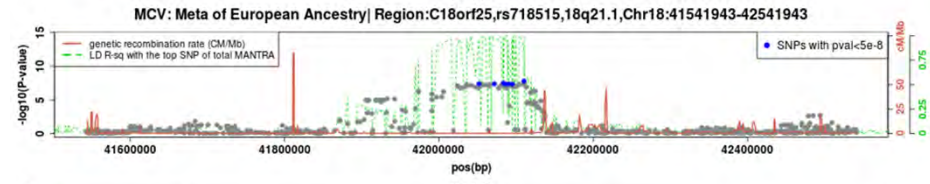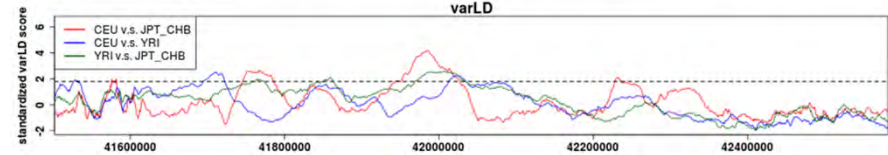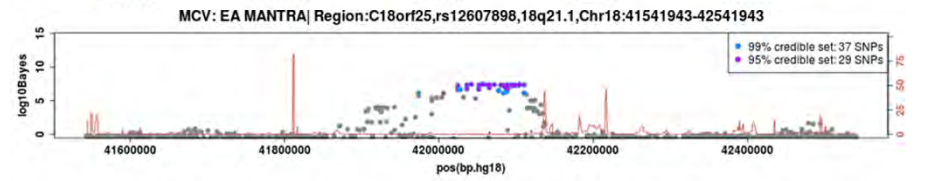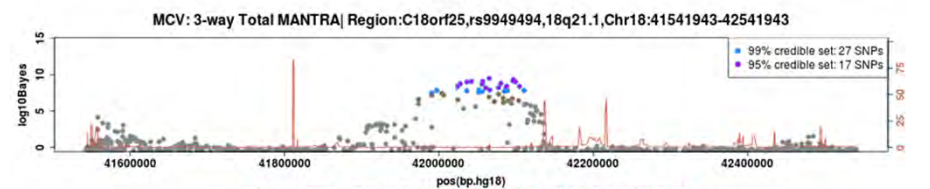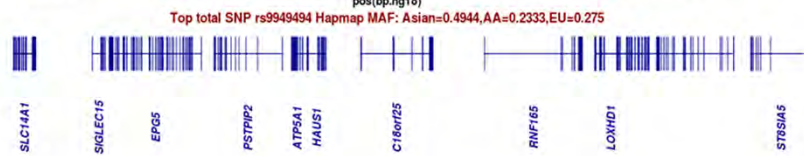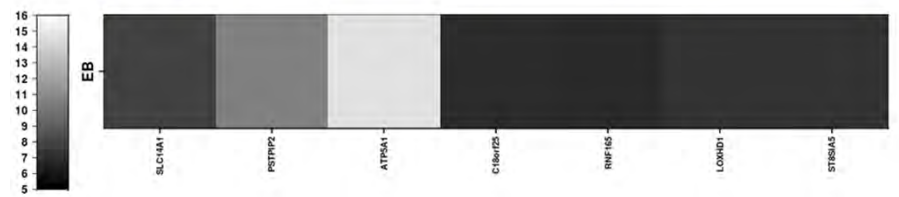

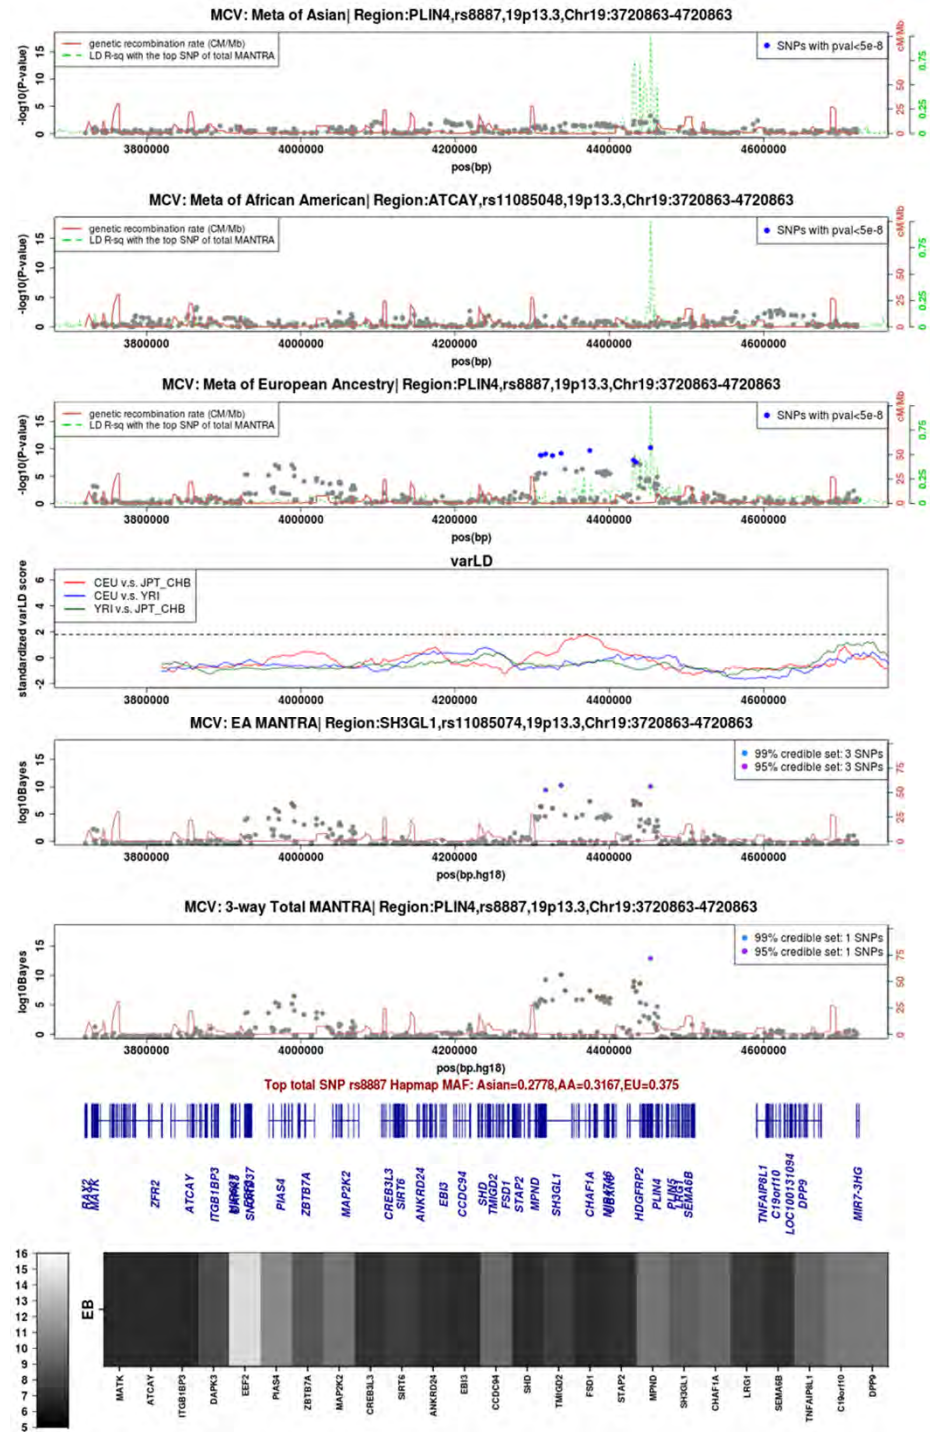



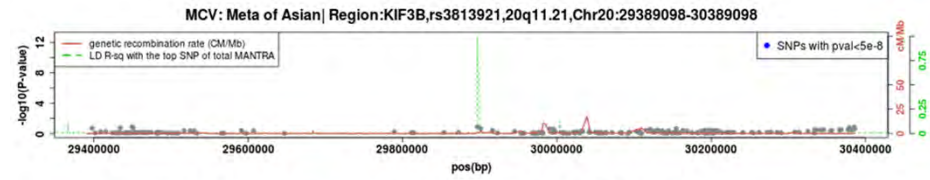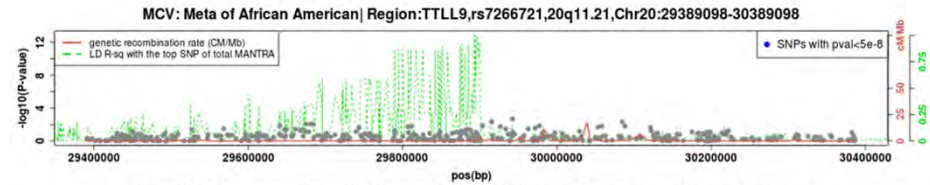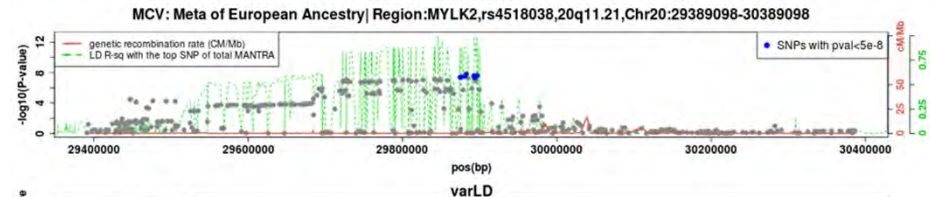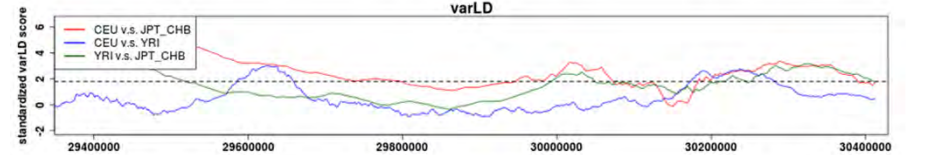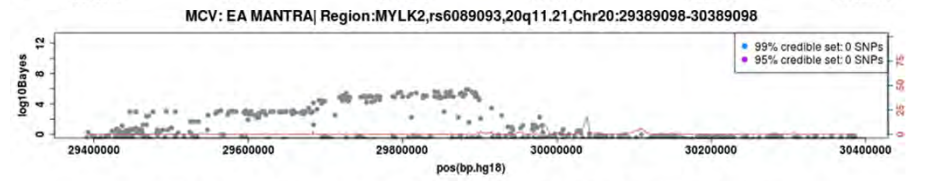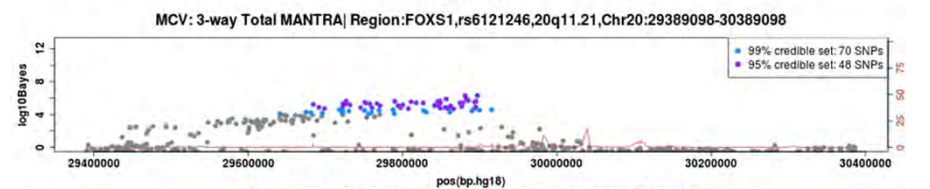

Top total SNP rs6121246 Hapmap MAF: Asian=0.00641,AA=0.4746,EU=0.2708

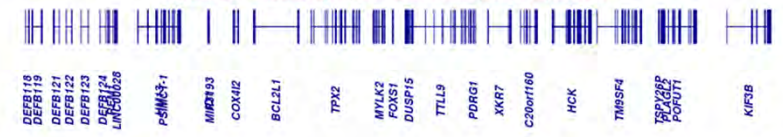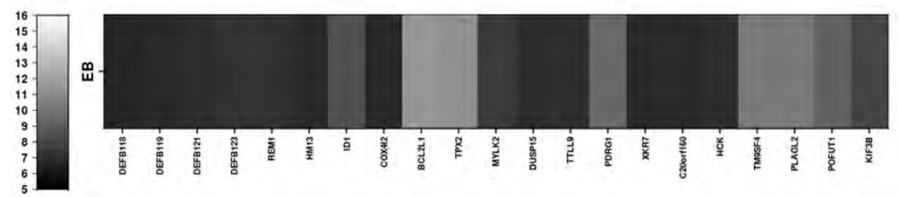

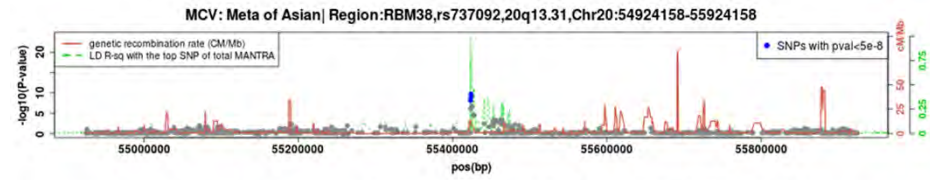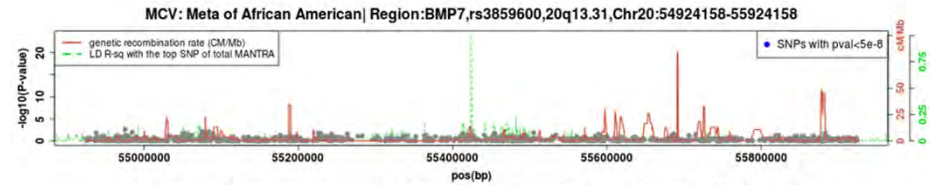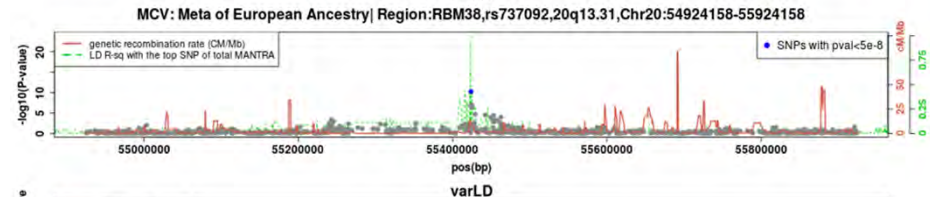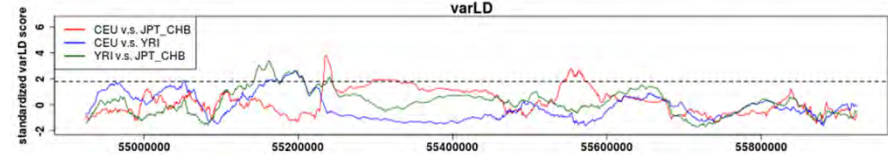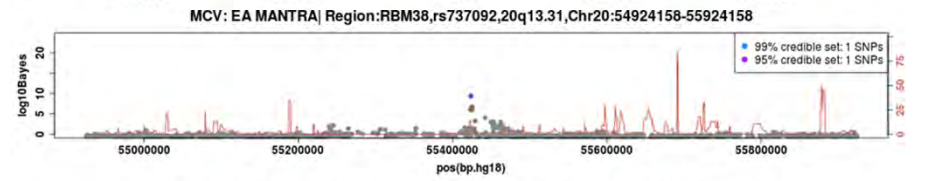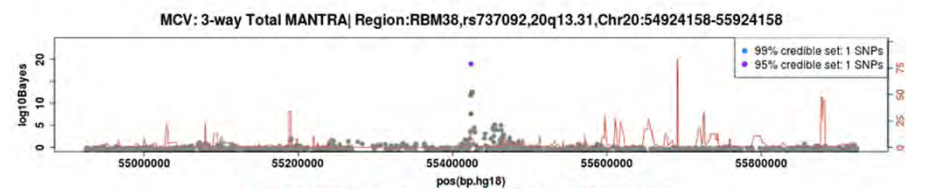

Top total SNP rs737092 Hapmap MAF: Asian=0.45,AA=0.2167,EU=0.4583

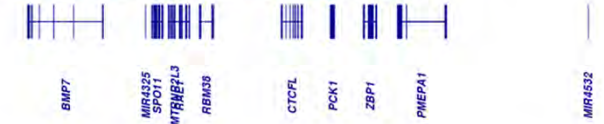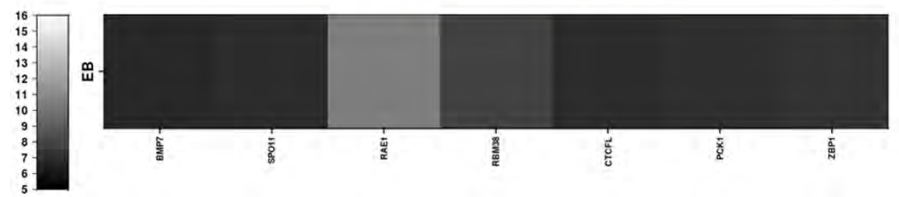

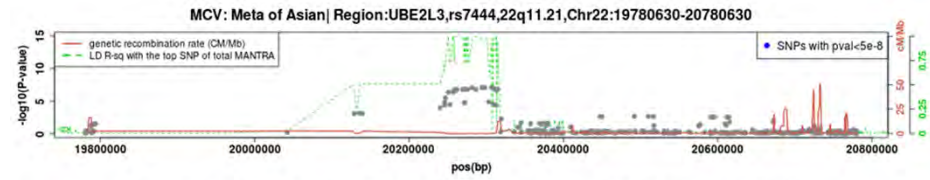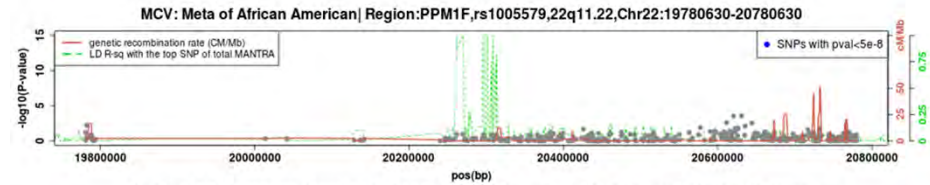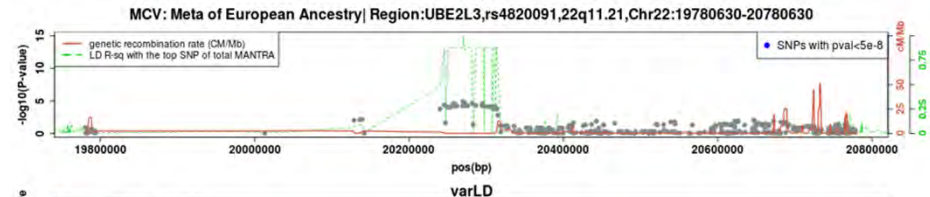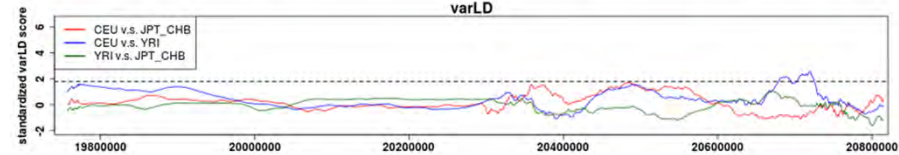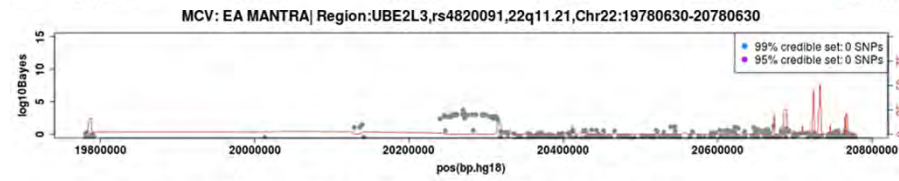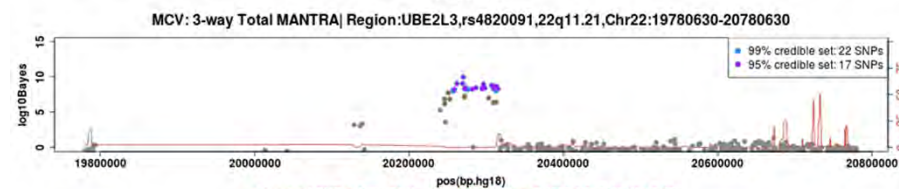

Top total SNP rs4820091 Hapmap MAF: Asian=0.4663, AA=0.45, EU=0.125

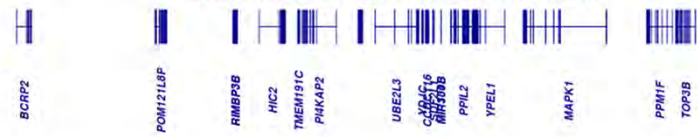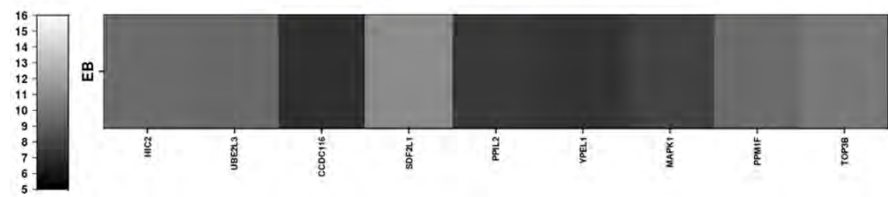

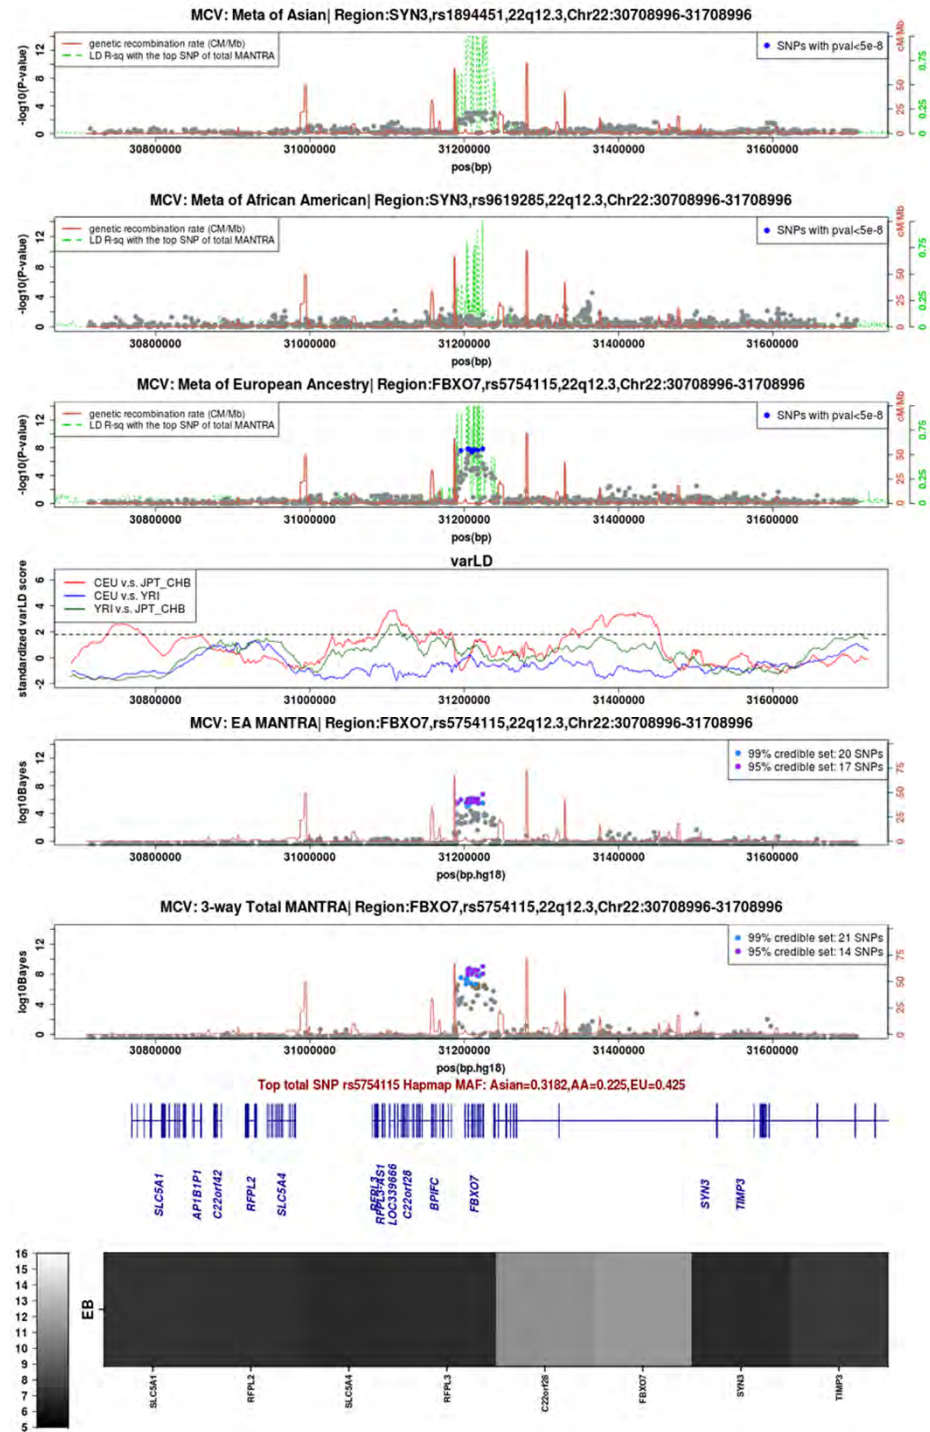



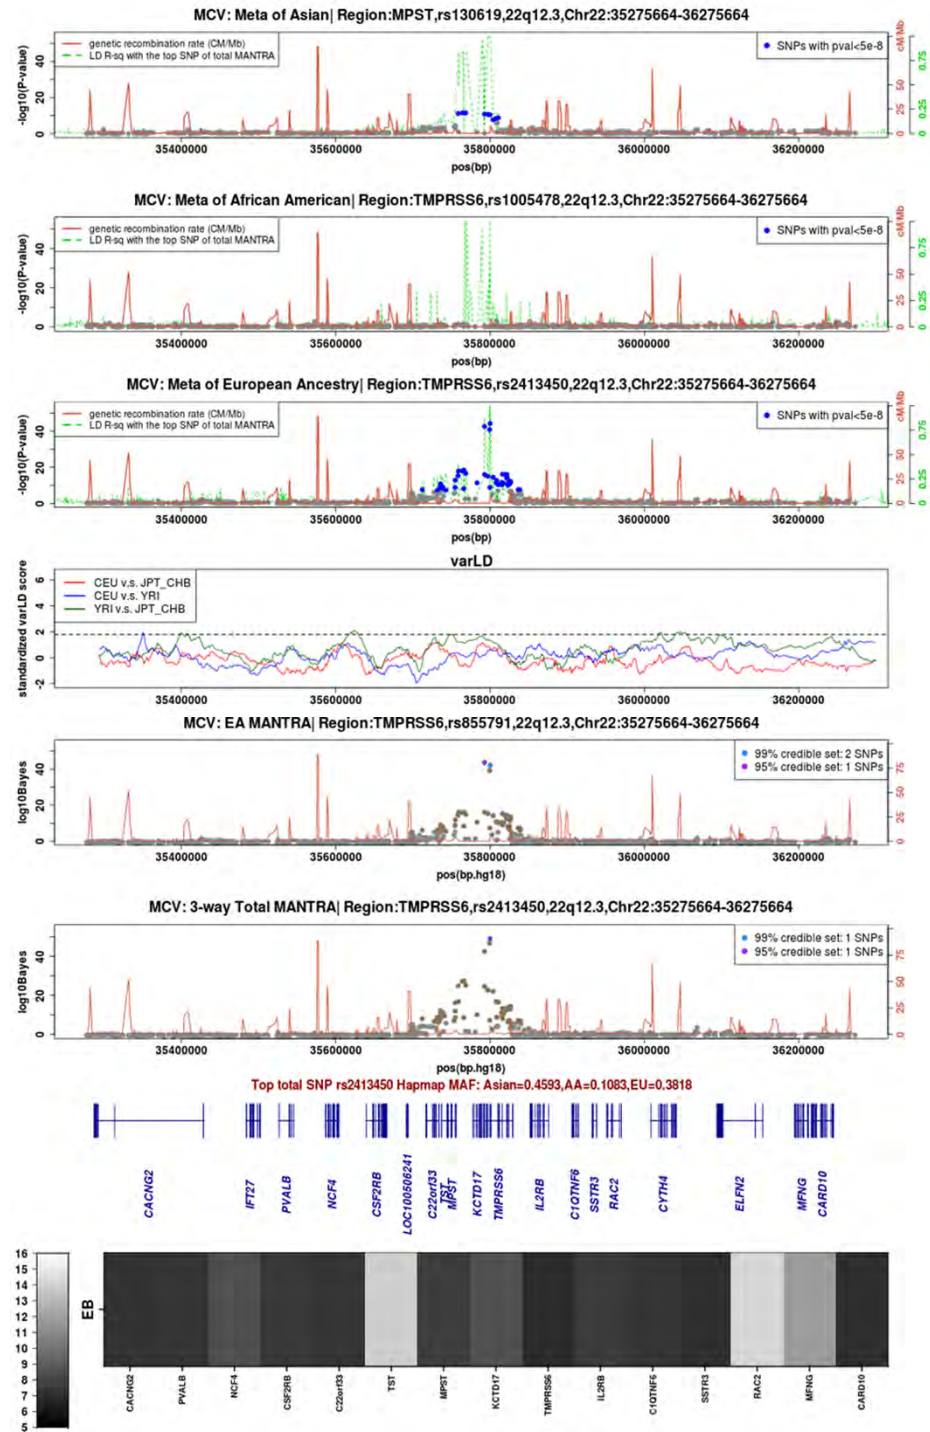

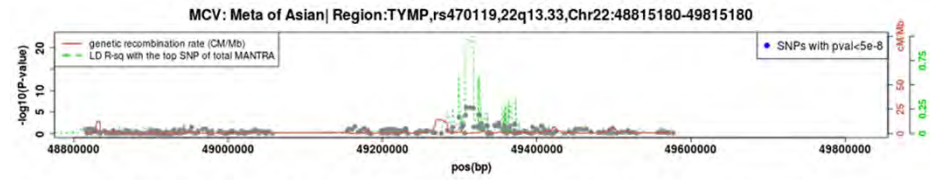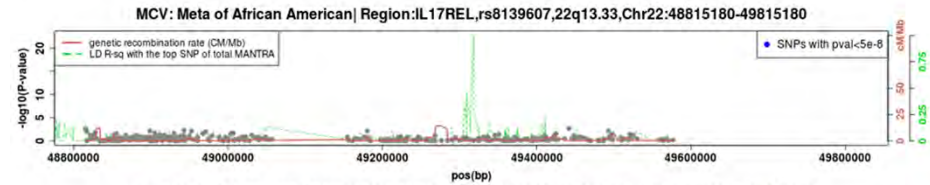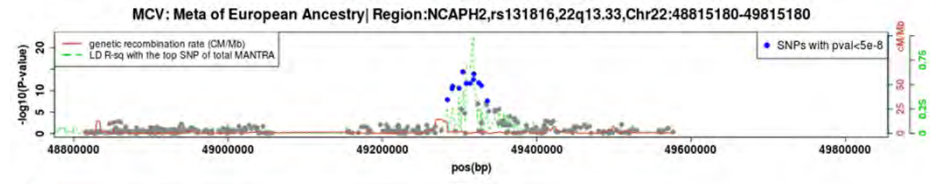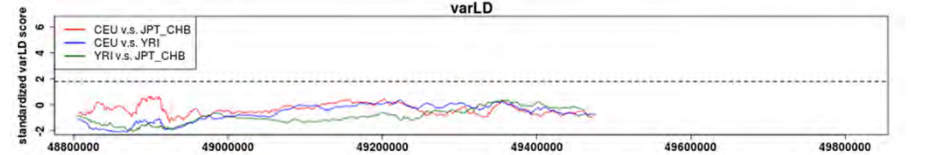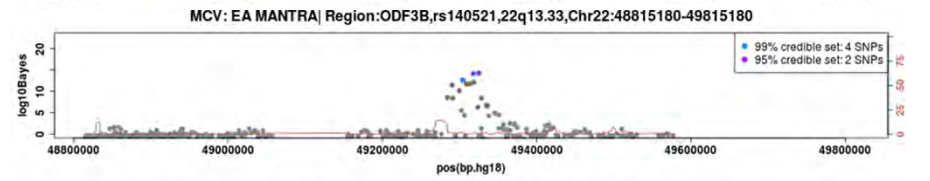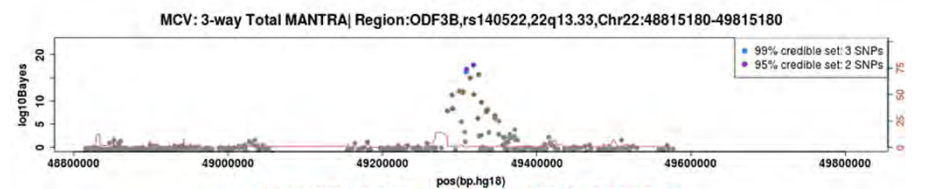

Top total SNP rs140522 Hapmap MAF: Asian=0.2584, AA=0.45, EU=0.2833

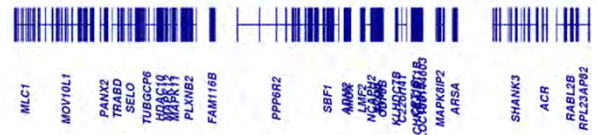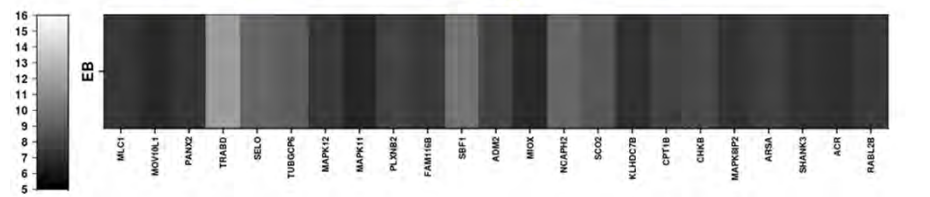

**RBC**

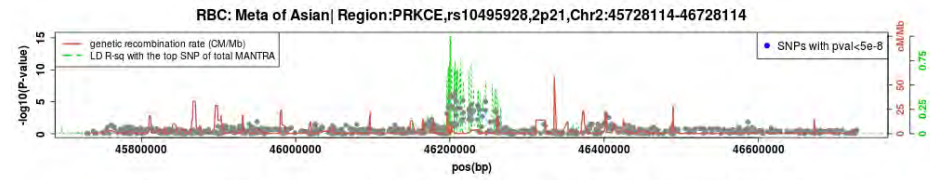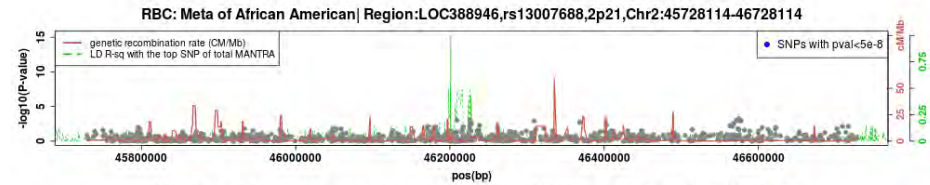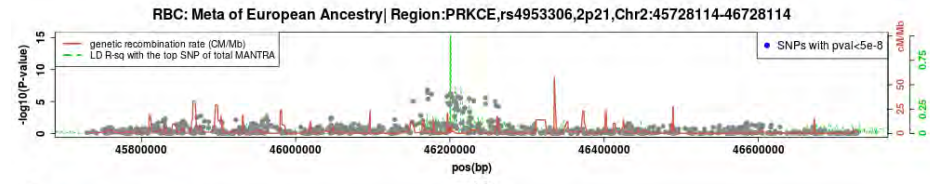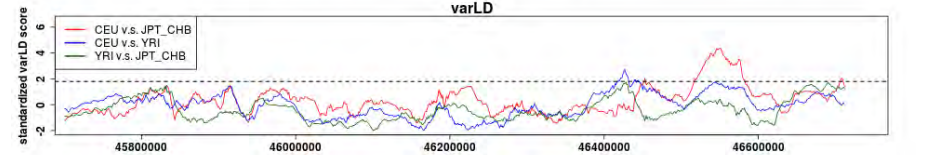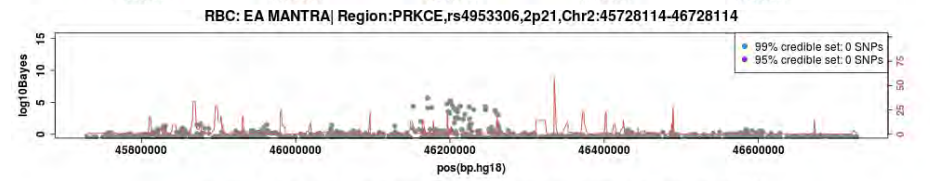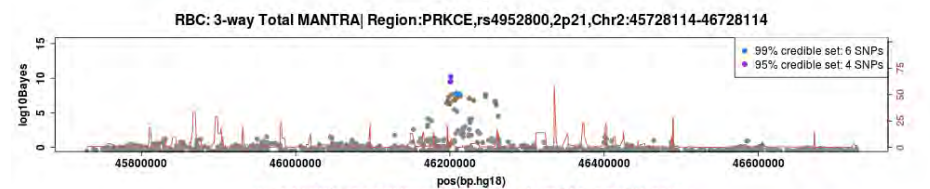

Top total SNP rs4952800 Hapmap MAF: Asian=0.1667, AA=0.325, EU=0.3333

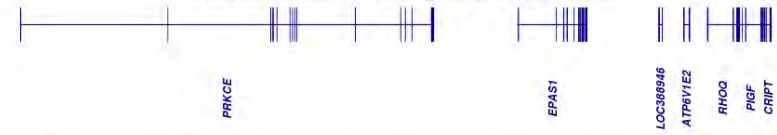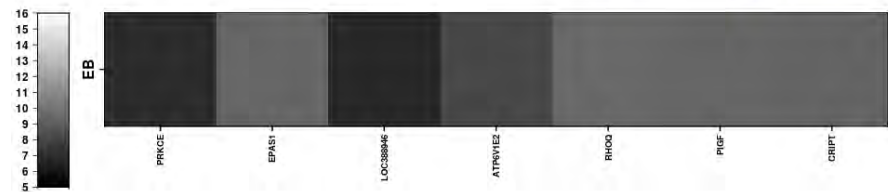

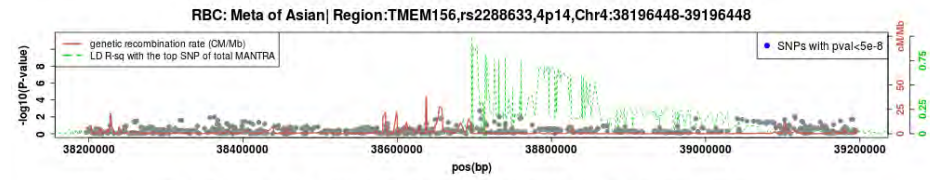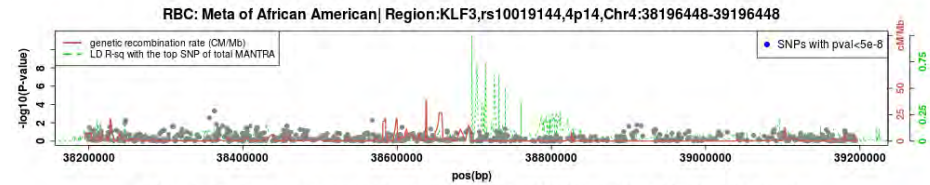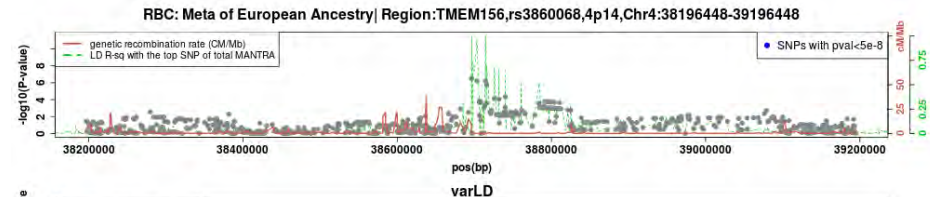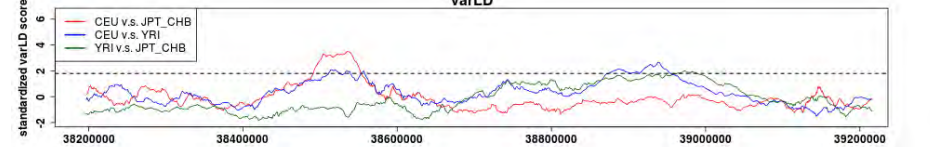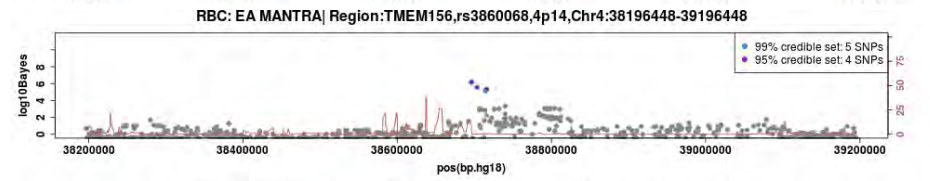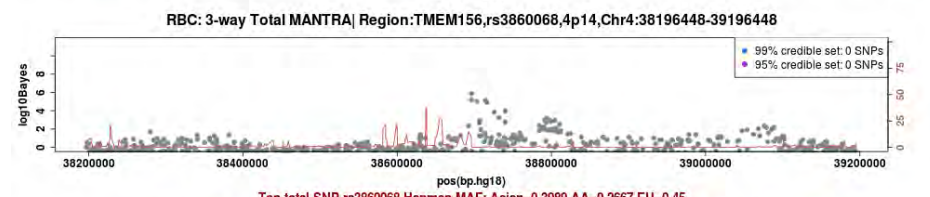

Top total SNP rs3860068 Hapmap MAF: Asian=0.3989, AA=0.2667, EU=0.45

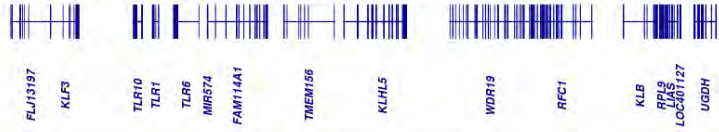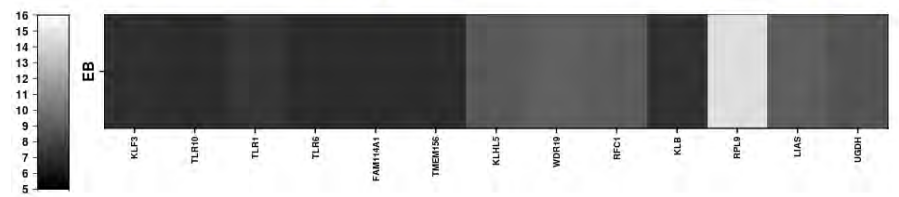

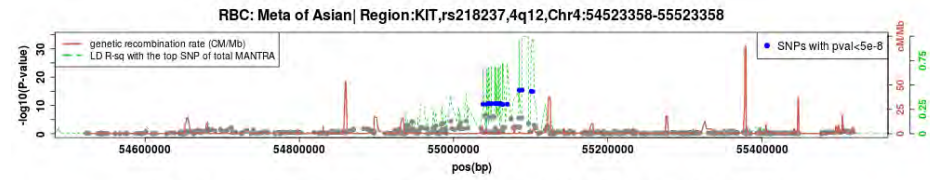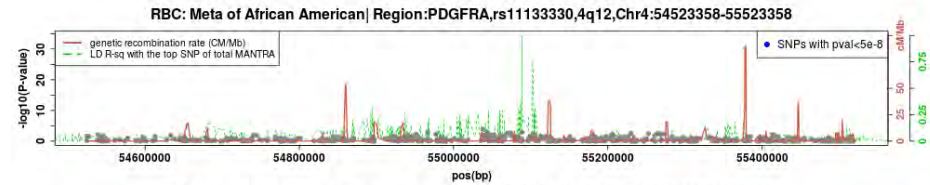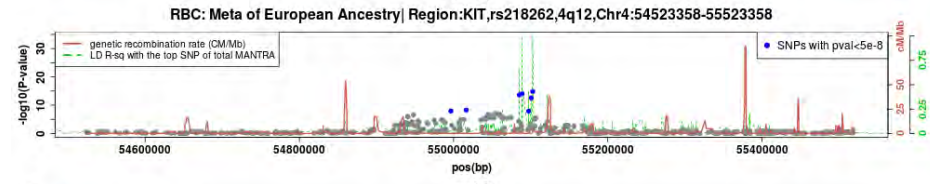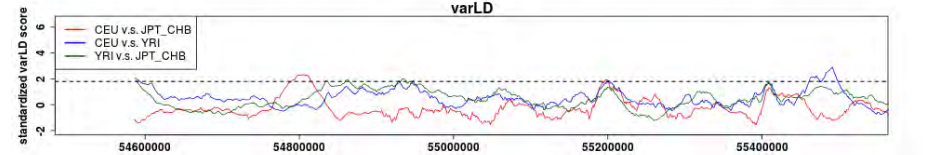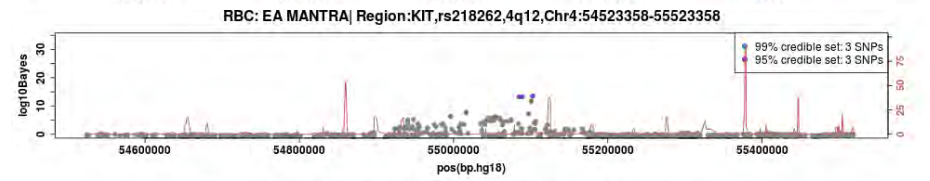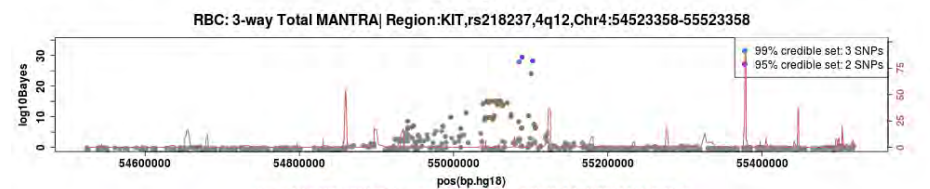

Top total SNP rs218237 Hapmap MAF: Asian=0.3258,AA=0.2712,EU=0.1102

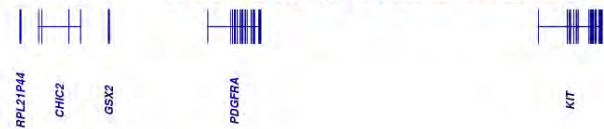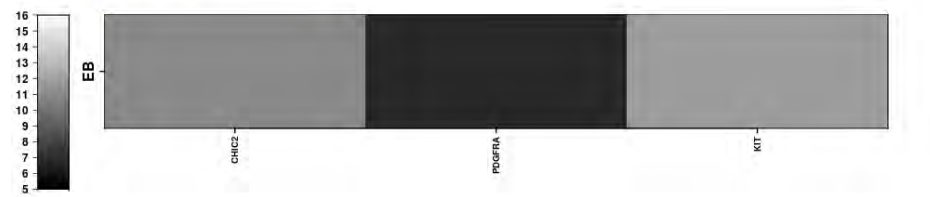

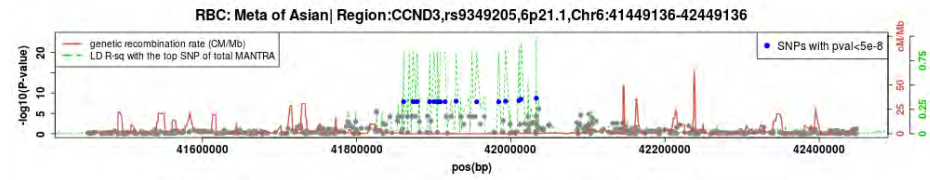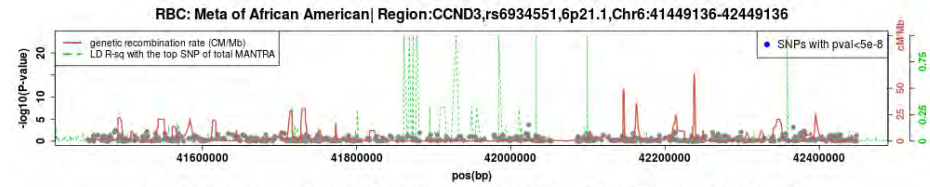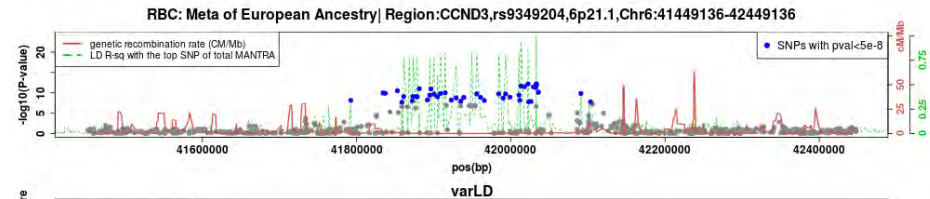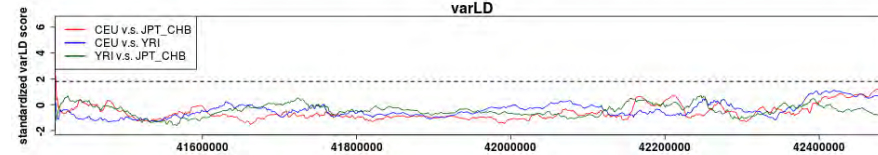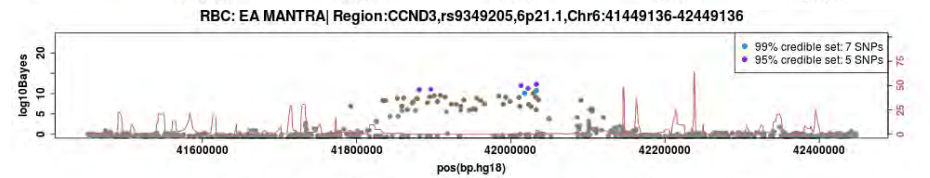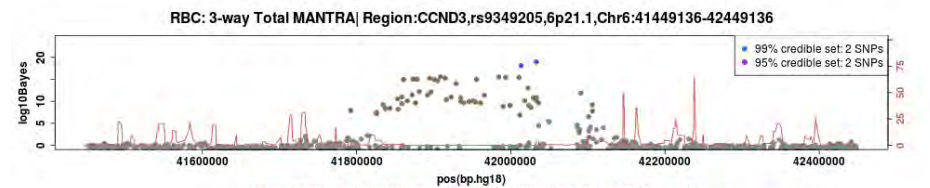

Top total SNP rs9349205 Hapmap MAF: Asian=0.2216, AA=0.00833, EU=0.1964

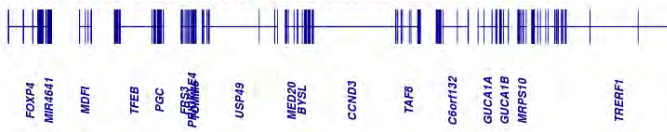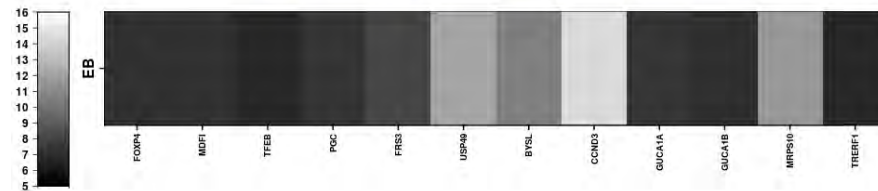

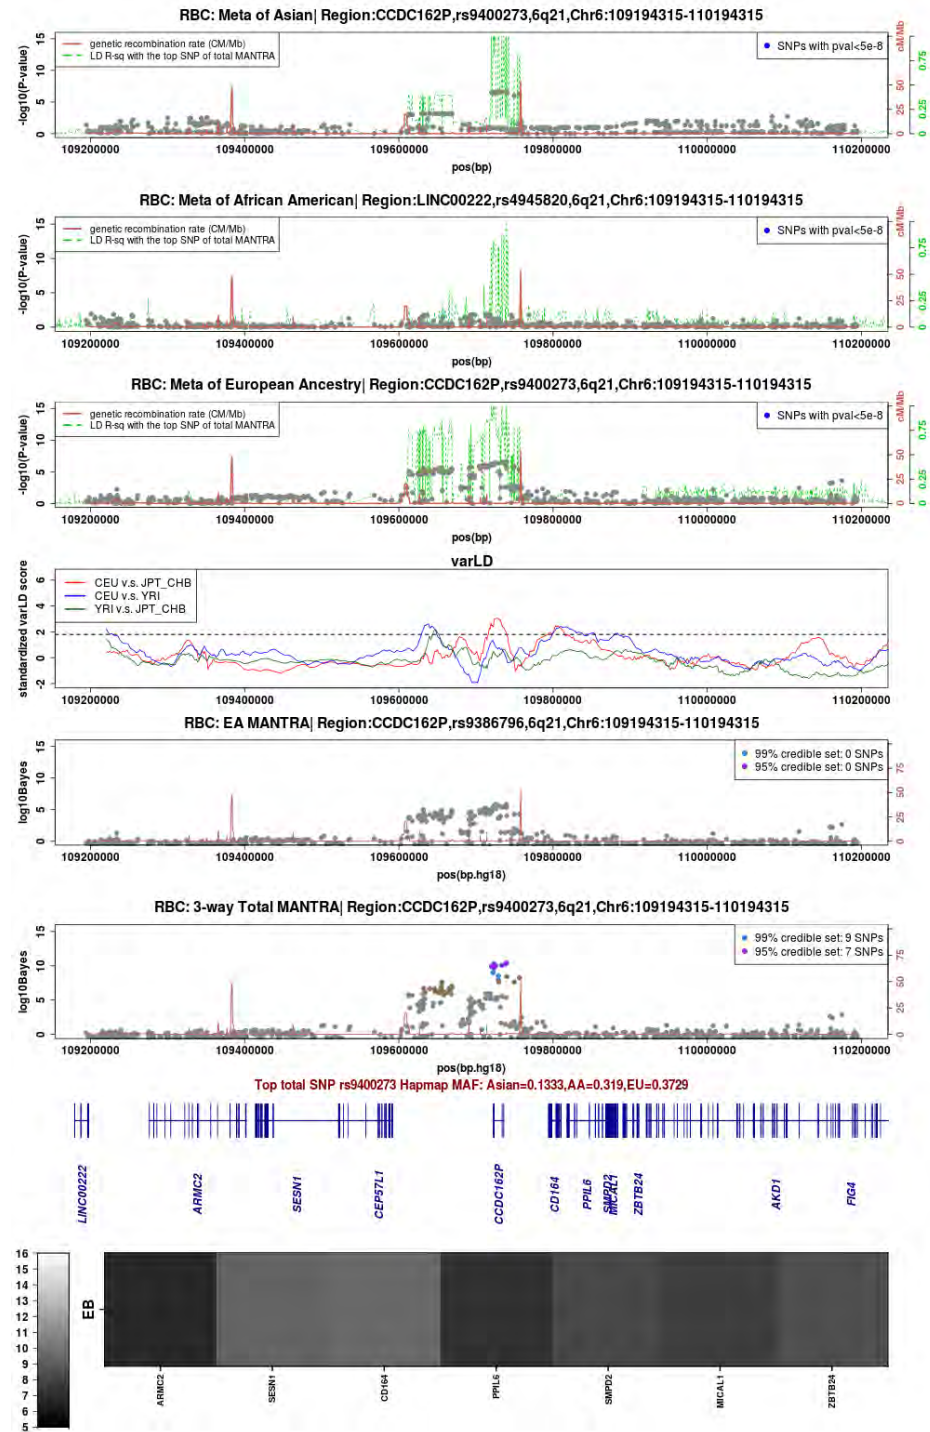



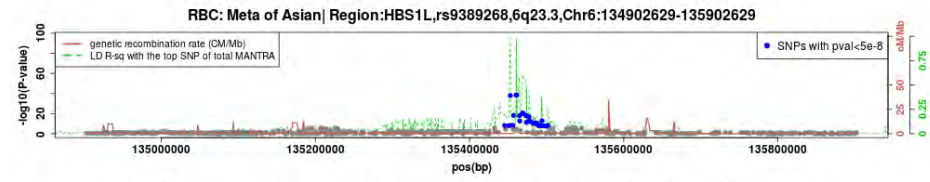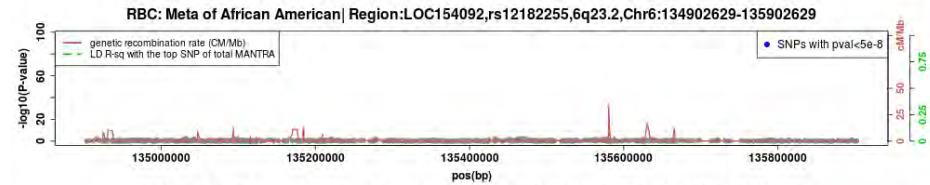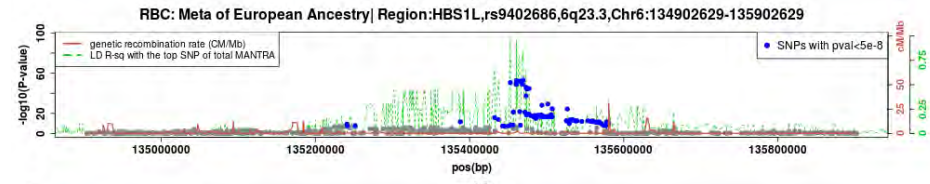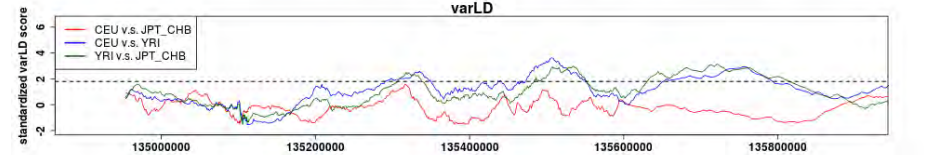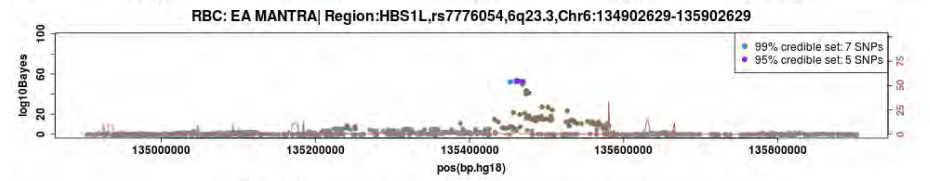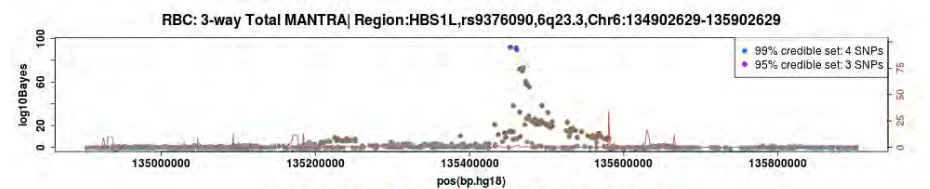

Top total SNP rs9376090 Hapmap MAF: Asian=0.3167, AA=0, EU=0.2203

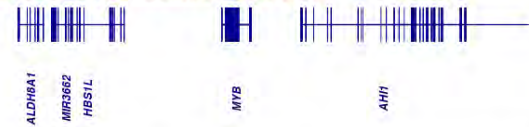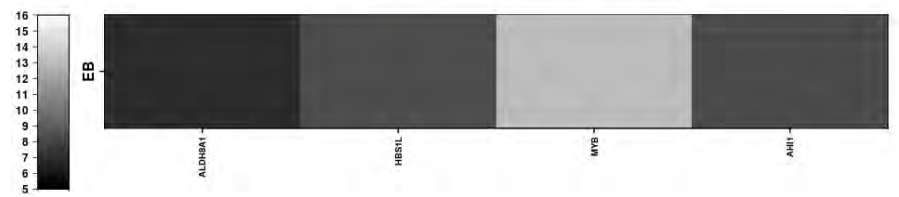

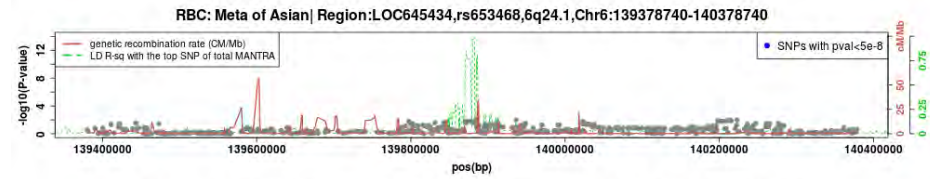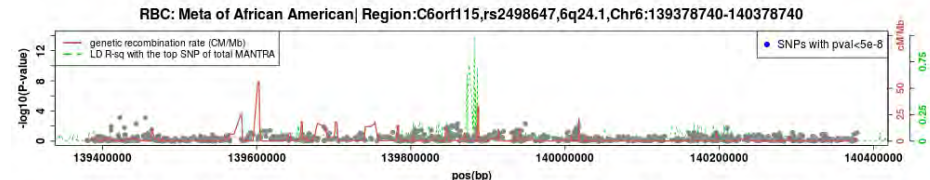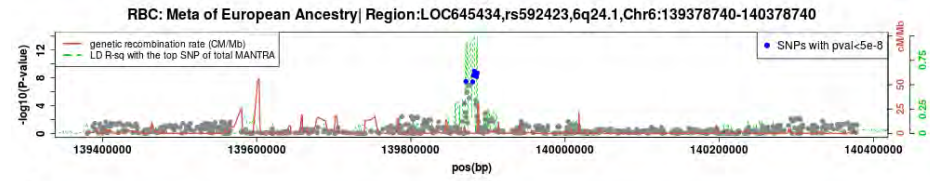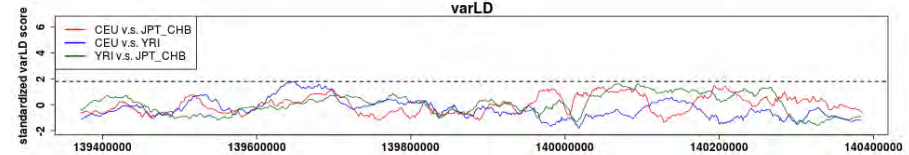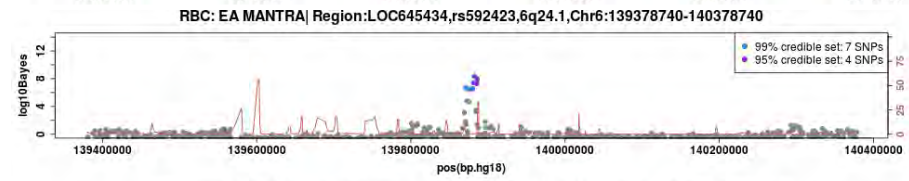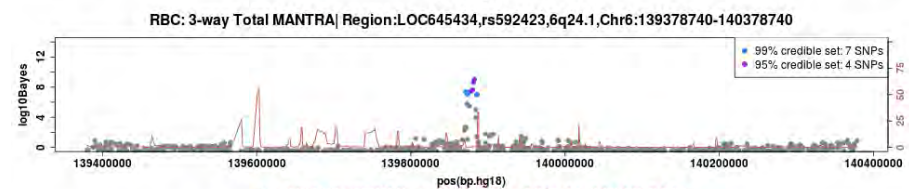

Top total SNP rs592423 Hapmap MAF: Asian=0.2722, AA=0.475, EU=0.4583

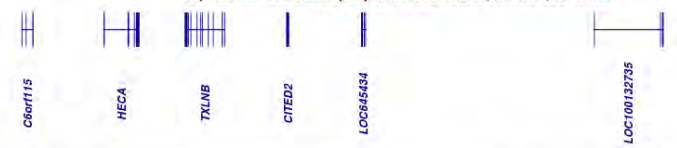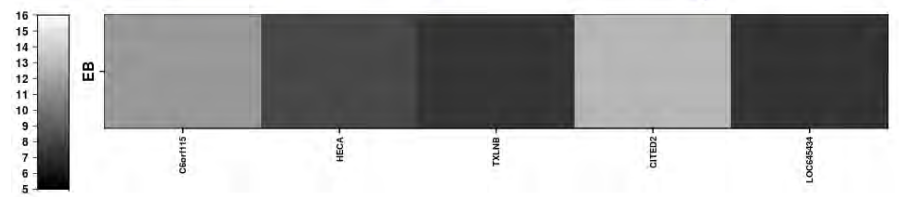

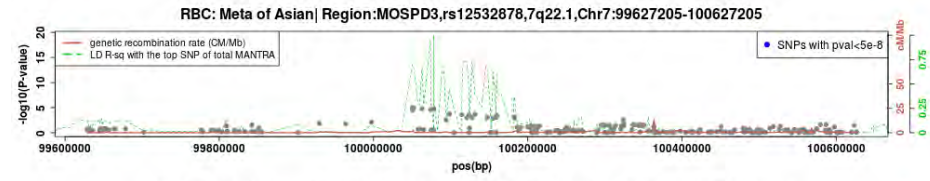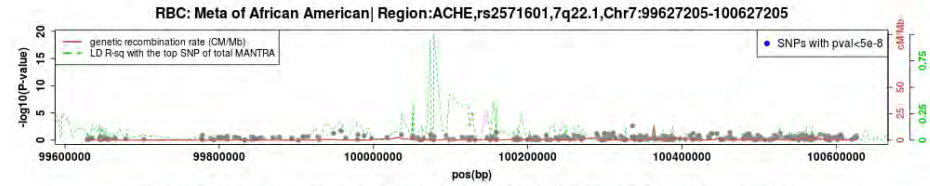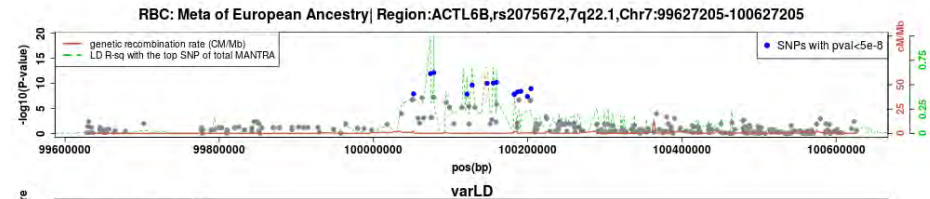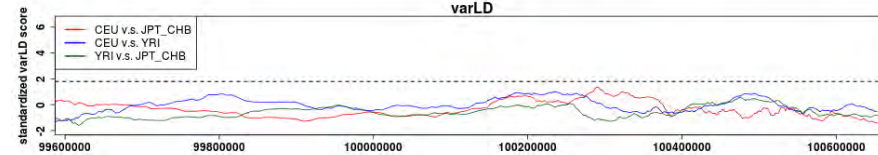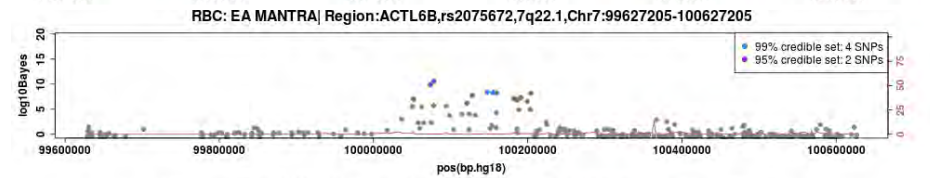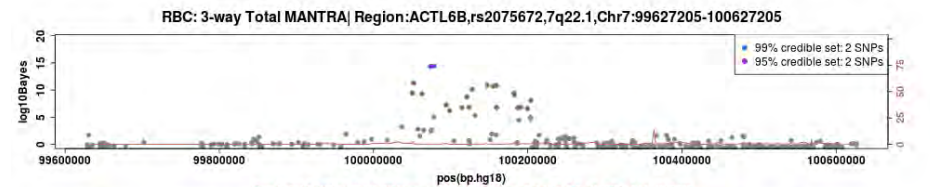

Top total SNP rs2075672 Hapmap MAF: Asian=0.1404,AA=0.3305,EU=0.3621

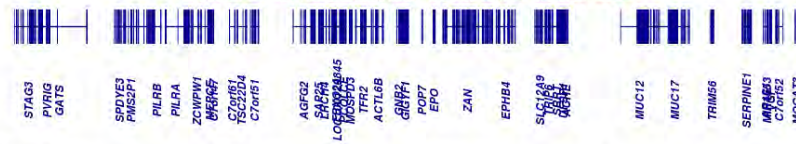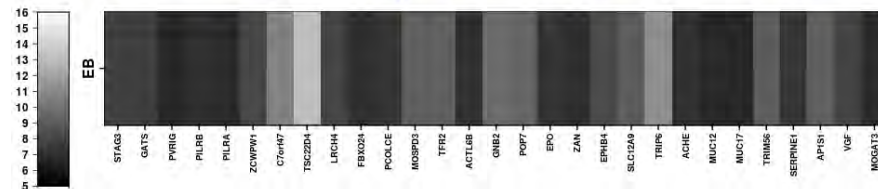

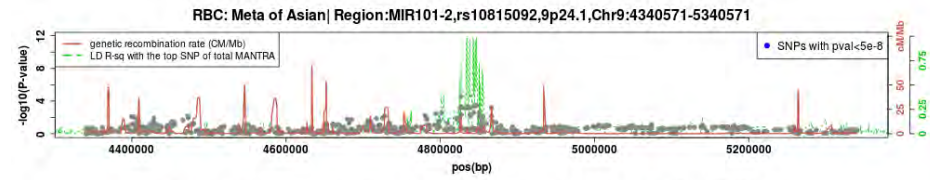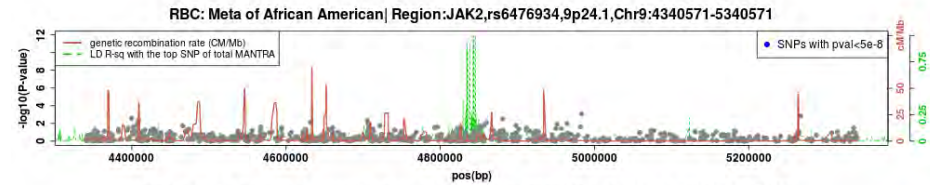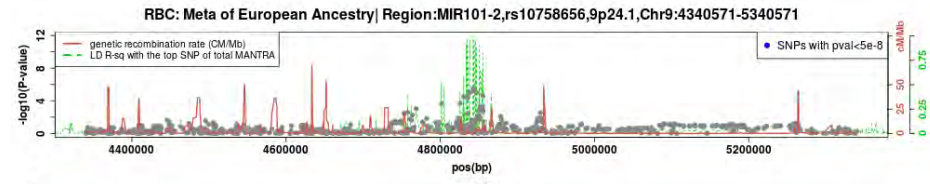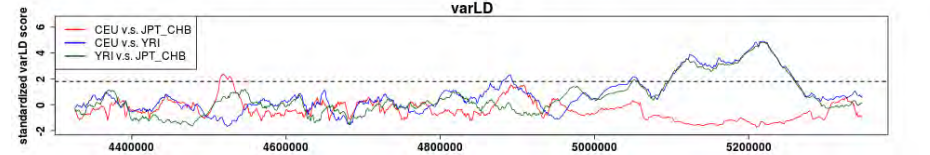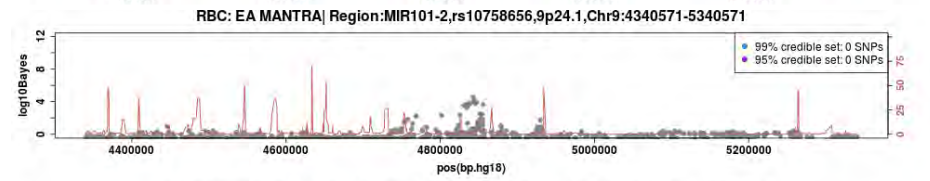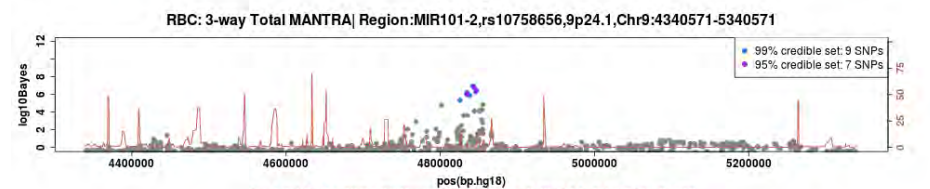

Top total SNP rs10758656 Hapmap MAF: Asian=0.4944, AA=0.1333, EU=0.2018

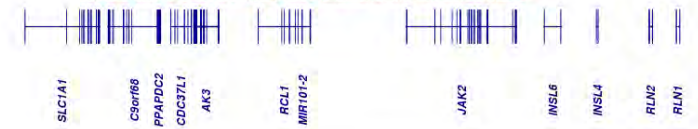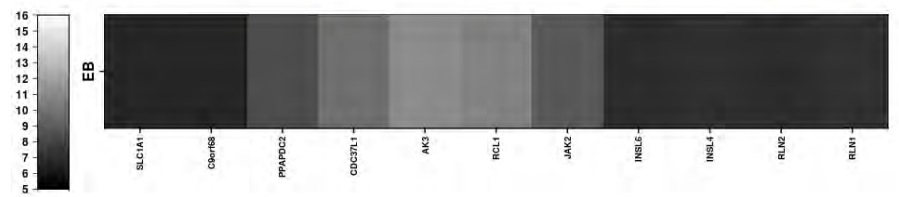

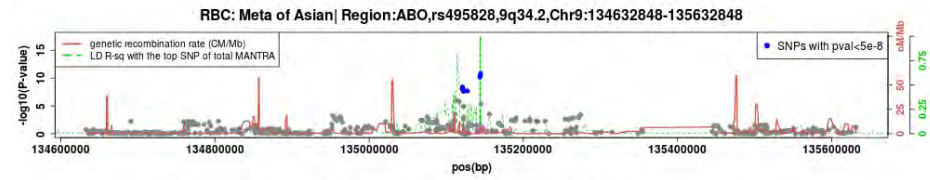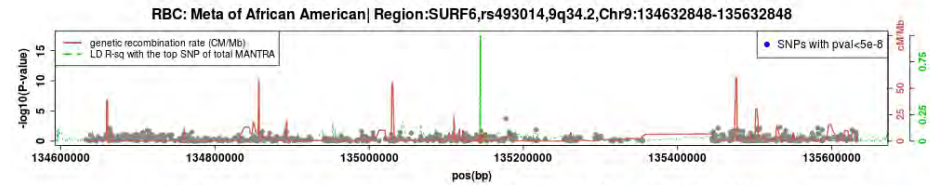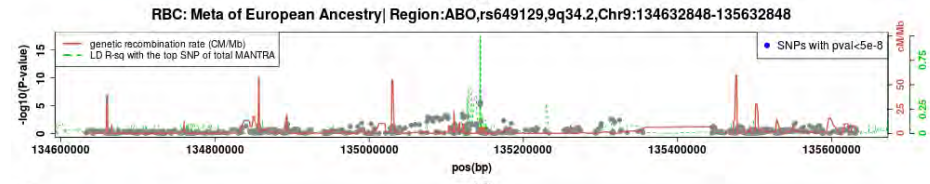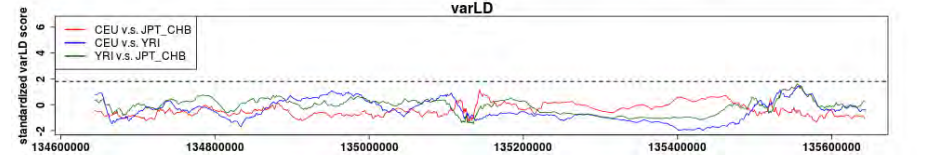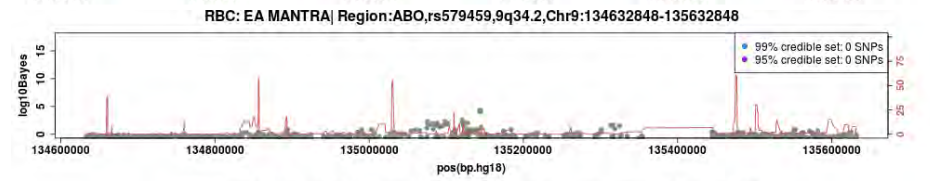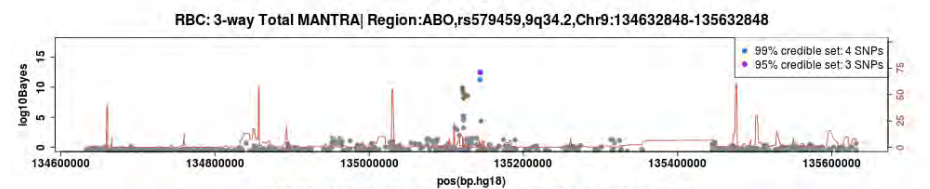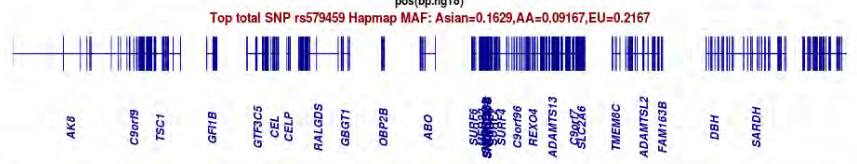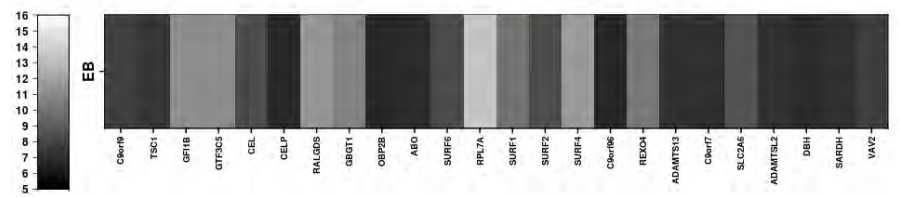

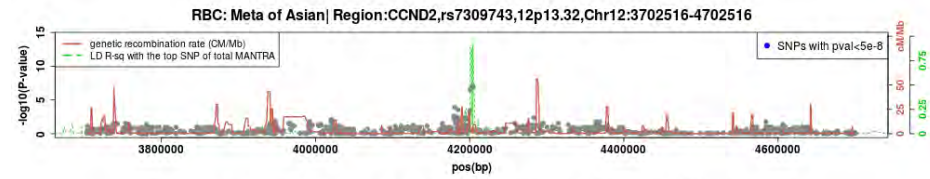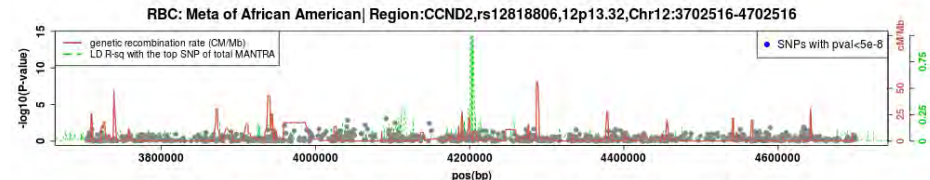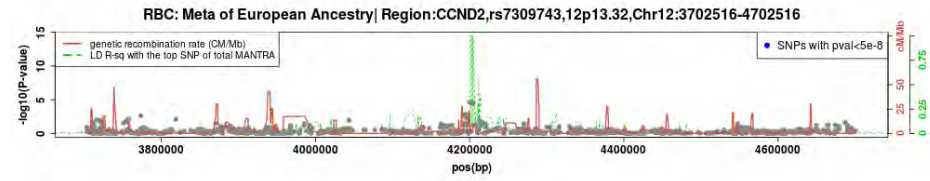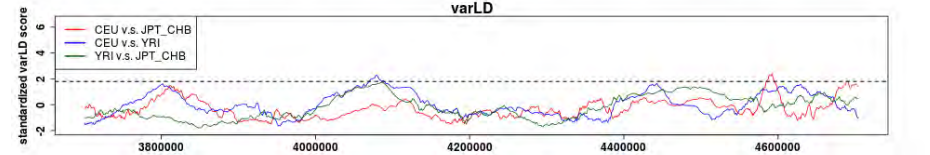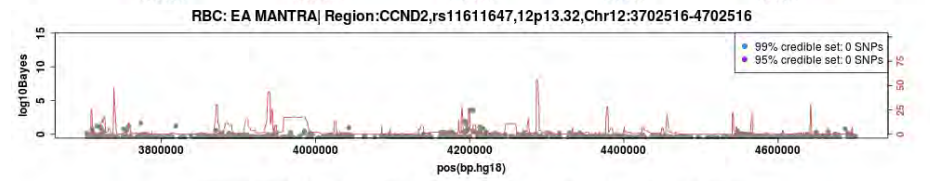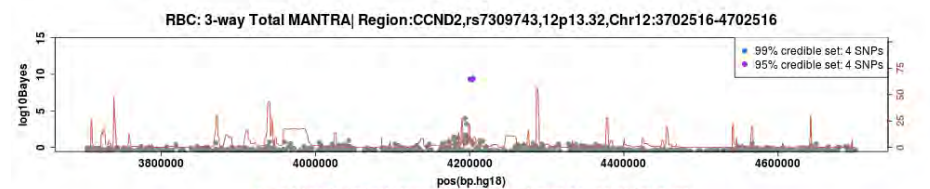

Top total SNP rs7309743 Hapmap MAF: Asian=0.2882, AA=0.3061, EU=0.287

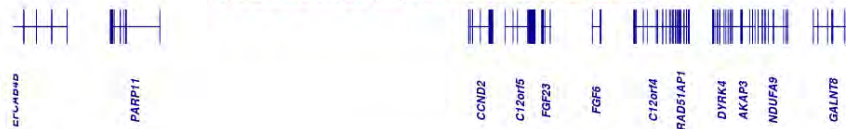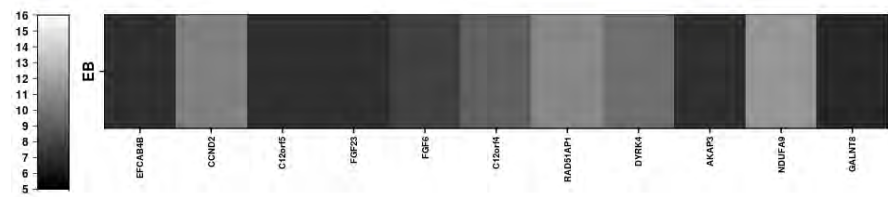

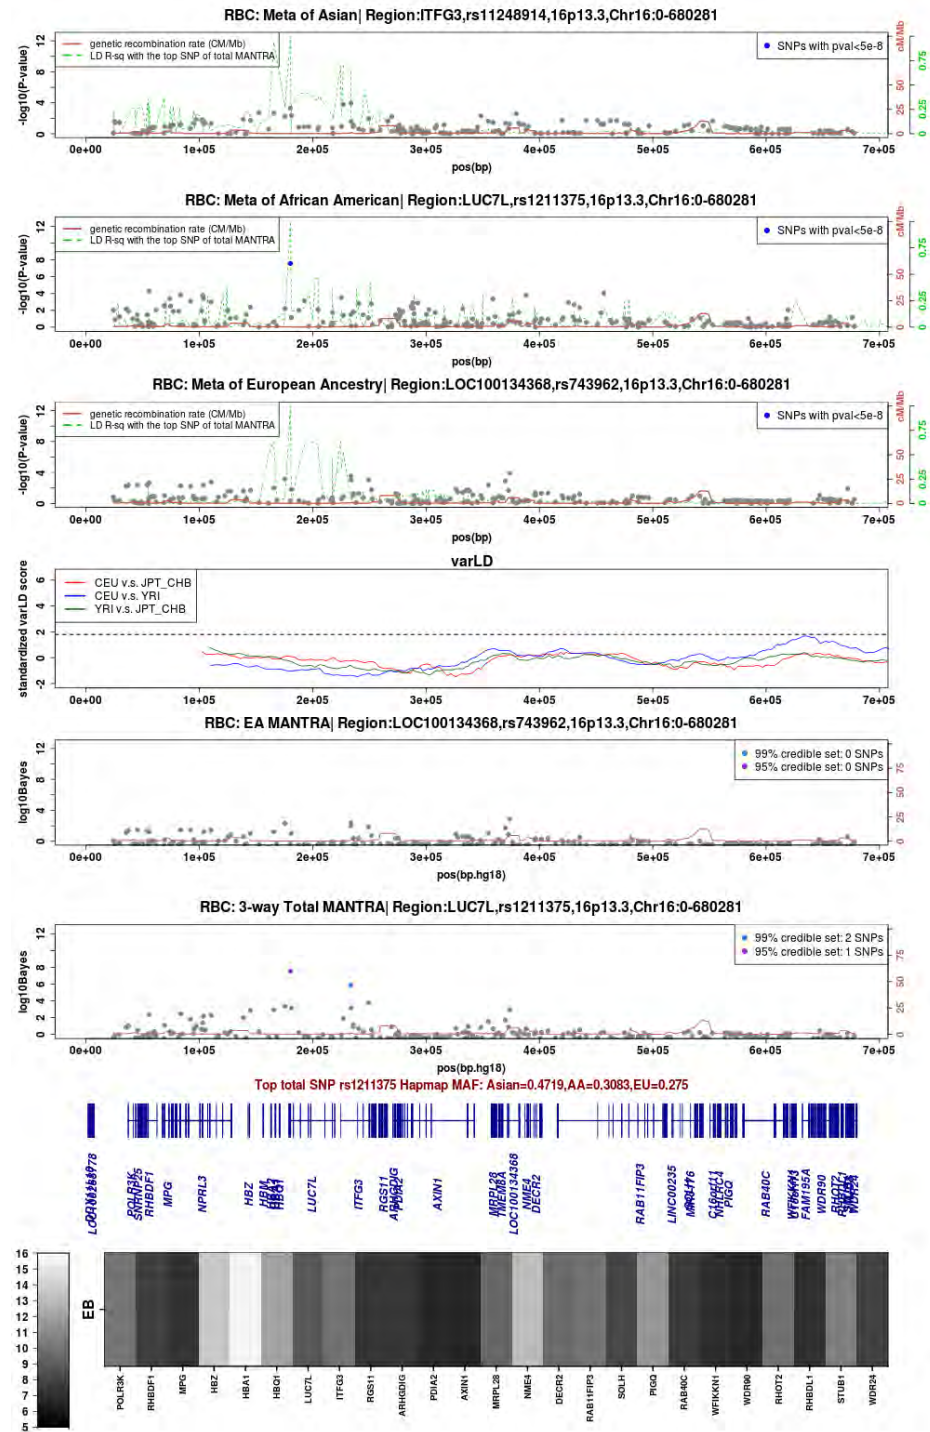

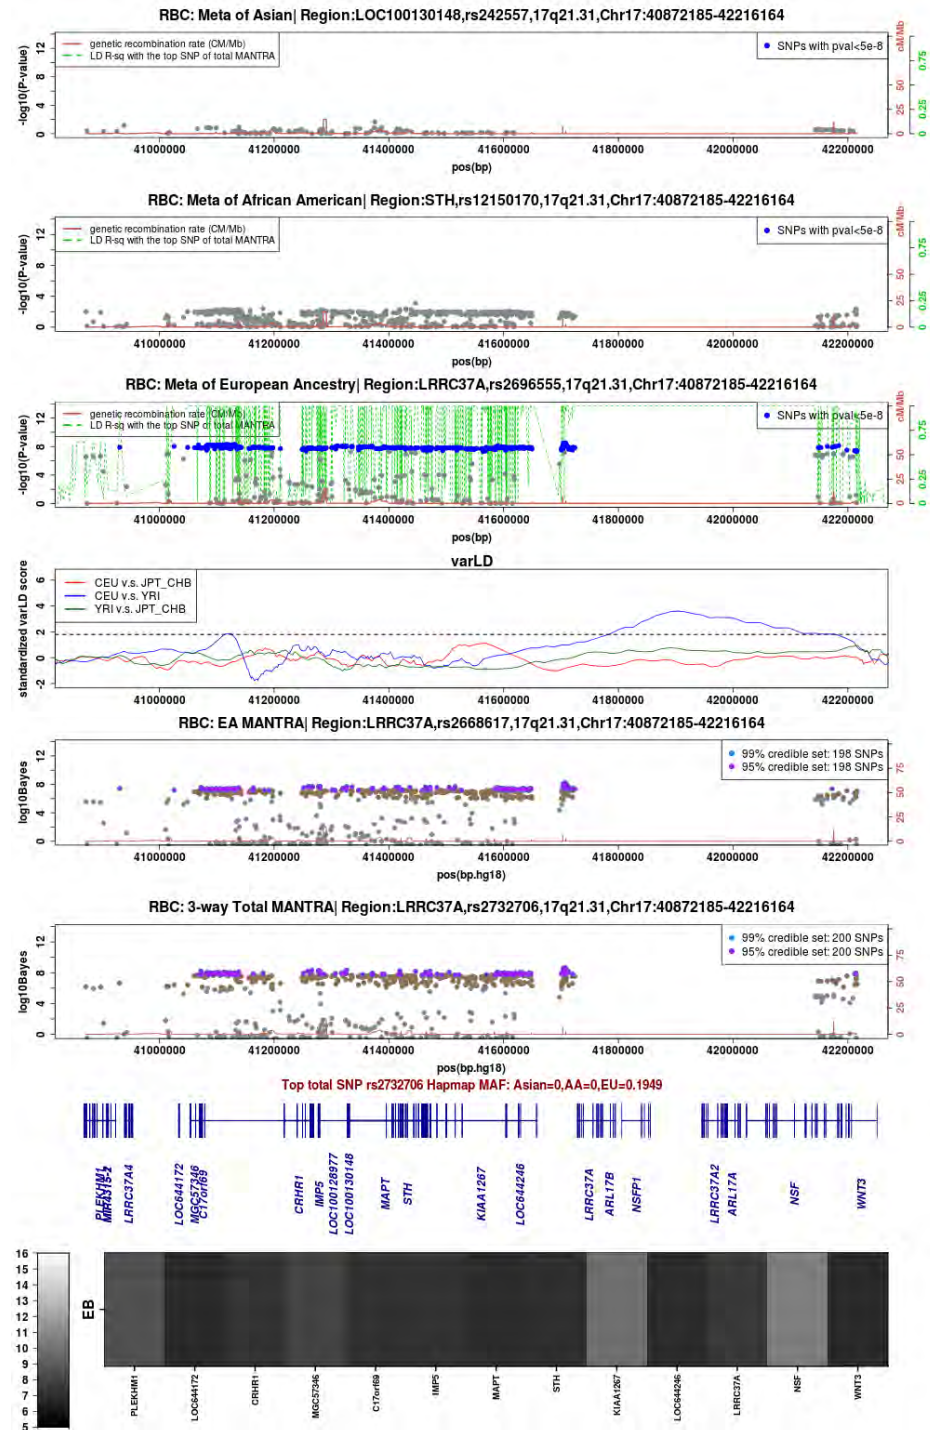





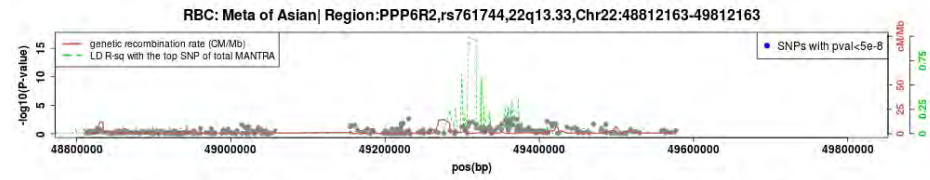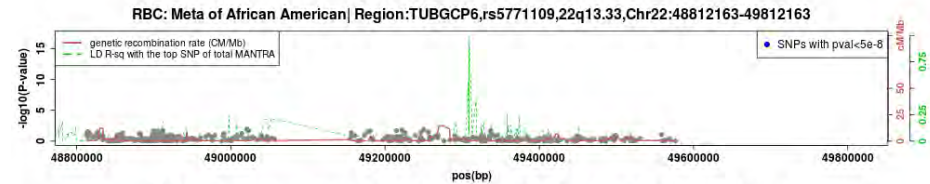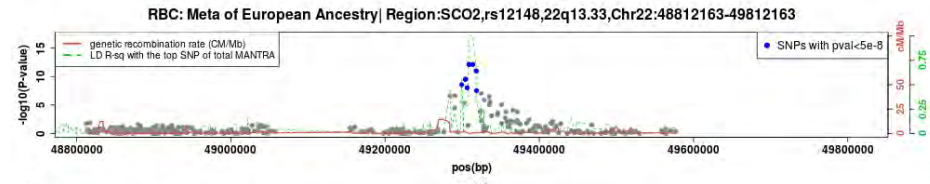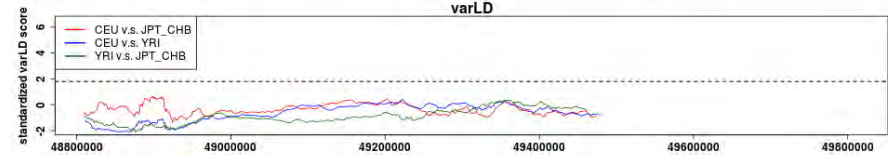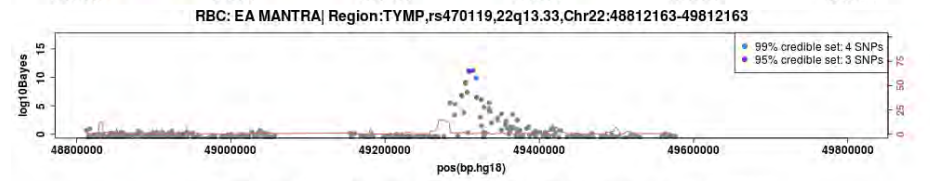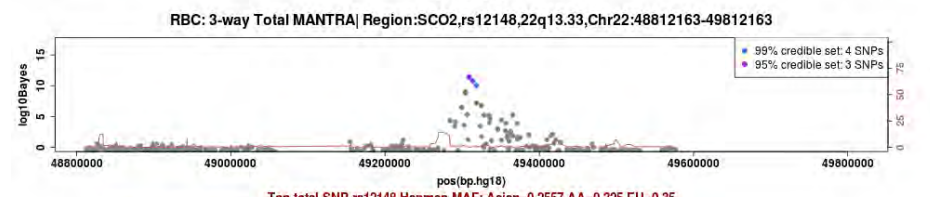

Top total SNP rs12148 Hapmap MAF: Asian=0.2557, AA=0.325, EU=0.35

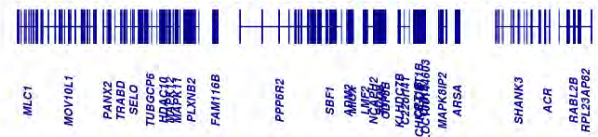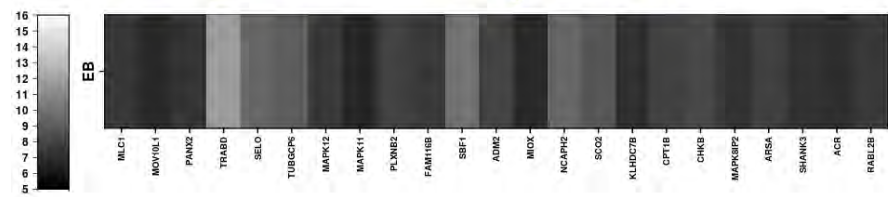

## Supplemental References

1. Harris, T. B. *et al.* Age, Gene/Environment Susceptibility-Reykjavik Study: multidisciplinary applied phenomics. *Am. J. Epidemiol.* **165**, 1076–1087 (2007).
2. Ganesh, S. K. *et al.* Multiple loci influence erythrocyte phenotypes in the CHARGE Consortium. *Nat. Genet.* **41**, 1191–1198 (2009).
3. The Atherosclerosis Risk in Communities (ARIC) Study: design and objectives. The ARIC investigators. PMID: 2646917. *Am. J. Epidemiol.* **129**, 687–702 (1989).
4. Schmidt, R. *et al.* Assessment of cerebrovascular risk profiles in healthy persons: definition of research goals and the Austrian Stroke Prevention Study (ASPS). *Neuroepidemiology* **13**, 308–313 (1994).
5. Nalls, M. A. *et al.* Multiple Loci Are Associated with White Blood Cell Phenotypes. *PLoS Genet* **7**, e1002113 (2011).
6. Friedman, G. D. *et al.* CARDIA: study design, recruitment, and some characteristics of the examined subjects. *J. Clin. Epidemiol.* **41**, 1105–1116 (1988).
7. Fried, L. P. *et al.* The Cardiovascular Health Study: design and rationale. PMID:1669507. *Ann. Epidemiol.* **1**, 263–276 (1991).
8. Feinleib, M., Kannel, W. B., Garrison, R. J., McNamara, P. M. & Castelli, W. P. The Framingham Offspring Study. Design and preliminary data. PMID: 1208363. *Prev. Med.* **4**, 518–525 (1975).
9. Qayyum, R. *et al.* A Meta-Analysis and Genome-Wide Association Study of Platelet Count and Mean Platelet Volume in African Americans. *PLoS Genet* **8**, e1002491 (2012).
10. Vaidya, D. *et al.* Coronary Artery Disease Incidence Over 10 Years in Siblings of Patients with Premature Coronary Artery Disease. *Am. J. Cardiol.* **100**, 1410–1415 (2007).
11. Becker DM, Segal J, Vaidya D & et al. Sex differences in platelet reactivity and response to low-dose aspirin therapy. *JAMA* **295**, 1420–1427 (2006).
12. Reiner, A. P. *et al.* Genome-Wide Association Study of White Blood Cell Count in 16,388 African Americans: the Continental Origins and Genetic Epidemiology Network (COGENT). *PLoS Genet* **7**, e1002108 (2011).
13. Shepherd, J. *et al.* The design of a prospective study of Pravastatin in the Elderly at Risk (PROSPER). PROSPER Study Group. PROspective Study of Pravastatin in the Elderly at Risk. *Am. J. Cardiol.* **84**, 1192–1197 (1999).

14. Hofman, A. et al. The Rotterdam Study: 2016 objectives and design update. *Eur. J. Epidemiol.* **30**, 661–708 (2015).
15. Nakamura, Y. The BioBank Japan Project. *Clin. Adv. Hematol. Oncol. HO* **5**, 696–697 (2007).
16. Okada, Y. et al. Identification of Nine Novel Loci Associated with White Blood Cell Subtypes in a Japanese Population. *PLoS Genet* **7**, e1002067 (2011).
17. Liao, W.-L. et al. Gene polymorphisms of adiponectin and leptin receptor are associated with early onset of type 2 diabetes mellitus in the Taiwanese population. *Int. J. Obes.* **36**, 790–796 (2012).
18. Jo, J. et al. Prediction of Colorectal Cancer Risk Using a Genetic Risk Score: The Korean Cancer Prevention Study-II (KCPS-II). *Genomics Inform.* **10**, 175–183 (2012).
19. Chen, Z. et al. Genome-wide association analysis of red blood cell traits in African Americans: the COGENT Network. *Hum. Mol. Genet.* **22**, 2529–2538 (2013).
20. Taylor, H. A. et al. Toward resolution of cardiovascular health disparities in African Americans: design and methods of the Jackson Heart Study. *Ethn. Dis.* **15**, S6–4–17 (2005).
21. Design of the Women’s Health Initiative clinical trial and observational study. The Women’s Health Initiative Study Group. *Control. Clin. Trials* **19**, 61–109 (1998).
22. Wild, D. P. S. et al. Die Gutenberg Gesundheitsstudie. *Bundesgesundheitsblatt - Gesundheitsforschung - Gesundheitsschutz* **55**, 824–830 (2012).
23. Desch, K. C. et al. Linkage analysis identifies a locus for plasma von Willebrand factor undetected by genome-wide association. *Proc. Natl. Acad. Sci. U. S. A.* **110**, 588–593 (2013).
24. Mutsert, R. de et al. The Netherlands Epidemiology of Obesity (NEO) study: study design and data collection. *Eur. J. Epidemiol.* **28**, 513–523 (2013).
25. Ridker, P. M. Rosuvastatin in the Primary Prevention of Cardiovascular Disease Among Patients With Low Levels of Low-Density Lipoprotein Cholesterol and Elevated High-Sensitivity C-Reactive Protein Rationale and Design of the JUPITER Trial. *Circulation* **108**, 2292–2297 (2003).
26. Keller, M. F. et al. Trans-ethnic meta-analysis of white blood cell phenotypes. *Hum. Mol. Genet.* ddu401 (2014). doi:10.1093/hmg/ddu401
27. Watkins, N. A. et al. A HaemAtlas: characterizing gene expression in differentiated human blood cells. *Blood* **113**, e1–e9 (2009).

## **Acknowledgements**

Funding for Age, Gene/ Environment Susceptibility Reykjavik Study (AGES) was made possible by NIA/NIH contract AG000932-2 (2009) Characterization of Normal Genomic Variability. The Age, Gene/ Environment Susceptibility Reykjavik Study is funded by NIH contract N01-AG-12100, the NIA Intramural Research Program, Hjartavernd (the Icelandic Heart Association) and the Althingi (the Icelandic Parliament).

Atherosclerosis Risk in Communities Study is carried out as a collaborative study supported by National Heart, Lung, and Blood Institute contracts (HHSN268201100005C, HHSN268201100006C, HHSN268201100007C, HHSN268201100008C, HHSN268201100009C, HHSN268201100010C, HHSN268201100011C, and HHSN268201100012C), R01HL087641, R01HL59367 and R01HL086694; National Human Genome Research Institute contract U01HG004402; and National Institutes of Health contract HHSN268200625226C. The authors thank the staff and participants of the ARIC study for their important contributions. Infrastructure was partly supported by Grant Number UL1RR025005, a component of the National Institutes of Health and NIH Roadmap for Medical Research.

Cardiovascular Health Study: This CHS research was supported by NHLBI contracts HHSN268201200036C, HHSN268200800007C, N01HC55222, N01HC85079, N01HC85080, N01HC85081, N01HC85082, N01HC85083, N01HC85086; and NHLBI grants U01HL080295, R01HL087652, R01HL105756, R01HL103612, and R01HL120393 with additional contribution from the National Institute of Neurological Disorders and Stroke (NINDS). Additional support was provided through R01AG023629 from the National Institute on Aging (NIA). A full list of principal CHS investigators and institutions can be found at [CHS-NHLBI.org](http://CHS-NHLBI.org).

The provision of genotyping data was supported in part by the National Center for Advancing Translational Sciences, CTSI grant UL1TR000124, and the National Institute of Diabetes and Digestive and Kidney Disease Diabetes Research Center (DRC) grant DK063491 to the Southern California Diabetes Endocrinology Research Center.

The content is solely the responsibility of the authors and does not necessarily represent the official views of the National Institutes of Health.

The National Heart, Lung, and Blood Institute's Framingham Heart Study is a joint project of the National Institutes of Health and Boston University School of Medicine and was supported by the National Heart, Lung, and Blood Institute's Framingham Heart Study (contract No. N01-HC-25195) and its contract with Affymetrix for genotyping services (contract No. N02-HL-6-4278). Analyses reflect the efforts and resource development from the Framingham Heart Study investigators participating in the SNP Health Association Resource (SHARe) project. A portion of this research was conducted using the Linux Cluster for Genetic Analysis (LinGA-II) funded by the Robert Dawson Evans Endowment of the Department of Medicine at the Boston University School of Medicine and Boston Medical Center. The views expressed in this manuscript are those of the authors and do not necessarily represent the views of the National Heart, Lung, and Blood Institute; the National Institutes of Health; or the U.S. Department of Health and Human Services.

The Health ABC Study was supported in part by the Intramural Research Program of the NIH, National Institute on Aging, NIA contracts N01AG62101, N01AG62103 and N01AG 62106. The GWAS was funded by NIA grant 1R01AG032098- 01A1 to Wake Forest University Health Sciences and genotyping services were provided by the Center for Inherited Disease Research (CIDR). CIDR is fully funded through a federal contract from the National

Institutes of Health to The Johns Hopkins University (contract number HHSN268200782096C).

The PROSPER study was supported by an investigator initiated grant obtained from Bristol-Myers Squibb. Prof. Dr. J. W. Jukema is an Established Clinical Investigator of the Netherlands Heart Foundation (grant 2001 D 032). Support for genotyping was provided by the seventh framework program of the European commission (grant 223004) and by the Netherlands Genomics Initiative (Netherlands Consortium for Healthy Aging grant 050-060-810).

The InChianti Study was supported as a 'targeted project' (ICS 110.1RS97.71) by the Italian Ministry of Health, by the US National Institute on Aging (contracts N01-AG-916413, N01-AG-821336, 263 MD 9164 13 and 263 MD 821336) and in part by the Intramural Research Program, National Institute on Aging, National Institutes of Health, USA.

The generation and management of GWAS genotype data for the Rotterdam Study (RS I, RS II, RS III) was executed by the Human Genotyping Facility of the Genetic Laboratory of the Department of Internal Medicine, Erasmus MC, Rotterdam, The Netherlands. The GWAS datasets are supported by the Netherlands Organisation of Scientific Research NWO Investments (nr. 175.010.2005.011, 911-03-012), the Genetic Laboratory of the Department of Internal Medicine, Erasmus MC, the Research Institute for Diseases in the Elderly (014-93-015; RIDE2), the Netherlands Genomics Initiative (NGI)/Netherlands Organisation for Scientific Research (NWO) Netherlands Consortium for Healthy Aging (NCHA), project nr. 050-060-810. We thank Pascal Arp, Mila Jhamai, Marijn Verkerk, Lizbeth Herrera and Marjolein Peters, MSc, and Carolina Medina-Gomez, MSc, for their help in creating the GWAS database, and Karol Estrada, PhD, Yurii Aulchenko, PhD, and Carolina Medina-Gomez, MSc, for the creation and analysis of imputed data. The Rotterdam Study is funded by Erasmus Medical Center and Erasmus University, Rotterdam, Netherlands Organization for the Health Research and

Development (ZonMw), the Research Institute for Diseases in the Elderly (RIDE), the Ministry of Education, Culture and Science, the Ministry for Health, Welfare and Sports, the European Commission (DG XII), and the Municipality of Rotterdam. The authors are grateful to the study participants, the staff from the Rotterdam Study and the participating general practitioners and pharmacists.

Funding for COGENT was obtained through the Broad Institute (N01-HC- 65226) to create this genotype/phenotype database for wide dissemination to the biomedical research community.

Coronary Artery Risk in Young Adults (CARDIA): University of Alabama at Birmingham (N01-HC- 48047), University of Minnesota (N01-HC-48048), North-western University (N01-HC-48049), Kaiser Foundation Research Institute (N01-HC-48050), University of Alabama at Birmingham (N01-HC-95095), Tufts-New England Medical Center (N01-HC-45204), Wake Forest University (N01-HC- 45205), Harbor-UCLA Research and Education Institute (N01- HC-05187), University of California, Irvine (N01-HC-45134 and N01-HC-95100).

Jackson Heart Study (JHS): Contracts HHSN268201300046C, HHSN268201300047C, HHSN268201300048C, HHSN268201300049C, HHSN268201300050C from the National Heart, Lung, and Blood Institute and the National Institute on Minority Health and Health Disparities. .

Healthy Aging in Neighborhoods of Diversity across the Life Span Study (HANDLS): This research was supported by the Intramural Research Program of the NIH, National Institute on Aging and the National Center on Minority Health and Health Disparities (intra- mural project # Z01-AG000513 and human subjects protocol # 2009-149).



Health ABC: This research was supported by NIA contracts N01AG62101, N01AG62103 and N01AG62106. The GWAS was funded by NIA grant 1R01AG032098-01A1 to Wake Forest University Health Sciences and genotyping services were provided by the Center for Inherited Disease Research (CIDR). CIDR is fully funded through a federal contract from the National Institutes of Health to The Johns Hopkins University (contract number HHSN268200782096C). This research was supported in part by the Intramural Research Program of the NIH, National Institute on Aging.

GeneSTAR: This research was supported by the National Heart, Lung, and Blood Institute (NHLBI) through the PROGENI (U01 HL72518) and STAMPEED (R01 HL087698-01) consortia. Additional support was provided by grants from the NIH/National Institute of Nursing Research (R01 NR08153) and the NIH/National Center for Research Resources (M01-RR000052) to the Johns Hopkins General Clinical Research Center.

Women's Health Initiative (WHI): The WHI program is funded by the National Heart, Lung, and Blood Institute, National Institutes of Health, U.S. Department of Health and Human Services through contracts HHSN268201100046C, HHSN268201100001C, HHSN268201100002C, HHSN268201100003C, HHSN268201100004C, and HHSN271201100004C..

Funding for RIKEN and the BioBank Japan Project was supported by Ministry of Education, Culture, Sports, Science and Technology, Japan.

The Gutenberg Health Study is funded through the government of Rhineland-Palatinate („Stiftung Rheinland-Pfalz für Innovation“, contract AZ 961-386261/733), the research programs “Wissen schafft Zukunft” and “Center for Translational Vascular Biology (CTVB)” of the Johannes Gutenberg-University of Mainz, and its contract with Boehringer Ingelheim and

PHILIPS Medical Systems, including an unrestricted grant for the Gutenberg Health Study. VG PSW are funded by the Federal Ministry of Education and Research (BMBF 01EO1503). TZ and PSW are PIs of the German Center for Cardiovascular Research. The remaining authors have nothing to declare.

The Genes and Blood Clotting Study was supported by the National Institute of Health grants R37HL039693 (K.C.D., D.G.) and RO1HL112642 (A.B.O., K.C.D.,J.Z.L., D.G.). Additionally, David Ginsburg is a Howard Hughes Medical Institute investigator.

The authors of the NEO study thank all individuals who participated in the Netherlands Epidemiology in Obesity study, all participating general practitioners for inviting eligible participants and all research nurses for collection of the data. We thank the NEO study group, Pat van Beelen, Petra Noordijk and Ingeborg de Jonge for the coordination, lab and data management of the NEO study. The genotyping in the NEO study was supported by the Centre National de Génotypage (Paris, France), headed by Jean-Francois Deleuze. The NEO study is supported by the participating Departments, the Division and the Board of Directors of the Leiden University Medical Center, and by the Leiden University, Research Profile Area Vascular and Regenerative Medicine. Dennis Mook-Kanamori is supported by Dutch Science Organization (ZonMW-VENI Grant 916.14.023).

The JUPITER trial and the genotyping were supported by AstraZeneca.

The development of the software package MANTRA was performed by Andrew P. Morris, a Wellcome Trust Senior Research Fellow in Basic Biomedical Science (grant numbers WT098017, WT090532 and WT064890).

Professor Luanne L. Peters (LLP) is supported by NIH grants HL085480 and DK100692, and by National Cancer Institute Award P30CA034196 to the Jackson Laboratory. Santhi.K.Ganesh is supported by the Doris Duke Charitable Foundation and NIH HL122684 grants. Yukinori

Okada was supported by the Japan Society for the Promotion of Science (JSPS) KAKENHI grant numbers 15H05911, 15H05670, 15K14429, the Japan Science and Technology Agency (JST), Mochida Memorial Foundation for Medical and Pharmaceutical Research, Takeda Science Foundation, Gout Research Foundation, the Tokyo Biochemical Research Foundation, and the Japan Rheumatism Foundation. Robert J. Klein was supported by grant number U01 HG007033 from NHGRI.

Bruce.M.Psaty serves on the DSMB of a clinical trial funded by the manufacturer (Zoll LifeCor) and on the Steering Committee of the Yale Open Data Access project funded by Johnson & Johnson.

Calum A MaCrae is supported by NIH grant 5R24OD017870-03. Leonard I Zon is supported by NIH grant 4R01HL048801-24. Stuart H Orkin is supported by NIH grant 1U54DK110805-01.

The funders had no role in study design, data collection and analysis, decision to publish or preparation of the manuscript.
